# *MYB5a/NEGAN* activates petal anthocyanin pigmentation and shapes the MBW regulatory network in *Mimulus luteus* var. *variegatus*

Short title: Anthocyanin regulatory network in *Mimulus*

Xingyu Zheng<sup>1</sup>, Kuenzang Om<sup>2□a</sup>, Kimmy A. Stanton<sup>2□b</sup>, Daniel Thomas<sup>2</sup>, Philip A. Cheng<sup>2</sup>, Allison Eggert<sup>2</sup>, Yao-Wu Yuan<sup>3</sup>, Joshua R. Puzey<sup>1\*</sup>, Arielle M. Cooley<sup>2\*</sup>

**1** Biology Dept, College of William & Mary, Williamsburg, VA, U.S.A.

**2** Biology Dept, Whitman College, Walla Walla, WA, U.S.A.

**3** Dept of Ecology Evolutionary Biology, University of Connecticut, Storrs, CT, U.S.A.

□a Current Address: School of Biological Sciences, Washington State University, Pullman, WA, U.S.A.

□b Current Address: Biology Dept, Duke University, Durham, NC, U.S.A..

\*Corresponding author for transcriptome analysis: puzeyjr@wm.edu

\*Corresponding author for sequence analysis, RT-PCR, and transgenics: cooleya@whitman.edu

## Abstract

Much of the visual diversity of angiosperms is due to the frequent evolution of novel pigmentation patterns in flowers. The gene network responsible for anthocyanin pigmentation, in particular, has become a model for investigating how genetic changes give rise to phenotypic innovation. In the monkeyflower genus *Mimulus*, an evolutionarily recent gain of petal lobe anthocyanin pigmentation in *M. luteus* var. *variegatus* was previously mapped to genomic region *pla2*. Here, we use DNA sequence analysis and spatiotemporal patterns of gene expression to identify *MYB5a* - homologous to the *NEGAN* transcriptional activator from *M. lewisii* - as a likely candidate gene within the *pla2* region. Transgenic manipulation of gene expression confirms that *MYB5a* is both necessary and sufficient for petal lobe anthocyanin pigmentation. The deployment of *MYB5a/NEGAN* to the petal lobe stands in contrast to its more restricted role as a nectar guide anthocyanin activator in other *Mimulus* species. Transcriptome sequencing of a *MYB5a* RNAi line reveals the degree to which other regulators of the anthocyanin pathway - including R3 MYB repressors and bHLH and WD40 co-activators - are responsive to the level of expression of *MYB5a*. Overall, this work reveals that a genetically simple change, which we hypothesize to be a regulatory mutation in *cis* to *MYB5a*, has cascading effects on gene expression, not only on the genes downstream of *MYB5a* but also on all of its known partners in the anthocyanin regulatory network.

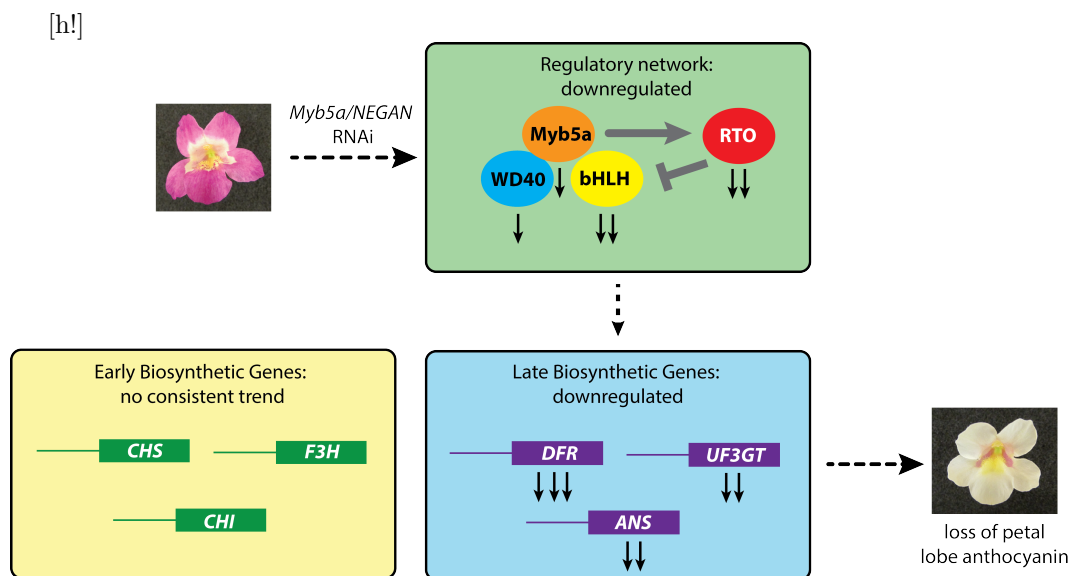

**Graphical abstract.** Solid black arrows indicate the direction (though not magnitude) of gene expression change, following RNAi knockdown of *MYB5a/NEGAN* in *M. l. variegatus*. The number of black arrows corresponds to the number of gene copies identified in the transcriptome. Grey symbols denote positive and negative regulatory interactions. RTO is an R3 MYB protein that inhibits anthocyanin biosynthesis by sequestering bHLH proteins away from the MBW complex.

## Introduction

Anthocyanins, the red and purple pigments that color many plant tissues, are largely responsible for the tremendous visual diversity of floral pigmentation in angiosperms. The evolutionary lability of anthocyanin pigmentation, combined with its ecological and agricultural importance, have led to the development of anthocyanin biosynthesis and regulation as a model for investigating the genetic mechanisms for trait evolution.

In dicots, the anthocyanin biosynthetic pathway is functionally divided into the Early Biosynthetic Genes (EBGs), which are activated in *Arabidopsis* by Subgroup 7 R2R3 MYB transcription factors [1], and the Late Biosynthetic Genes (LBGs), which are activated by an MBW complex composed of a Subgroup 6 R2R3 MYB (M) transcription factor and bHLH (B) and WD40 (W) co-factors [2, 3, 4, 5, 6]. Regulation of MBW is itself multifaceted. The complex is hypothesized to exhibit multiple autoregulatory feedback loops, and is counteracted by an R3 MYB which inhibits pigment production by competing with the R2R3 MYB for bHLH cofactors [7, 8, 9].

Evolutionary changes in the type of anthocyanin produced tend to occur primarily through mutations in enzyme-encoding genes [10]. In contrast, changes in pigment intensity, abundance, or location tend to evolve via the transcription factor loci - and disproportionately often in the R2R3 MYB genes compared to the bHLH or WD40 genes [10]. It is unclear whether this pattern arises because of relatively limited pleiotropy of the R2R3 MYB genes, their ability to coordinately affect expression of the late biosynthetic genes, or other properties of the network. Identifying the specific genes and molecular mechanisms responsible for pigment evolution across diverse taxa will assist in understanding these evolutionary trends.

The monkeyflower genus *Mimulus* has emerged as a useful system for investigating

the evolution and regulatory mechanisms of anthocyanin regulation [11, 12, 13]. In species as distantly related as *M. lewisii* and *M. guttatus* - approximately 20 MY divergent [14] - the R2R3 MYB gene *MYB5/NEGAN* appears to be a key activator of anthocyanin spots within the nectar guide region of the corolla [15, 16]. A paralogous gene, *MaMYB2/PELAN*, is responsible for the solid anthocyanin pigmentation of petals in both *M. lewisii* and *M. aurantiacus* [17, 15], which diverged approximately 30 MYA ago [14]. Although petal anthocyanin has been gained and lost repeatedly across the genus [18], too few species have been studied to determine whether the spatial partitioning between *MYB5/NEGAN* and *MaMYB2/PELAN* is a consistent feature of monkeyflower evolution.

Within the *luteus* group of *Mimulus* from Chile [19, 20, 21, 22], an expansion of floral anthocyanin pigmentation into the petal lobes has evolved repeatedly, and has been genetically mapped in each case to one of two clusters of tandemly arrayed R2R3 MYB genes [23]. The *pla1* locus, responsible for the gain of petal anthocyanin in *luteus*-group species *M. cupreus* and *M. naiandinus*, includes a cluster of MYB genes that are orthologous to *MaMyb2/PELAN*. This finding is consistent with the regulatory model for petal pigmentation in *M. aurantiacus* and *M. lewisii*. In *M. luteus* var. *variegatus*, however, the gain of petal anthocyanin maps to the genetically unlinked locus *pla2*, containing genes *MYB4* and *MYB5* [23].

Here we use sequence analysis, quantitative and qualitative RT-PCR, transgenic manipulation of gene expression, and transcriptome analysis to investigate the gain of petal anthocyanin pigmentation in *M. l. variegatus*. We identify *MYB5a*, homologous to the nectar-guide pigmentation gene *NEGAN* from *M. lewisii* [15], as the gene responsible for this evolutionarily recent trait. Transgenic experiments reveal that the spatial domain of *MYB5a* spans both the nectar guide and petal lobe regions of the corolla: downregulating the gene via RNAi eliminates both nectar guide spots and the solid pigmentation in the petal lobes, while overexpressing the gene in the yellow-flowered *M. l. luteus* results in increased nectar guide spotting as well as petal anthocyanin pigmentation. Transcriptome analysis allows us to quantify the downregulation of *MYB5a* that was achieved in our RNAi line, and identifies a corresponding downregulation of two homeologous anthocyanin-related bHLH genes, one anthocyanin-related WD40 gene, and two homeologs of the R3 MYB repressor *Red Tongue (RTO)*, as well as the late biosynthetic genes *DRF*, *ANS*, and *UF3GT*.

The results highlight how a network, and its two resulting phenotypes of nectar guide and petal lobe pigmentation, can respond in a dramatic and coordinated fashion to a relatively modest change in the expression of a single component part. They also provide a counter-example to previous work in *Mimulus*, which has documented that anthocyanin activation in the nectar guide spots versus petal lobes is partitioned between two anciently diverged paralogs.

## Materials and methods

### Plant sources and growth conditions

Seeds were originally collected from natural populations in central Chile in 2004, and were inbred for multiple generations prior to the work described here (Table 1). Seeds were sown in 2-in pots onto wet Black Gold potting soil (SunGro Horticulture, Agawam, MA) or Miracle-Gro potting soil (Scotts Miracle-Gro Co., Marysville, OH), and were misted daily until germination. For transgenic experiments, seedlings were transplanted into 6" pots to promote large size. Plants were maintained in the Whitman College greenhouse under 16-hour days and were watered daily by an automatic misting system. After expansion of the first true leaves, fertilizer (Grow Big, FoxFarm Soil Fertilizer

Co., Arcata, CA, N:P:K = 6:4:4; Open Sesame, FoxFarm Soil Fertilizer Co., Arcata, CA, N:P:K = 5:45:19; and/or Miracle-Gro Bloom Booster, Scotts Miracle-Gro Co., Marysville, OH, N:P:K = 1:3:2) was applied two to three times weekly to promote growth and flowering.

Table 1. Seed sources.

| Taxon                                   | Line ID | Generations Inbred | Population   | Location                |
|-----------------------------------------|---------|--------------------|--------------|-------------------------|
| <i>M. luteus</i> var. <i>luteus</i>     | Mll-EY7 | 12                 | El Yeso      | 33.4°S, 70.0°W (2600 m) |
| <i>M. luteus</i> var. <i>variegatus</i> | Mlv-RC6 | 11                 | Río Cipreses | 34.2°S, 70.3°W (1200 m) |

Locations from which seeds were collected is given as latitude, longitude (meters above sea level).

## Expression analyses of candidate anthocyanin-activating genes

Two candidate anthocyanin-activating genes, *MYB4* and *MYB5*, had been previously identified in *M. l. variegatus* by genetic mapping and sequence characterization [23]. Because members of the *luteus* complex are allotetraploids [24, 25, 26], many genes have a homeologous copy located on a different chromosome, which could inflate expression estimates for a target gene if care is not taken to distinguish between the copies. In the process of investigating *MYB5* in the sequenced *M. l. luteus* genome, we discovered its apparent homeolog, *MYB5b* (Fig. 1A). *MYB5* will therefore be referred to in this work as *MYB5a*, to distinguish it from its homeolog. The three exons that make up *MYB5b* are identical in their coding sequence to the first three exons of *MYB5a*. However, substantial divergence in the 5'UTR (as well as downstream of the third exon) enabled the development of copy-specific primers, allowing us to disentangle the expression of *MYB5a* from its homeolog. We were not able to identify any homeolog of *MYB4* in the *M. l. luteus* genome.

The gene responsible for activating anthocyanin biosynthesis in *M. l. variegatus* petal lobes is expected to be expressed in developing floral buds, during or just prior to the accumulation of visible anthocyanin pigment. Developmentally, this occurs approximately 72 hours before anthesis [23], before the bud has emerged from the calyx. Endpoint and quantitative RT-PCR were used to investigate patterns of expression for each candidate gene, as well as for *MYB5b*, in developing floral buds and also young leaves of the purple-lobed *M. l. variegatus* compared to the yellow-lobed *M. l. luteus*. Primers were designed based on the sequenced genome of *M. l. luteus* (Table S1), and their functionality in *M. l. variegatus* was confirmed by PCR prior to their use in expression analyses.

Although *M. l. variegatus* and *M. l. luteus* have striking differences in petal lobe pigmentation, with abundant anthocyanin production in the former and none in the latter, they share the trait of anthocyanin spotting in the nectar guide region of the corolla. Petals of developing flower buds were therefore dissected into lobe versus nectar guide components and the two tissue types were analyzed separately.

RNA was extracted using the Agilent Plant RNA Isolation Kit (Santa Clara, CA, USA). cDNA was synthesized using the ProtoScript First Strand cDNA Synthesis Kit from New England BioLabs, Inc. (Ipswich, MA, USA). Endpoint (qualitative) RT-PCR was performed on cDNA, with gDNA template as a control for primer efficacy. In addition to the *MYB* primers, either *Actin* or *GAPDH* primers were included as a control for successful cDNA synthesis (Table S1). PCRs were performed with 0.2 mM dNTPs, 0.2 uM of each primer, 0.2 uL of G-Biosciences Taq DNA Polymerase per 25-uL reaction, and 1x G-Biosciences buffer. Amplification was performed with temperature settings of 95C for 3 min, followed by thirty cycles of (95C for 30s, variable temperature for 30s, 72C for 1 minute per kb of product), and then 72C for 10 min. The annealing

temperature was set to 2C lower than the lowest melting temperature of the set of primers used in the PCR, and the minimum extension time used was 30s.

Quantitative RT-PCR was performed on *MYB5a* and *MYB5b* using SYBR-Green Brilliant III Ultra-Fast reagents (Agilent Technologies, USA), in optical 96-well plates (Greiner Bio-One, Belgium), on an MxPro3000p analyzer (Stratagene, USA). Four biological replicates were used for each taxon and tissue type, collected from different plants of the same inbred line. Each biological replicate was run in triplicate and the average of the three technical replicates was used for statistical analyses. Samples were amplified for 40 cycles of 95°C for 10 s and 51°C for 20 s. Melt curves were obtained by heating from 51°C to 95°C with a ramp speed of 0.01°C per second. The *Actin* gene was used as a normalizer. Raw qPCR fluorescence data were collected and analyzed by the default settings of the MxPro software v.4.10 (Agilent Technologies, USA). Amplification efficiencies for each primer pair were determined using the Ct (threshold) values obtained from a 1/4 dilution series (1:4, 1:16, 1:64, 1:256, and 1:1024).

### Cloning and sequencing *MYB5a* splice variants

Two splice variants of *M. l. variegatus MYB5a*, containing exons 1-2-3 and 1-2-4 respectively, were PCR-amplified using primers MYB5a-10F and MYB5a-53R (Table S1). PCR products were purified using a Genomic DNA Clean and Concentrate Kit (Zymo Research, Irvine, CA, USA), then cloned using the pGEM T-Easy kit and manufacturer's protocol (Promega, Madison, WI, USA). pGEM vector containing the desired PCR product was transformed into competent JM109 *E.coli* cells (Promega, Madison, WI, USA). Colonies were evaluated using blue-white screening and PCR with M13 universal primers. Inserts of the expected length were sent to Eton Bioscience (San Diego, CA, USA) for Sanger sequencing.

### Transgene construction

To build transgenes using the Gateway method [27, 28], each fragment of interest was PCR-amplified using a forward primer with a 5'-CACC tag. The tag permits the fragment to be directionally cloned into a pENTR entry vector (Thermo Fisher Scientific, Waltham, MA, USA); attL/attR recombination is used to transfer the correctly oriented fragment into a Gateway-compatible destination vector.

Genomic DNA for PCR was extracted using the E.Z.N.A. SP Plant DNA Kit (Omega Bio-Tek, Norcross, GA, USA). PCR amplification was performed using Phusion High Fidelity DNA Polymerase (New England Biolabs).

Two RNAi constructs were built, targeting the 5'UTR and fourth exon respectively of *M. l. variegatus MYB5a*, with pB7GWIWG2(I) (VIB, Ghent, Belgium) as the destination vector. The inserts and primers used for transgene construction are summarized in Table 2. A previously-built overexpression construct [15], containing the complete *NEGAN* coding sequence from *M. lewisii*, driven by a 35S promoter, was also utilized.

### Stable transformation

Agrobacterium-mediated plant transformation was performed using floral spray and vacuum infiltration as described in [7]. Each experiment utilized approximately 12 robustly budding two- to six-month-old plants growing in 6" pots. The commercial *Agrobacterium tumefaciens* strain LBA4404 (ThermoFisher Scientific) produced only two transformed seedlings from the infiltration of 67 plants (K. Om, senior thesis 2017). Subsequent experiments were performed using strain GV3101, and this yielded higher rates of transformed seedlings.

**Table 2. Construction of *MYB5a*/*NEGAN* transgenes.**

| Insert                                  | Insert length | Primers                                                     |
|-----------------------------------------|---------------|-------------------------------------------------------------|
| <i>M. l. variegatus</i> 5'UTR fragment  | 307 bp        | 24F: caccCAAATTTTGGTTTTTGCCATTT<br>37R: TCGGTCAAATTAATGCACA |
| <i>M. l. variegatus</i> exon 4 fragment | 377 bp        | 60F: caccGAAGAACGGCCAACGAC<br>56R: GCAGCTTCCCCGTTTCA        |

Both inserts were cloned into the pB7GWIWG2(I) RNAi vector. Primers are labeled with a number and F for Forward or R for Reverse. Their sequences are shown 5' to 3'. Nucleotides added to primers for purposes of directional cloning or restriction enzyme digests are underlined. bp, base pairs. Lowercase cacc- represents nucleotides added to primers to enable cloning into the pENTR entry vector.

The concentration of Silwet-L77 (Lehle Seeds, Round Rock TX, USA) used by Yuan et al. [7] was 0.1%, or 1 mL per L of *Agrobacterium* culture. This unusually high concentration of Silwet was previously found to increase transformation success in *Mimulus* (Y.-W. Yuan, unpubl. data). Acetosyringone was added to a final concentration of 0.1 M as in [7].

The predominantly-outcrossing taxa *M. l. luteus* and *M. l. variegatus* were manually self-pollinated for two weeks after the first post-infiltration flower opened. Seeds were collected and densely sown in 25 x 50 –cm flats. As soon as germination was observed, flats were sprayed daily with 1:1000 Finale (Farnam Companies, Inc., Phoenix, AZ) to eliminate non-transgenic plants. Transgenic seedlings were grown to flowering and photographed. gDNA was extracted and the presence of the transgene was verified by PCR, using a forward primer targeted to the transgene and a reverse primer targeted to the attR2 region of the transgenic plasmid (Table 2, Table S1).

RNA extractions, cDNA synthesis, and endpoint RT-PCR were performed as described in the Expression Analyses section, to evaluate the expression of the target gene relative to an untransformed control plant. Two different primer pairs targeting *MYB5a* were used, 33F-40R and 44F-45R, along with primers to reference gene *GAPDH* [29] as a positive control (Table S1).

## RNA extraction and library preparation for RNAseq

Petal tissue for transcriptome analysis was collected separately from three individuals of our highly inbred wild-type line of *M. l. variegatus*, RC6, and from three white-flowered offspring (Vrnai1.1, 1.3, and 1.5; Fig. S2) of the white-flowered RNAi transformant Vrnai1. For comparative purposes, one sample from *M. naiandinus* developing petals was also included.

Because the expression of anthocyanin-producing genes in *Mimulus* flowers is highest early in bud development, just before and after the first appearance of visible anthocyanin pigment [23, 15], we used young buds that had not yet emerged from the calyx. Anthers were removed and the remaining petal tissue (including both lobe and nectar guide regions) was snap frozen in liquid nitrogen. RNA was extracted from each of the six samples using the Agilent Plant RNA Isolation Kit (Wilmington, DE, USA). A stranded RNA-Seq plus Ribo-Zero library preparation, followed by one lane of Illumina HiSeq 4000 50-bp single-read sequencing, was performed by the Duke University sequencing core facility (Durham, NC).

## Transcriptome alignment

With a published *Mimulus luteus* var. *luteus* genome and gene feature annotation file available [26], we chose the genome splice-aware mapping approach to assemble the *M. luteus* var. *variegatus* transcriptomes to the *M. l. luteus* genome [30, 31]. Sequencing

quality control was performed by plotting the sequence nucleotide distribution and sequencing quality scores for all samples. The transcriptome libraries were aligned using Bowtie2 (Version 2.3.5.1) under -very-sensitive-local mode [32] for best results in distinguishing homeolog expression, given that the *M. luteus*-group species are putative tetraploids [24, 33]. Overall alignment rates were greater than 90% for all 7 samples. From the sequence alignment maps we counted reads per gene for all samples using the exon coordinates included in the published luteus GFF (general feature format) file. Read count was performed with software HT-seq (Version 0.11.2) [34] in Python. For detailed alignment documents see the supplemental data. Pipeline code, alignment documents and results are accessible through the GitHub repository (<https://github.com/cici-xingyu-zheng/Luteus-RNA-seq>) and for raw read count see Table S2.

## Transcriptome analysis and functional annotation

Analyses of differential gene expression were conducted in DESeq2 (Version 1.26.0) in the R/Bioconductor environment [35] (R Version 3.6.2; Bioconductor Release 3.10). After normalizing each gene by sequencing depth, we performed a principal component analysis (PCA) plot of the seven transcriptome samples (three wild-type *M. l. variegatus*, three *M. l. variegatus* from RNAi line Vrnai1, and *M. naiandinus* as an outgroup). As expected, the samples clustered by treatment with the outgroup being an outlier (Fig. S2).

After performing a shrinkage estimation for dispersion to address the inaccuracy introduced by the small sample size and reduce the false positive rate [35], the logarithmic fold change (LFC) between RNAi treatment and control samples was used to evaluate differential expression. Following a false discovery rate control using the Benjamini-Hochberg Correction method, transcripts that were log-2-fold up or down-regulated with a p-Value < .05 were considered to be significantly differentially expressed. Transcript expression profiles were normalized to Reads Per Kilobase Per Million (RPKM) for further analysis and for plotting (Table S3).

To annotate differentially expressed genes, all of the *M. l. luteus* gene sequences were translated to protein sequences using EMBOSS(6.5.7) “transeq” command and searched against *Arabidopsis thaliana* (TAIR) protein database ([www.arabidopsis.org](http://www.arabidopsis.org)) using the “BLASTp” query with a e-value cut-off <  $10^{-6}$ . Coding sequences for *M. l. luteus* were released by Edger et al. [26] along with the draft genome and can be accessed at <https://datadryad.org/stash/dataset/doi:10.5061/dryad.d4vr0>. For each coding sequence from the *M. l. luteus* genome, the best-hit *A. thaliana* gene was used to annotate the transcript with a gene name and Gene Ontology (GO) annotation terms.

These annotations were then applied to the *M. l. variegatus* transcriptome data. GO enrichment analysis was conducted, for genes that were differentially expressed between wild-type *M. l. variegatus* and the *MYB5a* RNAi line Vrnai1, using topGO (Version 2.36.0) with the “org.At.tair.db” database in R. Pathway enrichment tests were done using the KEGG (the Kyoto Encyclopedia of Genes and Genomes, <https://www.genome.jp/kegg/>; Release 93.0) pathway assignments for Arabidopsis with the KEGGREST Bioconductor package [36].

## Regulatory and pathway analysis

In order to test for an effect of *MYB5a* downregulation on the anthocyanin biosynthetic pathway, we examined the expression of genes corresponding to six core pathway enzymes that produce the cyanidin pigment found in *M. l. variegatus* [19]. These are: chalcone synthase (CHS), chalcone isomerase (CHI), flavonoid-3-hydroxylase (F3H), dihydroflavonol-4-reductase (DFR), anthocyanidin synthase (ANS), and

UDP-flavonoid-3-glucosyl-transferase (UF3GT) [37, 38]. A list of *M. l. variegatus* transcripts with *RPKM* > 1 and annotated with descriptions matching these enzymatic activities was obtained. Genes were considered truly orthogonal if they were the best hit in a reciprocal BLAST or had the same high BLAST score as a putative homeolog.

In addition to the enzyme-encoding genes, we were also interested in what other regulatory factors might be affected when we knock down the *MYB5a* transcriptional activator. In all species that have been examined, the regulatory complexes of the anthocyanin pathway include members of the MYB, basic helix-loop-helix (bHLH), and WD40 repeat families [39, 40]. Therefore, we subset from the differentially expressed genes a list of genes annotated as members of these three transcriptional regulator families. We searched within this subset for homologs to genes in *M. guttatus* and *M. lewisii* that have been reported to be involved in anthocyanin regulation.

## Results and Discussion

### Expression of an alternately spliced R2R3 MYB, *MYB5a/NEGAN*, covaries with petal anthocyanin

In *M. l. variegatus*, only two anthocyanin-related genes were found within the genetically mapped petal anthocyanin locus [23]. The two genes, *MYB4* and *MYB5a*, both grouped phylogenetically with the anthocyanin-activating Subgroup 6 of the R2R3 MYB gene family [41, 23]. Reciprocal BLAST searches of the *M. lewisii* genome indicate that *MYB5a* is the homolog of *NEGAN*, a gene shown to be responsible for nectar guide anthocyanin spots in *Mimulus lewisii* [15].

The Subgroup 6 R2R3 MYBs generally have three exons. The diagnostic Subgroup 6 amino acid motif is KPRPR[S/T]F in *Arabidopsis*, and it is located in the third exon [41]. In both *M. l. luteus* and *M. l. variegatus*, however, *MYB5a* genomic sequence data revealed the presence of a fourth exon that is extremely similar in sequence to the third exon. In both taxa, this fourth exon appears to be intact and potentially functional, including the Subgroup 6 motif. The third exon, although apparently intact in *M. l. luteus*, has a 26-bp frameshift-inducing deletion in *M. l. variegatus* that eliminates the critical Subgroup 6 domain and creates a premature stop codon (Fig. 1A).

*MYB4*, while somewhat similar in sequence to *MYB5a/NEGAN*, has a nonconservative amino acid substitution in the functionally critical DNA-binding motif that is a hallmark of Subgroup 6 transcription factors (Fig. 1A) and has a top BLAST hit on NCBI to *M. guttatus* LOC105953416, which encodes a GL1-like trichome differentiation protein. Additionally, unsuccessful efforts to amplify *MYB4* out of *M. l. variegatus* floral bud cDNA, using primers that successfully amplify the gene from gDNA, indicate that this gene is not detectably expressed in developing *M. l. variegatus* buds (Fig. S1). Consistent with its similarity to a trichome differentiation gene, we did detect expression of *MYB4* in leaf tissue (Fig. S1).

In contrast, quantitative RT-PCR revealed that *MYB5a/NEGAN* is strongly and specifically expressed in the anthocyanin-pigmented petal lobes of *M. l. variegatus*, while showing little to no expression in the non-anthocyanin-pigmented petal lobes of *M. l. luteus* (Fig. 1B). Expression of *MYB5a/NEGAN* was modest in the anthocyanin-pigmented nectar guide tissue of both taxa, and undetectable in their leaf tissue (Fig. 1B). The homeologous gene copy, *MYB5b*, showed consistently low expression across both taxa and all tissue types, at levels less than 10% of that observed in *M. l. variegatus* petal lobes (Fig. 1B).

Two alternate splice variants of *MYB5a* were discovered, via RT-PCR followed by cloning and Sanger sequencing. An “exon 1-2-3” transcript was occasionally isolated from developing *M. l. variegatus* petals, but was never found in *M. l. luteus*, even in the



anthocyanin-pigmented nectar guides. An “exon 1-2-4” transcript was reliably isolated from *M. l. variegatus* petal lobes and from the spotted nectar guide tissue of the corolla throat. In *M. l. luteus*, the exon 1-2-4 transcript was recovered from nectar guides but not from the (anthocyanin-free) petal lobe tissue. Thus, the exon 1-2-4 transcript of *MYB5a* appears to be consistently expressed in all anthocyanin-pigmented floral tissue, and absent from tissue that lacks anthocyanin.

### ***MYB5a/NEGAN* is sufficient and necessary for petal anthocyanin in *M. l. variegatus***

A pilot experiment showed that *NEGAN* from *M. lewisii*, when overexpressed with the 35S promoter, was sufficient to activate anthocyanin production in both leaf and petal tissue of the normally yellow-flowered *M. l. luteus* (Fig. 2A). Anthocyanin pigmentation in the nectar guide region was also dramatically increased relative to wild-type (Fig. 2A). Encouraged by this result, we used a 35S-driven RNAi transgene to test the hypothesis that the exon 1-2-4 transcript of *MYB5a* is necessary for petal lobe anthocyanin pigmentation in *M. l. variegatus*. In the strongest line, “Vrnai1,” anthocyanin pigmentation was completely abolished in both the petal lobe and the nectar guide (Fig. 2B). Anthocyanin pigmentation in the stems, the leaves, and the adaxial side of the corolla appeared to be unaffected, indicating that the effect of *MYB5a* knockdown is spatially specific. Successful knockdown of *MYB5a* in line Vrnai1 was demonstrated via qualitative RT-PCR (Fig. 2C), and confirmed through transcriptome analysis (next section).

Considerable variation in the severity of the RNAi phenotype was observed across different transgenic lines, as is typical for this technique (Fig. 3). From 12 wild-type *M. l. variegatus* transformed with RNAi targeting exon 4 of *MYB5a*, six putatively transgenic seedlings were obtained. Four of these (Vrnai1, Vrnai3, Vrnai5, Vrnai7) had a visible reduction in petal lobe anthocyanin pigmentation. From an additional 12 wild-type *M. l. variegatus* transformed with RNAi targeting the 5’UTR of *MYB5a*, two putatively transgenic seedlings were obtained. One of these (Vrnai6) had a visible reduction in petal lobe anthocyanin pigmentation. Genotyping confirmed the presence of the RNAi transgene in all eight lines (Supp Fig.s: Genotyping gels). In line Vrnai6, the RNAi phenotype declined over the lifetime of the plant (Fig. 3). This phenomenon has been shown to be caused by methylation and epigenetic silencing, particularly of the 35S promoter, in both *Arabidopsis thaliana* and the tobacco species *Nicotiana attenuata* [42, 43, 44].

The Vrnai1 plant was self-fertilized, and eight of the resulting seeds were planted and grown to flowering. As expected for a single-copy (heterozygous) insertion of a dominantly-acting transgene in the Vrnai1 plant, we observed a 3:1 ratio of six white-flowered and two wild-type plants among the offspring (Fig. S2). The six white-flowered offspring exhibited slight anthocyanin mottling on some flowers (Fig. S2).

### **Transcriptomic differences between wild-type and RNAi lines of *M. l. variegatus***

We found a total of 632 genes that were significantly differentially expressed between wild-type and Vrnai1 lines of *M. l. variegatus*, with 346 genes down-regulated and 290 up-regulated (Table S4). The differentially expressed genes are enriched in a variety of functions including response to UV-B, anthocyanin-containing compound biosynthesis, pollen exine formation and phenylpropanoid biosynthetic process (p-value < .001) (Table S5). A pathway enrichment analysis identified two significantly enriched pathways (Table S6): (1) cutin, suberine and wax biosynthesis, and (2) flavonoid

biosynthesis, which includes the anthocyanin biosynthetic pathway [37]. 347

The *M. l. variegatus MYB5a* DNA sequence, which had previously been determined 348  
by PCR and Sanger sequencing, had best hits to three coding sequences in *M. l. luteus*: 349  
Mlu 12200, Mlu 12207, and Mlu 42095. In the *M. l. variegatus* transcriptomes, the 350  
latter two transcripts were not expressed at all in either wild-type or RNAi lines of *M. l.* 351  
*variegatus*. In contrast, Mlu 12200 was robustly expressed in all six libraries, with 352  
three-fold higher expression in the wild-type compared to the *MYB5a* RNAi line (Fig. 353  
4A). The Mlu 12200 transcript from *M. l. variegatus* also had a best match to the gene 354  
that is annotated as *MYB5a* in the *M. l. luteus* genome, [23, 26], further confirming its 355  
identity as the target of our RNAi experiment. 356

To check for off-target effects of the RNAi transgene, we asked whether any other 357  
Subgroup 6 R2R3 MYB genes were significantly down-regulated in the RNAi line. Five 358  
MYBs were identified among the down-regulated genes (Mlu 24690, Mlu 05348, Mlu 359  
27563, Mlu 17841, and Mlu 00921), but none of them contained a Subgroup 6 motif. We 360  
conclude that the loss-of-pigment phenotype observed in line Vrnai1 is due to the 361  
reduction in *MYB5a* expression alone, and was not caused by incidental 362  
down-regulation of another anthocyanin-activating MYB gene. 363

## RNAi knockdown of *MYB5a* reduces transcription of the late 364 anthocyanin biosynthesis genes 365

We identified a total of 30 genes that are annotated to have enzymatic functions 366  
corresponding to the six core enzymes in the cyanidin pathway [37] (Table S7). The 367  
Early Biosynthetic Genes (*CHS*, *CHI* and *F3H*) are particularly enriched in copy 368  
number, each having more than the two homeologous copies expected in a tetraploid. 369

In eudicots, the anthocyanin biosynthetic genes are usually divided into two groups, 370  
the early (EBGs) and late (LBGs) biosynthetic genes, with the latter being tightly 371  
regulated by an MBW complex [1, 2, 3, 4, 5, 6]. In Arabidopsis, *CHS*, *CHI*, and *F3H* 372  
belong to the EBGs, producing the precursors of not only flavonoid pigments but other 373  
flavonol compounds. *DFR*, *ANS*, and *UF3GT* comprise the LBGs. Conserved as the 374  
enzymatic pathway is, however, the break point of regulation between early and late 375  
genes can vary across species [45]. We utilized our transcriptomic data to determine 376  
where the breakpoint occurs in *M. l. variegatus*. 377

Consistent with expectations from the literature, the anthocyanin biosynthetic genes 378  
in *M. l. variegatus* show a dichotomous pattern of response to *MYB5a* down-regulation. 379  
The genes earlier in the pathway - *CHS*, *CHI*, and *F3H* - had no consistent pattern of 380  
expression change (Fig. 4B, S4), while the genes later in the pathway - *DFR*, *ANS*, and 381  
*UF3GT* - were consistently down-regulated (Fig. 4B, S5). All copies of the LBGs had 382  
statistically significant change in the same direction (lower expression in the *MYB5a* 383  
RNAi line relative to wild-type), while the multiple copies of the EBGs showed a mix of 384  
expression increase, decrease, and no change in the RNAi line. Our data suggest that 385  
*MYB5a* controls anthocyanin production by regulating primarily the late biosynthetic 386  
genes, which include *DFR*, *ANS*, and *UF3GT*. This conclusion is consistent with the 387  
proposed mechanism of anthocyanin pathway regulation in the congeneric *M.* 388  
*aurantiacus* [17]. 389

## RNAi knockdown of *MYB5a* reduces transcription of other 390 anthocyanin regulators 391

Within the list of differentially expressed genes, we identified 20 genes that are 392  
annotated to be transcription factors with MYB or helix-loop-helix (HLH) domains, or 393  
that encode a WD40 protein that could potentially belong to a MYB-bHLH-WD40 394

regulatory complex (Table S8). Since different MBW complexes regulate a variety of traits besides anthocyanin synthesis, we further examined these candidates to identify the most likely homologs of anthocyanin-specific MBW components. BLAST results indicate that one WD40 gene (labeled *MlutWD40a*) and two bHLH genes (*MlutbHLH1* and *MlutbHLH2*) have high sequence similarity to anthocyanin *TTG1* and *TT8* genes, which are the main WD40 and bHLH regulators respectively of proanthocyanidin biosynthesis in Arabidopsis seed [6]. *MlutWD40a* appears to be an ortholog of *MLWD40a* from *M. lewisii*, which has been shown to co-activate anthocyanin expression in the corolla [15]. Interestingly, the two bHLH co-factors have the highest similarity to *M. lewisii* *ANbHLH3*. In *M. lewisii*, this gene is not detectably expressed in the petal lobes [15], suggesting a functional diversification in the bHLH co-factors as well as in *MYB5a/NEGAN*.

Recent studies show that single-repeat R3 MYBs are activated by the R2R3 MYB member of the MBW complex, and inhibit anthocyanin biosynthesis by directly interacting with the bHLH component of the same complex [46, 7]. We found that two R3 MYB genes, Mlu 13044 (*MlutR3MYB1*) and Mlu 33990 (*MlutR3MYB2*), have high sequence similarity to *RTO* from *M. lewisii* [47] and are strongly and significantly down-regulated in the *MYB5a* RNAi line. Their downregulation in *Vrnai1* is consistent with the model that *MYB5a* is an activator of its own inhibitor, although the impact of *MYB5a* on two apparently homeologous gene copies is unique.

We were particularly interested in the expression change of these five anthocyanin related regulators when knocking down *MYB5a*. In previous studies, the R2R3 MYB protein has been shown to activate the complex as well as the R3 inhibitor, and we hypothesized that in *M. l. variegatus* RNAi lines, the other candidate anthocyanin regulators we identified would show the same directional expression change as *MYB5a* [48]. Indeed, our expression results showed that down regulating *MYB5a* in the RNAi line of *M. l. variegatus* led to a down regulation in all the putative regulatory genes, highlighting the critical role that *MYB5a* plays in the MBW regulatory complex (Fig. 5). The activators of anthocyanin biosynthesis - including R2R3 MYB, bHLH, and WD40 transcription factors - were all 2- to 3-fold down-regulated in the RNAi line (Fig. 5). The two R3 MYB inhibitors showed much more dramatic effects: they were 19- and 29-fold down-regulated (Fig. 5). High sensitivity of the R3 MYB inhibitors to *MYB5a* expression may be a key feature of the anthocyanin regulatory network.

## Conclusions

Here we demonstrate that *MYB5a* is both sufficient and necessary for the evolutionarily recent gain of petal lobe anthocyanin in the purple-flowered *Mimulus luteus* var. *variegatus*. We identify an unusual four-exon structure to this Subgroup 6 R2R3 MYB, along with evidence for alternative splicing. While the role of coding versus *cis*-regulatory evolution was not explicitly examined in this paper, we found that patterns of expression of *MYB5a* corresponded to pigmentation: the gene was strongly expressed in the heavily anthocyanin-pigmented petal lobes of *M. l. variegatus*; not detectably expressed in the petal lobes of *M. l. luteus*, a conspecific which lacks petal lobe anthocyanin; and modestly expressed in the partly-pigmented nectar guides of both taxa. Further supporting the importance of expression change rather than coding change is that the homologous coding sequence from the evolutionarily distant *M. lewisii*, which is approximately 20 MY divergent from *M. l. variegatus* [14], was highly effective at activating anthocyanin in the normally yellow-flowered *M. l. luteus*. Additional transgenic experiments, such as promoter swaps, will be helpful in testing the impact of coding versus *cis*-regulatory evolution on the functional divergence of *MYB5a* in *M. l. variegatus*.

Our transgenic experiments indicate that *MYB5a* is responsible for anthocyanin pigmentation in two distinct regions of the *M. l. variegatus* corolla: the petal lobe and the nectar guide. The role of *MYB5a/NEGAN* in nectar guide spotting appears to be conserved across much of the genus. In contrast, the deployment of *MYB5a/NEGAN* to the petal lobes has not, to our knowledge, been previously reported. Rather, ancient paralogs of *MYB5a/NEGAN* appear to be responsible for petal lobe anthocyanin in diverse species including *M. lewisii*, *M. aurantiacus*, *M. cupreus*, and *M. naiandinus* [23, 15, 17, 49].

Transcriptome analyses of an RNAi line of *M. l. variegatus* confirmed the targeted knockdown of *MYB5a*, and highlighted the inter-relatedness of expression patterns across the network of anthocyanin regulatory and biosynthetic genes. These results illustrate how the network can respond dynamically to expression changes of a single network component, creating an avenue for a relatively modest expression change - such as that caused by a single *cis*-regulatory mutation - to have a major effect on the transcriptome as well as on the ultimate phenotype.

## Figures

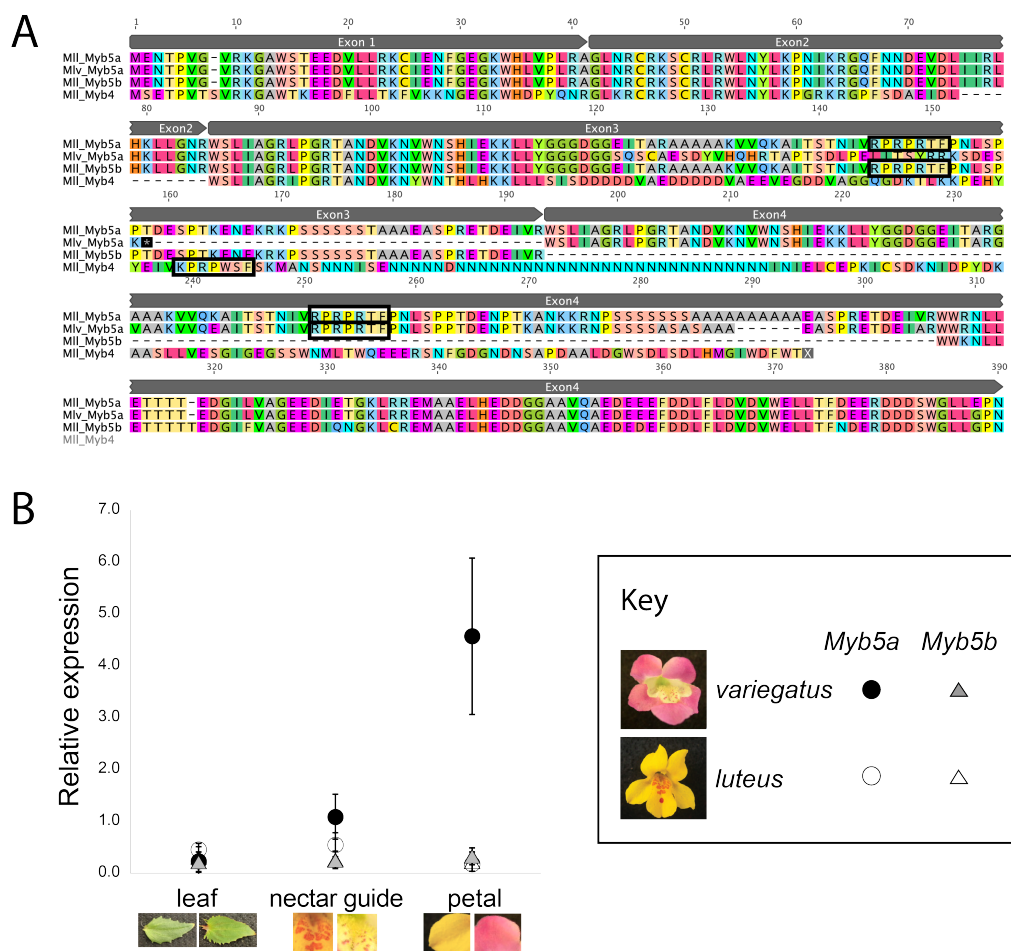

**Fig 1** Sequence and expression of *MYB5a/NEGAN*. A. Alignment of *MYB4*, *MYB5a*, and *MYB5b*. Amino acid sequences were inferred by translating DNA sequences, obtained from the *M. l. luteus* genome [26] and from PCR and Sanger sequencing of *M. l. variegatus*. Black rectangles identify putative Subgroup 6 motifs. Note that this motif, which strongly predicts ability to activate anthocyanin production, is missing from *M. l. variegatus* exon 3. Created in Geneious 9.1 by Biomatters ([www.geneious.com](http://www.geneious.com)). B. qRT-PCR estimates of *MYB5a/NEGAN* and *MYB5b* expression in *M. l. variegatus* and *M. l. luteus*. Each point indicates the mean of 3 technical replicates, +/-95%CI, relative to the reference gene *Actin* and a reference pool of cDNA.

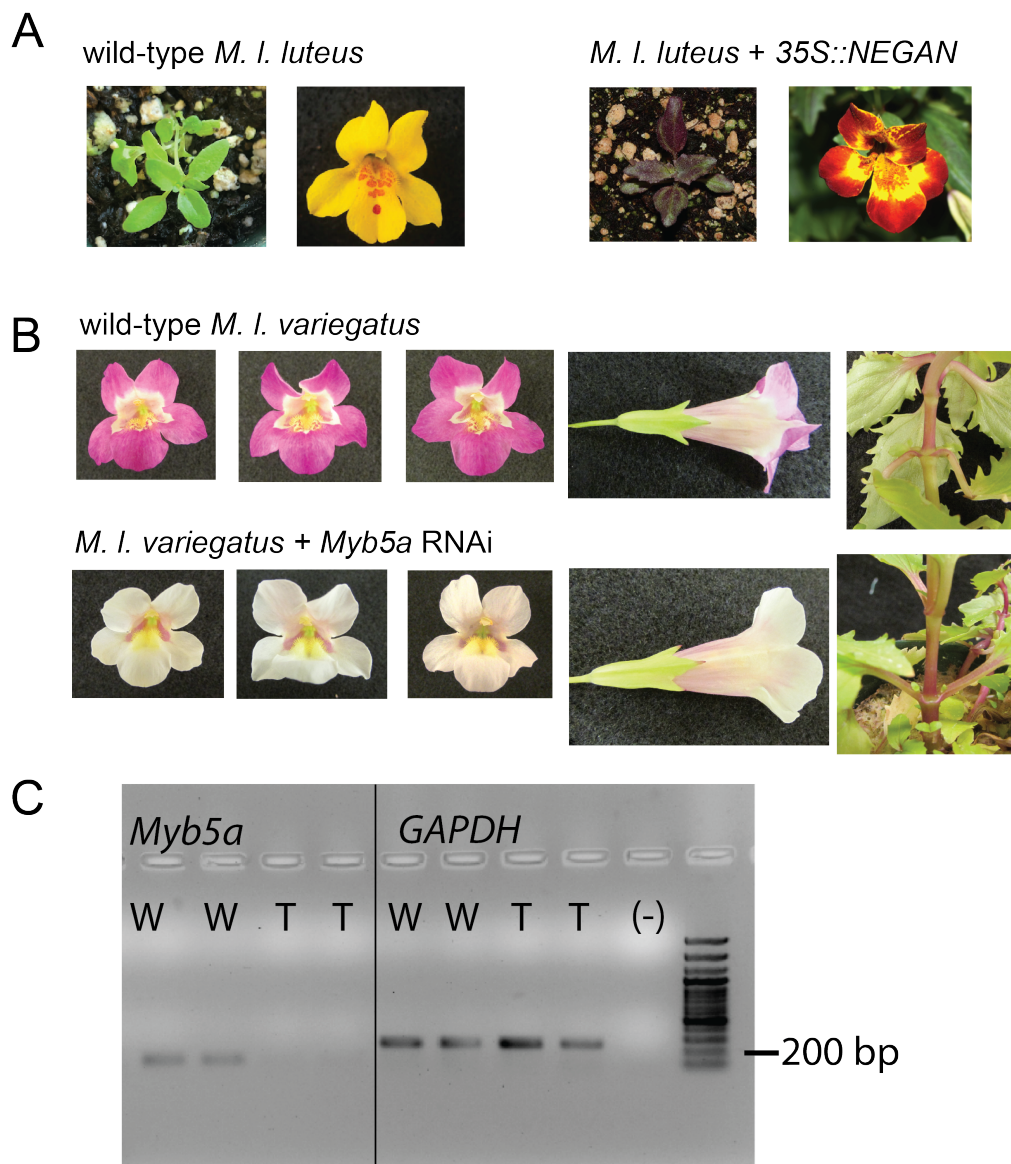

**Fig 2** *MYB5a/NEGAN* is sufficient and necessary for activation of petal lobe anthocyanins. A. Overexpression of the coding sequence of *MYB5a/NEGAN* from *M. lewisii* in the normally yellow-petaled *M. l. luteus* activates anthocyanin biosynthesis in both leaf and petal tissue. B. RNAi targeting *MYB5a* exon 4 in the normally purple-petaled *M. l. variegatus* eliminates anthocyanin biosynthesis in the petal lobes and nectar guides, but not elsewhere in the plant. The strongest of 8 RNAi lines, *Vrnai1*, is shown here. See Supplemental Data for images of the other RNAi lines. C. Qualitative (end-point) RT-PCR on cDNA from developing petal lobes of wild-type (W) and transgenic (T) *M. l. variegatus* reveals a reduction in *MYB5a* expression in the *Vrnai1* transgenic line. Reference gene *GAPDH* was used as a positive control.

473  
474  
475  
476  
477  
478  
479  
480  
481  
482

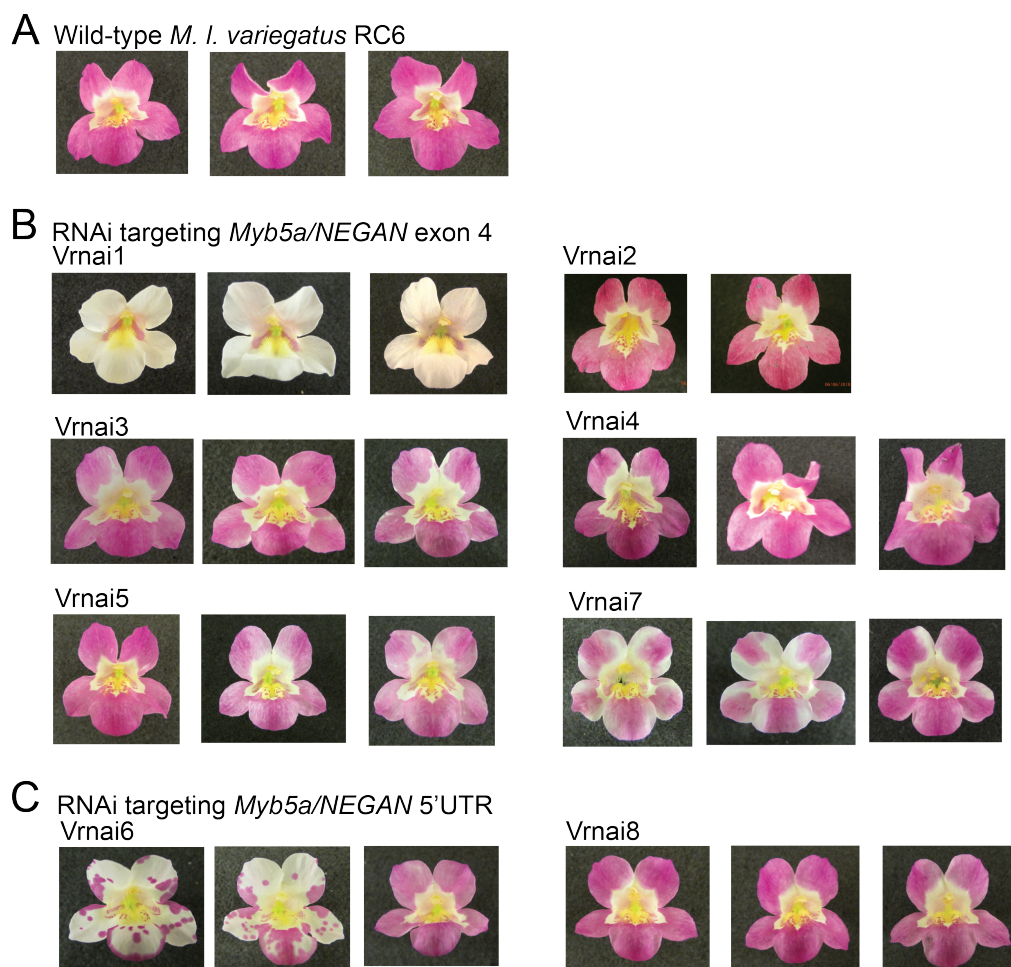

**Fig 3 Transgene effects vary between and within insertion lines.** A. Wild-type *M. l. variegatus*. B. Stable transgenic lines, for which the presence of an RNAi transgene targeting *MYB5a/NEGAN* exon 4 was confirmed by genotyping. C. Stable transgenic lines, for which the presence of an RNAi transgene targeting *MYB5a/NEGAN* 5'UTR was confirmed by genotyping.

483  
484  
485  
486  
487

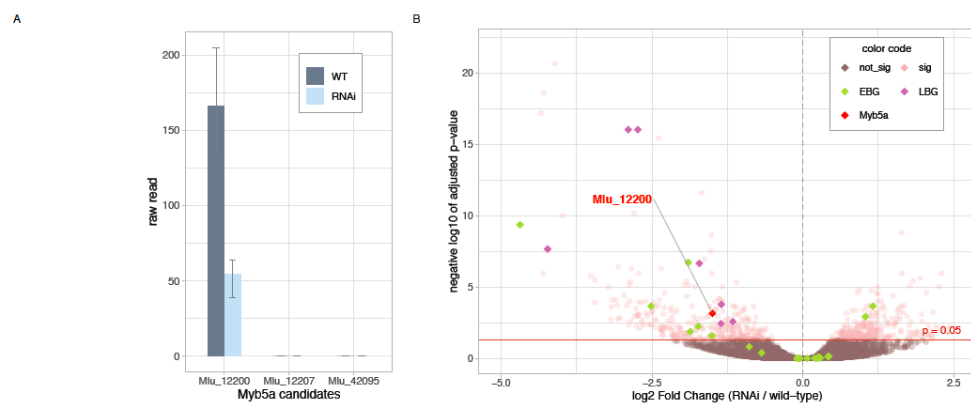

**Fig 4. RNAi knockdown of *MYB5a* (transcript Mlu 12200) results in coordinated downregulation of the Late Biosynthetic Genes in the anthocyanin biosynthesis pathway.** A. Experimental confirmation of the correspondence of transcript Mlu 12200 to *MYB5a*. Bars show the average read-count ( $n=3$ ) of wild-type and RNAi lines respectively, for candidate transcripts Mlu 12200, Mlu 12207, and Mlu 42095 from the RNA-seq Transcriptome Libraries. Upper and lower error bars mark the highest and lowest read counts; only Mlu 12200 had any mapped reads. B. Differentially expressed anthocyanin biosynthesis genes. Log-2 fold change in expression (Vrnai1 / wild-type) is shown on the x-axis, and negative log 10 of adjusted p-value in the y-axis. 30 structural genes were identified, with Early Biosynthetic Genes (EBGs) shown in green and Late Biosynthetic Genes (LBGs) in purple. Points in the upper left quadrant correspond to genes that are significantly down-regulated in the RNAi line relative to wild-type *M. l. variegatus*. sig, significant expression difference between Vrnai1 and wild-type; not sig, no significant difference.



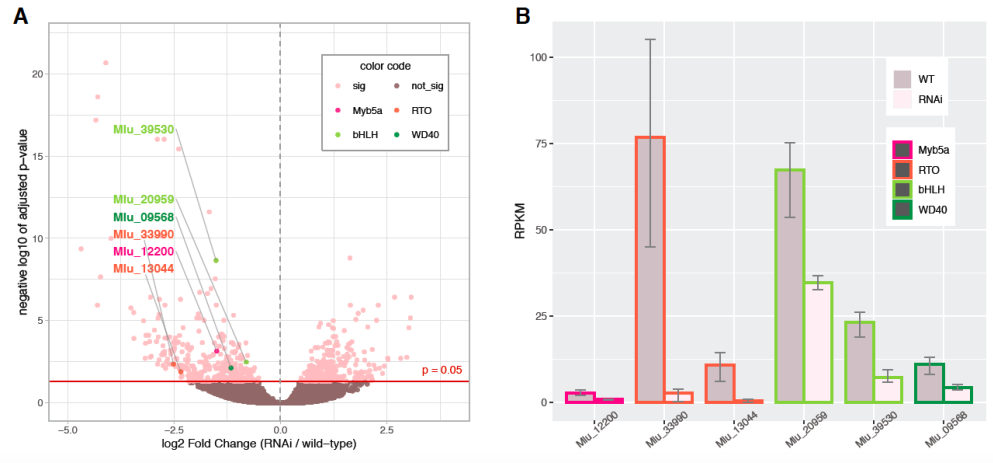

**Fig 5. RNAi knockdown of *MYB5a* results in downregulation of multiple other anthocyanin regulatory genes.** A. Expression of the regulatory complex genes relative to the transcriptome as a whole. Log-2 fold change in expression (Vrnai1 / wild-type) is shown on the x-axis and negative log<sub>10</sub> of adjusted p-value as the y-axis. Points in the upper left quadrant correspond to genes that are significantly down-regulated in the RNAi line relative to wild-type *M. l. variegatus*. Genes with homology to known anthocyanin-regulating genes are color-coded as *MYB5a* (pink); the R3 MYB repressor *RTO* (orange); bHLH (light green); or WD40 (dark green). sig, significant expression difference between Vrnai1 and wild-type; not sig, no significant difference. B. Transcript level fold change of the anthocyanin-regulating transcription factors. Normalized expression fold change of the regulatory genes is shown in RPKM (per million mapped reads). Upper and lower error bars represent maximum and minimum expression level among the samples (n=3).

## Supporting information

488

489

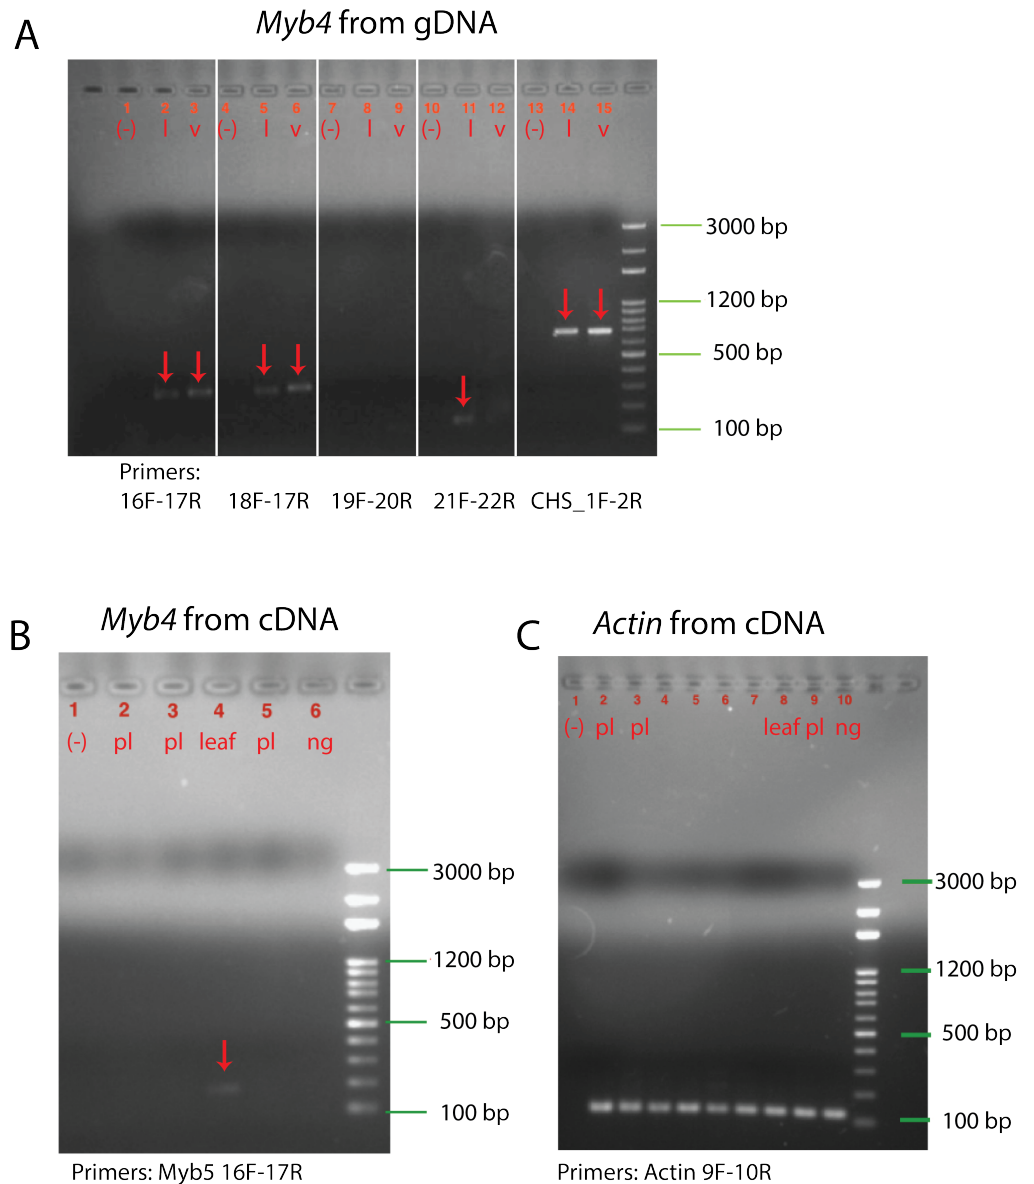

**S1 Fig. RT-PCR indicates a lack of *MYB4* expression in developing *M. l. variegatus* petal lobes.** A. *MYB4* primers 16F-17R and 18F-17R successfully amplify a *MYB4* fragment from *M. l. luteus* and *M. l. variegatus* genomic DNA. Expected lengths are 310 base pairs and 320 base pairs, respectively. (-), no-template control; l, *M. l. luteus*; v, *M. l. variegatus*. The *CHS* gene is included as a positive control; expected length is 650 base pairs. B. The *MYB4* 16F-17R primers amplify a *MYB4* fragment out of *M. l. variegatus* leaf cDNA, but not out of developing *M. l. variegatus* floral bud cDNA. Expected length from cDNA, for this intron-spanning primer pair, is 190 base pairs. (-), no-template control; pl, petal lobe; ng, nectar guide. C. The *Actin* reference gene was used as a positive control to verify cDNA quality. (-),

490

491

492

493

494

495

496

497

498

499

no-template control. The cDNA samples used in panel C are labeled as in panel B: pl (petal), leaf, or ng (nectar guide).

500  
501

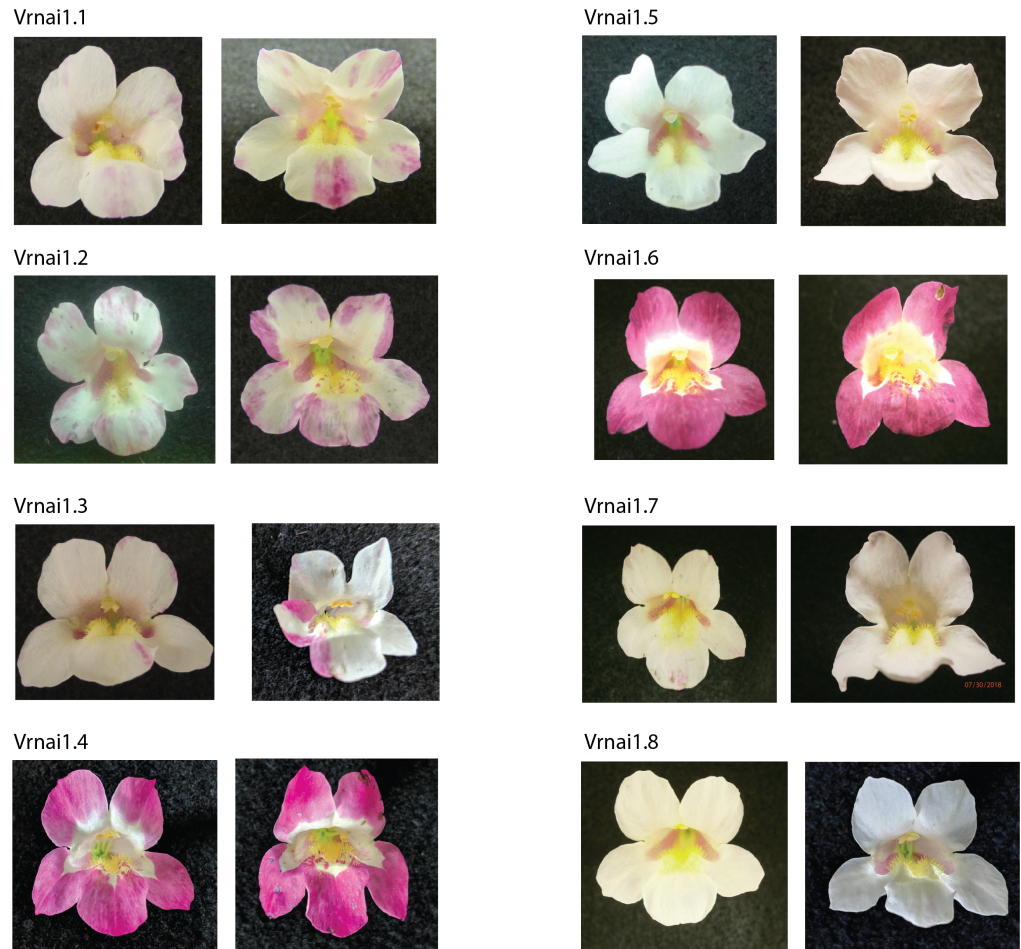

**S2 Fig. Offspring of line Vrnai1 show a 3:1 ratio of RNAi phenotype : wild-type, consistent with a single transgene insertion in Vrnai1. Eight seedlings were grown to flowering. Two flowers per plant are shown. Plants 1.1, 1.3, and 1.5 were used for RNA extraction and transcriptome sequencing.**

503  
504  
505  
506

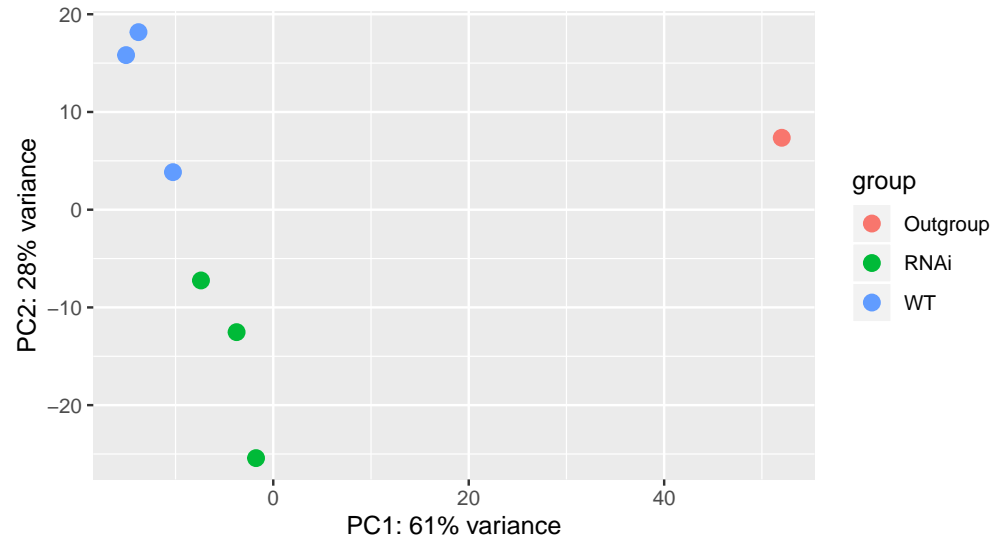

**S3 Fig. Principle components analysis illustrating transcriptome differences between *MYB5a* RNAi and wild-type *M. l. variegatus*.**

Unsupervised clustering of the 7 transcriptome libraries was performed using principle component analysis based on the differences between samples in normalized read count of all genes. The x and y axes represent the 1st and 2nd principal components.

508

509

510

511

512

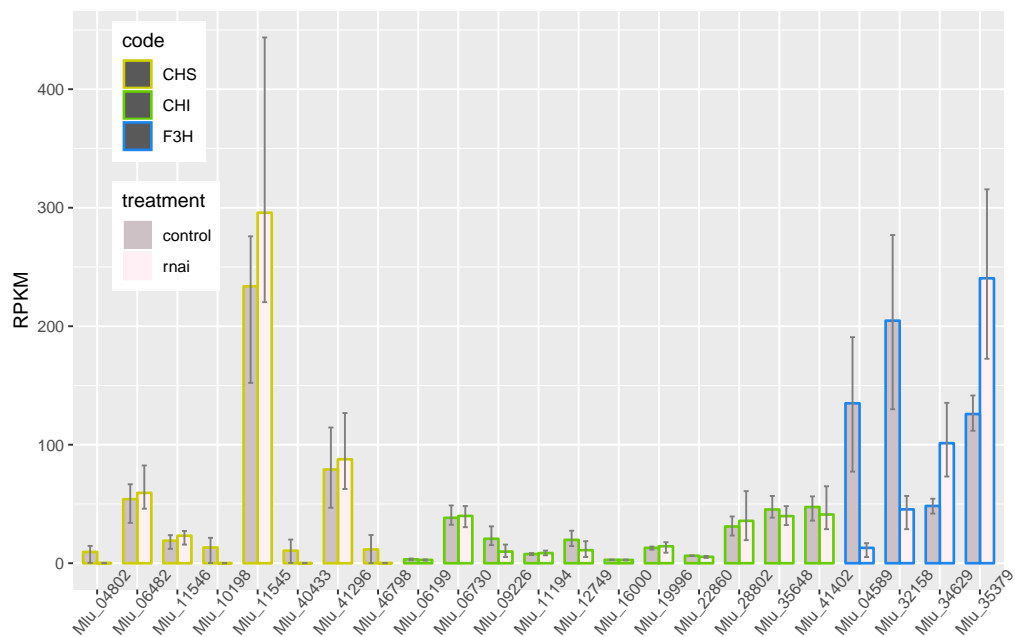

**S4 Fig. Transcript level of Early Biosynthetic Genes (EBGs) of the anthocyanin pathway in *MYB5a* RNAi line *Vrn11* compared to wild-type *M. l. variegatus*.** No consistent pattern in expression level is observed comparing the RNAi lines to the wild-type. The bars represent the average expression level, and upper and lower error bars represent maximum and minimum expression level among the samples (n=3). RPKM (per million mapped reads) is used as the normalized unit of transcript expression.

514  
515  
516  
517  
518  
519  
520

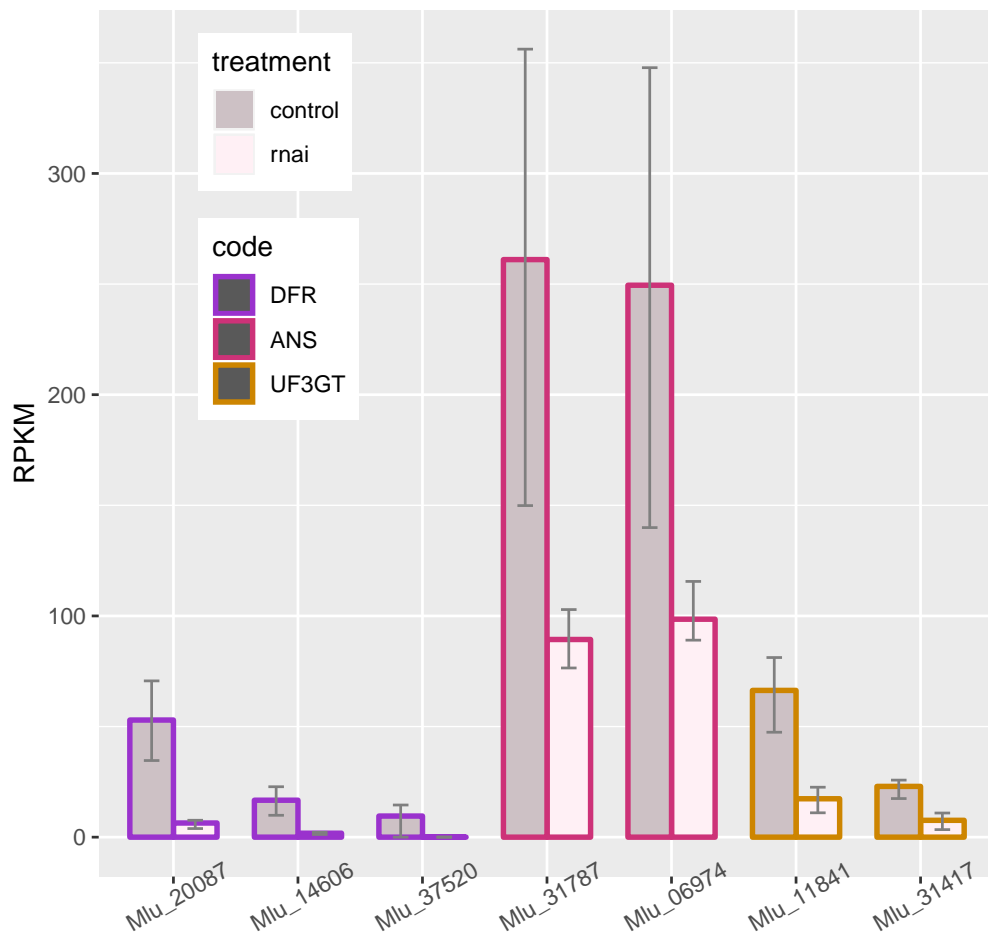

**S5 Fig. Transcript level of Late Biosynthetic Genes (LBGs) of the anthocyanin pathway in *MYB5a* RNAi line Vrnai1 compared to wild-type *M. l. variegatus*.** All genes identified as LBGs show a decreased expression in the RNAi line compared to the wild type. The bars represent the average expression level, and upper and lower error bars represent maximum and minimum expression level among the samples (n=3). RPKM (per million mapped reads) is used as the normalized unit of transcript expression.

**S1 Table. Primers used for qualitative and quantitative RT-PCR and transgene construction.** Primers are named by their target gene(s), an identification number, and "F" for forward primers or "R" for reverse primers.

**S2 Table. Raw read count of all transcriptome libraries from HTSeq.** S1 indicates the outgroup, *M. naiandinus*. S2-S4 are from the RNAi line Vrnai1, and S5-S7 are from wild-type *M. l. variegatus*.

**S3 Table. Normalized transcript expression level of all libraries in RPKM.** Mlv-wt, wild-type [untransformed] *M. l. variegatus* line RC6. Vrnai1, *MYB5a* RNAi

line 1. Mna, *M. naiandinus* line 105.

537

**S4 Table. Significantly differentially expressed genes from DESeq2 results.**

538

Result of all 632 differentially expressed genes from DESeq2 analysis, giving base means across samples, log2 fold changes, standard errors, test statistics, p-values and adjusted p-values.

539

540

541

**S5 Table. Significance of GO terms in the differentially expressed genes.**

542

First we did a classical enrichment analysis by testing the over-representation of GO terms within the group of differentially expressed genes (Fisher's Test) and then performed Kolmogorov-Smirnov test using the both the "classic" and the "elim" method. S5 gives a data frame containing the top GO terms identified by the elim algorithm with p-value cut of at .01.

543

544

545

546

547

**S6 Table. KEGG Pathway Enrichment Testing of the differentially expressed genes.**

548

We accessed KEGG pathway assignments for Arabidopsis through the KEGGREST Bioconductor package, and then applied Wilcoxon rank-sum test to each pathway for enrichment testing. Columns features pathway code, pathway name, the p value of being enriched and the number of annotated genes in the pathway.

549

550

551

552

**S7 Table. Forward and reciprocal BLAST results for anthocyanin pathway genes.**

553

The column "code" contains the short-hand annotation for the structural genes of the anthocyanin pathway; the column "blastp-besthit" shows the best hit in Arabidopsis; the column "rcp-blastp-besthit" shows the reciprocal results for each best-hit Arabidopsis genes. Genes are highlighted if the reciprocal BLAST identifies the same *M. l. luteus* gene.

554

555

556

557

558

**S8 Table. Forward and reciprocal BLAST results for regulatory genes.**

559

The column "code" contains the short-hand annotation for the potential regulatory genes of the anthocyanin pathway; the column "blastp-besthit" shows the best hit in Arabidopsis; the column "rcp-blastp-besthit" shows the reciprocal results for each best-hit Arabidopsis genes. Genes are highlighted if the reciprocal blast identifies the same *M. l. luteus* gene.

560

561

562

563

564

## Acknowledgments

565

The authors gratefully acknowledge assistance with molecular work from Baoqing Ding, Lauren Stanley, Rachel Eguía, Johanna Au, Jonah Rodewald, and Jeanette Schwensen. We thank Larry North for construction of a vacuum infiltration apparatus, Carter Cooke and Bella Rivera for greenhouse assistance, and Amy LaFountain and Qiaoshan Lin for assistance in obtaining transgenic seeds. This material is based upon work supported by the Murdock College Research Program for Life Sciences Award 2015270, NSF microMORPH training grant, and NSF-DEB Award 1655311, to AMC.

## References

1. Christian Dubos, Ralf Stracke, Erich Grotewold, Bernd Weisshaar, Cathie Martin, and Loïc Lepiniec. Myb transcription factors in arabidopsis. *Trends in plant science*, 15(10):573–581, 2010.



2. Katia Petroni and Chiara Tonelli. Recent advances on the regulation of anthocyanin synthesis in reproductive organs. *Plant science*, 181(3):219–229, 2011.
3. Cathie Martin and Tom Gerats. Control of pigment biosynthesis genes during petal development. *The Plant Cell*, 5(10):1253, 1993.
4. Alan Lloyd, Austen Brockman, Lyndsey Aguirre, Annabelle Campbell, Alex Bean, Araceli Cantero, and Antonio Gonzalez. Advances in the myb–bhlh–wd repeat (mbw) pigment regulatory model: addition of a wrky factor and co-option of an anthocyanin myb for betalain regulation. *Plant and Cell Physiology*, 58(9):1431–1441, 2017.
5. Loïc Lepiniec, Isabelle Debeaujon, Jean-Marc Routaboul, Antoine Baudry, Lucille Pourcel, Nathalie Nesi, and Michel Caboche. Genetics and biochemistry of seed flavonoids. *Annu. Rev. Plant Biol.*, 57:405–430, 2006.
6. Wenjia Xu, Damaris Grain, Sophie Bobet, José Le Gourrierec, Johanne Thévenin, Zsolt Kelemen, Loïc Lepiniec, and Christian Dubos. Complexity and robustness of the flavonoid transcriptional regulatory network revealed by comprehensive analyses of myb–bhlh–wdr complexes and their targets in a rabadopsis seed. *New phytologist*, 202(1):132–144, 2014.
7. Yao-Wu Yuan, Janelle M Sagawa, Riane C Young, Brian J Christensen, and Harvey D Bradshaw. Genetic dissection of a major anthocyanin qtl contributing to pollinator-mediated reproductive isolation between sister species of *Mimulus*. *Genetics*, 194(1):255–263, 2013.
8. Hui-Fen Zhu, Karen Fitzsimmons, Abha Khandelwal, and Robert G Kranz. Cpc, a single-repeat r3 myb, is a negative regulator of anthocyanin biosynthesis in arabidopsis. *Molecular plant*, 2(4):790–802, 2009.
9. Nick W Albert, Kevin M Davies, David H Lewis, Huaibi Zhang, Mirco Montefiori, Cyril Brendolise, Murray R Boase, Hanh Ngo, Paula E Jameson, and Kathy E Schwinn. A conserved network of transcriptional activators and repressors regulates anthocyanin pigmentation in eudicots. *The Plant Cell*, 26(3):962–980, 2014.
10. Matthew A Streisfeld and Mark D Rausher. Population genetics, pleiotropy, and the preferential fixation of mutations during adaptive evolution. *Evolution: International Journal of Organic Evolution*, 65(3):629–642, 2011.
11. James M Sobel and Matthew A Streisfeld. Flower color as a model system for studies of plant evo-devo. *Frontiers in plant science*, 4:321, 2013.
12. Alex D Twyford, Matthew A Streisfeld, David B Lowry, and Jannice Friedman. Genomic studies on the nature of species: adaptation and speciation in *Mimulus*. *Molecular ecology*, 24(11):2601–2609, 2015.
13. Yao-Wu Yuan. Monkeyflowers (mimulus): new model for plant developmental genetics and evo-devo. *New Phytologist*, 222(2):694–700, 2019.
14. Ze-Long Nie, Hang Sun, Paul M Beardsley, Richard G Olmstead, and Jun Wen. Evolution of biogeographic disjunction between eastern asia and eastern north america in phryma (phrymaceae). *American Journal of Botany*, 93(9):1343–1356, 2006.

15. Yao-Wu Yuan, Janelle M Sagawa, Laura Frost, James P Vela, and Harvey D Bradshaw Jr. Transcriptional control of floral anthocyanin pigmentation in monkeyflowers (*Mimulus*). *New Phytologist*, 204(4):1013–1027, 2014.
16. Alex D Twyford, Aaron M Caola, Pratibha Choudhary, Ramesh Raina, and Jannice Friedman. Loss of color pigmentation is maintained at high frequency in a monkey flower population. *The American Naturalist*, 191(1):135–145, 2018.
17. Matthew A Streisfeld, Wambui N Young, and James M Sobel. Divergent selection drives genetic differentiation in an r2r3-myb transcription factor that contributes to incipient speciation in *mimulus aurantiacus*. *PLoS genetics*, 9(3), 2013.
18. Dena L Grossenbacher and Justen B Whittall. Increased floral divergence in sympatric monkeyflowers. *Evolution: International Journal of Organic Evolution*, 65(9):2712–2718, 2011.
19. AM Cooley, Gastón Carvallo, and JH Willis. Is floral diversification associated with pollinator divergence? flower shape, flower colour and pollinator preference in chilean *Mimulus*. *Annals of Botany*, 101(5):641–650, 2008.
20. Adele Lewis Grant. A monograph of the genus *Mimulus*. *Annals of the Missouri Botanical Garden*, 11(2/3):99–388, 1924.
21. Rodrigo Medel, Carezza Botto-Mahan, and Mary Kalin-Arroyo. Pollinator-mediated selection on the nectar guide phenotype in the andean monkey flower, *Mimulus luteus*. *Ecology*, 84(7):1721–1732, 2003.
22. C Von Bohlen. El género *Mimulus* l.(scrophulariaceae) en chile. *Gayana Botanica*, 52:7–28, 1995.
23. Arielle M Cooley, Jennifer L Modliszewski, Megan L Rommel, and John H Willis. Gene duplication in *Mimulus* underlies parallel floral evolution via independent trans-regulatory changes. *Current Biology*, 21(8):700–704, 2011.
24. Barid B Mukherjee and Robert K Vickery. Chromosome counts in the section *simiolus* of the genus *mimulus* (scrophulariaceae). v. the chromosomal homologies of *m. guttatus* and its allied species and varieties. *Madrono*, 16(5):141–155, 1962.
25. Mario Vallejo-Marín, Richard JA Buggs, Arielle M Cooley, and Joshua R Puzey. Speciation by genome duplication: Repeated origins and genomic composition of the recently formed allopolyploid species *mimulus peregrinus*. *Evolution*, 69(6):1487–1500, 2015.
26. Patrick P Edger, Ronald Smith, Michael R McKain, Arielle M Cooley, Mario Vallejo-Marin, Yao-Wu Yuan, Adam J Bewick, Lexiang Ji, Adrian E Platts, Megan J Bowman, et al. Subgenome dominance in an interspecific hybrid, synthetic allopolyploid, and a 140-year-old naturally established neo-allopolyploid monkeyflower. *The Plant cell*, 29(9):2150–2167, 2017.
27. Federico Katzen. Gateway® recombinational cloning: a biological operating system. *Expert opinion on drug discovery*, 2(4):571–589, 2007.
28. Keith W Earley, Jeremy R Haag, Olga Pontes, Kristen Opper, Tom Juehne, Keming Song, and Craig S Pikaard. Gateway-compatible vectors for plant functional genomics and proteomics. *The Plant Journal*, 45(4):616–629, 2006.

29. Kimmy A Stanton, Patrick P Edger, Joshua R Puzey, Taliesin Kinser, Philip Cheng, Daniel M Vernon, Nancy R Forsthoefel, and Arielle M Cooley. A whole-transcriptome approach to evaluating reference genes for quantitative gene expression studies: A case study in *mimulus*. *G3: Genes, Genomes, Genetics*, 7(4):1085–1095, 2017.
30. Lincoln D Stein. An introduction to the informatics of “next-generation” sequencing. *Current protocols in bioinformatics*, 36(1):11–1, 2011.
31. Alexander G Williams, Sean Thomas, Stacia K Wyman, and Alisha K Holloway. Rna-seq data: challenges in and recommendations for experimental design and analysis. *Current protocols in human genetics*, 83(1):11–13, 2014.
32. Ben Langmead and Steven L Salzberg. Fast gapped-read alignment with bowtie 2. *Nature methods*, 9(4):357, 2012.
33. Robert K Vickery. Speciation by aneuploidy and polyploidy in *mimulus* (scrophulariaceae). *The Great Basin Naturalist*, 55(2):174–176, 1995.
34. S Anders, P Theodor, and W HTSeq Huber. A python framework to work with high-throughput sequencing data. *bioRxiv*. 2014.
35. Michael I Love, Wolfgang Huber, and Simon Anders. Moderated estimation of fold change and dispersion for rna-seq data with *DESeq2*. *Genome biology*, 15(12):550, 2014.
36. Minoru Kanehisa, Yoko Sato, Masayuki Kawashima, Miho Furumichi, and Mao Tanabe. Kegg as a reference resource for gene and protein.
37. Timothy A Holton and Edwina C Cornish. Genetics and biochemistry of anthocyanin biosynthesis. *The Plant Cell*, 7(7):1071, 1995.
38. Yoshikazu Tanaka, Nobuhiro Sasaki, and Akemi Ohmiya. Biosynthesis of plant pigments: anthocyanins, betalains and carotenoids. *The Plant Journal*, 54(4):733–749, 2008.
39. Hugo K Dooner, Timothy P Robbins, and Richard A Jorgensen. Genetic and developmental control of anthocyanin biosynthesis. *Annual review of genetics*, 25(1):173–199, 1991.
40. Ronald Koes, Walter Verweij, and Francesca Quattrocchio. Flavonoids: a colorful model for the regulation and evolution of biochemical pathways. *Trends in plant science*, 10(5):236–242, 2005.
41. Ralf Stracke, Martin Werber, and Bernd Weisshaar. The *r2r3-myb* gene family in *arabidopsis thaliana*. *Current opinion in plant biology*, 4(5):447–456, 2001.
42. Sizolwenkosi Mlotshwa, Gail J Pruss, Zhihuan Gao, Nomathamsanqa L Mgutshini, Junjie Li, Xuemei Chen, Lewis H Bowman, and Vicki Vance. Transcriptional silencing induced by *arabidopsis* t-dna mutants is associated with 35s promoter *siRNAs* and requires genes involved in *siRNA*-mediated chromatin silencing. *The Plant Journal*, 64(4):699–704, 2010.
43. Arne Weinhold, Mario Kallenbach, and Ian Thomas Baldwin. Progressive 35s promoter methylation increases rapidly during vegetative development in transgenic *nicotiana attenuata* plants. *BMC plant biology*, 13(1):99, 2013.

44. Lucia Daxinger, Ben Hunter, Mazhar Sheikh, Vincent Jauvion, Virginie Gascioli, Herve Vaucheret, Marjori Matzke, and Ian Furner. Unexpected silencing effects from t-dna tags in arabidopsis. *Trends in plant science*, 13(1):4–6, 2008.
45. Matthew A Streisfeld and Mark D Rausher. Altered trans-regulatory control of gene expression in multiple anthocyanin genes contributes to adaptive flower color evolution in mimulus aurantiacus. *Molecular Biology and Evolution*, 26(2):433–444, 2009.
46. Christian Dubos, José Le Gourriec, Antoine Baudry, Gunnar Huep, Elodie Lanet, Isabelle Debeaujon, Jean-Marc Routaboul, Alessandro Alboresi, Bernd Weisshaar, and Loïc Lepiniec. Myb12 is a new regulator of flavonoid biosynthesis in arabidopsis thaliana. *The Plant Journal*, 55(6):940–953, 2008.
47. Baoqing Ding, Erin L Patterson, Srinidhi V Holalu, Jingjian Li, Grace A Johnson, Lauren E Stanley, Anna B Greenlee, Foen Peng, HD Bradshaw Jr, Michael L Blinov, et al. Two myb proteins in a self-organizing activator-inhibitor system produce spotted pigmentation patterns. *Current Biology*, 2020.
48. Shutian Li. Transcriptional control of flavonoid biosynthesis: fine-tuning of the myb-bhlh-wd40 (mbw) complex. *Plant Signaling & Behavior*, 9(1):e27522, 2014.
49. Arielle M Cooley and John H Willis. Genetic divergence causes parallel evolution of flower color in chilean *Mimulus*. *New Phytologist*, pages 729–739, 2009.
