# Supplementary material for: MYB5a/NEGAN activates petal anthocyanin pigmentation and shapes the MBW regulatory network in Mimulus luteus var. variegatus
Source: bioRxiv preprint, doi:10.1101/2020.04.09.030536, version 3 (2020-04-16)
Supplement: Table S2 [file 030536_file03.xlsx]

## Sheet: S1
Mlu_00001.mRNA1	272
Mlu_00002.mRNA1	57
Mlu_00003.mRNA1	0
Mlu_00004.mRNA1	66
Mlu_00005.mRNA1	102
Mlu_00006.mRNA1	87
Mlu_00007.mRNA1	25
Mlu_00008.mRNA1	113
Mlu_00009.mRNA1	263
Mlu_00010.mRNA1	3
Mlu_00011.mRNA1	1
Mlu_00012.mRNA1	0
Mlu_00013.mRNA1	2
Mlu_00014.mRNA1	39
Mlu_00015.mRNA1	1
Mlu_00016.mRNA1	8
Mlu_00017.mRNA1	0
Mlu_00018.mRNA1	4
Mlu_00019.mRNA1	0
Mlu_00020.mRNA1	78
Mlu_00021.mRNA1	8
Mlu_00022.mRNA1	32
Mlu_00023.mRNA1	105
Mlu_00024.mRNA1	0
Mlu_00025.mRNA1	22
Mlu_00026.mRNA1	5
Mlu_00027.mRNA1	95
Mlu_00028.mRNA1	0
Mlu_00029.mRNA1	46
Mlu_00030.mRNA1	105
Mlu_00031.mRNA1	20
Mlu_00032.mRNA1	0
Mlu_00033.mRNA1	13
Mlu_00034.mRNA1	118
Mlu_00035.mRNA1	88
Mlu_00036.mRNA1	123
Mlu_00037.mRNA1	3
Mlu_00038.mRNA1	350
Mlu_00039.mRNA1	22
Mlu_00040.mRNA1	1
Mlu_00041.mRNA1	1
Mlu_00042.mRNA1	0
Mlu_00043.mRNA1	0
Mlu_00044.mRNA1	115
Mlu_00045.mRNA1	140
Mlu_00046.mRNA1	3
Mlu_00047.mRNA1	0
Mlu_00048.mRNA1	36
Mlu_00049.mRNA1	0
Mlu_00050.mRNA1	2124
Mlu_00051.mRNA1	0
Mlu_00052.mRNA1	0
Mlu_00053.mRNA1	2
Mlu_00054.mRNA1	0
Mlu_00055.mRNA1	0
Mlu_00056.mRNA1	0
Mlu_00057.mRNA1	1
Mlu_00058.mRNA1	2
Mlu_00059.mRNA1	41
Mlu_00060.mRNA1	0
Mlu_00061.mRNA1	359
Mlu_00062.mRNA1	0
Mlu_00063.mRNA1	82
Mlu_00064.mRNA1	95
Mlu_00065.mRNA1	326
Mlu_00066.mRNA1	2
Mlu_00067.mRNA1	585
Mlu_00068.mRNA1	40
Mlu_00069.mRNA1	0
Mlu_00070.mRNA1	4
Mlu_00071.mRNA1	0
Mlu_00072.mRNA1	26
Mlu_00073.mRNA1	43
Mlu_00074.mRNA1	0
Mlu_00075.mRNA1	12
Mlu_00076.mRNA1	0
Mlu_00077.mRNA1	0
Mlu_00078.mRNA1	0
Mlu_00079.mRNA1	74
Mlu_00080.mRNA1	0
Mlu_00081.mRNA1	28
Mlu_00082.mRNA1	0
Mlu_00083.mRNA1	8
Mlu_00084.mRNA1	82
Mlu_00085.mRNA1	2
Mlu_00086.mRNA1	52
Mlu_00087.mRNA1	14
Mlu_00088.mRNA1	538
Mlu_00089.mRNA1	63
Mlu_00090.mRNA1	0
Mlu_00091.mRNA1	9
Mlu_00092.mRNA1	288
Mlu_00093.mRNA1	182
Mlu_00094.mRNA1	128
Mlu_00095.mRNA1	0
Mlu_00096.mRNA1	30
Mlu_00097.mRNA1	0
Mlu_00098.mRNA1	0
Mlu_00099.mRNA1	0
Mlu_00100.mRNA1	2
Mlu_00101.mRNA1	0
Mlu_00102.mRNA1	92
Mlu_00103.mRNA1	3
Mlu_00104.mRNA1	346
Mlu_00105.mRNA1	19
Mlu_00106.mRNA1	168
Mlu_00107.mRNA1	0
Mlu_00108.mRNA1	400
Mlu_00109.mRNA1	314
Mlu_00110.mRNA1	42
Mlu_00111.mRNA1	202
Mlu_00112.mRNA1	3
Mlu_00113.mRNA1	4
Mlu_00114.mRNA1	105
Mlu_00115.mRNA1	48
Mlu_00116.mRNA1	111
Mlu_00117.mRNA1	31
Mlu_00118.mRNA1	60
Mlu_00119.mRNA1	13
Mlu_00120.mRNA1	92
Mlu_00121.mRNA1	12
Mlu_00122.mRNA1	141
Mlu_00123.mRNA1	85
Mlu_00124.mRNA1	37
Mlu_00125.mRNA1	57
Mlu_00126.mRNA1	51
Mlu_00127.mRNA1	129
Mlu_00128.mRNA1	135
Mlu_00129.mRNA1	576
Mlu_00130.mRNA1	20
Mlu_00131.mRNA1	77
Mlu_00132.mRNA1	596
Mlu_00133.mRNA1	8
Mlu_00134.mRNA1	9
Mlu_00135.mRNA1	2
Mlu_00136.mRNA1	18
Mlu_00137.mRNA1	0
Mlu_00138.mRNA1	7
Mlu_00139.mRNA1	0
Mlu_00140.mRNA1	24
Mlu_00141.mRNA1	31
Mlu_00142.mRNA1	52
Mlu_00143.mRNA1	100
Mlu_00144.mRNA1	85
Mlu_00145.mRNA1	0
Mlu_00146.mRNA1	0
Mlu_00147.mRNA1	5
Mlu_00148.mRNA1	0
Mlu_00149.mRNA1	23
Mlu_00150.mRNA1	146
Mlu_00151.mRNA1	18
Mlu_00152.mRNA1	128
Mlu_00153.mRNA1	0
Mlu_00154.mRNA1	142
Mlu_00155.mRNA1	48
Mlu_00156.mRNA1	4131
Mlu_00157.mRNA1	9
Mlu_00158.mRNA1	0
Mlu_00159.mRNA1	0
Mlu_00160.mRNA1	174
Mlu_00161.mRNA1	0
Mlu_00162.mRNA1	0
Mlu_00163.mRNA1	88
Mlu_00164.mRNA1	304
Mlu_00165.mRNA1	25
Mlu_00166.mRNA1	86
Mlu_00167.mRNA1	0
Mlu_00168.mRNA1	24
Mlu_00169.mRNA1	90
Mlu_00170.mRNA1	109
Mlu_00171.mRNA1	73
Mlu_00172.mRNA1	23
Mlu_00173.mRNA1	12
Mlu_00174.mRNA1	27
Mlu_00175.mRNA1	164
Mlu_00176.mRNA1	29
Mlu_00177.mRNA1	204
Mlu_00178.mRNA1	12
Mlu_00179.mRNA1	136
Mlu_00180.mRNA1	4
Mlu_00181.mRNA1	11
Mlu_00182.mRNA1	0
Mlu_00183.mRNA1	0
Mlu_00184.mRNA1	0
Mlu_00185.mRNA1	0
Mlu_00186.mRNA1	123
Mlu_00187.mRNA1	348
Mlu_00188.mRNA1	416
Mlu_00189.mRNA1	129
Mlu_00190.mRNA1	78
Mlu_00191.mRNA1	5
Mlu_00192.mRNA1	10
Mlu_00193.mRNA1	2
Mlu_00194.mRNA1	0
Mlu_00195.mRNA1	173
Mlu_00196.mRNA1	124
Mlu_00197.mRNA1	4
Mlu_00198.mRNA1	1
Mlu_00199.mRNA1	0
Mlu_00200.mRNA1	193
Mlu_00201.mRNA1	193
Mlu_00202.mRNA1	27
Mlu_00203.mRNA1	4
Mlu_00204.mRNA1	0
Mlu_00205.mRNA1	0
Mlu_00206.mRNA1	23
Mlu_00207.mRNA1	0
Mlu_00208.mRNA1	105
Mlu_00209.mRNA1	39
Mlu_00210.mRNA1	4
Mlu_00211.mRNA1	2
Mlu_00212.mRNA1	44
Mlu_00213.mRNA1	53
Mlu_00214.mRNA1	5
Mlu_00215.mRNA1	129
Mlu_00216.mRNA1	64
Mlu_00217.mRNA1	28
Mlu_00218.mRNA1	77
Mlu_00219.mRNA1	44
Mlu_00220.mRNA1	26
Mlu_00221.mRNA1	27
Mlu_00222.mRNA1	41
Mlu_00223.mRNA1	50
Mlu_00224.mRNA1	62
Mlu_00225.mRNA1	227
Mlu_00226.mRNA1	25
Mlu_00227.mRNA1	521
Mlu_00228.mRNA1	0
Mlu_00229.mRNA1	24
Mlu_00230.mRNA1	41
Mlu_00231.mRNA1	0
Mlu_00232.mRNA1	0
Mlu_00233.mRNA1	42
Mlu_00234.mRNA1	0
Mlu_00235.mRNA1	73
Mlu_00236.mRNA1	82
Mlu_00237.mRNA1	192
Mlu_00238.mRNA1	16
Mlu_00239.mRNA1	0
Mlu_00240.mRNA1	2
Mlu_00241.mRNA1	218
Mlu_00242.mRNA1	0
Mlu_00243.mRNA1	0
Mlu_00244.mRNA1	0
Mlu_00245.mRNA1	153
Mlu_00246.mRNA1	42
Mlu_00247.mRNA1	342
Mlu_00248.mRNA1	21
Mlu_00249.mRNA1	80
Mlu_00250.mRNA1	44
Mlu_00251.mRNA1	1801
Mlu_00252.mRNA1	392
Mlu_00253.mRNA1	286
Mlu_00254.mRNA1	102
Mlu_00255.mRNA1	585
Mlu_00256.mRNA1	4
Mlu_00257.mRNA1	1029
Mlu_00258.mRNA1	128
Mlu_00259.mRNA1	0
Mlu_00260.mRNA1	0
Mlu_00261.mRNA1	128
Mlu_00262.mRNA1	1091
Mlu_00263.mRNA1	275
Mlu_00264.mRNA1	1
Mlu_00265.mRNA1	0
Mlu_00266.mRNA1	44
Mlu_00267.mRNA1	0
Mlu_00268.mRNA1	1114
Mlu_00269.mRNA1	576
Mlu_00270.mRNA1	78
Mlu_00271.mRNA1	866
Mlu_00272.mRNA1	14
Mlu_00273.mRNA1	796
Mlu_00274.mRNA1	0
Mlu_00275.mRNA1	1
Mlu_00276.mRNA1	54
Mlu_00277.mRNA1	0
Mlu_00278.mRNA1	0
Mlu_00279.mRNA1	0
Mlu_00280.mRNA1	0
Mlu_00281.mRNA1	0
Mlu_00282.mRNA1	1
Mlu_00283.mRNA1	0
Mlu_00284.mRNA1	196
Mlu_00285.mRNA1	160
Mlu_00286.mRNA1	73
Mlu_00287.mRNA1	52
Mlu_00288.mRNA1	144
Mlu_00289.mRNA1	0
Mlu_00290.mRNA1	0
Mlu_00291.mRNA1	53
Mlu_00292.mRNA1	0
Mlu_00293.mRNA1	192
Mlu_00294.mRNA1	0
Mlu_00295.mRNA1	17
Mlu_00296.mRNA1	344
Mlu_00297.mRNA1	0
Mlu_00298.mRNA1	119
Mlu_00299.mRNA1	757
Mlu_00300.mRNA1	24
Mlu_00301.mRNA1	76
Mlu_00302.mRNA1	136
Mlu_00303.mRNA1	29
Mlu_00304.mRNA1	466
Mlu_00305.mRNA1	234
Mlu_00306.mRNA1	22
Mlu_00307.mRNA1	0
Mlu_00308.mRNA1	124
Mlu_00309.mRNA1	88
Mlu_00310.mRNA1	0
Mlu_00311.mRNA1	23
Mlu_00312.mRNA1	158
Mlu_00313.mRNA1	0
Mlu_00314.mRNA1	0
Mlu_00315.mRNA1	84
Mlu_00316.mRNA1	0
Mlu_00317.mRNA1	0
Mlu_00318.mRNA1	117
Mlu_00319.mRNA1	0
Mlu_00320.mRNA1	1
Mlu_00321.mRNA1	1
Mlu_00322.mRNA1	83
Mlu_00323.mRNA1	55
Mlu_00324.mRNA1	685
Mlu_00325.mRNA1	23
Mlu_00326.mRNA1	405
Mlu_00327.mRNA1	132
Mlu_00328.mRNA1	0
Mlu_00329.mRNA1	39
Mlu_00330.mRNA1	0
Mlu_00331.mRNA1	16
Mlu_00332.mRNA1	0
Mlu_00333.mRNA1	0
Mlu_00334.mRNA1	36
Mlu_00335.mRNA1	0
Mlu_00336.mRNA1	263
Mlu_00337.mRNA1	2
Mlu_00338.mRNA1	0
Mlu_00339.mRNA1	0
Mlu_00340.mRNA1	575
Mlu_00341.mRNA1	684
Mlu_00342.mRNA1	181
Mlu_00343.mRNA1	8
Mlu_00344.mRNA1	69
Mlu_00345.mRNA1	24
Mlu_00346.mRNA1	40
Mlu_00347.mRNA1	0
Mlu_00348.mRNA1	41
Mlu_00349.mRNA1	485
Mlu_00350.mRNA1	0
Mlu_00351.mRNA1	0
Mlu_00352.mRNA1	12
Mlu_00353.mRNA1	191
Mlu_00354.mRNA1	0
Mlu_00355.mRNA1	32
Mlu_00356.mRNA1	0
Mlu_00357.mRNA1	0
Mlu_00358.mRNA1	42
Mlu_00359.mRNA1	115
Mlu_00360.mRNA1	0
Mlu_00361.mRNA1	1
Mlu_00362.mRNA1	273
Mlu_00363.mRNA1	27
Mlu_00364.mRNA1	68
Mlu_00365.mRNA1	56
Mlu_00366.mRNA1	0
Mlu_00367.mRNA1	103
Mlu_00368.mRNA1	158
Mlu_00369.mRNA1	142
Mlu_00370.mRNA1	65
Mlu_00371.mRNA1	0
Mlu_00372.mRNA1	124
Mlu_00373.mRNA1	37
Mlu_00374.mRNA1	4
Mlu_00375.mRNA1	502
Mlu_00376.mRNA1	11
Mlu_00377.mRNA1	94
Mlu_00378.mRNA1	60
Mlu_00379.mRNA1	382
Mlu_00380.mRNA1	78
Mlu_00381.mRNA1	253
Mlu_00382.mRNA1	0
Mlu_00383.mRNA1	37
Mlu_00384.mRNA1	0
Mlu_00385.mRNA1	6
Mlu_00386.mRNA1	2
Mlu_00387.mRNA1	389
Mlu_00388.mRNA1	0
Mlu_00389.mRNA1	48
Mlu_00390.mRNA1	1
Mlu_00391.mRNA1	107
Mlu_00392.mRNA1	25
Mlu_00393.mRNA1	46
Mlu_00394.mRNA1	242
Mlu_00395.mRNA1	132
Mlu_00396.mRNA1	63
Mlu_00397.mRNA1	94
Mlu_00398.mRNA1	48
Mlu_00399.mRNA1	259
Mlu_00400.mRNA1	100
Mlu_00401.mRNA1	51
Mlu_00402.mRNA1	1
Mlu_00403.mRNA1	61
Mlu_00404.mRNA1	2
Mlu_00405.mRNA1	297
Mlu_00406.mRNA1	164
Mlu_00407.mRNA1	36
Mlu_00408.mRNA1	13
Mlu_00409.mRNA1	0
Mlu_00410.mRNA1	59
Mlu_00411.mRNA1	112
Mlu_00412.mRNA1	407
Mlu_00413.mRNA1	0
Mlu_00414.mRNA1	56
Mlu_00415.mRNA1	1
Mlu_00416.mRNA1	68
Mlu_00417.mRNA1	10
Mlu_00418.mRNA1	37
Mlu_00419.mRNA1	359
Mlu_00420.mRNA1	111
Mlu_00421.mRNA1	53
Mlu_00422.mRNA1	4
Mlu_00423.mRNA1	90
Mlu_00424.mRNA1	6
Mlu_00425.mRNA1	0
Mlu_00426.mRNA1	17
Mlu_00427.mRNA1	1
Mlu_00428.mRNA1	3
Mlu_00429.mRNA1	45
Mlu_00430.mRNA1	99
Mlu_00431.mRNA1	0
Mlu_00432.mRNA1	84
Mlu_00433.mRNA1	4
Mlu_00434.mRNA1	27
Mlu_00435.mRNA1	33
Mlu_00436.mRNA1	121
Mlu_00437.mRNA1	10
Mlu_00438.mRNA1	3
Mlu_00439.mRNA1	5
Mlu_00440.mRNA1	85
Mlu_00441.mRNA1	197
Mlu_00442.mRNA1	8
Mlu_00443.mRNA1	21
Mlu_00444.mRNA1	61
Mlu_00445.mRNA1	0
Mlu_00446.mRNA1	0
Mlu_00447.mRNA1	1
Mlu_00448.mRNA1	791
Mlu_00449.mRNA1	0
Mlu_00450.mRNA1	0
Mlu_00451.mRNA1	390
Mlu_00452.mRNA1	10
Mlu_00453.mRNA1	523
Mlu_00454.mRNA1	116
Mlu_00455.mRNA1	185
Mlu_00456.mRNA1	86
Mlu_00457.mRNA1	1
Mlu_00458.mRNA1	0
Mlu_00459.mRNA1	50
Mlu_00460.mRNA1	58
Mlu_00461.mRNA1	16
Mlu_00462.mRNA1	8
Mlu_00463.mRNA1	72
Mlu_00464.mRNA1	2
Mlu_00465.mRNA1	123
Mlu_00466.mRNA1	4
Mlu_00467.mRNA1	18
Mlu_00468.mRNA1	87
Mlu_00469.mRNA1	127
Mlu_00470.mRNA1	114
Mlu_00471.mRNA1	132
Mlu_00472.mRNA1	12
Mlu_00473.mRNA1	156
Mlu_00474.mRNA1	21
Mlu_00475.mRNA1	63
Mlu_00476.mRNA1	2902
Mlu_00477.mRNA1	58
Mlu_00478.mRNA1	0
Mlu_00479.mRNA1	0
Mlu_00480.mRNA1	147
Mlu_00481.mRNA1	159
Mlu_00482.mRNA1	1532
Mlu_00483.mRNA1	12
Mlu_00484.mRNA1	139
Mlu_00485.mRNA1	0
Mlu_00486.mRNA1	83
Mlu_00487.mRNA1	55
Mlu_00488.mRNA1	1396
Mlu_00489.mRNA1	295
Mlu_00490.mRNA1	30
Mlu_00491.mRNA1	46
Mlu_00492.mRNA1	22
Mlu_00493.mRNA1	757
Mlu_00494.mRNA1	69
Mlu_00495.mRNA1	0
Mlu_00496.mRNA1	0
Mlu_00497.mRNA1	50
Mlu_00498.mRNA1	0
Mlu_00499.mRNA1	17
Mlu_00500.mRNA1	0
Mlu_00501.mRNA1	42
Mlu_00502.mRNA1	8
Mlu_00503.mRNA1	151
Mlu_00504.mRNA1	9
Mlu_00505.mRNA1	0
Mlu_00506.mRNA1	0
Mlu_00507.mRNA1	17
Mlu_00508.mRNA1	0
Mlu_00509.mRNA1	76
Mlu_00510.mRNA1	173
Mlu_00511.mRNA1	49
Mlu_00512.mRNA1	98
Mlu_00513.mRNA1	0
Mlu_00514.mRNA1	181
Mlu_00515.mRNA1	212
Mlu_00516.mRNA1	24
Mlu_00517.mRNA1	0
Mlu_00518.mRNA1	1
Mlu_00519.mRNA1	77
Mlu_00520.mRNA1	10
Mlu_00521.mRNA1	325
Mlu_00522.mRNA1	64
Mlu_00523.mRNA1	16
Mlu_00524.mRNA1	5
Mlu_00525.mRNA1	461
Mlu_00526.mRNA1	0
Mlu_00527.mRNA1	0
Mlu_00528.mRNA1	50
Mlu_00529.mRNA1	37
Mlu_00530.mRNA1	0
Mlu_00531.mRNA1	0
Mlu_00532.mRNA1	4
Mlu_00533.mRNA1	21
Mlu_00534.mRNA1	118
Mlu_00535.mRNA1	10
Mlu_00536.mRNA1	4
Mlu_00537.mRNA1	0
Mlu_00538.mRNA1	829
Mlu_00539.mRNA1	49
Mlu_00540.mRNA1	0
Mlu_00541.mRNA1	15
Mlu_00542.mRNA1	13
Mlu_00543.mRNA1	80
Mlu_00544.mRNA1	224
Mlu_00545.mRNA1	0
Mlu_00546.mRNA1	1
Mlu_00547.mRNA1	5
Mlu_00548.mRNA1	0
Mlu_00549.mRNA1	0
Mlu_00550.mRNA1	21
Mlu_00551.mRNA1	114
Mlu_00552.mRNA1	761
Mlu_00553.mRNA1	0
Mlu_00554.mRNA1	320
Mlu_00555.mRNA1	36
Mlu_00556.mRNA1	0
Mlu_00557.mRNA1	2
Mlu_00558.mRNA1	20
Mlu_00559.mRNA1	0
Mlu_00560.mRNA1	100
Mlu_00561.mRNA1	46
Mlu_00562.mRNA1	650
Mlu_00563.mRNA1	19
Mlu_00564.mRNA1	11
Mlu_00565.mRNA1	0
Mlu_00566.mRNA1	8
Mlu_00567.mRNA1	17
Mlu_00568.mRNA1	28
Mlu_00569.mRNA1	75
Mlu_00570.mRNA1	19
Mlu_00571.mRNA1	724
Mlu_00572.mRNA1	49
Mlu_00573.mRNA1	8
Mlu_00574.mRNA1	17
Mlu_00575.mRNA1	35
Mlu_00576.mRNA1	0
Mlu_00577.mRNA1	0
Mlu_00578.mRNA1	365
Mlu_00579.mRNA1	4
Mlu_00580.mRNA1	15
Mlu_00581.mRNA1	361
Mlu_00582.mRNA1	0
Mlu_00583.mRNA1	18
Mlu_00584.mRNA1	73
Mlu_00585.mRNA1	2
Mlu_00586.mRNA1	44
Mlu_00587.mRNA1	360
Mlu_00588.mRNA1	0
Mlu_00589.mRNA1	56
Mlu_00590.mRNA1	25
Mlu_00591.mRNA1	703
Mlu_00592.mRNA1	48
Mlu_00593.mRNA1	9
Mlu_00594.mRNA1	182
Mlu_00595.mRNA1	0
Mlu_00596.mRNA1	1
Mlu_00597.mRNA1	0
Mlu_00598.mRNA1	0
Mlu_00599.mRNA1	16
Mlu_00600.mRNA1	150
Mlu_00601.mRNA1	688
Mlu_00602.mRNA1	0
Mlu_00603.mRNA1	209
Mlu_00604.mRNA1	0
Mlu_00605.mRNA1	115
Mlu_00606.mRNA1	60
Mlu_00607.mRNA1	11
Mlu_00608.mRNA1	245
Mlu_00609.mRNA1	9
Mlu_00610.mRNA1	45
Mlu_00611.mRNA1	0
Mlu_00612.mRNA1	4
Mlu_00613.mRNA1	17
Mlu_00614.mRNA1	424
Mlu_00615.mRNA1	205
Mlu_00616.mRNA1	0
Mlu_00617.mRNA1	82
Mlu_00618.mRNA1	13
Mlu_00619.mRNA1	10
Mlu_00620.mRNA1	216
Mlu_00621.mRNA1	113
Mlu_00622.mRNA1	430
Mlu_00623.mRNA1	6
Mlu_00624.mRNA1	767
Mlu_00625.mRNA1	7
Mlu_00626.mRNA1	6
Mlu_00627.mRNA1	321
Mlu_00628.mRNA1	0
Mlu_00629.mRNA1	0
Mlu_00630.mRNA1	11
Mlu_00631.mRNA1	147
Mlu_00632.mRNA1	6
Mlu_00633.mRNA1	18
Mlu_00634.mRNA1	0
Mlu_00635.mRNA1	214
Mlu_00636.mRNA1	189
Mlu_00637.mRNA1	27
Mlu_00638.mRNA1	117
Mlu_00639.mRNA1	6
Mlu_00640.mRNA1	55
Mlu_00641.mRNA1	1
Mlu_00642.mRNA1	48
Mlu_00643.mRNA1	19
Mlu_00644.mRNA1	121
Mlu_00645.mRNA1	27
Mlu_00646.mRNA1	93
Mlu_00647.mRNA1	95
Mlu_00648.mRNA1	67
Mlu_00649.mRNA1	132
Mlu_00650.mRNA1	93
Mlu_00651.mRNA1	78
Mlu_00652.mRNA1	194
Mlu_00653.mRNA1	25
Mlu_00654.mRNA1	0
Mlu_00655.mRNA1	0
Mlu_00656.mRNA1	15
Mlu_00657.mRNA1	0
Mlu_00658.mRNA1	0
Mlu_00659.mRNA1	1029
Mlu_00660.mRNA1	7
Mlu_00661.mRNA1	13
Mlu_00662.mRNA1	20
Mlu_00663.mRNA1	2
Mlu_00664.mRNA1	10
Mlu_00665.mRNA1	0
Mlu_00666.mRNA1	4
Mlu_00667.mRNA1	25
Mlu_00668.mRNA1	0
Mlu_00669.mRNA1	1
Mlu_00670.mRNA1	0
Mlu_00671.mRNA1	108
Mlu_00672.mRNA1	6
Mlu_00673.mRNA1	0
Mlu_00674.mRNA1	0
Mlu_00675.mRNA1	2
Mlu_00676.mRNA1	122
Mlu_00677.mRNA1	67
Mlu_00678.mRNA1	0
Mlu_00679.mRNA1	141
Mlu_00680.mRNA1	163
Mlu_00681.mRNA1	12
Mlu_00682.mRNA1	114
Mlu_00683.mRNA1	298
Mlu_00684.mRNA1	0
Mlu_00685.mRNA1	6
Mlu_00686.mRNA1	226
Mlu_00687.mRNA1	577
Mlu_00688.mRNA1	22
Mlu_00689.mRNA1	1
Mlu_00690.mRNA1	0
Mlu_00691.mRNA1	0
Mlu_00692.mRNA1	0
Mlu_00693.mRNA1	0
Mlu_00694.mRNA1	108
Mlu_00695.mRNA1	190
Mlu_00696.mRNA1	54
Mlu_00697.mRNA1	0
Mlu_00698.mRNA1	50
Mlu_00699.mRNA1	0
Mlu_00700.mRNA1	25
Mlu_00701.mRNA1	35
Mlu_00702.mRNA1	0
Mlu_00703.mRNA1	2
Mlu_00704.mRNA1	291
Mlu_00705.mRNA1	65
Mlu_00706.mRNA1	235
Mlu_00707.mRNA1	9
Mlu_00708.mRNA1	37
Mlu_00709.mRNA1	39
Mlu_00710.mRNA1	13
Mlu_00711.mRNA1	2
Mlu_00712.mRNA1	17
Mlu_00713.mRNA1	64
Mlu_00714.mRNA1	141
Mlu_00715.mRNA1	1
Mlu_00716.mRNA1	65
Mlu_00717.mRNA1	6
Mlu_00718.mRNA1	49
Mlu_00719.mRNA1	87
Mlu_00720.mRNA1	11
Mlu_00721.mRNA1	130
Mlu_00722.mRNA1	1012
Mlu_00723.mRNA1	0
Mlu_00724.mRNA1	44
Mlu_00725.mRNA1	956
Mlu_00726.mRNA1	0
Mlu_00727.mRNA1	16
Mlu_00728.mRNA1	1
Mlu_00729.mRNA1	0
Mlu_00730.mRNA1	34
Mlu_00731.mRNA1	248
Mlu_00732.mRNA1	0
Mlu_00733.mRNA1	22
Mlu_00734.mRNA1	14
Mlu_00735.mRNA1	0
Mlu_00736.mRNA1	56
Mlu_00737.mRNA1	201
Mlu_00738.mRNA1	85
Mlu_00739.mRNA1	94
Mlu_00740.mRNA1	0
Mlu_00741.mRNA1	0
Mlu_00742.mRNA1	0
Mlu_00743.mRNA1	262
Mlu_00744.mRNA1	22
Mlu_00745.mRNA1	117
Mlu_00746.mRNA1	3
Mlu_00747.mRNA1	16
Mlu_00748.mRNA1	0
Mlu_00749.mRNA1	1
Mlu_00750.mRNA1	0
Mlu_00751.mRNA1	0
Mlu_00752.mRNA1	0
Mlu_00753.mRNA1	435
Mlu_00754.mRNA1	0
Mlu_00755.mRNA1	112
Mlu_00756.mRNA1	57
Mlu_00757.mRNA1	23
Mlu_00758.mRNA1	26
Mlu_00759.mRNA1	50
Mlu_00760.mRNA1	154
Mlu_00761.mRNA1	105
Mlu_00762.mRNA1	0
Mlu_00763.mRNA1	10
Mlu_00764.mRNA1	19
Mlu_00765.mRNA1	769
Mlu_00766.mRNA1	229
Mlu_00767.mRNA1	118
Mlu_00768.mRNA1	150
Mlu_00769.mRNA1	0
Mlu_00770.mRNA1	218
Mlu_00771.mRNA1	119
Mlu_00772.mRNA1	50
Mlu_00773.mRNA1	1
Mlu_00774.mRNA1	1
Mlu_00775.mRNA1	148
Mlu_00776.mRNA1	1
Mlu_00777.mRNA1	53
Mlu_00778.mRNA1	29
Mlu_00779.mRNA1	186
Mlu_00780.mRNA1	152
Mlu_00781.mRNA1	0
Mlu_00782.mRNA1	0
Mlu_00783.mRNA1	193
Mlu_00784.mRNA1	241
Mlu_00785.mRNA1	0
Mlu_00786.mRNA1	0
Mlu_00787.mRNA1	0
Mlu_00788.mRNA1	2
Mlu_00789.mRNA1	113
Mlu_00790.mRNA1	5
Mlu_00791.mRNA1	0
Mlu_00792.mRNA1	8
Mlu_00793.mRNA1	108
Mlu_00794.mRNA1	0
Mlu_00795.mRNA1	0
Mlu_00796.mRNA1	110
Mlu_00797.mRNA1	0
Mlu_00798.mRNA1	1182
Mlu_00799.mRNA1	34
Mlu_00800.mRNA1	10
Mlu_00801.mRNA1	0
Mlu_00802.mRNA1	64
Mlu_00803.mRNA1	0
Mlu_00804.mRNA1	396
Mlu_00805.mRNA1	126
Mlu_00806.mRNA1	37
Mlu_00807.mRNA1	191
Mlu_00808.mRNA1	58
Mlu_00809.mRNA1	157
Mlu_00810.mRNA1	104
Mlu_00811.mRNA1	31
Mlu_00812.mRNA1	67
Mlu_00813.mRNA1	0
Mlu_00814.mRNA1	419
Mlu_00815.mRNA1	120
Mlu_00816.mRNA1	4
Mlu_00817.mRNA1	255
Mlu_00818.mRNA1	663
Mlu_00819.mRNA1	31
Mlu_00820.mRNA1	8
Mlu_00821.mRNA1	46
Mlu_00822.mRNA1	8
Mlu_00823.mRNA1	28
Mlu_00824.mRNA1	41
Mlu_00825.mRNA1	4
Mlu_00826.mRNA1	280
Mlu_00827.mRNA1	31
Mlu_00828.mRNA1	509
Mlu_00829.mRNA1	268
Mlu_00830.mRNA1	0
Mlu_00831.mRNA1	73
Mlu_00832.mRNA1	24
Mlu_00833.mRNA1	255
Mlu_00834.mRNA1	48
Mlu_00835.mRNA1	62
Mlu_00836.mRNA1	10
Mlu_00837.mRNA1	0
Mlu_00838.mRNA1	67
Mlu_00839.mRNA1	0
Mlu_00840.mRNA1	11
Mlu_00841.mRNA1	115
Mlu_00842.mRNA1	70
Mlu_00843.mRNA1	3
Mlu_00844.mRNA1	0
Mlu_00845.mRNA1	5
Mlu_00846.mRNA1	14
Mlu_00847.mRNA1	131
Mlu_00848.mRNA1	0
Mlu_00849.mRNA1	0
Mlu_00850.mRNA1	13
Mlu_00851.mRNA1	2
Mlu_00852.mRNA1	5
Mlu_00853.mRNA1	0
Mlu_00854.mRNA1	8
Mlu_00855.mRNA1	5
Mlu_00856.mRNA1	34
Mlu_00857.mRNA1	2
Mlu_00858.mRNA1	36
Mlu_00859.mRNA1	13
Mlu_00860.mRNA1	25
Mlu_00861.mRNA1	222
Mlu_00862.mRNA1	7
Mlu_00863.mRNA1	0
Mlu_00864.mRNA1	463
Mlu_00865.mRNA1	80
Mlu_00866.mRNA1	15
Mlu_00867.mRNA1	363
Mlu_00868.mRNA1	27
Mlu_00869.mRNA1	65
Mlu_00870.mRNA1	0
Mlu_00871.mRNA1	29
Mlu_00872.mRNA1	1
Mlu_00873.mRNA1	415
Mlu_00874.mRNA1	0
Mlu_00875.mRNA1	145
Mlu_00876.mRNA1	1
Mlu_00877.mRNA1	81
Mlu_00878.mRNA1	314
Mlu_00879.mRNA1	545
Mlu_00880.mRNA1	17
Mlu_00881.mRNA1	37
Mlu_00882.mRNA1	17
Mlu_00883.mRNA1	125
Mlu_00884.mRNA1	49
Mlu_00885.mRNA1	62
Mlu_00886.mRNA1	297
Mlu_00887.mRNA1	51
Mlu_00888.mRNA1	13
Mlu_00889.mRNA1	25
Mlu_00890.mRNA1	0
Mlu_00891.mRNA1	159
Mlu_00892.mRNA1	100
Mlu_00893.mRNA1	32
Mlu_00894.mRNA1	196
Mlu_00895.mRNA1	78
Mlu_00896.mRNA1	0
Mlu_00897.mRNA1	37
Mlu_00898.mRNA1	0
Mlu_00899.mRNA1	39
Mlu_00900.mRNA1	1
Mlu_00901.mRNA1	126
Mlu_00902.mRNA1	0
Mlu_00903.mRNA1	59
Mlu_00904.mRNA1	3
Mlu_00905.mRNA1	237
Mlu_00906.mRNA1	3
Mlu_00907.mRNA1	19
Mlu_00908.mRNA1	0
Mlu_00909.mRNA1	6
Mlu_00910.mRNA1	0
Mlu_00911.mRNA1	25
Mlu_00912.mRNA1	21
Mlu_00913.mRNA1	42
Mlu_00914.mRNA1	56
Mlu_00915.mRNA1	0
Mlu_00916.mRNA1	45
Mlu_00917.mRNA1	0
Mlu_00918.mRNA1	0
Mlu_00919.mRNA1	0
Mlu_00920.mRNA1	0
Mlu_00921.mRNA1	8
Mlu_00922.mRNA1	198
Mlu_00923.mRNA1	265
Mlu_00924.mRNA1	63
Mlu_00925.mRNA1	87
Mlu_00926.mRNA1	0
Mlu_00927.mRNA1	164
Mlu_00928.mRNA1	48
Mlu_00929.mRNA1	0
Mlu_00930.mRNA1	0
Mlu_00931.mRNA1	0
Mlu_00932.mRNA1	0
Mlu_00933.mRNA1	0
Mlu_00934.mRNA1	106
Mlu_00935.mRNA1	1
Mlu_00936.mRNA1	1
Mlu_00937.mRNA1	0
Mlu_00938.mRNA1	8
Mlu_00939.mRNA1	0
Mlu_00940.mRNA1	47
Mlu_00941.mRNA1	138
Mlu_00942.mRNA1	192
Mlu_00943.mRNA1	442
Mlu_00944.mRNA1	89
Mlu_00945.mRNA1	32
Mlu_00946.mRNA1	148
Mlu_00947.mRNA1	59
Mlu_00948.mRNA1	9
Mlu_00949.mRNA1	538
Mlu_00950.mRNA1	1
Mlu_00951.mRNA1	124
Mlu_00952.mRNA1	0
Mlu_00953.mRNA1	0
Mlu_00954.mRNA1	0
Mlu_00955.mRNA1	3274
Mlu_00956.mRNA1	1
Mlu_00957.mRNA1	14
Mlu_00958.mRNA1	0
Mlu_00959.mRNA1	0
Mlu_00960.mRNA1	58
Mlu_00961.mRNA1	113
Mlu_00962.mRNA1	3
Mlu_00963.mRNA1	215
Mlu_00964.mRNA1	5
Mlu_00965.mRNA1	0
Mlu_00966.mRNA1	191
Mlu_00967.mRNA1	30
Mlu_00968.mRNA1	35
Mlu_00969.mRNA1	52
Mlu_00970.mRNA1	5
Mlu_00971.mRNA1	336
Mlu_00972.mRNA1	32
Mlu_00973.mRNA1	34
Mlu_00974.mRNA1	53
Mlu_00975.mRNA1	1
Mlu_00976.mRNA1	65
Mlu_00977.mRNA1	54
Mlu_00978.mRNA1	126
Mlu_00979.mRNA1	7
Mlu_00980.mRNA1	0
Mlu_00981.mRNA1	0
Mlu_00982.mRNA1	0
Mlu_00983.mRNA1	10
Mlu_00984.mRNA1	4
Mlu_00985.mRNA1	4
Mlu_00986.mRNA1	85
Mlu_00987.mRNA1	31
Mlu_00988.mRNA1	0
Mlu_00989.mRNA1	4
Mlu_00990.mRNA1	3
Mlu_00991.mRNA1	2
Mlu_00992.mRNA1	12
Mlu_00993.mRNA1	1
Mlu_00994.mRNA1	61
Mlu_00995.mRNA1	540
Mlu_00996.mRNA1	36
Mlu_00997.mRNA1	0
Mlu_00998.mRNA1	19
Mlu_00999.mRNA1	61
Mlu_01000.mRNA1	0
Mlu_01001.mRNA1	0
Mlu_01002.mRNA1	22
Mlu_01003.mRNA1	77
Mlu_01004.mRNA1	0
Mlu_01005.mRNA1	4
Mlu_01006.mRNA1	17865
Mlu_01007.mRNA1	21742
Mlu_01008.mRNA1	56
Mlu_01009.mRNA1	38
Mlu_01010.mRNA1	57
Mlu_01011.mRNA1	0
Mlu_01012.mRNA1	15
Mlu_01013.mRNA1	80
Mlu_01014.mRNA1	78
Mlu_01015.mRNA1	0
Mlu_01016.mRNA1	1542
Mlu_01017.mRNA1	14
Mlu_01018.mRNA1	141
Mlu_01019.mRNA1	454
Mlu_01020.mRNA1	53
Mlu_01021.mRNA1	67
Mlu_01022.mRNA1	137
Mlu_01023.mRNA1	151
Mlu_01024.mRNA1	1
Mlu_01025.mRNA1	22
Mlu_01026.mRNA1	59
Mlu_01027.mRNA1	87
Mlu_01028.mRNA1	208
Mlu_01029.mRNA1	44
Mlu_01030.mRNA1	137
Mlu_01031.mRNA1	19
Mlu_01032.mRNA1	266
Mlu_01033.mRNA1	152
Mlu_01034.mRNA1	58
Mlu_01035.mRNA1	56
Mlu_01036.mRNA1	791
Mlu_01037.mRNA1	16
Mlu_01038.mRNA1	169
Mlu_01039.mRNA1	0
Mlu_01040.mRNA1	0
Mlu_01041.mRNA1	0
Mlu_01042.mRNA1	3
Mlu_01043.mRNA1	7
Mlu_01044.mRNA1	10
Mlu_01045.mRNA1	16
Mlu_01046.mRNA1	0
Mlu_01047.mRNA1	11
Mlu_01048.mRNA1	0
Mlu_01049.mRNA1	395
Mlu_01050.mRNA1	139
Mlu_01051.mRNA1	0
Mlu_01052.mRNA1	0
Mlu_01053.mRNA1	118
Mlu_01054.mRNA1	7
Mlu_01055.mRNA1	288
Mlu_01056.mRNA1	1494
Mlu_01057.mRNA1	514
Mlu_01058.mRNA1	253
Mlu_01059.mRNA1	28
Mlu_01060.mRNA1	60
Mlu_01061.mRNA1	0
Mlu_01062.mRNA1	13
Mlu_01063.mRNA1	0
Mlu_01064.mRNA1	124
Mlu_01065.mRNA1	0
Mlu_01066.mRNA1	0
Mlu_01067.mRNA1	3
Mlu_01068.mRNA1	49
Mlu_01069.mRNA1	1
Mlu_01070.mRNA1	12
Mlu_01071.mRNA1	43
Mlu_01072.mRNA1	65
Mlu_01073.mRNA1	0
Mlu_01074.mRNA1	0
Mlu_01075.mRNA1	107
Mlu_01076.mRNA1	112
Mlu_01077.mRNA1	13
Mlu_01078.mRNA1	0
Mlu_01079.mRNA1	32
Mlu_01080.mRNA1	0
Mlu_01081.mRNA1	0
Mlu_01082.mRNA1	0
Mlu_01083.mRNA1	0
Mlu_01084.mRNA1	0
Mlu_01085.mRNA1	0
Mlu_01086.mRNA1	3
Mlu_01087.mRNA1	0
Mlu_01088.mRNA1	881
Mlu_01089.mRNA1	804
Mlu_01090.mRNA1	403
Mlu_01091.mRNA1	193
Mlu_01092.mRNA1	13
Mlu_01093.mRNA1	81
Mlu_01094.mRNA1	1
Mlu_01095.mRNA1	1274
Mlu_01096.mRNA1	2
Mlu_01097.mRNA1	0
Mlu_01098.mRNA1	2
Mlu_01099.mRNA1	3
Mlu_01100.mRNA1	0
Mlu_01101.mRNA1	67
Mlu_01102.mRNA1	29
Mlu_01103.mRNA1	5
Mlu_01104.mRNA1	0
Mlu_01105.mRNA1	0
Mlu_01106.mRNA1	35
Mlu_01107.mRNA1	0
Mlu_01108.mRNA1	0
Mlu_01109.mRNA1	0
Mlu_01110.mRNA1	50
Mlu_01111.mRNA1	7
Mlu_01112.mRNA1	19
Mlu_01113.mRNA1	366
Mlu_01114.mRNA1	23
Mlu_01115.mRNA1	99
Mlu_01116.mRNA1	219
Mlu_01117.mRNA1	0
Mlu_01118.mRNA1	0
Mlu_01119.mRNA1	0
Mlu_01120.mRNA1	12
Mlu_01121.mRNA1	27
Mlu_01122.mRNA1	0
Mlu_01123.mRNA1	1
Mlu_01124.mRNA1	32
Mlu_01125.mRNA1	11
Mlu_01126.mRNA1	12
Mlu_01127.mRNA1	0
Mlu_01128.mRNA1	0
Mlu_01129.mRNA1	2
Mlu_01130.mRNA1	0
Mlu_01131.mRNA1	2
Mlu_01132.mRNA1	0
Mlu_01133.mRNA1	2
Mlu_01134.mRNA1	121
Mlu_01135.mRNA1	0
Mlu_01136.mRNA1	27
Mlu_01137.mRNA1	0
Mlu_01138.mRNA1	40
Mlu_01139.mRNA1	19
Mlu_01140.mRNA1	8
Mlu_01141.mRNA1	0
Mlu_01142.mRNA1	506
Mlu_01143.mRNA1	80
Mlu_01144.mRNA1	4
Mlu_01145.mRNA1	20
Mlu_01146.mRNA1	1
Mlu_01147.mRNA1	9
Mlu_01148.mRNA1	68
Mlu_01149.mRNA1	94
Mlu_01150.mRNA1	0
Mlu_01151.mRNA1	0
Mlu_01152.mRNA1	4
Mlu_01153.mRNA1	78
Mlu_01154.mRNA1	0
Mlu_01155.mRNA1	182
Mlu_01156.mRNA1	5
Mlu_01157.mRNA1	61
Mlu_01158.mRNA1	9
Mlu_01159.mRNA1	13
Mlu_01160.mRNA1	81
Mlu_01161.mRNA1	0
Mlu_01162.mRNA1	0
Mlu_01163.mRNA1	0
Mlu_01164.mRNA1	44
Mlu_01165.mRNA1	2
Mlu_01166.mRNA1	5
Mlu_01167.mRNA1	7
Mlu_01168.mRNA1	21
Mlu_01169.mRNA1	237
Mlu_01170.mRNA1	59
Mlu_01171.mRNA1	336
Mlu_01172.mRNA1	116
Mlu_01173.mRNA1	69
Mlu_01174.mRNA1	0
Mlu_01175.mRNA1	0
Mlu_01176.mRNA1	22
Mlu_01177.mRNA1	0
Mlu_01178.mRNA1	13
Mlu_01179.mRNA1	0
Mlu_01180.mRNA1	0
Mlu_01181.mRNA1	0
Mlu_01182.mRNA1	2
Mlu_01183.mRNA1	0
Mlu_01184.mRNA1	0
Mlu_01185.mRNA1	77
Mlu_01186.mRNA1	111
Mlu_01187.mRNA1	193
Mlu_01188.mRNA1	30
Mlu_01189.mRNA1	161
Mlu_01190.mRNA1	3
Mlu_01191.mRNA1	0
Mlu_01192.mRNA1	171
Mlu_01193.mRNA1	216
Mlu_01194.mRNA1	48
Mlu_01195.mRNA1	3
Mlu_01196.mRNA1	0
Mlu_01197.mRNA1	39
Mlu_01198.mRNA1	3
Mlu_01199.mRNA1	69
Mlu_01200.mRNA1	41
Mlu_01201.mRNA1	89
Mlu_01202.mRNA1	128
Mlu_01203.mRNA1	5
Mlu_01204.mRNA1	244
Mlu_01205.mRNA1	225
Mlu_01206.mRNA1	53
Mlu_01207.mRNA1	0
Mlu_01208.mRNA1	0
Mlu_01209.mRNA1	13
Mlu_01210.mRNA1	10
Mlu_01211.mRNA1	751
Mlu_01212.mRNA1	160
Mlu_01213.mRNA1	3
Mlu_01214.mRNA1	86
Mlu_01215.mRNA1	1
Mlu_01216.mRNA1	0
Mlu_01217.mRNA1	0
Mlu_01218.mRNA1	0
Mlu_01219.mRNA1	1
Mlu_01220.mRNA1	1
Mlu_01221.mRNA1	0
Mlu_01222.mRNA1	0
Mlu_01223.mRNA1	4
Mlu_01224.mRNA1	0
Mlu_01225.mRNA1	35
Mlu_01226.mRNA1	37
Mlu_01227.mRNA1	128
Mlu_01228.mRNA1	0
Mlu_01229.mRNA1	0
Mlu_01230.mRNA1	15
Mlu_01231.mRNA1	22
Mlu_01232.mRNA1	97
Mlu_01233.mRNA1	0
Mlu_01234.mRNA1	8
Mlu_01235.mRNA1	0
Mlu_01236.mRNA1	41
Mlu_01237.mRNA1	472
Mlu_01238.mRNA1	24
Mlu_01239.mRNA1	27
Mlu_01240.mRNA1	79
Mlu_01241.mRNA1	170
Mlu_01242.mRNA1	12
Mlu_01243.mRNA1	166
Mlu_01244.mRNA1	106
Mlu_01245.mRNA1	138
Mlu_01246.mRNA1	1
Mlu_01247.mRNA1	163
Mlu_01248.mRNA1	0
Mlu_01249.mRNA1	23
Mlu_01250.mRNA1	61
Mlu_01251.mRNA1	10
Mlu_01252.mRNA1	4
Mlu_01253.mRNA1	109
Mlu_01254.mRNA1	53
Mlu_01255.mRNA1	0
Mlu_01256.mRNA1	11
Mlu_01257.mRNA1	43
Mlu_01258.mRNA1	322
Mlu_01259.mRNA1	79
Mlu_01260.mRNA1	39
Mlu_01261.mRNA1	17
Mlu_01262.mRNA1	55
Mlu_01263.mRNA1	33
Mlu_01264.mRNA1	97
Mlu_01265.mRNA1	15
Mlu_01266.mRNA1	27
Mlu_01267.mRNA1	3
Mlu_01268.mRNA1	78
Mlu_01269.mRNA1	99
Mlu_01270.mRNA1	0
Mlu_01271.mRNA1	1
Mlu_01272.mRNA1	21
Mlu_01273.mRNA1	31
Mlu_01274.mRNA1	0
Mlu_01275.mRNA1	23
Mlu_01276.mRNA1	4
Mlu_01277.mRNA1	52
Mlu_01278.mRNA1	0
Mlu_01279.mRNA1	11
Mlu_01280.mRNA1	0
Mlu_01281.mRNA1	0
Mlu_01282.mRNA1	28
Mlu_01283.mRNA1	118
Mlu_01284.mRNA1	1
Mlu_01285.mRNA1	0
Mlu_01286.mRNA1	3
Mlu_01287.mRNA1	57
Mlu_01288.mRNA1	0
Mlu_01289.mRNA1	70
Mlu_01290.mRNA1	119
Mlu_01291.mRNA1	42
Mlu_01292.mRNA1	1
Mlu_01293.mRNA1	0
Mlu_01294.mRNA1	0
Mlu_01295.mRNA1	0
Mlu_01296.mRNA1	0
Mlu_01297.mRNA1	0
Mlu_01298.mRNA1	77
Mlu_01299.mRNA1	9
Mlu_01300.mRNA1	0
Mlu_01301.mRNA1	0
Mlu_01302.mRNA1	19
Mlu_01303.mRNA1	77
Mlu_01304.mRNA1	0
Mlu_01305.mRNA1	67
Mlu_01306.mRNA1	250
Mlu_01307.mRNA1	0
Mlu_01308.mRNA1	73
Mlu_01309.mRNA1	110
Mlu_01310.mRNA1	1
Mlu_01311.mRNA1	22
Mlu_01312.mRNA1	179
Mlu_01313.mRNA1	368
Mlu_01314.mRNA1	26
Mlu_01315.mRNA1	19
Mlu_01316.mRNA1	238
Mlu_01317.mRNA1	75
Mlu_01318.mRNA1	1
Mlu_01319.mRNA1	125
Mlu_01320.mRNA1	0
Mlu_01321.mRNA1	122
Mlu_01322.mRNA1	38
Mlu_01323.mRNA1	0
Mlu_01324.mRNA1	0
Mlu_01325.mRNA1	2
Mlu_01326.mRNA1	8
Mlu_01327.mRNA1	1
Mlu_01328.mRNA1	40
Mlu_01329.mRNA1	43
Mlu_01330.mRNA1	0
Mlu_01331.mRNA1	171
Mlu_01332.mRNA1	283
Mlu_01333.mRNA1	0
Mlu_01334.mRNA1	39
Mlu_01335.mRNA1	3
Mlu_01336.mRNA1	0
Mlu_01337.mRNA1	0
Mlu_01338.mRNA1	406
Mlu_01339.mRNA1	90
Mlu_01340.mRNA1	0
Mlu_01341.mRNA1	2
Mlu_01342.mRNA1	752
Mlu_01343.mRNA1	0
Mlu_01344.mRNA1	2
Mlu_01345.mRNA1	656
Mlu_01346.mRNA1	8
Mlu_01347.mRNA1	38
Mlu_01348.mRNA1	129
Mlu_01349.mRNA1	0
Mlu_01350.mRNA1	70
Mlu_01351.mRNA1	2
Mlu_01352.mRNA1	0
Mlu_01353.mRNA1	4855
Mlu_01354.mRNA1	0
Mlu_01355.mRNA1	16
Mlu_01356.mRNA1	5
Mlu_01357.mRNA1	88
Mlu_01358.mRNA1	0
Mlu_01359.mRNA1	0
Mlu_01360.mRNA1	0
Mlu_01361.mRNA1	152
Mlu_01362.mRNA1	0
Mlu_01363.mRNA1	0
Mlu_01364.mRNA1	15
Mlu_01365.mRNA1	91
Mlu_01366.mRNA1	67
Mlu_01367.mRNA1	88
Mlu_01368.mRNA1	391
Mlu_01369.mRNA1	56
Mlu_01370.mRNA1	27
Mlu_01371.mRNA1	64
Mlu_01372.mRNA1	113
Mlu_01373.mRNA1	121
Mlu_01374.mRNA1	277
Mlu_01375.mRNA1	75
Mlu_01376.mRNA1	40
Mlu_01377.mRNA1	317
Mlu_01378.mRNA1	80
Mlu_01379.mRNA1	54
Mlu_01380.mRNA1	11
Mlu_01381.mRNA1	12
Mlu_01382.mRNA1	1
Mlu_01383.mRNA1	42
Mlu_01384.mRNA1	125
Mlu_01385.mRNA1	860
Mlu_01386.mRNA1	0
Mlu_01387.mRNA1	8
Mlu_01388.mRNA1	0
Mlu_01389.mRNA1	0
Mlu_01390.mRNA1	0
Mlu_01391.mRNA1	701
Mlu_01392.mRNA1	163
Mlu_01393.mRNA1	39
Mlu_01394.mRNA1	0
Mlu_01395.mRNA1	84
Mlu_01396.mRNA1	218
Mlu_01397.mRNA1	355
Mlu_01398.mRNA1	1
Mlu_01399.mRNA1	336
Mlu_01400.mRNA1	212
Mlu_01401.mRNA1	28
Mlu_01402.mRNA1	0
Mlu_01403.mRNA1	5
Mlu_01404.mRNA1	3
Mlu_01405.mRNA1	0
Mlu_01406.mRNA1	67
Mlu_01407.mRNA1	11
Mlu_01408.mRNA1	556
Mlu_01409.mRNA1	1
Mlu_01410.mRNA1	121
Mlu_01411.mRNA1	85
Mlu_01412.mRNA1	123
Mlu_01413.mRNA1	1
Mlu_01414.mRNA1	271
Mlu_01415.mRNA1	0
Mlu_01416.mRNA1	263
Mlu_01417.mRNA1	3
Mlu_01418.mRNA1	133
Mlu_01419.mRNA1	6
Mlu_01420.mRNA1	151
Mlu_01421.mRNA1	4
Mlu_01422.mRNA1	0
Mlu_01423.mRNA1	0
Mlu_01424.mRNA1	0
Mlu_01425.mRNA1	92
Mlu_01426.mRNA1	244
Mlu_01427.mRNA1	168
Mlu_01428.mRNA1	75
Mlu_01429.mRNA1	1
Mlu_01430.mRNA1	65
Mlu_01431.mRNA1	120
Mlu_01432.mRNA1	69
Mlu_01433.mRNA1	1379
Mlu_01434.mRNA1	43
Mlu_01435.mRNA1	0
Mlu_01436.mRNA1	1
Mlu_01437.mRNA1	12
Mlu_01438.mRNA1	128
Mlu_01439.mRNA1	25
Mlu_01440.mRNA1	1
Mlu_01441.mRNA1	41
Mlu_01442.mRNA1	56
Mlu_01443.mRNA1	13
Mlu_01444.mRNA1	0
Mlu_01445.mRNA1	0
Mlu_01446.mRNA1	26
Mlu_01447.mRNA1	17
Mlu_01448.mRNA1	1
Mlu_01449.mRNA1	116
Mlu_01450.mRNA1	2256
Mlu_01451.mRNA1	54
Mlu_01452.mRNA1	86
Mlu_01453.mRNA1	0
Mlu_01454.mRNA1	0
Mlu_01455.mRNA1	19
Mlu_01456.mRNA1	132
Mlu_01457.mRNA1	128
Mlu_01458.mRNA1	0
Mlu_01459.mRNA1	0
Mlu_01460.mRNA1	98
Mlu_01461.mRNA1	390
Mlu_01462.mRNA1	42
Mlu_01463.mRNA1	2
Mlu_01464.mRNA1	17
Mlu_01465.mRNA1	12
Mlu_01466.mRNA1	106
Mlu_01467.mRNA1	0
Mlu_01468.mRNA1	46
Mlu_01469.mRNA1	3
Mlu_01470.mRNA1	215
Mlu_01471.mRNA1	18
Mlu_01472.mRNA1	220
Mlu_01473.mRNA1	16
Mlu_01474.mRNA1	105
Mlu_01475.mRNA1	9
Mlu_01476.mRNA1	9
Mlu_01477.mRNA1	214
Mlu_01478.mRNA1	171
Mlu_01479.mRNA1	47
Mlu_01480.mRNA1	58
Mlu_01481.mRNA1	161
Mlu_01482.mRNA1	141
Mlu_01483.mRNA1	543
Mlu_01484.mRNA1	210
Mlu_01485.mRNA1	153
Mlu_01486.mRNA1	266
Mlu_01487.mRNA1	0
Mlu_01488.mRNA1	0
Mlu_01489.mRNA1	106
Mlu_01490.mRNA1	8
Mlu_01491.mRNA1	6
Mlu_01492.mRNA1	5
Mlu_01493.mRNA1	0
Mlu_01494.mRNA1	0
Mlu_01495.mRNA1	0
Mlu_01496.mRNA1	0
Mlu_01497.mRNA1	0
Mlu_01498.mRNA1	68
Mlu_01499.mRNA1	0
Mlu_01500.mRNA1	1
Mlu_01501.mRNA1	2
Mlu_01502.mRNA1	0
Mlu_01503.mRNA1	10
Mlu_01504.mRNA1	1
Mlu_01505.mRNA1	0
Mlu_01506.mRNA1	744
Mlu_01507.mRNA1	40
Mlu_01508.mRNA1	85
Mlu_01509.mRNA1	0
Mlu_01510.mRNA1	15
Mlu_01511.mRNA1	0
Mlu_01512.mRNA1	110
Mlu_01513.mRNA1	92
Mlu_01514.mRNA1	1
Mlu_01515.mRNA1	55
Mlu_01516.mRNA1	107
Mlu_01517.mRNA1	668
Mlu_01518.mRNA1	0
Mlu_01519.mRNA1	0
Mlu_01520.mRNA1	31
Mlu_01521.mRNA1	3
Mlu_01522.mRNA1	4
Mlu_01523.mRNA1	151
Mlu_01524.mRNA1	174
Mlu_01525.mRNA1	1
Mlu_01526.mRNA1	52
Mlu_01527.mRNA1	29
Mlu_01528.mRNA1	8
Mlu_01529.mRNA1	48
Mlu_01530.mRNA1	18
Mlu_01531.mRNA1	296
Mlu_01532.mRNA1	0
Mlu_01533.mRNA1	10
Mlu_01534.mRNA1	78
Mlu_01535.mRNA1	83
Mlu_01536.mRNA1	32
Mlu_01537.mRNA1	295
Mlu_01538.mRNA1	48
Mlu_01539.mRNA1	9
Mlu_01540.mRNA1	0
Mlu_01541.mRNA1	0
Mlu_01542.mRNA1	0
Mlu_01543.mRNA1	1
Mlu_01544.mRNA1	36
Mlu_01545.mRNA1	87
Mlu_01546.mRNA1	107
Mlu_01547.mRNA1	191
Mlu_01548.mRNA1	0
Mlu_01549.mRNA1	3
Mlu_01550.mRNA1	400
Mlu_01551.mRNA1	57
Mlu_01552.mRNA1	191
Mlu_01553.mRNA1	0
Mlu_01554.mRNA1	0
Mlu_01555.mRNA1	0
Mlu_01556.mRNA1	0
Mlu_01557.mRNA1	176
Mlu_01558.mRNA1	3
Mlu_01559.mRNA1	279
Mlu_01560.mRNA1	1
Mlu_01561.mRNA1	17
Mlu_01562.mRNA1	306
Mlu_01563.mRNA1	0
Mlu_01564.mRNA1	9
Mlu_01565.mRNA1	1
Mlu_01566.mRNA1	286
Mlu_01567.mRNA1	34
Mlu_01568.mRNA1	15
Mlu_01569.mRNA1	43
Mlu_01570.mRNA1	0
Mlu_01571.mRNA1	1
Mlu_01572.mRNA1	107
Mlu_01573.mRNA1	9
Mlu_01574.mRNA1	18
Mlu_01575.mRNA1	307
Mlu_01576.mRNA1	0
Mlu_01577.mRNA1	0
Mlu_01578.mRNA1	3
Mlu_01579.mRNA1	12
Mlu_01580.mRNA1	199
Mlu_01581.mRNA1	159
Mlu_01582.mRNA1	1
Mlu_01583.mRNA1	29
Mlu_01584.mRNA1	80
Mlu_01585.mRNA1	4
Mlu_01586.mRNA1	0
Mlu_01587.mRNA1	2
Mlu_01588.mRNA1	0
Mlu_01589.mRNA1	0
Mlu_01590.mRNA1	0
Mlu_01591.mRNA1	0
Mlu_01592.mRNA1	0
Mlu_01593.mRNA1	73
Mlu_01594.mRNA1	204
Mlu_01595.mRNA1	0
Mlu_01596.mRNA1	37
Mlu_01597.mRNA1	0
Mlu_01598.mRNA1	0
Mlu_01599.mRNA1	65
Mlu_01600.mRNA1	0
Mlu_01601.mRNA1	45
Mlu_01602.mRNA1	109
Mlu_01603.mRNA1	4
Mlu_01604.mRNA1	32
Mlu_01605.mRNA1	138
Mlu_01606.mRNA1	39
Mlu_01607.mRNA1	2
Mlu_01608.mRNA1	181
Mlu_01609.mRNA1	56
Mlu_01610.mRNA1	42
Mlu_01611.mRNA1	0
Mlu_01612.mRNA1	90
Mlu_01613.mRNA1	0
Mlu_01614.mRNA1	0
Mlu_01615.mRNA1	96
Mlu_01616.mRNA1	20
Mlu_01617.mRNA1	0
Mlu_01618.mRNA1	264
Mlu_01619.mRNA1	82
Mlu_01620.mRNA1	236
Mlu_01621.mRNA1	4
Mlu_01622.mRNA1	0
Mlu_01623.mRNA1	0
Mlu_01624.mRNA1	50
Mlu_01625.mRNA1	0
Mlu_01626.mRNA1	175
Mlu_01627.mRNA1	62
Mlu_01628.mRNA1	21
Mlu_01629.mRNA1	162
Mlu_01630.mRNA1	0
Mlu_01631.mRNA1	0
Mlu_01632.mRNA1	0
Mlu_01633.mRNA1	22
Mlu_01634.mRNA1	14
Mlu_01635.mRNA1	54
Mlu_01636.mRNA1	42
Mlu_01637.mRNA1	1
Mlu_01638.mRNA1	0
Mlu_01639.mRNA1	77
Mlu_01640.mRNA1	225
Mlu_01641.mRNA1	23
Mlu_01642.mRNA1	21
Mlu_01643.mRNA1	1
Mlu_01644.mRNA1	152
Mlu_01645.mRNA1	82
Mlu_01646.mRNA1	114
Mlu_01647.mRNA1	3
Mlu_01648.mRNA1	0
Mlu_01649.mRNA1	21
Mlu_01650.mRNA1	122
Mlu_01651.mRNA1	3
Mlu_01652.mRNA1	0
Mlu_01653.mRNA1	596
Mlu_01654.mRNA1	0
Mlu_01655.mRNA1	14
Mlu_01656.mRNA1	125
Mlu_01657.mRNA1	231
Mlu_01658.mRNA1	811
Mlu_01659.mRNA1	46
Mlu_01660.mRNA1	14
Mlu_01661.mRNA1	10
Mlu_01662.mRNA1	9
Mlu_01663.mRNA1	270
Mlu_01664.mRNA1	59
Mlu_01665.mRNA1	51
Mlu_01666.mRNA1	0
Mlu_01667.mRNA1	0
Mlu_01668.mRNA1	0
Mlu_01669.mRNA1	0
Mlu_01670.mRNA1	1
Mlu_01671.mRNA1	60
Mlu_01672.mRNA1	19
Mlu_01673.mRNA1	1273
Mlu_01674.mRNA1	86
Mlu_01675.mRNA1	95
Mlu_01676.mRNA1	0
Mlu_01677.mRNA1	334
Mlu_01678.mRNA1	966
Mlu_01679.mRNA1	218
Mlu_01680.mRNA1	0
Mlu_01681.mRNA1	269
Mlu_01682.mRNA1	65
Mlu_01683.mRNA1	9
Mlu_01684.mRNA1	1
Mlu_01685.mRNA1	76
Mlu_01686.mRNA1	157
Mlu_01687.mRNA1	80
Mlu_01688.mRNA1	14
Mlu_01689.mRNA1	103
Mlu_01690.mRNA1	39
Mlu_01691.mRNA1	77
Mlu_01692.mRNA1	34
Mlu_01693.mRNA1	76
Mlu_01694.mRNA1	14
Mlu_01695.mRNA1	194
Mlu_01696.mRNA1	337
Mlu_01697.mRNA1	6
Mlu_01698.mRNA1	88
Mlu_01699.mRNA1	72
Mlu_01700.mRNA1	7
Mlu_01701.mRNA1	0
Mlu_01702.mRNA1	54
Mlu_01703.mRNA1	103
Mlu_01704.mRNA1	0
Mlu_01705.mRNA1	0
Mlu_01706.mRNA1	19
Mlu_01707.mRNA1	0
Mlu_01708.mRNA1	0
Mlu_01709.mRNA1	6
Mlu_01710.mRNA1	227
Mlu_01711.mRNA1	0
Mlu_01712.mRNA1	35
Mlu_01713.mRNA1	349
Mlu_01714.mRNA1	101
Mlu_01715.mRNA1	3
Mlu_01716.mRNA1	97
Mlu_01717.mRNA1	56
Mlu_01718.mRNA1	24
Mlu_01719.mRNA1	0
Mlu_01720.mRNA1	0
Mlu_01721.mRNA1	39
Mlu_01722.mRNA1	18
Mlu_01723.mRNA1	8
Mlu_01724.mRNA1	10
Mlu_01725.mRNA1	2
Mlu_01726.mRNA1	44
Mlu_01727.mRNA1	3
Mlu_01728.mRNA1	94
Mlu_01729.mRNA1	40
Mlu_01730.mRNA1	34
Mlu_01731.mRNA1	1
Mlu_01732.mRNA1	0
Mlu_01733.mRNA1	363
Mlu_01734.mRNA1	679
Mlu_01735.mRNA1	0
Mlu_01736.mRNA1	5
Mlu_01737.mRNA1	0
Mlu_01738.mRNA1	56
Mlu_01739.mRNA1	3
Mlu_01740.mRNA1	5
Mlu_01741.mRNA1	0
Mlu_01742.mRNA1	96
Mlu_01743.mRNA1	7
Mlu_01744.mRNA1	43
Mlu_01745.mRNA1	92
Mlu_01746.mRNA1	124
Mlu_01747.mRNA1	127
Mlu_01748.mRNA1	750
Mlu_01749.mRNA1	29
Mlu_01750.mRNA1	12
Mlu_01751.mRNA1	71
Mlu_01752.mRNA1	20
Mlu_01753.mRNA1	0
Mlu_01754.mRNA1	41
Mlu_01755.mRNA1	0
Mlu_01756.mRNA1	0
Mlu_01757.mRNA1	211
Mlu_01758.mRNA1	0
Mlu_01759.mRNA1	76
Mlu_01760.mRNA1	0
Mlu_01761.mRNA1	6
Mlu_01762.mRNA1	2
Mlu_01763.mRNA1	298
Mlu_01764.mRNA1	91
Mlu_01765.mRNA1	0
Mlu_01766.mRNA1	0
Mlu_01767.mRNA1	172
Mlu_01768.mRNA1	61
Mlu_01769.mRNA1	3
Mlu_01770.mRNA1	10
Mlu_01771.mRNA1	11
Mlu_01772.mRNA1	336
Mlu_01773.mRNA1	0
Mlu_01774.mRNA1	0
Mlu_01775.mRNA1	0
Mlu_01776.mRNA1	28
Mlu_01777.mRNA1	0
Mlu_01778.mRNA1	0
Mlu_01779.mRNA1	0
Mlu_01780.mRNA1	0
Mlu_01781.mRNA1	1
Mlu_01782.mRNA1	1
Mlu_01783.mRNA1	1
Mlu_01784.mRNA1	0
Mlu_01785.mRNA1	6
Mlu_01786.mRNA1	0
Mlu_01787.mRNA1	30
Mlu_01788.mRNA1	500
Mlu_01789.mRNA1	429
Mlu_01790.mRNA1	0
Mlu_01791.mRNA1	0
Mlu_01792.mRNA1	450
Mlu_01793.mRNA1	200
Mlu_01794.mRNA1	6
Mlu_01795.mRNA1	0
Mlu_01796.mRNA1	16
Mlu_01797.mRNA1	34
Mlu_01798.mRNA1	15
Mlu_01799.mRNA1	53
Mlu_01800.mRNA1	2
Mlu_01801.mRNA1	74
Mlu_01802.mRNA1	166
Mlu_01803.mRNA1	35
Mlu_01804.mRNA1	1
Mlu_01805.mRNA1	123
Mlu_01806.mRNA1	76
Mlu_01807.mRNA1	14
Mlu_01808.mRNA1	1
Mlu_01809.mRNA1	0
Mlu_01810.mRNA1	47
Mlu_01811.mRNA1	120
Mlu_01812.mRNA1	0
Mlu_01813.mRNA1	43
Mlu_01814.mRNA1	0
Mlu_01815.mRNA1	14
Mlu_01816.mRNA1	36
Mlu_01817.mRNA1	0
Mlu_01818.mRNA1	92
Mlu_01819.mRNA1	254
Mlu_01820.mRNA1	71
Mlu_01821.mRNA1	1
Mlu_01822.mRNA1	40
Mlu_01823.mRNA1	87
Mlu_01824.mRNA1	0
Mlu_01825.mRNA1	0
Mlu_01826.mRNA1	124
Mlu_01827.mRNA1	201
Mlu_01828.mRNA1	77
Mlu_01829.mRNA1	0
Mlu_01830.mRNA1	0
Mlu_01831.mRNA1	0
Mlu_01832.mRNA1	0
Mlu_01833.mRNA1	8
Mlu_01834.mRNA1	45
Mlu_01835.mRNA1	9
Mlu_01836.mRNA1	43
Mlu_01837.mRNA1	22
Mlu_01838.mRNA1	169
Mlu_01839.mRNA1	49
Mlu_01840.mRNA1	38
Mlu_01841.mRNA1	339
Mlu_01842.mRNA1	7
Mlu_01843.mRNA1	0
Mlu_01844.mRNA1	0
Mlu_01845.mRNA1	121
Mlu_01846.mRNA1	594
Mlu_01847.mRNA1	1
Mlu_01848.mRNA1	2
Mlu_01849.mRNA1	79
Mlu_01850.mRNA1	704
Mlu_01851.mRNA1	20
Mlu_01852.mRNA1	1
Mlu_01853.mRNA1	275
Mlu_01854.mRNA1	83
Mlu_01855.mRNA1	203
Mlu_01856.mRNA1	3
Mlu_01857.mRNA1	0
Mlu_01858.mRNA1	153
Mlu_01859.mRNA1	1
Mlu_01860.mRNA1	1
Mlu_01861.mRNA1	88
Mlu_01862.mRNA1	40
Mlu_01863.mRNA1	83
Mlu_01864.mRNA1	22
Mlu_01865.mRNA1	6
Mlu_01866.mRNA1	122
Mlu_01867.mRNA1	0
Mlu_01868.mRNA1	0
Mlu_01869.mRNA1	62
Mlu_01870.mRNA1	146
Mlu_01871.mRNA1	67
Mlu_01872.mRNA1	5
Mlu_01873.mRNA1	0
Mlu_01874.mRNA1	1
Mlu_01875.mRNA1	7
Mlu_01876.mRNA1	1
Mlu_01877.mRNA1	0
Mlu_01878.mRNA1	1118
Mlu_01879.mRNA1	17
Mlu_01880.mRNA1	727
Mlu_01881.mRNA1	379
Mlu_01882.mRNA1	1
Mlu_01883.mRNA1	4
Mlu_01884.mRNA1	11
Mlu_01885.mRNA1	0
Mlu_01886.mRNA1	0
Mlu_01887.mRNA1	14
Mlu_01888.mRNA1	9
Mlu_01889.mRNA1	0
Mlu_01890.mRNA1	0
Mlu_01891.mRNA1	59
Mlu_01892.mRNA1	0
Mlu_01893.mRNA1	0
Mlu_01894.mRNA1	11
Mlu_01895.mRNA1	0
Mlu_01896.mRNA1	23
Mlu_01897.mRNA1	2
Mlu_01898.mRNA1	0
Mlu_01899.mRNA1	28
Mlu_01900.mRNA1	150
Mlu_01901.mRNA1	20
Mlu_01902.mRNA1	241
Mlu_01903.mRNA1	90
Mlu_01904.mRNA1	0
Mlu_01905.mRNA1	36
Mlu_01906.mRNA1	0
Mlu_01907.mRNA1	37
Mlu_01908.mRNA1	51
Mlu_01909.mRNA1	20
Mlu_01910.mRNA1	2
Mlu_01911.mRNA1	0
Mlu_01912.mRNA1	456
Mlu_01913.mRNA1	1458
Mlu_01914.mRNA1	48
Mlu_01915.mRNA1	120
Mlu_01916.mRNA1	832
Mlu_01917.mRNA1	76
Mlu_01918.mRNA1	49
Mlu_01919.mRNA1	0
Mlu_01920.mRNA1	7
Mlu_01921.mRNA1	0
Mlu_01922.mRNA1	86
Mlu_01923.mRNA1	5
Mlu_01924.mRNA1	23
Mlu_01925.mRNA1	0
Mlu_01926.mRNA1	81
Mlu_01927.mRNA1	869
Mlu_01928.mRNA1	32
Mlu_01929.mRNA1	6
Mlu_01930.mRNA1	162
Mlu_01931.mRNA1	58
Mlu_01932.mRNA1	53
Mlu_01933.mRNA1	1
Mlu_01934.mRNA1	0
Mlu_01935.mRNA1	0
Mlu_01936.mRNA1	209
Mlu_01937.mRNA1	0
Mlu_01938.mRNA1	124
Mlu_01939.mRNA1	51
Mlu_01940.mRNA1	144
Mlu_01941.mRNA1	88
Mlu_01942.mRNA1	236
Mlu_01943.mRNA1	0
Mlu_01944.mRNA1	31
Mlu_01945.mRNA1	148
Mlu_01946.mRNA1	3
Mlu_01947.mRNA1	0
Mlu_01948.mRNA1	10
Mlu_01949.mRNA1	0
Mlu_01950.mRNA1	34
Mlu_01951.mRNA1	0
Mlu_01952.mRNA1	0
Mlu_01953.mRNA1	3
Mlu_01954.mRNA1	17
Mlu_01955.mRNA1	0
Mlu_01956.mRNA1	247
Mlu_01957.mRNA1	34
Mlu_01958.mRNA1	70
Mlu_01959.mRNA1	0
Mlu_01960.mRNA1	40
Mlu_01961.mRNA1	17
Mlu_01962.mRNA1	0
Mlu_01963.mRNA1	26
Mlu_01964.mRNA1	0
Mlu_01965.mRNA1	24
Mlu_01966.mRNA1	2
Mlu_01967.mRNA1	48
Mlu_01968.mRNA1	0
Mlu_01969.mRNA1	39
Mlu_01970.mRNA1	69
Mlu_01971.mRNA1	20
Mlu_01972.mRNA1	4
Mlu_01973.mRNA1	2
Mlu_01974.mRNA1	72
Mlu_01975.mRNA1	24
Mlu_01976.mRNA1	479
Mlu_01977.mRNA1	195
Mlu_01978.mRNA1	14
Mlu_01979.mRNA1	18
Mlu_01980.mRNA1	34
Mlu_01981.mRNA1	0
Mlu_01982.mRNA1	74
Mlu_01983.mRNA1	4
Mlu_01984.mRNA1	22
Mlu_01985.mRNA1	2
Mlu_01986.mRNA1	0
Mlu_01987.mRNA1	32
Mlu_01988.mRNA1	0
Mlu_01989.mRNA1	0
Mlu_01990.mRNA1	83
Mlu_01991.mRNA1	0
Mlu_01992.mRNA1	16
Mlu_01993.mRNA1	0
Mlu_01994.mRNA1	276
Mlu_01995.mRNA1	37
Mlu_01996.mRNA1	2
Mlu_01997.mRNA1	15
Mlu_01998.mRNA1	18
Mlu_01999.mRNA1	1
Mlu_02000.mRNA1	15
[truncated: 44,860 more rows]

## Sheet: S2
Mlu_00001.mRNA1	360
Mlu_00002.mRNA1	102
Mlu_00003.mRNA1	0
Mlu_00004.mRNA1	153
Mlu_00005.mRNA1	267
Mlu_00006.mRNA1	184
Mlu_00007.mRNA1	36
Mlu_00008.mRNA1	481
Mlu_00009.mRNA1	553
Mlu_00010.mRNA1	6
Mlu_00011.mRNA1	0
Mlu_00012.mRNA1	166
Mlu_00013.mRNA1	6
Mlu_00014.mRNA1	147
Mlu_00015.mRNA1	2
Mlu_00016.mRNA1	22
Mlu_00017.mRNA1	0
Mlu_00018.mRNA1	16
Mlu_00019.mRNA1	7
Mlu_00020.mRNA1	72
Mlu_00021.mRNA1	16
Mlu_00022.mRNA1	104
Mlu_00023.mRNA1	296
Mlu_00024.mRNA1	0
Mlu_00025.mRNA1	82
Mlu_00026.mRNA1	28
Mlu_00027.mRNA1	223
Mlu_00028.mRNA1	1
Mlu_00029.mRNA1	350
Mlu_00030.mRNA1	345
Mlu_00031.mRNA1	51
Mlu_00032.mRNA1	0
Mlu_00033.mRNA1	152
Mlu_00034.mRNA1	191
Mlu_00035.mRNA1	205
Mlu_00036.mRNA1	539
Mlu_00037.mRNA1	14
Mlu_00038.mRNA1	949
Mlu_00039.mRNA1	43
Mlu_00040.mRNA1	6
Mlu_00041.mRNA1	6
Mlu_00042.mRNA1	0
Mlu_00043.mRNA1	0
Mlu_00044.mRNA1	266
Mlu_00045.mRNA1	337
Mlu_00046.mRNA1	22
Mlu_00047.mRNA1	0
Mlu_00048.mRNA1	80
Mlu_00049.mRNA1	0
Mlu_00050.mRNA1	4587
Mlu_00051.mRNA1	0
Mlu_00052.mRNA1	1
Mlu_00053.mRNA1	2
Mlu_00054.mRNA1	0
Mlu_00055.mRNA1	0
Mlu_00056.mRNA1	0
Mlu_00057.mRNA1	6
Mlu_00058.mRNA1	22
Mlu_00059.mRNA1	146
Mlu_00060.mRNA1	2
Mlu_00061.mRNA1	1064
Mlu_00062.mRNA1	0
Mlu_00063.mRNA1	153
Mlu_00064.mRNA1	162
Mlu_00065.mRNA1	981
Mlu_00066.mRNA1	17
Mlu_00067.mRNA1	3227
Mlu_00068.mRNA1	117
Mlu_00069.mRNA1	0
Mlu_00070.mRNA1	22
Mlu_00071.mRNA1	3
Mlu_00072.mRNA1	178
Mlu_00073.mRNA1	153
Mlu_00074.mRNA1	7
Mlu_00075.mRNA1	0
Mlu_00076.mRNA1	0
Mlu_00077.mRNA1	2
Mlu_00078.mRNA1	0
Mlu_00079.mRNA1	318
Mlu_00080.mRNA1	1
Mlu_00081.mRNA1	272
Mlu_00082.mRNA1	0
Mlu_00083.mRNA1	19
Mlu_00084.mRNA1	159
Mlu_00085.mRNA1	7
Mlu_00086.mRNA1	236
Mlu_00087.mRNA1	267
Mlu_00088.mRNA1	850
Mlu_00089.mRNA1	1788
Mlu_00090.mRNA1	0
Mlu_00091.mRNA1	7
Mlu_00092.mRNA1	348
Mlu_00093.mRNA1	454
Mlu_00094.mRNA1	339
Mlu_00095.mRNA1	5
Mlu_00096.mRNA1	32
Mlu_00097.mRNA1	0
Mlu_00098.mRNA1	0
Mlu_00099.mRNA1	0
Mlu_00100.mRNA1	13
Mlu_00101.mRNA1	1
Mlu_00102.mRNA1	237
Mlu_00103.mRNA1	1
Mlu_00104.mRNA1	978
Mlu_00105.mRNA1	65
Mlu_00106.mRNA1	361
Mlu_00107.mRNA1	7
Mlu_00108.mRNA1	1016
Mlu_00109.mRNA1	848
Mlu_00110.mRNA1	65
Mlu_00111.mRNA1	668
Mlu_00112.mRNA1	27
Mlu_00113.mRNA1	17
Mlu_00114.mRNA1	323
Mlu_00115.mRNA1	87
Mlu_00116.mRNA1	409
Mlu_00117.mRNA1	57
Mlu_00118.mRNA1	174
Mlu_00119.mRNA1	23
Mlu_00120.mRNA1	309
Mlu_00121.mRNA1	56
Mlu_00122.mRNA1	167
Mlu_00123.mRNA1	306
Mlu_00124.mRNA1	55
Mlu_00125.mRNA1	106
Mlu_00126.mRNA1	74
Mlu_00127.mRNA1	376
Mlu_00128.mRNA1	651
Mlu_00129.mRNA1	1718
Mlu_00130.mRNA1	37
Mlu_00131.mRNA1	185
Mlu_00132.mRNA1	410
Mlu_00133.mRNA1	8
Mlu_00134.mRNA1	30
Mlu_00135.mRNA1	3
Mlu_00136.mRNA1	1
Mlu_00137.mRNA1	0
Mlu_00138.mRNA1	35
Mlu_00139.mRNA1	0
Mlu_00140.mRNA1	176
Mlu_00141.mRNA1	43
Mlu_00142.mRNA1	129
Mlu_00143.mRNA1	161
Mlu_00144.mRNA1	172
Mlu_00145.mRNA1	0
Mlu_00146.mRNA1	0
Mlu_00147.mRNA1	29
Mlu_00148.mRNA1	0
Mlu_00149.mRNA1	16
Mlu_00150.mRNA1	149
Mlu_00151.mRNA1	18
Mlu_00152.mRNA1	208
Mlu_00153.mRNA1	0
Mlu_00154.mRNA1	418
Mlu_00155.mRNA1	150
Mlu_00156.mRNA1	5062
Mlu_00157.mRNA1	29
Mlu_00158.mRNA1	0
Mlu_00159.mRNA1	0
Mlu_00160.mRNA1	493
Mlu_00161.mRNA1	2
Mlu_00162.mRNA1	0
Mlu_00163.mRNA1	292
Mlu_00164.mRNA1	692
Mlu_00165.mRNA1	36
Mlu_00166.mRNA1	129
Mlu_00167.mRNA1	0
Mlu_00168.mRNA1	1
Mlu_00169.mRNA1	114
Mlu_00170.mRNA1	120
Mlu_00171.mRNA1	443
Mlu_00172.mRNA1	62
Mlu_00173.mRNA1	49
Mlu_00174.mRNA1	76
Mlu_00175.mRNA1	318
Mlu_00176.mRNA1	76
Mlu_00177.mRNA1	520
Mlu_00178.mRNA1	7
Mlu_00179.mRNA1	257
Mlu_00180.mRNA1	30
Mlu_00181.mRNA1	7
Mlu_00182.mRNA1	2
Mlu_00183.mRNA1	0
Mlu_00184.mRNA1	0
Mlu_00185.mRNA1	0
Mlu_00186.mRNA1	341
Mlu_00187.mRNA1	691
Mlu_00188.mRNA1	2047
Mlu_00189.mRNA1	330
Mlu_00190.mRNA1	157
Mlu_00191.mRNA1	22
Mlu_00192.mRNA1	11
Mlu_00193.mRNA1	5
Mlu_00194.mRNA1	2
Mlu_00195.mRNA1	548
Mlu_00196.mRNA1	370
Mlu_00197.mRNA1	8
Mlu_00198.mRNA1	2
Mlu_00199.mRNA1	1
Mlu_00200.mRNA1	85
Mlu_00201.mRNA1	311
Mlu_00202.mRNA1	64
Mlu_00203.mRNA1	58
Mlu_00204.mRNA1	0
Mlu_00205.mRNA1	20
Mlu_00206.mRNA1	76
Mlu_00207.mRNA1	0
Mlu_00208.mRNA1	340
Mlu_00209.mRNA1	124
Mlu_00210.mRNA1	11
Mlu_00211.mRNA1	10
Mlu_00212.mRNA1	38
Mlu_00213.mRNA1	191
Mlu_00214.mRNA1	4
Mlu_00215.mRNA1	477
Mlu_00216.mRNA1	168
Mlu_00217.mRNA1	101
Mlu_00218.mRNA1	219
Mlu_00219.mRNA1	117
Mlu_00220.mRNA1	66
Mlu_00221.mRNA1	1
Mlu_00222.mRNA1	232
Mlu_00223.mRNA1	44
Mlu_00224.mRNA1	181
Mlu_00225.mRNA1	606
Mlu_00226.mRNA1	32
Mlu_00227.mRNA1	1370
Mlu_00228.mRNA1	9
Mlu_00229.mRNA1	68
Mlu_00230.mRNA1	107
Mlu_00231.mRNA1	0
Mlu_00232.mRNA1	0
Mlu_00233.mRNA1	5
Mlu_00234.mRNA1	0
Mlu_00235.mRNA1	161
Mlu_00236.mRNA1	122
Mlu_00237.mRNA1	791
Mlu_00238.mRNA1	255
Mlu_00239.mRNA1	0
Mlu_00240.mRNA1	2
Mlu_00241.mRNA1	247
Mlu_00242.mRNA1	1
Mlu_00243.mRNA1	0
Mlu_00244.mRNA1	1
Mlu_00245.mRNA1	443
Mlu_00246.mRNA1	159
Mlu_00247.mRNA1	887
Mlu_00248.mRNA1	118
Mlu_00249.mRNA1	211
Mlu_00250.mRNA1	110
Mlu_00251.mRNA1	4041
Mlu_00252.mRNA1	991
Mlu_00253.mRNA1	654
Mlu_00254.mRNA1	318
Mlu_00255.mRNA1	2006
Mlu_00256.mRNA1	7
Mlu_00257.mRNA1	1975
Mlu_00258.mRNA1	290
Mlu_00259.mRNA1	0
Mlu_00260.mRNA1	1
Mlu_00261.mRNA1	212
Mlu_00262.mRNA1	2062
Mlu_00263.mRNA1	562
Mlu_00264.mRNA1	3
Mlu_00265.mRNA1	1
Mlu_00266.mRNA1	130
Mlu_00267.mRNA1	7
Mlu_00268.mRNA1	2570
Mlu_00269.mRNA1	1539
Mlu_00270.mRNA1	157
Mlu_00271.mRNA1	2719
Mlu_00272.mRNA1	59
Mlu_00273.mRNA1	3007
Mlu_00274.mRNA1	0
Mlu_00275.mRNA1	7
Mlu_00276.mRNA1	158
Mlu_00277.mRNA1	0
Mlu_00278.mRNA1	31
Mlu_00279.mRNA1	2
Mlu_00280.mRNA1	3
Mlu_00281.mRNA1	5
Mlu_00282.mRNA1	104
Mlu_00283.mRNA1	0
Mlu_00284.mRNA1	669
Mlu_00285.mRNA1	231
Mlu_00286.mRNA1	211
Mlu_00287.mRNA1	197
Mlu_00288.mRNA1	449
Mlu_00289.mRNA1	8
Mlu_00290.mRNA1	0
Mlu_00291.mRNA1	162
Mlu_00292.mRNA1	1
Mlu_00293.mRNA1	330
Mlu_00294.mRNA1	1
Mlu_00295.mRNA1	32
Mlu_00296.mRNA1	676
Mlu_00297.mRNA1	0
Mlu_00298.mRNA1	313
Mlu_00299.mRNA1	2389
Mlu_00300.mRNA1	63
Mlu_00301.mRNA1	168
Mlu_00302.mRNA1	551
Mlu_00303.mRNA1	77
Mlu_00304.mRNA1	901
Mlu_00305.mRNA1	554
Mlu_00306.mRNA1	52
Mlu_00307.mRNA1	0
Mlu_00308.mRNA1	174
Mlu_00309.mRNA1	187
Mlu_00310.mRNA1	0
Mlu_00311.mRNA1	180
Mlu_00312.mRNA1	552
Mlu_00313.mRNA1	3
Mlu_00314.mRNA1	0
Mlu_00315.mRNA1	263
Mlu_00316.mRNA1	0
Mlu_00317.mRNA1	3
Mlu_00318.mRNA1	365
Mlu_00319.mRNA1	0
Mlu_00320.mRNA1	17
Mlu_00321.mRNA1	2
Mlu_00322.mRNA1	95
Mlu_00323.mRNA1	277
Mlu_00324.mRNA1	2085
Mlu_00325.mRNA1	47
Mlu_00326.mRNA1	1172
Mlu_00327.mRNA1	231
Mlu_00328.mRNA1	0
Mlu_00329.mRNA1	262
Mlu_00330.mRNA1	0
Mlu_00331.mRNA1	90
Mlu_00332.mRNA1	0
Mlu_00333.mRNA1	0
Mlu_00334.mRNA1	102
Mlu_00335.mRNA1	0
Mlu_00336.mRNA1	81
Mlu_00337.mRNA1	119
Mlu_00338.mRNA1	0
Mlu_00339.mRNA1	11
Mlu_00340.mRNA1	599
Mlu_00341.mRNA1	2759
Mlu_00342.mRNA1	427
Mlu_00343.mRNA1	66
Mlu_00344.mRNA1	204
Mlu_00345.mRNA1	64
Mlu_00346.mRNA1	84
Mlu_00347.mRNA1	3
Mlu_00348.mRNA1	111
Mlu_00349.mRNA1	709
Mlu_00350.mRNA1	3
Mlu_00351.mRNA1	2
Mlu_00352.mRNA1	8
Mlu_00353.mRNA1	384
Mlu_00354.mRNA1	2
Mlu_00355.mRNA1	90
Mlu_00356.mRNA1	1
Mlu_00357.mRNA1	0
Mlu_00358.mRNA1	15
Mlu_00359.mRNA1	226
Mlu_00360.mRNA1	1
Mlu_00361.mRNA1	13
Mlu_00362.mRNA1	908
Mlu_00363.mRNA1	71
Mlu_00364.mRNA1	168
Mlu_00365.mRNA1	90
Mlu_00366.mRNA1	0
Mlu_00367.mRNA1	214
Mlu_00368.mRNA1	711
Mlu_00369.mRNA1	413
Mlu_00370.mRNA1	330
Mlu_00371.mRNA1	0
Mlu_00372.mRNA1	278
Mlu_00373.mRNA1	167
Mlu_00374.mRNA1	11
Mlu_00375.mRNA1	863
Mlu_00376.mRNA1	32
Mlu_00377.mRNA1	185
Mlu_00378.mRNA1	174
Mlu_00379.mRNA1	1061
Mlu_00380.mRNA1	192
Mlu_00381.mRNA1	675
Mlu_00382.mRNA1	27
Mlu_00383.mRNA1	98
Mlu_00384.mRNA1	0
Mlu_00385.mRNA1	12
Mlu_00386.mRNA1	13
Mlu_00387.mRNA1	465
Mlu_00388.mRNA1	0
Mlu_00389.mRNA1	99
Mlu_00390.mRNA1	9
Mlu_00391.mRNA1	263
Mlu_00392.mRNA1	71
Mlu_00393.mRNA1	137
Mlu_00394.mRNA1	650
Mlu_00395.mRNA1	283
Mlu_00396.mRNA1	120
Mlu_00397.mRNA1	257
Mlu_00398.mRNA1	114
Mlu_00399.mRNA1	338
Mlu_00400.mRNA1	68
Mlu_00401.mRNA1	169
Mlu_00402.mRNA1	10
Mlu_00403.mRNA1	165
Mlu_00404.mRNA1	0
Mlu_00405.mRNA1	1069
Mlu_00406.mRNA1	371
Mlu_00407.mRNA1	28
Mlu_00408.mRNA1	83
Mlu_00409.mRNA1	0
Mlu_00410.mRNA1	91
Mlu_00411.mRNA1	233
Mlu_00412.mRNA1	700
Mlu_00413.mRNA1	0
Mlu_00414.mRNA1	105
Mlu_00415.mRNA1	0
Mlu_00416.mRNA1	174
Mlu_00417.mRNA1	43
Mlu_00418.mRNA1	125
Mlu_00419.mRNA1	581
Mlu_00420.mRNA1	252
Mlu_00421.mRNA1	48
Mlu_00422.mRNA1	3
Mlu_00423.mRNA1	236
Mlu_00424.mRNA1	57
Mlu_00425.mRNA1	1
Mlu_00426.mRNA1	17
Mlu_00427.mRNA1	0
Mlu_00428.mRNA1	8
Mlu_00429.mRNA1	23
Mlu_00430.mRNA1	259
Mlu_00431.mRNA1	1
Mlu_00432.mRNA1	131
Mlu_00433.mRNA1	6
Mlu_00434.mRNA1	71
Mlu_00435.mRNA1	105
Mlu_00436.mRNA1	571
Mlu_00437.mRNA1	74
Mlu_00438.mRNA1	13
Mlu_00439.mRNA1	28
Mlu_00440.mRNA1	422
Mlu_00441.mRNA1	576
Mlu_00442.mRNA1	39
Mlu_00443.mRNA1	47
Mlu_00444.mRNA1	169
Mlu_00445.mRNA1	0
Mlu_00446.mRNA1	0
Mlu_00447.mRNA1	1
Mlu_00448.mRNA1	4629
Mlu_00449.mRNA1	0
Mlu_00450.mRNA1	1
Mlu_00451.mRNA1	1163
Mlu_00452.mRNA1	33
Mlu_00453.mRNA1	1285
Mlu_00454.mRNA1	170
Mlu_00455.mRNA1	335
Mlu_00456.mRNA1	204
Mlu_00457.mRNA1	3
Mlu_00458.mRNA1	1
Mlu_00459.mRNA1	87
Mlu_00460.mRNA1	21
Mlu_00461.mRNA1	164
Mlu_00462.mRNA1	20
Mlu_00463.mRNA1	202
Mlu_00464.mRNA1	25
Mlu_00465.mRNA1	342
Mlu_00466.mRNA1	0
Mlu_00467.mRNA1	27
Mlu_00468.mRNA1	122
Mlu_00469.mRNA1	201
Mlu_00470.mRNA1	219
Mlu_00471.mRNA1	332
Mlu_00472.mRNA1	28
Mlu_00473.mRNA1	468
Mlu_00474.mRNA1	8
Mlu_00475.mRNA1	160
Mlu_00476.mRNA1	6824
Mlu_00477.mRNA1	70
Mlu_00478.mRNA1	0
Mlu_00479.mRNA1	0
Mlu_00480.mRNA1	440
Mlu_00481.mRNA1	588
Mlu_00482.mRNA1	3531
Mlu_00483.mRNA1	40
Mlu_00484.mRNA1	478
Mlu_00485.mRNA1	0
Mlu_00486.mRNA1	181
Mlu_00487.mRNA1	116
Mlu_00488.mRNA1	2336
Mlu_00489.mRNA1	963
Mlu_00490.mRNA1	110
Mlu_00491.mRNA1	172
Mlu_00492.mRNA1	67
Mlu_00493.mRNA1	1450
Mlu_00494.mRNA1	194
Mlu_00495.mRNA1	2
Mlu_00496.mRNA1	0
Mlu_00497.mRNA1	95
Mlu_00498.mRNA1	0
Mlu_00499.mRNA1	80
Mlu_00500.mRNA1	8
Mlu_00501.mRNA1	138
Mlu_00502.mRNA1	8
Mlu_00503.mRNA1	324
Mlu_00504.mRNA1	84
Mlu_00505.mRNA1	0
Mlu_00506.mRNA1	0
Mlu_00507.mRNA1	45
Mlu_00508.mRNA1	0
Mlu_00509.mRNA1	259
Mlu_00510.mRNA1	535
Mlu_00511.mRNA1	46
Mlu_00512.mRNA1	675
Mlu_00513.mRNA1	0
Mlu_00514.mRNA1	825
Mlu_00515.mRNA1	762
Mlu_00516.mRNA1	63
Mlu_00517.mRNA1	0
Mlu_00518.mRNA1	4
Mlu_00519.mRNA1	281
Mlu_00520.mRNA1	30
Mlu_00521.mRNA1	620
Mlu_00522.mRNA1	143
Mlu_00523.mRNA1	26
Mlu_00524.mRNA1	3
Mlu_00525.mRNA1	1332
Mlu_00526.mRNA1	0
Mlu_00527.mRNA1	0
Mlu_00528.mRNA1	131
Mlu_00529.mRNA1	91
Mlu_00530.mRNA1	0
Mlu_00531.mRNA1	0
Mlu_00532.mRNA1	6
Mlu_00533.mRNA1	49
Mlu_00534.mRNA1	485
Mlu_00535.mRNA1	50
Mlu_00536.mRNA1	14
Mlu_00537.mRNA1	43
Mlu_00538.mRNA1	1489
Mlu_00539.mRNA1	161
Mlu_00540.mRNA1	0
Mlu_00541.mRNA1	20
Mlu_00542.mRNA1	10
Mlu_00543.mRNA1	179
Mlu_00544.mRNA1	586
Mlu_00545.mRNA1	4
Mlu_00546.mRNA1	2
Mlu_00547.mRNA1	18
Mlu_00548.mRNA1	0
Mlu_00549.mRNA1	0
Mlu_00550.mRNA1	49
Mlu_00551.mRNA1	297
Mlu_00552.mRNA1	2490
Mlu_00553.mRNA1	3
Mlu_00554.mRNA1	730
Mlu_00555.mRNA1	10
Mlu_00556.mRNA1	0
Mlu_00557.mRNA1	0
Mlu_00558.mRNA1	47
Mlu_00559.mRNA1	0
Mlu_00560.mRNA1	332
Mlu_00561.mRNA1	217
Mlu_00562.mRNA1	1688
Mlu_00563.mRNA1	18
Mlu_00564.mRNA1	0
Mlu_00565.mRNA1	0
Mlu_00566.mRNA1	28
Mlu_00567.mRNA1	35
Mlu_00568.mRNA1	59
Mlu_00569.mRNA1	94
Mlu_00570.mRNA1	59
Mlu_00571.mRNA1	1117
Mlu_00572.mRNA1	142
Mlu_00573.mRNA1	35
Mlu_00574.mRNA1	283
Mlu_00575.mRNA1	107
Mlu_00576.mRNA1	3
Mlu_00577.mRNA1	1
Mlu_00578.mRNA1	642
Mlu_00579.mRNA1	8
Mlu_00580.mRNA1	56
Mlu_00581.mRNA1	444
Mlu_00582.mRNA1	2
Mlu_00583.mRNA1	67
Mlu_00584.mRNA1	219
Mlu_00585.mRNA1	110
Mlu_00586.mRNA1	153
Mlu_00587.mRNA1	940
Mlu_00588.mRNA1	0
Mlu_00589.mRNA1	16
Mlu_00590.mRNA1	33
Mlu_00591.mRNA1	1671
Mlu_00592.mRNA1	1
Mlu_00593.mRNA1	25
Mlu_00594.mRNA1	484
Mlu_00595.mRNA1	11
Mlu_00596.mRNA1	0
Mlu_00597.mRNA1	0
Mlu_00598.mRNA1	9
Mlu_00599.mRNA1	62
Mlu_00600.mRNA1	579
Mlu_00601.mRNA1	3733
Mlu_00602.mRNA1	1
Mlu_00603.mRNA1	526
Mlu_00604.mRNA1	42
Mlu_00605.mRNA1	337
Mlu_00606.mRNA1	86
Mlu_00607.mRNA1	10
Mlu_00608.mRNA1	614
Mlu_00609.mRNA1	55
Mlu_00610.mRNA1	68
Mlu_00611.mRNA1	0
Mlu_00612.mRNA1	5
Mlu_00613.mRNA1	24
Mlu_00614.mRNA1	1686
Mlu_00615.mRNA1	484
Mlu_00616.mRNA1	0
Mlu_00617.mRNA1	291
Mlu_00618.mRNA1	1
Mlu_00619.mRNA1	2
Mlu_00620.mRNA1	500
Mlu_00621.mRNA1	514
Mlu_00622.mRNA1	1030
Mlu_00623.mRNA1	12
Mlu_00624.mRNA1	1372
Mlu_00625.mRNA1	10
Mlu_00626.mRNA1	11
Mlu_00627.mRNA1	856
Mlu_00628.mRNA1	0
Mlu_00629.mRNA1	0
Mlu_00630.mRNA1	9
Mlu_00631.mRNA1	241
Mlu_00632.mRNA1	66
Mlu_00633.mRNA1	35
Mlu_00634.mRNA1	0
Mlu_00635.mRNA1	547
Mlu_00636.mRNA1	390
Mlu_00637.mRNA1	94
Mlu_00638.mRNA1	451
Mlu_00639.mRNA1	5
Mlu_00640.mRNA1	184
Mlu_00641.mRNA1	0
Mlu_00642.mRNA1	65
Mlu_00643.mRNA1	34
Mlu_00644.mRNA1	254
Mlu_00645.mRNA1	52
Mlu_00646.mRNA1	262
Mlu_00647.mRNA1	251
Mlu_00648.mRNA1	133
Mlu_00649.mRNA1	593
Mlu_00650.mRNA1	289
Mlu_00651.mRNA1	248
Mlu_00652.mRNA1	554
Mlu_00653.mRNA1	171
Mlu_00654.mRNA1	0
Mlu_00655.mRNA1	0
Mlu_00656.mRNA1	60
Mlu_00657.mRNA1	0
Mlu_00658.mRNA1	6
Mlu_00659.mRNA1	2671
Mlu_00660.mRNA1	27
Mlu_00661.mRNA1	36
Mlu_00662.mRNA1	82
Mlu_00663.mRNA1	0
Mlu_00664.mRNA1	42
Mlu_00665.mRNA1	0
Mlu_00666.mRNA1	23
Mlu_00667.mRNA1	44
Mlu_00668.mRNA1	9
Mlu_00669.mRNA1	1
Mlu_00670.mRNA1	0
Mlu_00671.mRNA1	177
Mlu_00672.mRNA1	15
Mlu_00673.mRNA1	0
Mlu_00674.mRNA1	4
Mlu_00675.mRNA1	1
Mlu_00676.mRNA1	110
Mlu_00677.mRNA1	131
Mlu_00678.mRNA1	4
Mlu_00679.mRNA1	369
Mlu_00680.mRNA1	363
Mlu_00681.mRNA1	66
Mlu_00682.mRNA1	289
Mlu_00683.mRNA1	536
Mlu_00684.mRNA1	1
Mlu_00685.mRNA1	29
Mlu_00686.mRNA1	796
Mlu_00687.mRNA1	1525
Mlu_00688.mRNA1	115
Mlu_00689.mRNA1	9
Mlu_00690.mRNA1	0
Mlu_00691.mRNA1	0
Mlu_00692.mRNA1	0
Mlu_00693.mRNA1	0
Mlu_00694.mRNA1	115
Mlu_00695.mRNA1	231
Mlu_00696.mRNA1	162
Mlu_00697.mRNA1	0
Mlu_00698.mRNA1	92
Mlu_00699.mRNA1	0
Mlu_00700.mRNA1	146
Mlu_00701.mRNA1	21
Mlu_00702.mRNA1	0
Mlu_00703.mRNA1	19
Mlu_00704.mRNA1	934
Mlu_00705.mRNA1	201
Mlu_00706.mRNA1	643
Mlu_00707.mRNA1	35
Mlu_00708.mRNA1	100
Mlu_00709.mRNA1	147
Mlu_00710.mRNA1	23
Mlu_00711.mRNA1	11
Mlu_00712.mRNA1	13
Mlu_00713.mRNA1	358
Mlu_00714.mRNA1	384
Mlu_00715.mRNA1	1
Mlu_00716.mRNA1	178
Mlu_00717.mRNA1	35
Mlu_00718.mRNA1	91
Mlu_00719.mRNA1	138
Mlu_00720.mRNA1	32
Mlu_00721.mRNA1	214
Mlu_00722.mRNA1	5633
Mlu_00723.mRNA1	12
Mlu_00724.mRNA1	132
Mlu_00725.mRNA1	1063
Mlu_00726.mRNA1	0
Mlu_00727.mRNA1	27
Mlu_00728.mRNA1	0
Mlu_00729.mRNA1	0
Mlu_00730.mRNA1	36
Mlu_00731.mRNA1	645
Mlu_00732.mRNA1	0
Mlu_00733.mRNA1	38
Mlu_00734.mRNA1	34
Mlu_00735.mRNA1	0
Mlu_00736.mRNA1	242
Mlu_00737.mRNA1	900
Mlu_00738.mRNA1	165
Mlu_00739.mRNA1	242
Mlu_00740.mRNA1	0
Mlu_00741.mRNA1	0
Mlu_00742.mRNA1	1
Mlu_00743.mRNA1	439
Mlu_00744.mRNA1	62
Mlu_00745.mRNA1	333
Mlu_00746.mRNA1	10
Mlu_00747.mRNA1	54
Mlu_00748.mRNA1	11
Mlu_00749.mRNA1	3
Mlu_00750.mRNA1	0
Mlu_00751.mRNA1	0
Mlu_00752.mRNA1	0
Mlu_00753.mRNA1	1047
Mlu_00754.mRNA1	0
Mlu_00755.mRNA1	102
Mlu_00756.mRNA1	151
Mlu_00757.mRNA1	33
Mlu_00758.mRNA1	113
Mlu_00759.mRNA1	117
Mlu_00760.mRNA1	428
Mlu_00761.mRNA1	280
Mlu_00762.mRNA1	1
Mlu_00763.mRNA1	36
Mlu_00764.mRNA1	67
Mlu_00765.mRNA1	2355
Mlu_00766.mRNA1	1074
Mlu_00767.mRNA1	276
Mlu_00768.mRNA1	327
Mlu_00769.mRNA1	0
Mlu_00770.mRNA1	829
Mlu_00771.mRNA1	339
Mlu_00772.mRNA1	80
Mlu_00773.mRNA1	1
Mlu_00774.mRNA1	0
Mlu_00775.mRNA1	322
Mlu_00776.mRNA1	2
Mlu_00777.mRNA1	152
Mlu_00778.mRNA1	74
Mlu_00779.mRNA1	513
Mlu_00780.mRNA1	493
Mlu_00781.mRNA1	2
Mlu_00782.mRNA1	0
Mlu_00783.mRNA1	458
Mlu_00784.mRNA1	668
Mlu_00785.mRNA1	2
Mlu_00786.mRNA1	0
Mlu_00787.mRNA1	0
Mlu_00788.mRNA1	2
Mlu_00789.mRNA1	344
Mlu_00790.mRNA1	0
Mlu_00791.mRNA1	0
Mlu_00792.mRNA1	26
Mlu_00793.mRNA1	188
Mlu_00794.mRNA1	0
Mlu_00795.mRNA1	0
Mlu_00796.mRNA1	262
Mlu_00797.mRNA1	0
Mlu_00798.mRNA1	1789
Mlu_00799.mRNA1	43
Mlu_00800.mRNA1	0
Mlu_00801.mRNA1	0
Mlu_00802.mRNA1	191
Mlu_00803.mRNA1	12
Mlu_00804.mRNA1	962
Mlu_00805.mRNA1	218
Mlu_00806.mRNA1	89
Mlu_00807.mRNA1	546
Mlu_00808.mRNA1	169
Mlu_00809.mRNA1	392
Mlu_00810.mRNA1	138
Mlu_00811.mRNA1	133
Mlu_00812.mRNA1	2
Mlu_00813.mRNA1	0
Mlu_00814.mRNA1	947
Mlu_00815.mRNA1	364
Mlu_00816.mRNA1	22
Mlu_00817.mRNA1	570
Mlu_00818.mRNA1	1698
Mlu_00819.mRNA1	69
Mlu_00820.mRNA1	9
Mlu_00821.mRNA1	155
Mlu_00822.mRNA1	14
Mlu_00823.mRNA1	125
Mlu_00824.mRNA1	238
Mlu_00825.mRNA1	23
Mlu_00826.mRNA1	937
Mlu_00827.mRNA1	113
Mlu_00828.mRNA1	938
Mlu_00829.mRNA1	907
Mlu_00830.mRNA1	1
Mlu_00831.mRNA1	73
Mlu_00832.mRNA1	42
Mlu_00833.mRNA1	905
Mlu_00834.mRNA1	164
Mlu_00835.mRNA1	155
Mlu_00836.mRNA1	30
Mlu_00837.mRNA1	3
Mlu_00838.mRNA1	211
Mlu_00839.mRNA1	0
Mlu_00840.mRNA1	25
Mlu_00841.mRNA1	79
Mlu_00842.mRNA1	350
Mlu_00843.mRNA1	0
Mlu_00844.mRNA1	0
Mlu_00845.mRNA1	19
Mlu_00846.mRNA1	18
Mlu_00847.mRNA1	446
Mlu_00848.mRNA1	0
Mlu_00849.mRNA1	0
Mlu_00850.mRNA1	47
Mlu_00851.mRNA1	2
Mlu_00852.mRNA1	1
Mlu_00853.mRNA1	0
Mlu_00854.mRNA1	29
Mlu_00855.mRNA1	32
Mlu_00856.mRNA1	93
Mlu_00857.mRNA1	13
Mlu_00858.mRNA1	111
Mlu_00859.mRNA1	2
Mlu_00860.mRNA1	218
Mlu_00861.mRNA1	161
Mlu_00862.mRNA1	19
Mlu_00863.mRNA1	0
Mlu_00864.mRNA1	83
Mlu_00865.mRNA1	201
Mlu_00866.mRNA1	35
Mlu_00867.mRNA1	1172
Mlu_00868.mRNA1	117
Mlu_00869.mRNA1	164
Mlu_00870.mRNA1	0
Mlu_00871.mRNA1	51
Mlu_00872.mRNA1	1
Mlu_00873.mRNA1	1452
Mlu_00874.mRNA1	0
Mlu_00875.mRNA1	222
Mlu_00876.mRNA1	0
Mlu_00877.mRNA1	172
Mlu_00878.mRNA1	984
Mlu_00879.mRNA1	1739
Mlu_00880.mRNA1	63
Mlu_00881.mRNA1	98
Mlu_00882.mRNA1	63
Mlu_00883.mRNA1	245
Mlu_00884.mRNA1	119
Mlu_00885.mRNA1	210
Mlu_00886.mRNA1	598
Mlu_00887.mRNA1	122
Mlu_00888.mRNA1	23
Mlu_00889.mRNA1	68
Mlu_00890.mRNA1	0
Mlu_00891.mRNA1	63
Mlu_00892.mRNA1	184
Mlu_00893.mRNA1	173
Mlu_00894.mRNA1	621
Mlu_00895.mRNA1	232
Mlu_00896.mRNA1	0
Mlu_00897.mRNA1	134
Mlu_00898.mRNA1	0
Mlu_00899.mRNA1	40
Mlu_00900.mRNA1	20
Mlu_00901.mRNA1	365
Mlu_00902.mRNA1	0
Mlu_00903.mRNA1	181
Mlu_00904.mRNA1	0
Mlu_00905.mRNA1	663
Mlu_00906.mRNA1	16
Mlu_00907.mRNA1	1
Mlu_00908.mRNA1	0
Mlu_00909.mRNA1	33
Mlu_00910.mRNA1	0
Mlu_00911.mRNA1	20
Mlu_00912.mRNA1	37
Mlu_00913.mRNA1	86
Mlu_00914.mRNA1	212
Mlu_00915.mRNA1	0
Mlu_00916.mRNA1	140
Mlu_00917.mRNA1	1
Mlu_00918.mRNA1	0
Mlu_00919.mRNA1	6
Mlu_00920.mRNA1	1
Mlu_00921.mRNA1	602
Mlu_00922.mRNA1	833
Mlu_00923.mRNA1	987
Mlu_00924.mRNA1	175
Mlu_00925.mRNA1	293
Mlu_00926.mRNA1	0
Mlu_00927.mRNA1	360
Mlu_00928.mRNA1	96
Mlu_00929.mRNA1	1
Mlu_00930.mRNA1	0
Mlu_00931.mRNA1	0
Mlu_00932.mRNA1	0
Mlu_00933.mRNA1	0
Mlu_00934.mRNA1	230
Mlu_00935.mRNA1	0
Mlu_00936.mRNA1	0
Mlu_00937.mRNA1	0
Mlu_00938.mRNA1	6
Mlu_00939.mRNA1	3
Mlu_00940.mRNA1	119
Mlu_00941.mRNA1	374
Mlu_00942.mRNA1	385
Mlu_00943.mRNA1	1607
Mlu_00944.mRNA1	222
Mlu_00945.mRNA1	31
Mlu_00946.mRNA1	369
Mlu_00947.mRNA1	254
Mlu_00948.mRNA1	13
Mlu_00949.mRNA1	1241
Mlu_00950.mRNA1	9
Mlu_00951.mRNA1	485
Mlu_00952.mRNA1	1
Mlu_00953.mRNA1	3
Mlu_00954.mRNA1	16
Mlu_00955.mRNA1	2942
Mlu_00956.mRNA1	60
Mlu_00957.mRNA1	3
Mlu_00958.mRNA1	0
Mlu_00959.mRNA1	0
Mlu_00960.mRNA1	93
Mlu_00961.mRNA1	423
Mlu_00962.mRNA1	109
Mlu_00963.mRNA1	371
Mlu_00964.mRNA1	17
Mlu_00965.mRNA1	80
Mlu_00966.mRNA1	741
Mlu_00967.mRNA1	66
Mlu_00968.mRNA1	65
Mlu_00969.mRNA1	84
Mlu_00970.mRNA1	15
Mlu_00971.mRNA1	830
Mlu_00972.mRNA1	124
Mlu_00973.mRNA1	155
Mlu_00974.mRNA1	104
Mlu_00975.mRNA1	9
Mlu_00976.mRNA1	168
Mlu_00977.mRNA1	345
Mlu_00978.mRNA1	523
Mlu_00979.mRNA1	16
Mlu_00980.mRNA1	3
Mlu_00981.mRNA1	2
Mlu_00982.mRNA1	0
Mlu_00983.mRNA1	11
Mlu_00984.mRNA1	10
Mlu_00985.mRNA1	15
Mlu_00986.mRNA1	236
Mlu_00987.mRNA1	48
Mlu_00988.mRNA1	0
Mlu_00989.mRNA1	10
Mlu_00990.mRNA1	6
Mlu_00991.mRNA1	17
Mlu_00992.mRNA1	9
Mlu_00993.mRNA1	2
Mlu_00994.mRNA1	89
Mlu_00995.mRNA1	1820
Mlu_00996.mRNA1	137
Mlu_00997.mRNA1	0
Mlu_00998.mRNA1	96
Mlu_00999.mRNA1	227
Mlu_01000.mRNA1	0
Mlu_01001.mRNA1	0
Mlu_01002.mRNA1	235
Mlu_01003.mRNA1	293
Mlu_01004.mRNA1	2
Mlu_01005.mRNA1	13
Mlu_01006.mRNA1	9787
Mlu_01007.mRNA1	9248
Mlu_01008.mRNA1	331
Mlu_01009.mRNA1	125
Mlu_01010.mRNA1	299
Mlu_01011.mRNA1	0
Mlu_01012.mRNA1	266
Mlu_01013.mRNA1	228
Mlu_01014.mRNA1	194
Mlu_01015.mRNA1	0
Mlu_01016.mRNA1	3077
Mlu_01017.mRNA1	7
Mlu_01018.mRNA1	390
Mlu_01019.mRNA1	1514
Mlu_01020.mRNA1	142
Mlu_01021.mRNA1	178
Mlu_01022.mRNA1	408
Mlu_01023.mRNA1	450
Mlu_01024.mRNA1	9
Mlu_01025.mRNA1	107
Mlu_01026.mRNA1	88
Mlu_01027.mRNA1	168
Mlu_01028.mRNA1	572
Mlu_01029.mRNA1	140
Mlu_01030.mRNA1	491
Mlu_01031.mRNA1	46
Mlu_01032.mRNA1	831
Mlu_01033.mRNA1	387
Mlu_01034.mRNA1	97
Mlu_01035.mRNA1	105
Mlu_01036.mRNA1	2225
Mlu_01037.mRNA1	0
Mlu_01038.mRNA1	189
Mlu_01039.mRNA1	2
Mlu_01040.mRNA1	0
Mlu_01041.mRNA1	2
Mlu_01042.mRNA1	0
Mlu_01043.mRNA1	50
Mlu_01044.mRNA1	59
Mlu_01045.mRNA1	45
Mlu_01046.mRNA1	1
Mlu_01047.mRNA1	43
Mlu_01048.mRNA1	0
Mlu_01049.mRNA1	1197
Mlu_01050.mRNA1	511
Mlu_01051.mRNA1	0
Mlu_01052.mRNA1	0
Mlu_01053.mRNA1	248
Mlu_01054.mRNA1	63
Mlu_01055.mRNA1	697
Mlu_01056.mRNA1	2022
Mlu_01057.mRNA1	1086
Mlu_01058.mRNA1	927
Mlu_01059.mRNA1	29
Mlu_01060.mRNA1	115
Mlu_01061.mRNA1	0
Mlu_01062.mRNA1	39
Mlu_01063.mRNA1	0
Mlu_01064.mRNA1	236
Mlu_01065.mRNA1	0
Mlu_01066.mRNA1	0
Mlu_01067.mRNA1	19
Mlu_01068.mRNA1	88
Mlu_01069.mRNA1	28
Mlu_01070.mRNA1	53
Mlu_01071.mRNA1	95
Mlu_01072.mRNA1	244
Mlu_01073.mRNA1	0
Mlu_01074.mRNA1	0
Mlu_01075.mRNA1	265
Mlu_01076.mRNA1	82
Mlu_01077.mRNA1	28
Mlu_01078.mRNA1	10
Mlu_01079.mRNA1	16
Mlu_01080.mRNA1	0
Mlu_01081.mRNA1	0
Mlu_01082.mRNA1	0
Mlu_01083.mRNA1	0
Mlu_01084.mRNA1	0
Mlu_01085.mRNA1	0
Mlu_01086.mRNA1	20
Mlu_01087.mRNA1	0
Mlu_01088.mRNA1	1999
Mlu_01089.mRNA1	2220
Mlu_01090.mRNA1	1397
Mlu_01091.mRNA1	435
Mlu_01092.mRNA1	41
Mlu_01093.mRNA1	218
Mlu_01094.mRNA1	2
Mlu_01095.mRNA1	2598
Mlu_01096.mRNA1	157
Mlu_01097.mRNA1	0
Mlu_01098.mRNA1	0
Mlu_01099.mRNA1	158
Mlu_01100.mRNA1	0
Mlu_01101.mRNA1	375
Mlu_01102.mRNA1	91
Mlu_01103.mRNA1	29
Mlu_01104.mRNA1	1
Mlu_01105.mRNA1	0
Mlu_01106.mRNA1	180
Mlu_01107.mRNA1	0
Mlu_01108.mRNA1	0
Mlu_01109.mRNA1	0
Mlu_01110.mRNA1	146
Mlu_01111.mRNA1	8
Mlu_01112.mRNA1	29
Mlu_01113.mRNA1	1039
Mlu_01114.mRNA1	52
Mlu_01115.mRNA1	256
Mlu_01116.mRNA1	560
Mlu_01117.mRNA1	0
Mlu_01118.mRNA1	0
Mlu_01119.mRNA1	0
Mlu_01120.mRNA1	19
Mlu_01121.mRNA1	63
Mlu_01122.mRNA1	1
Mlu_01123.mRNA1	8
Mlu_01124.mRNA1	105
Mlu_01125.mRNA1	52
Mlu_01126.mRNA1	433
Mlu_01127.mRNA1	0
Mlu_01128.mRNA1	0
Mlu_01129.mRNA1	4
Mlu_01130.mRNA1	0
Mlu_01131.mRNA1	80
Mlu_01132.mRNA1	0
Mlu_01133.mRNA1	16
Mlu_01134.mRNA1	150
Mlu_01135.mRNA1	0
Mlu_01136.mRNA1	36
Mlu_01137.mRNA1	0
Mlu_01138.mRNA1	188
Mlu_01139.mRNA1	48
Mlu_01140.mRNA1	0
Mlu_01141.mRNA1	4
Mlu_01142.mRNA1	1152
Mlu_01143.mRNA1	162
Mlu_01144.mRNA1	11
Mlu_01145.mRNA1	85
Mlu_01146.mRNA1	1
Mlu_01147.mRNA1	22
Mlu_01148.mRNA1	281
Mlu_01149.mRNA1	280
Mlu_01150.mRNA1	0
Mlu_01151.mRNA1	0
Mlu_01152.mRNA1	9
Mlu_01153.mRNA1	47
Mlu_01154.mRNA1	0
Mlu_01155.mRNA1	390
Mlu_01156.mRNA1	43
Mlu_01157.mRNA1	152
Mlu_01158.mRNA1	30
Mlu_01159.mRNA1	50
Mlu_01160.mRNA1	150
Mlu_01161.mRNA1	0
Mlu_01162.mRNA1	0
Mlu_01163.mRNA1	0
Mlu_01164.mRNA1	233
Mlu_01165.mRNA1	19
Mlu_01166.mRNA1	7
Mlu_01167.mRNA1	50
Mlu_01168.mRNA1	46
Mlu_01169.mRNA1	149
Mlu_01170.mRNA1	113
Mlu_01171.mRNA1	547
Mlu_01172.mRNA1	226
Mlu_01173.mRNA1	274
Mlu_01174.mRNA1	1
Mlu_01175.mRNA1	0
Mlu_01176.mRNA1	134
Mlu_01177.mRNA1	0
Mlu_01178.mRNA1	48
Mlu_01179.mRNA1	1
Mlu_01180.mRNA1	0
Mlu_01181.mRNA1	0
Mlu_01182.mRNA1	3
Mlu_01183.mRNA1	0
Mlu_01184.mRNA1	0
Mlu_01185.mRNA1	298
Mlu_01186.mRNA1	43
Mlu_01187.mRNA1	179
Mlu_01188.mRNA1	14
Mlu_01189.mRNA1	339
Mlu_01190.mRNA1	1
Mlu_01191.mRNA1	0
Mlu_01192.mRNA1	58
Mlu_01193.mRNA1	898
Mlu_01194.mRNA1	318
Mlu_01195.mRNA1	7
Mlu_01196.mRNA1	0
Mlu_01197.mRNA1	72
Mlu_01198.mRNA1	21
Mlu_01199.mRNA1	282
Mlu_01200.mRNA1	83
Mlu_01201.mRNA1	310
Mlu_01202.mRNA1	264
Mlu_01203.mRNA1	6
Mlu_01204.mRNA1	42
Mlu_01205.mRNA1	215
Mlu_01206.mRNA1	18
Mlu_01207.mRNA1	0
Mlu_01208.mRNA1	0
Mlu_01209.mRNA1	31
Mlu_01210.mRNA1	26
Mlu_01211.mRNA1	2090
Mlu_01212.mRNA1	609
Mlu_01213.mRNA1	8
Mlu_01214.mRNA1	130
Mlu_01215.mRNA1	1
Mlu_01216.mRNA1	0
Mlu_01217.mRNA1	0
Mlu_01218.mRNA1	0
Mlu_01219.mRNA1	1
Mlu_01220.mRNA1	0
Mlu_01221.mRNA1	0
Mlu_01222.mRNA1	1
Mlu_01223.mRNA1	1
Mlu_01224.mRNA1	0
Mlu_01225.mRNA1	86
Mlu_01226.mRNA1	116
Mlu_01227.mRNA1	423
Mlu_01228.mRNA1	0
Mlu_01229.mRNA1	0
Mlu_01230.mRNA1	42
Mlu_01231.mRNA1	32
Mlu_01232.mRNA1	196
Mlu_01233.mRNA1	0
Mlu_01234.mRNA1	6
Mlu_01235.mRNA1	0
Mlu_01236.mRNA1	101
Mlu_01237.mRNA1	777
Mlu_01238.mRNA1	35
Mlu_01239.mRNA1	50
Mlu_01240.mRNA1	295
Mlu_01241.mRNA1	233
Mlu_01242.mRNA1	89
Mlu_01243.mRNA1	279
Mlu_01244.mRNA1	254
Mlu_01245.mRNA1	386
Mlu_01246.mRNA1	15
Mlu_01247.mRNA1	638
Mlu_01248.mRNA1	7
Mlu_01249.mRNA1	123
Mlu_01250.mRNA1	135
Mlu_01251.mRNA1	16
Mlu_01252.mRNA1	4
Mlu_01253.mRNA1	161
Mlu_01254.mRNA1	77
Mlu_01255.mRNA1	1
Mlu_01256.mRNA1	18
Mlu_01257.mRNA1	82
Mlu_01258.mRNA1	586
Mlu_01259.mRNA1	225
Mlu_01260.mRNA1	87
Mlu_01261.mRNA1	45
Mlu_01262.mRNA1	123
Mlu_01263.mRNA1	146
Mlu_01264.mRNA1	148
Mlu_01265.mRNA1	19
Mlu_01266.mRNA1	56
Mlu_01267.mRNA1	7
Mlu_01268.mRNA1	215
Mlu_01269.mRNA1	276
Mlu_01270.mRNA1	0
Mlu_01271.mRNA1	5
Mlu_01272.mRNA1	133
Mlu_01273.mRNA1	146
Mlu_01274.mRNA1	2
Mlu_01275.mRNA1	68
Mlu_01276.mRNA1	9
Mlu_01277.mRNA1	128
Mlu_01278.mRNA1	0
Mlu_01279.mRNA1	0
Mlu_01280.mRNA1	0
Mlu_01281.mRNA1	0
Mlu_01282.mRNA1	131
Mlu_01283.mRNA1	319
Mlu_01284.mRNA1	7
Mlu_01285.mRNA1	0
Mlu_01286.mRNA1	10
Mlu_01287.mRNA1	139
Mlu_01288.mRNA1	0
Mlu_01289.mRNA1	152
Mlu_01290.mRNA1	393
Mlu_01291.mRNA1	87
Mlu_01292.mRNA1	0
Mlu_01293.mRNA1	0
Mlu_01294.mRNA1	0
Mlu_01295.mRNA1	0
Mlu_01296.mRNA1	0
Mlu_01297.mRNA1	0
Mlu_01298.mRNA1	287
Mlu_01299.mRNA1	59
Mlu_01300.mRNA1	0
Mlu_01301.mRNA1	0
Mlu_01302.mRNA1	90
Mlu_01303.mRNA1	170
Mlu_01304.mRNA1	0
Mlu_01305.mRNA1	326
Mlu_01306.mRNA1	832
Mlu_01307.mRNA1	0
Mlu_01308.mRNA1	144
Mlu_01309.mRNA1	254
Mlu_01310.mRNA1	7
Mlu_01311.mRNA1	128
Mlu_01312.mRNA1	610
Mlu_01313.mRNA1	1342
Mlu_01314.mRNA1	8
Mlu_01315.mRNA1	37
Mlu_01316.mRNA1	413
Mlu_01317.mRNA1	226
Mlu_01318.mRNA1	4
Mlu_01319.mRNA1	262
Mlu_01320.mRNA1	0
Mlu_01321.mRNA1	98
Mlu_01322.mRNA1	32
Mlu_01323.mRNA1	0
Mlu_01324.mRNA1	4
Mlu_01325.mRNA1	3
Mlu_01326.mRNA1	12
Mlu_01327.mRNA1	5
Mlu_01328.mRNA1	479
Mlu_01329.mRNA1	13
Mlu_01330.mRNA1	0
Mlu_01331.mRNA1	456
Mlu_01332.mRNA1	880
Mlu_01333.mRNA1	0
Mlu_01334.mRNA1	112
Mlu_01335.mRNA1	30
Mlu_01336.mRNA1	1
Mlu_01337.mRNA1	0
Mlu_01338.mRNA1	579
Mlu_01339.mRNA1	225
Mlu_01340.mRNA1	2
Mlu_01341.mRNA1	24
Mlu_01342.mRNA1	2424
Mlu_01343.mRNA1	0
Mlu_01344.mRNA1	11
Mlu_01345.mRNA1	953
Mlu_01346.mRNA1	18
Mlu_01347.mRNA1	0
Mlu_01348.mRNA1	288
Mlu_01349.mRNA1	1
Mlu_01350.mRNA1	676
Mlu_01351.mRNA1	9
Mlu_01352.mRNA1	0
Mlu_01353.mRNA1	6644
Mlu_01354.mRNA1	0
Mlu_01355.mRNA1	41
Mlu_01356.mRNA1	15
Mlu_01357.mRNA1	286
Mlu_01358.mRNA1	0
Mlu_01359.mRNA1	0
Mlu_01360.mRNA1	0
Mlu_01361.mRNA1	335
Mlu_01362.mRNA1	0
Mlu_01363.mRNA1	0
Mlu_01364.mRNA1	10
Mlu_01365.mRNA1	116
Mlu_01366.mRNA1	160
Mlu_01367.mRNA1	225
Mlu_01368.mRNA1	1100
Mlu_01369.mRNA1	138
Mlu_01370.mRNA1	69
Mlu_01371.mRNA1	153
Mlu_01372.mRNA1	262
Mlu_01373.mRNA1	169
Mlu_01374.mRNA1	763
Mlu_01375.mRNA1	181
Mlu_01376.mRNA1	80
Mlu_01377.mRNA1	195
Mlu_01378.mRNA1	491
Mlu_01379.mRNA1	153
Mlu_01380.mRNA1	68
Mlu_01381.mRNA1	27
Mlu_01382.mRNA1	2
Mlu_01383.mRNA1	101
Mlu_01384.mRNA1	442
Mlu_01385.mRNA1	8796
Mlu_01386.mRNA1	0
Mlu_01387.mRNA1	15
Mlu_01388.mRNA1	0
Mlu_01389.mRNA1	0
Mlu_01390.mRNA1	0
Mlu_01391.mRNA1	673
Mlu_01392.mRNA1	368
Mlu_01393.mRNA1	53
Mlu_01394.mRNA1	0
Mlu_01395.mRNA1	210
Mlu_01396.mRNA1	501
Mlu_01397.mRNA1	297
Mlu_01398.mRNA1	6
Mlu_01399.mRNA1	374
Mlu_01400.mRNA1	203
Mlu_01401.mRNA1	72
Mlu_01402.mRNA1	0
Mlu_01403.mRNA1	17
Mlu_01404.mRNA1	1
Mlu_01405.mRNA1	0
Mlu_01406.mRNA1	209
Mlu_01407.mRNA1	12
Mlu_01408.mRNA1	1776
Mlu_01409.mRNA1	10
Mlu_01410.mRNA1	266
Mlu_01411.mRNA1	129
Mlu_01412.mRNA1	366
Mlu_01413.mRNA1	1
Mlu_01414.mRNA1	484
Mlu_01415.mRNA1	5
Mlu_01416.mRNA1	1035
Mlu_01417.mRNA1	4
Mlu_01418.mRNA1	40
Mlu_01419.mRNA1	73
Mlu_01420.mRNA1	129
Mlu_01421.mRNA1	5
Mlu_01422.mRNA1	0
Mlu_01423.mRNA1	3
Mlu_01424.mRNA1	0
Mlu_01425.mRNA1	313
Mlu_01426.mRNA1	662
Mlu_01427.mRNA1	316
Mlu_01428.mRNA1	230
Mlu_01429.mRNA1	2
Mlu_01430.mRNA1	167
Mlu_01431.mRNA1	54
Mlu_01432.mRNA1	200
Mlu_01433.mRNA1	4714
Mlu_01434.mRNA1	82
Mlu_01435.mRNA1	1
Mlu_01436.mRNA1	13
Mlu_01437.mRNA1	30
Mlu_01438.mRNA1	402
Mlu_01439.mRNA1	98
Mlu_01440.mRNA1	9
Mlu_01441.mRNA1	203
Mlu_01442.mRNA1	282
Mlu_01443.mRNA1	95
Mlu_01444.mRNA1	0
Mlu_01445.mRNA1	0
Mlu_01446.mRNA1	102
Mlu_01447.mRNA1	73
Mlu_01448.mRNA1	2
Mlu_01449.mRNA1	232
Mlu_01450.mRNA1	6552
Mlu_01451.mRNA1	68
Mlu_01452.mRNA1	98
Mlu_01453.mRNA1	0
Mlu_01454.mRNA1	0
Mlu_01455.mRNA1	185
Mlu_01456.mRNA1	342
Mlu_01457.mRNA1	325
Mlu_01458.mRNA1	0
Mlu_01459.mRNA1	0
Mlu_01460.mRNA1	160
Mlu_01461.mRNA1	995
Mlu_01462.mRNA1	87
Mlu_01463.mRNA1	5
Mlu_01464.mRNA1	44
Mlu_01465.mRNA1	41
Mlu_01466.mRNA1	486
Mlu_01467.mRNA1	5
Mlu_01468.mRNA1	268
Mlu_01469.mRNA1	8
Mlu_01470.mRNA1	249
Mlu_01471.mRNA1	85
Mlu_01472.mRNA1	552
Mlu_01473.mRNA1	33
Mlu_01474.mRNA1	142
Mlu_01475.mRNA1	115
Mlu_01476.mRNA1	28
Mlu_01477.mRNA1	668
Mlu_01478.mRNA1	530
Mlu_01479.mRNA1	132
Mlu_01480.mRNA1	103
Mlu_01481.mRNA1	505
Mlu_01482.mRNA1	158
Mlu_01483.mRNA1	1344
Mlu_01484.mRNA1	663
Mlu_01485.mRNA1	342
Mlu_01486.mRNA1	632
Mlu_01487.mRNA1	0
Mlu_01488.mRNA1	1
Mlu_01489.mRNA1	215
Mlu_01490.mRNA1	35
Mlu_01491.mRNA1	0
Mlu_01492.mRNA1	10
Mlu_01493.mRNA1	0
Mlu_01494.mRNA1	0
Mlu_01495.mRNA1	0
Mlu_01496.mRNA1	0
Mlu_01497.mRNA1	0
Mlu_01498.mRNA1	126
Mlu_01499.mRNA1	211
Mlu_01500.mRNA1	39
Mlu_01501.mRNA1	6
Mlu_01502.mRNA1	0
Mlu_01503.mRNA1	50
Mlu_01504.mRNA1	19
Mlu_01505.mRNA1	0
Mlu_01506.mRNA1	2149
Mlu_01507.mRNA1	296
Mlu_01508.mRNA1	202
Mlu_01509.mRNA1	0
Mlu_01510.mRNA1	104
Mlu_01511.mRNA1	0
Mlu_01512.mRNA1	231
Mlu_01513.mRNA1	294
Mlu_01514.mRNA1	0
Mlu_01515.mRNA1	280
Mlu_01516.mRNA1	426
Mlu_01517.mRNA1	1886
Mlu_01518.mRNA1	0
Mlu_01519.mRNA1	0
Mlu_01520.mRNA1	15
Mlu_01521.mRNA1	5
Mlu_01522.mRNA1	40
Mlu_01523.mRNA1	477
Mlu_01524.mRNA1	442
Mlu_01525.mRNA1	0
Mlu_01526.mRNA1	62
Mlu_01527.mRNA1	116
Mlu_01528.mRNA1	18
Mlu_01529.mRNA1	91
Mlu_01530.mRNA1	2
Mlu_01531.mRNA1	987
Mlu_01532.mRNA1	8
Mlu_01533.mRNA1	32
Mlu_01534.mRNA1	188
Mlu_01535.mRNA1	408
Mlu_01536.mRNA1	38
Mlu_01537.mRNA1	1740
Mlu_01538.mRNA1	160
Mlu_01539.mRNA1	12
Mlu_01540.mRNA1	0
Mlu_01541.mRNA1	0
Mlu_01542.mRNA1	0
Mlu_01543.mRNA1	0
Mlu_01544.mRNA1	55
Mlu_01545.mRNA1	193
Mlu_01546.mRNA1	276
Mlu_01547.mRNA1	482
Mlu_01548.mRNA1	0
Mlu_01549.mRNA1	30
Mlu_01550.mRNA1	1260
Mlu_01551.mRNA1	181
Mlu_01552.mRNA1	406
Mlu_01553.mRNA1	0
Mlu_01554.mRNA1	0
Mlu_01555.mRNA1	0
Mlu_01556.mRNA1	0
Mlu_01557.mRNA1	376
Mlu_01558.mRNA1	5
Mlu_01559.mRNA1	849
Mlu_01560.mRNA1	4
Mlu_01561.mRNA1	10
Mlu_01562.mRNA1	1575
Mlu_01563.mRNA1	0
Mlu_01564.mRNA1	25
Mlu_01565.mRNA1	2
Mlu_01566.mRNA1	1008
Mlu_01567.mRNA1	143
Mlu_01568.mRNA1	72
Mlu_01569.mRNA1	95
Mlu_01570.mRNA1	0
Mlu_01571.mRNA1	5
Mlu_01572.mRNA1	174
Mlu_01573.mRNA1	12
Mlu_01574.mRNA1	63
Mlu_01575.mRNA1	640
Mlu_01576.mRNA1	3
Mlu_01577.mRNA1	1
Mlu_01578.mRNA1	42
Mlu_01579.mRNA1	4
Mlu_01580.mRNA1	177
Mlu_01581.mRNA1	577
Mlu_01582.mRNA1	0
Mlu_01583.mRNA1	59
Mlu_01584.mRNA1	149
Mlu_01585.mRNA1	0
Mlu_01586.mRNA1	0
Mlu_01587.mRNA1	6
Mlu_01588.mRNA1	2
Mlu_01589.mRNA1	0
Mlu_01590.mRNA1	1
Mlu_01591.mRNA1	0
Mlu_01592.mRNA1	0
Mlu_01593.mRNA1	204
Mlu_01594.mRNA1	592
Mlu_01595.mRNA1	0
Mlu_01596.mRNA1	45
Mlu_01597.mRNA1	1
Mlu_01598.mRNA1	1
Mlu_01599.mRNA1	106
Mlu_01600.mRNA1	4
Mlu_01601.mRNA1	102
Mlu_01602.mRNA1	166
Mlu_01603.mRNA1	10
Mlu_01604.mRNA1	236
Mlu_01605.mRNA1	366
Mlu_01606.mRNA1	99
Mlu_01607.mRNA1	8
Mlu_01608.mRNA1	675
Mlu_01609.mRNA1	147
Mlu_01610.mRNA1	75
Mlu_01611.mRNA1	0
Mlu_01612.mRNA1	311
Mlu_01613.mRNA1	0
Mlu_01614.mRNA1	0
Mlu_01615.mRNA1	124
Mlu_01616.mRNA1	10
Mlu_01617.mRNA1	0
Mlu_01618.mRNA1	2038
Mlu_01619.mRNA1	258
Mlu_01620.mRNA1	742
Mlu_01621.mRNA1	12
Mlu_01622.mRNA1	0
Mlu_01623.mRNA1	1
Mlu_01624.mRNA1	129
Mlu_01625.mRNA1	7
Mlu_01626.mRNA1	485
Mlu_01627.mRNA1	174
Mlu_01628.mRNA1	30
Mlu_01629.mRNA1	762
Mlu_01630.mRNA1	1
Mlu_01631.mRNA1	0
Mlu_01632.mRNA1	1
Mlu_01633.mRNA1	42
Mlu_01634.mRNA1	87
Mlu_01635.mRNA1	138
Mlu_01636.mRNA1	39
Mlu_01637.mRNA1	0
Mlu_01638.mRNA1	0
Mlu_01639.mRNA1	244
Mlu_01640.mRNA1	649
Mlu_01641.mRNA1	34
Mlu_01642.mRNA1	76
Mlu_01643.mRNA1	1
Mlu_01644.mRNA1	162
Mlu_01645.mRNA1	167
Mlu_01646.mRNA1	226
Mlu_01647.mRNA1	15
Mlu_01648.mRNA1	5
Mlu_01649.mRNA1	47
Mlu_01650.mRNA1	315
Mlu_01651.mRNA1	2
Mlu_01652.mRNA1	0
Mlu_01653.mRNA1	565
Mlu_01654.mRNA1	68
Mlu_01655.mRNA1	39
Mlu_01656.mRNA1	318
Mlu_01657.mRNA1	589
Mlu_01658.mRNA1	2291
Mlu_01659.mRNA1	62
Mlu_01660.mRNA1	53
Mlu_01661.mRNA1	39
Mlu_01662.mRNA1	7
Mlu_01663.mRNA1	822
Mlu_01664.mRNA1	140
Mlu_01665.mRNA1	111
Mlu_01666.mRNA1	0
Mlu_01667.mRNA1	0
Mlu_01668.mRNA1	121
Mlu_01669.mRNA1	0
Mlu_01670.mRNA1	9
Mlu_01671.mRNA1	242
Mlu_01672.mRNA1	216
Mlu_01673.mRNA1	1978
Mlu_01674.mRNA1	109
Mlu_01675.mRNA1	282
Mlu_01676.mRNA1	0
Mlu_01677.mRNA1	887
Mlu_01678.mRNA1	2240
Mlu_01679.mRNA1	344
Mlu_01680.mRNA1	0
Mlu_01681.mRNA1	1260
Mlu_01682.mRNA1	254
Mlu_01683.mRNA1	15
Mlu_01684.mRNA1	1
Mlu_01685.mRNA1	42
Mlu_01686.mRNA1	143
Mlu_01687.mRNA1	219
Mlu_01688.mRNA1	5
Mlu_01689.mRNA1	313
Mlu_01690.mRNA1	88
Mlu_01691.mRNA1	234
Mlu_01692.mRNA1	102
Mlu_01693.mRNA1	1270
Mlu_01694.mRNA1	72
Mlu_01695.mRNA1	1139
Mlu_01696.mRNA1	924
Mlu_01697.mRNA1	31
Mlu_01698.mRNA1	242
Mlu_01699.mRNA1	202
Mlu_01700.mRNA1	32
Mlu_01701.mRNA1	0
Mlu_01702.mRNA1	236
Mlu_01703.mRNA1	71
Mlu_01704.mRNA1	0
Mlu_01705.mRNA1	0
Mlu_01706.mRNA1	84
Mlu_01707.mRNA1	0
Mlu_01708.mRNA1	1
Mlu_01709.mRNA1	17
Mlu_01710.mRNA1	728
Mlu_01711.mRNA1	0
Mlu_01712.mRNA1	65
Mlu_01713.mRNA1	1999
Mlu_01714.mRNA1	362
Mlu_01715.mRNA1	3
Mlu_01716.mRNA1	464
Mlu_01717.mRNA1	17
Mlu_01718.mRNA1	69
Mlu_01719.mRNA1	0
Mlu_01720.mRNA1	5
Mlu_01721.mRNA1	89
Mlu_01722.mRNA1	34
Mlu_01723.mRNA1	4
Mlu_01724.mRNA1	14
Mlu_01725.mRNA1	2
Mlu_01726.mRNA1	123
Mlu_01727.mRNA1	71
Mlu_01728.mRNA1	71
Mlu_01729.mRNA1	33
Mlu_01730.mRNA1	50
Mlu_01731.mRNA1	0
Mlu_01732.mRNA1	0
Mlu_01733.mRNA1	711
Mlu_01734.mRNA1	1381
Mlu_01735.mRNA1	0
Mlu_01736.mRNA1	21
Mlu_01737.mRNA1	0
Mlu_01738.mRNA1	167
Mlu_01739.mRNA1	0
Mlu_01740.mRNA1	1
Mlu_01741.mRNA1	0
Mlu_01742.mRNA1	0
Mlu_01743.mRNA1	25
Mlu_01744.mRNA1	211
Mlu_01745.mRNA1	184
Mlu_01746.mRNA1	35
Mlu_01747.mRNA1	406
Mlu_01748.mRNA1	1422
Mlu_01749.mRNA1	19
Mlu_01750.mRNA1	35
Mlu_01751.mRNA1	99
Mlu_01752.mRNA1	41
Mlu_01753.mRNA1	0
Mlu_01754.mRNA1	174
Mlu_01755.mRNA1	3
Mlu_01756.mRNA1	0
Mlu_01757.mRNA1	603
Mlu_01758.mRNA1	24
Mlu_01759.mRNA1	287
Mlu_01760.mRNA1	0
Mlu_01761.mRNA1	1
Mlu_01762.mRNA1	3
Mlu_01763.mRNA1	897
Mlu_01764.mRNA1	179
Mlu_01765.mRNA1	0
Mlu_01766.mRNA1	0
Mlu_01767.mRNA1	331
Mlu_01768.mRNA1	114
Mlu_01769.mRNA1	0
Mlu_01770.mRNA1	47
Mlu_01771.mRNA1	50
Mlu_01772.mRNA1	885
Mlu_01773.mRNA1	0
Mlu_01774.mRNA1	0
Mlu_01775.mRNA1	1
Mlu_01776.mRNA1	44
Mlu_01777.mRNA1	0
Mlu_01778.mRNA1	0
Mlu_01779.mRNA1	0
Mlu_01780.mRNA1	0
Mlu_01781.mRNA1	1
Mlu_01782.mRNA1	0
Mlu_01783.mRNA1	0
Mlu_01784.mRNA1	0
Mlu_01785.mRNA1	17
Mlu_01786.mRNA1	0
Mlu_01787.mRNA1	28
Mlu_01788.mRNA1	1140
Mlu_01789.mRNA1	975
Mlu_01790.mRNA1	1
Mlu_01791.mRNA1	0
Mlu_01792.mRNA1	154
Mlu_01793.mRNA1	543
Mlu_01794.mRNA1	0
Mlu_01795.mRNA1	0
Mlu_01796.mRNA1	5
Mlu_01797.mRNA1	68
Mlu_01798.mRNA1	7
Mlu_01799.mRNA1	152
Mlu_01800.mRNA1	4
Mlu_01801.mRNA1	159
Mlu_01802.mRNA1	330
Mlu_01803.mRNA1	206
Mlu_01804.mRNA1	0
Mlu_01805.mRNA1	138
Mlu_01806.mRNA1	276
Mlu_01807.mRNA1	39
Mlu_01808.mRNA1	0
Mlu_01809.mRNA1	0
Mlu_01810.mRNA1	311
Mlu_01811.mRNA1	267
Mlu_01812.mRNA1	0
Mlu_01813.mRNA1	42
Mlu_01814.mRNA1	0
Mlu_01815.mRNA1	17
Mlu_01816.mRNA1	180
Mlu_01817.mRNA1	0
Mlu_01818.mRNA1	224
Mlu_01819.mRNA1	429
Mlu_01820.mRNA1	72
Mlu_01821.mRNA1	6
Mlu_01822.mRNA1	113
Mlu_01823.mRNA1	78
Mlu_01824.mRNA1	0
Mlu_01825.mRNA1	0
Mlu_01826.mRNA1	194
Mlu_01827.mRNA1	174
Mlu_01828.mRNA1	341
Mlu_01829.mRNA1	0
Mlu_01830.mRNA1	0
Mlu_01831.mRNA1	16
Mlu_01832.mRNA1	1
Mlu_01833.mRNA1	42
Mlu_01834.mRNA1	120
Mlu_01835.mRNA1	23
Mlu_01836.mRNA1	6
Mlu_01837.mRNA1	40
Mlu_01838.mRNA1	211
Mlu_01839.mRNA1	22
Mlu_01840.mRNA1	145
Mlu_01841.mRNA1	819
Mlu_01842.mRNA1	117
Mlu_01843.mRNA1	7
Mlu_01844.mRNA1	0
Mlu_01845.mRNA1	23
Mlu_01846.mRNA1	1391
Mlu_01847.mRNA1	50
Mlu_01848.mRNA1	3
Mlu_01849.mRNA1	22
Mlu_01850.mRNA1	1678
Mlu_01851.mRNA1	69
Mlu_01852.mRNA1	16
Mlu_01853.mRNA1	384
Mlu_01854.mRNA1	376
Mlu_01855.mRNA1	649
Mlu_01856.mRNA1	6
Mlu_01857.mRNA1	2
Mlu_01858.mRNA1	295
Mlu_01859.mRNA1	1
Mlu_01860.mRNA1	0
Mlu_01861.mRNA1	321
Mlu_01862.mRNA1	92
Mlu_01863.mRNA1	398
Mlu_01864.mRNA1	59
Mlu_01865.mRNA1	9
Mlu_01866.mRNA1	285
Mlu_01867.mRNA1	0
Mlu_01868.mRNA1	0
Mlu_01869.mRNA1	106
Mlu_01870.mRNA1	251
Mlu_01871.mRNA1	109
Mlu_01872.mRNA1	0
Mlu_01873.mRNA1	0
Mlu_01874.mRNA1	0
Mlu_01875.mRNA1	37
Mlu_01876.mRNA1	1
Mlu_01877.mRNA1	0
Mlu_01878.mRNA1	1756
Mlu_01879.mRNA1	46
Mlu_01880.mRNA1	1334
Mlu_01881.mRNA1	285
Mlu_01882.mRNA1	0
Mlu_01883.mRNA1	1
Mlu_01884.mRNA1	46
Mlu_01885.mRNA1	1
Mlu_01886.mRNA1	0
Mlu_01887.mRNA1	24
Mlu_01888.mRNA1	31
Mlu_01889.mRNA1	273
Mlu_01890.mRNA1	0
Mlu_01891.mRNA1	209
Mlu_01892.mRNA1	0
Mlu_01893.mRNA1	0
Mlu_01894.mRNA1	7
Mlu_01895.mRNA1	0
Mlu_01896.mRNA1	80
Mlu_01897.mRNA1	4
Mlu_01898.mRNA1	0
Mlu_01899.mRNA1	327
Mlu_01900.mRNA1	376
Mlu_01901.mRNA1	154
Mlu_01902.mRNA1	59
Mlu_01903.mRNA1	167
Mlu_01904.mRNA1	0
Mlu_01905.mRNA1	1807
Mlu_01906.mRNA1	0
Mlu_01907.mRNA1	144
Mlu_01908.mRNA1	181
Mlu_01909.mRNA1	19
Mlu_01910.mRNA1	0
Mlu_01911.mRNA1	0
Mlu_01912.mRNA1	467
Mlu_01913.mRNA1	3926
Mlu_01914.mRNA1	111
Mlu_01915.mRNA1	245
Mlu_01916.mRNA1	1822
Mlu_01917.mRNA1	194
Mlu_01918.mRNA1	25
Mlu_01919.mRNA1	3
Mlu_01920.mRNA1	215
Mlu_01921.mRNA1	1
Mlu_01922.mRNA1	134
Mlu_01923.mRNA1	1102
Mlu_01924.mRNA1	795
Mlu_01925.mRNA1	0
Mlu_01926.mRNA1	217
Mlu_01927.mRNA1	2773
Mlu_01928.mRNA1	98
Mlu_01929.mRNA1	5
Mlu_01930.mRNA1	311
Mlu_01931.mRNA1	248
Mlu_01932.mRNA1	42
Mlu_01933.mRNA1	1
Mlu_01934.mRNA1	0
Mlu_01935.mRNA1	0
Mlu_01936.mRNA1	316
Mlu_01937.mRNA1	0
Mlu_01938.mRNA1	287
Mlu_01939.mRNA1	55
Mlu_01940.mRNA1	414
Mlu_01941.mRNA1	310
Mlu_01942.mRNA1	718
Mlu_01943.mRNA1	2
Mlu_01944.mRNA1	84
Mlu_01945.mRNA1	335
Mlu_01946.mRNA1	2
Mlu_01947.mRNA1	0
Mlu_01948.mRNA1	13
Mlu_01949.mRNA1	2
Mlu_01950.mRNA1	72
Mlu_01951.mRNA1	1
Mlu_01952.mRNA1	0
Mlu_01953.mRNA1	7
Mlu_01954.mRNA1	1
Mlu_01955.mRNA1	0
Mlu_01956.mRNA1	363
Mlu_01957.mRNA1	56
Mlu_01958.mRNA1	236
Mlu_01959.mRNA1	0
Mlu_01960.mRNA1	79
Mlu_01961.mRNA1	21
Mlu_01962.mRNA1	0
Mlu_01963.mRNA1	56
Mlu_01964.mRNA1	0
Mlu_01965.mRNA1	0
Mlu_01966.mRNA1	3
Mlu_01967.mRNA1	124
Mlu_01968.mRNA1	0
Mlu_01969.mRNA1	46
Mlu_01970.mRNA1	293
Mlu_01971.mRNA1	9
Mlu_01972.mRNA1	3
Mlu_01973.mRNA1	0
Mlu_01974.mRNA1	115
Mlu_01975.mRNA1	11
Mlu_01976.mRNA1	1913
Mlu_01977.mRNA1	850
Mlu_01978.mRNA1	59
Mlu_01979.mRNA1	35
Mlu_01980.mRNA1	3
Mlu_01981.mRNA1	0
Mlu_01982.mRNA1	163
Mlu_01983.mRNA1	8
Mlu_01984.mRNA1	80
Mlu_01985.mRNA1	1
Mlu_01986.mRNA1	1
Mlu_01987.mRNA1	112
Mlu_01988.mRNA1	0
Mlu_01989.mRNA1	0
Mlu_01990.mRNA1	256
Mlu_01991.mRNA1	0
Mlu_01992.mRNA1	44
Mlu_01993.mRNA1	0
Mlu_01994.mRNA1	232
Mlu_01995.mRNA1	190
Mlu_01996.mRNA1	2
Mlu_01997.mRNA1	42
Mlu_01998.mRNA1	37
Mlu_01999.mRNA1	1
Mlu_02000.mRNA1	14
[truncated: 44,860 more rows]

## Sheet: S3
Mlu_00001.mRNA1	456
Mlu_00002.mRNA1	109
Mlu_00003.mRNA1	0
Mlu_00004.mRNA1	173
Mlu_00005.mRNA1	278
Mlu_00006.mRNA1	202
Mlu_00007.mRNA1	61
Mlu_00008.mRNA1	492
Mlu_00009.mRNA1	539
Mlu_00010.mRNA1	24
Mlu_00011.mRNA1	0
Mlu_00012.mRNA1	204
Mlu_00013.mRNA1	17
Mlu_00014.mRNA1	142
Mlu_00015.mRNA1	3
Mlu_00016.mRNA1	51
Mlu_00017.mRNA1	3
Mlu_00018.mRNA1	25
Mlu_00019.mRNA1	12
Mlu_00020.mRNA1	90
Mlu_00021.mRNA1	21
Mlu_00022.mRNA1	87
Mlu_00023.mRNA1	302
Mlu_00024.mRNA1	0
Mlu_00025.mRNA1	89
Mlu_00026.mRNA1	35
Mlu_00027.mRNA1	375
Mlu_00028.mRNA1	3
Mlu_00029.mRNA1	278
Mlu_00030.mRNA1	446
Mlu_00031.mRNA1	43
Mlu_00032.mRNA1	0
Mlu_00033.mRNA1	138
Mlu_00034.mRNA1	213
Mlu_00035.mRNA1	208
Mlu_00036.mRNA1	570
Mlu_00037.mRNA1	11
Mlu_00038.mRNA1	975
Mlu_00039.mRNA1	64
Mlu_00040.mRNA1	1
Mlu_00041.mRNA1	11
Mlu_00042.mRNA1	0
Mlu_00043.mRNA1	0
Mlu_00044.mRNA1	238
Mlu_00045.mRNA1	363
Mlu_00046.mRNA1	26
Mlu_00047.mRNA1	0
Mlu_00048.mRNA1	94
Mlu_00049.mRNA1	0
Mlu_00050.mRNA1	4372
Mlu_00051.mRNA1	0
Mlu_00052.mRNA1	0
Mlu_00053.mRNA1	0
Mlu_00054.mRNA1	0
Mlu_00055.mRNA1	0
Mlu_00056.mRNA1	0
Mlu_00057.mRNA1	5
Mlu_00058.mRNA1	13
Mlu_00059.mRNA1	182
Mlu_00060.mRNA1	2
Mlu_00061.mRNA1	1196
Mlu_00062.mRNA1	0
Mlu_00063.mRNA1	196
Mlu_00064.mRNA1	330
Mlu_00065.mRNA1	957
Mlu_00066.mRNA1	13
Mlu_00067.mRNA1	3409
Mlu_00068.mRNA1	79
Mlu_00069.mRNA1	0
Mlu_00070.mRNA1	17
Mlu_00071.mRNA1	4
Mlu_00072.mRNA1	190
Mlu_00073.mRNA1	147
Mlu_00074.mRNA1	1
Mlu_00075.mRNA1	1
Mlu_00076.mRNA1	0
Mlu_00077.mRNA1	7
Mlu_00078.mRNA1	0
Mlu_00079.mRNA1	431
Mlu_00080.mRNA1	0
Mlu_00081.mRNA1	194
Mlu_00082.mRNA1	0
Mlu_00083.mRNA1	19
Mlu_00084.mRNA1	172
Mlu_00085.mRNA1	3
Mlu_00086.mRNA1	451
Mlu_00087.mRNA1	269
Mlu_00088.mRNA1	1016
Mlu_00089.mRNA1	1839
Mlu_00090.mRNA1	2
Mlu_00091.mRNA1	5
Mlu_00092.mRNA1	463
Mlu_00093.mRNA1	461
Mlu_00094.mRNA1	373
Mlu_00095.mRNA1	8
Mlu_00096.mRNA1	39
Mlu_00097.mRNA1	0
Mlu_00098.mRNA1	0
Mlu_00099.mRNA1	1
Mlu_00100.mRNA1	16
Mlu_00101.mRNA1	2
Mlu_00102.mRNA1	294
Mlu_00103.mRNA1	2
Mlu_00104.mRNA1	1164
Mlu_00105.mRNA1	43
Mlu_00106.mRNA1	368
Mlu_00107.mRNA1	3
Mlu_00108.mRNA1	955
Mlu_00109.mRNA1	1186
Mlu_00110.mRNA1	78
Mlu_00111.mRNA1	767
Mlu_00112.mRNA1	33
Mlu_00113.mRNA1	7
Mlu_00114.mRNA1	332
Mlu_00115.mRNA1	117
Mlu_00116.mRNA1	504
Mlu_00117.mRNA1	81
Mlu_00118.mRNA1	117
Mlu_00119.mRNA1	19
Mlu_00120.mRNA1	316
Mlu_00121.mRNA1	65
Mlu_00122.mRNA1	153
Mlu_00123.mRNA1	311
Mlu_00124.mRNA1	77
Mlu_00125.mRNA1	103
Mlu_00126.mRNA1	99
Mlu_00127.mRNA1	351
Mlu_00128.mRNA1	656
Mlu_00129.mRNA1	1655
Mlu_00130.mRNA1	43
Mlu_00131.mRNA1	193
Mlu_00132.mRNA1	560
Mlu_00133.mRNA1	10
Mlu_00134.mRNA1	61
Mlu_00135.mRNA1	4
Mlu_00136.mRNA1	4
Mlu_00137.mRNA1	0
Mlu_00138.mRNA1	25
Mlu_00139.mRNA1	0
Mlu_00140.mRNA1	185
Mlu_00141.mRNA1	44
Mlu_00142.mRNA1	139
Mlu_00143.mRNA1	172
Mlu_00144.mRNA1	252
Mlu_00145.mRNA1	0
Mlu_00146.mRNA1	0
Mlu_00147.mRNA1	43
Mlu_00148.mRNA1	0
Mlu_00149.mRNA1	20
Mlu_00150.mRNA1	266
Mlu_00151.mRNA1	23
Mlu_00152.mRNA1	200
Mlu_00153.mRNA1	0
Mlu_00154.mRNA1	351
Mlu_00155.mRNA1	132
Mlu_00156.mRNA1	4434
Mlu_00157.mRNA1	24
Mlu_00158.mRNA1	0
Mlu_00159.mRNA1	0
Mlu_00160.mRNA1	516
Mlu_00161.mRNA1	6
Mlu_00162.mRNA1	0
Mlu_00163.mRNA1	285
Mlu_00164.mRNA1	823
Mlu_00165.mRNA1	35
Mlu_00166.mRNA1	154
Mlu_00167.mRNA1	0
Mlu_00168.mRNA1	7
Mlu_00169.mRNA1	136
Mlu_00170.mRNA1	198
Mlu_00171.mRNA1	462
Mlu_00172.mRNA1	56
Mlu_00173.mRNA1	33
Mlu_00174.mRNA1	72
Mlu_00175.mRNA1	303
Mlu_00176.mRNA1	118
Mlu_00177.mRNA1	686
Mlu_00178.mRNA1	2
Mlu_00179.mRNA1	390
Mlu_00180.mRNA1	31
Mlu_00181.mRNA1	4
Mlu_00182.mRNA1	2
Mlu_00183.mRNA1	0
Mlu_00184.mRNA1	0
Mlu_00185.mRNA1	0
Mlu_00186.mRNA1	357
Mlu_00187.mRNA1	845
Mlu_00188.mRNA1	2004
Mlu_00189.mRNA1	459
Mlu_00190.mRNA1	250
Mlu_00191.mRNA1	19
Mlu_00192.mRNA1	19
Mlu_00193.mRNA1	7
Mlu_00194.mRNA1	1
Mlu_00195.mRNA1	648
Mlu_00196.mRNA1	349
Mlu_00197.mRNA1	19
Mlu_00198.mRNA1	0
Mlu_00199.mRNA1	0
Mlu_00200.mRNA1	108
Mlu_00201.mRNA1	337
Mlu_00202.mRNA1	84
Mlu_00203.mRNA1	35
Mlu_00204.mRNA1	0
Mlu_00205.mRNA1	11
Mlu_00206.mRNA1	90
Mlu_00207.mRNA1	0
Mlu_00208.mRNA1	341
Mlu_00209.mRNA1	111
Mlu_00210.mRNA1	13
Mlu_00211.mRNA1	3
Mlu_00212.mRNA1	28
Mlu_00213.mRNA1	207
Mlu_00214.mRNA1	2
Mlu_00215.mRNA1	499
Mlu_00216.mRNA1	205
Mlu_00217.mRNA1	197
Mlu_00218.mRNA1	270
Mlu_00219.mRNA1	147
Mlu_00220.mRNA1	94
Mlu_00221.mRNA1	4
Mlu_00222.mRNA1	243
Mlu_00223.mRNA1	44
Mlu_00224.mRNA1	170
Mlu_00225.mRNA1	607
Mlu_00226.mRNA1	35
Mlu_00227.mRNA1	1520
Mlu_00228.mRNA1	3
Mlu_00229.mRNA1	51
Mlu_00230.mRNA1	128
Mlu_00231.mRNA1	0
Mlu_00232.mRNA1	0
Mlu_00233.mRNA1	18
Mlu_00234.mRNA1	0
Mlu_00235.mRNA1	198
Mlu_00236.mRNA1	149
Mlu_00237.mRNA1	866
Mlu_00238.mRNA1	278
Mlu_00239.mRNA1	0
Mlu_00240.mRNA1	3
Mlu_00241.mRNA1	248
Mlu_00242.mRNA1	1
Mlu_00243.mRNA1	0
Mlu_00244.mRNA1	0
Mlu_00245.mRNA1	604
Mlu_00246.mRNA1	171
Mlu_00247.mRNA1	897
Mlu_00248.mRNA1	132
Mlu_00249.mRNA1	285
Mlu_00250.mRNA1	133
Mlu_00251.mRNA1	4530
Mlu_00252.mRNA1	1277
Mlu_00253.mRNA1	638
Mlu_00254.mRNA1	356
Mlu_00255.mRNA1	2161
Mlu_00256.mRNA1	6
Mlu_00257.mRNA1	2488
Mlu_00258.mRNA1	471
Mlu_00259.mRNA1	0
Mlu_00260.mRNA1	0
Mlu_00261.mRNA1	203
Mlu_00262.mRNA1	2212
Mlu_00263.mRNA1	768
Mlu_00264.mRNA1	9
Mlu_00265.mRNA1	0
Mlu_00266.mRNA1	136
Mlu_00267.mRNA1	107
Mlu_00268.mRNA1	3264
Mlu_00269.mRNA1	1986
Mlu_00270.mRNA1	207
Mlu_00271.mRNA1	2937
Mlu_00272.mRNA1	39
Mlu_00273.mRNA1	3040
Mlu_00274.mRNA1	0
Mlu_00275.mRNA1	13
Mlu_00276.mRNA1	229
Mlu_00277.mRNA1	1
Mlu_00278.mRNA1	30
Mlu_00279.mRNA1	0
Mlu_00280.mRNA1	2
Mlu_00281.mRNA1	7
Mlu_00282.mRNA1	100
Mlu_00283.mRNA1	0
Mlu_00284.mRNA1	612
Mlu_00285.mRNA1	241
Mlu_00286.mRNA1	254
Mlu_00287.mRNA1	196
Mlu_00288.mRNA1	438
Mlu_00289.mRNA1	6
Mlu_00290.mRNA1	0
Mlu_00291.mRNA1	220
Mlu_00292.mRNA1	0
Mlu_00293.mRNA1	359
Mlu_00294.mRNA1	2
Mlu_00295.mRNA1	46
Mlu_00296.mRNA1	818
Mlu_00297.mRNA1	0
Mlu_00298.mRNA1	295
Mlu_00299.mRNA1	2065
Mlu_00300.mRNA1	81
Mlu_00301.mRNA1	225
Mlu_00302.mRNA1	610
Mlu_00303.mRNA1	129
Mlu_00304.mRNA1	1135
Mlu_00305.mRNA1	674
Mlu_00306.mRNA1	57
Mlu_00307.mRNA1	0
Mlu_00308.mRNA1	198
Mlu_00309.mRNA1	185
Mlu_00310.mRNA1	0
Mlu_00311.mRNA1	205
Mlu_00312.mRNA1	634
Mlu_00313.mRNA1	4
Mlu_00314.mRNA1	0
Mlu_00315.mRNA1	309
Mlu_00316.mRNA1	0
Mlu_00317.mRNA1	4
Mlu_00318.mRNA1	367
Mlu_00319.mRNA1	0
Mlu_00320.mRNA1	13
Mlu_00321.mRNA1	0
Mlu_00322.mRNA1	147
Mlu_00323.mRNA1	293
Mlu_00324.mRNA1	2069
Mlu_00325.mRNA1	50
Mlu_00326.mRNA1	1099
Mlu_00327.mRNA1	366
Mlu_00328.mRNA1	2
Mlu_00329.mRNA1	247
Mlu_00330.mRNA1	0
Mlu_00331.mRNA1	119
Mlu_00332.mRNA1	0
Mlu_00333.mRNA1	0
Mlu_00334.mRNA1	105
Mlu_00335.mRNA1	0
Mlu_00336.mRNA1	83
Mlu_00337.mRNA1	100
Mlu_00338.mRNA1	0
Mlu_00339.mRNA1	13
Mlu_00340.mRNA1	533
Mlu_00341.mRNA1	2971
Mlu_00342.mRNA1	504
Mlu_00343.mRNA1	69
Mlu_00344.mRNA1	247
Mlu_00345.mRNA1	54
Mlu_00346.mRNA1	116
Mlu_00347.mRNA1	11
Mlu_00348.mRNA1	180
Mlu_00349.mRNA1	782
Mlu_00350.mRNA1	5
Mlu_00351.mRNA1	2
Mlu_00352.mRNA1	7
Mlu_00353.mRNA1	533
Mlu_00354.mRNA1	3
Mlu_00355.mRNA1	102
Mlu_00356.mRNA1	0
Mlu_00357.mRNA1	0
Mlu_00358.mRNA1	40
Mlu_00359.mRNA1	259
Mlu_00360.mRNA1	0
Mlu_00361.mRNA1	15
Mlu_00362.mRNA1	1094
Mlu_00363.mRNA1	99
Mlu_00364.mRNA1	240
Mlu_00365.mRNA1	125
Mlu_00366.mRNA1	2
Mlu_00367.mRNA1	263
Mlu_00368.mRNA1	832
Mlu_00369.mRNA1	510
Mlu_00370.mRNA1	357
Mlu_00371.mRNA1	0
Mlu_00372.mRNA1	394
Mlu_00373.mRNA1	151
Mlu_00374.mRNA1	10
Mlu_00375.mRNA1	1175
Mlu_00376.mRNA1	31
Mlu_00377.mRNA1	219
Mlu_00378.mRNA1	313
Mlu_00379.mRNA1	1148
Mlu_00380.mRNA1	217
Mlu_00381.mRNA1	740
Mlu_00382.mRNA1	26
Mlu_00383.mRNA1	118
Mlu_00384.mRNA1	0
Mlu_00385.mRNA1	6
Mlu_00386.mRNA1	13
Mlu_00387.mRNA1	499
Mlu_00388.mRNA1	0
Mlu_00389.mRNA1	98
Mlu_00390.mRNA1	7
Mlu_00391.mRNA1	278
Mlu_00392.mRNA1	68
Mlu_00393.mRNA1	156
Mlu_00394.mRNA1	688
Mlu_00395.mRNA1	285
Mlu_00396.mRNA1	114
Mlu_00397.mRNA1	263
Mlu_00398.mRNA1	95
Mlu_00399.mRNA1	368
Mlu_00400.mRNA1	104
Mlu_00401.mRNA1	179
Mlu_00402.mRNA1	13
Mlu_00403.mRNA1	227
Mlu_00404.mRNA1	10
Mlu_00405.mRNA1	1067
Mlu_00406.mRNA1	470
Mlu_00407.mRNA1	31
Mlu_00408.mRNA1	79
Mlu_00409.mRNA1	0
Mlu_00410.mRNA1	122
Mlu_00411.mRNA1	248
Mlu_00412.mRNA1	2142
Mlu_00413.mRNA1	0
Mlu_00414.mRNA1	131
Mlu_00415.mRNA1	0
Mlu_00416.mRNA1	181
Mlu_00417.mRNA1	134
Mlu_00418.mRNA1	152
Mlu_00419.mRNA1	670
Mlu_00420.mRNA1	287
Mlu_00421.mRNA1	81
Mlu_00422.mRNA1	2
Mlu_00423.mRNA1	257
Mlu_00424.mRNA1	42
Mlu_00425.mRNA1	2
Mlu_00426.mRNA1	40
Mlu_00427.mRNA1	1
Mlu_00428.mRNA1	3
Mlu_00429.mRNA1	51
Mlu_00430.mRNA1	355
Mlu_00431.mRNA1	2
Mlu_00432.mRNA1	138
Mlu_00433.mRNA1	8
Mlu_00434.mRNA1	71
Mlu_00435.mRNA1	104
Mlu_00436.mRNA1	841
Mlu_00437.mRNA1	63
Mlu_00438.mRNA1	18
Mlu_00439.mRNA1	17
Mlu_00440.mRNA1	369
Mlu_00441.mRNA1	579
Mlu_00442.mRNA1	42
Mlu_00443.mRNA1	52
Mlu_00444.mRNA1	174
Mlu_00445.mRNA1	0
Mlu_00446.mRNA1	1
Mlu_00447.mRNA1	4
Mlu_00448.mRNA1	4322
Mlu_00449.mRNA1	1
Mlu_00450.mRNA1	1
Mlu_00451.mRNA1	1214
Mlu_00452.mRNA1	28
Mlu_00453.mRNA1	1289
Mlu_00454.mRNA1	190
Mlu_00455.mRNA1	355
Mlu_00456.mRNA1	251
Mlu_00457.mRNA1	3
Mlu_00458.mRNA1	0
Mlu_00459.mRNA1	86
Mlu_00460.mRNA1	27
Mlu_00461.mRNA1	181
Mlu_00462.mRNA1	28
Mlu_00463.mRNA1	229
Mlu_00464.mRNA1	28
Mlu_00465.mRNA1	294
Mlu_00466.mRNA1	0
Mlu_00467.mRNA1	64
Mlu_00468.mRNA1	143
Mlu_00469.mRNA1	269
Mlu_00470.mRNA1	268
Mlu_00471.mRNA1	335
Mlu_00472.mRNA1	50
Mlu_00473.mRNA1	591
Mlu_00474.mRNA1	20
Mlu_00475.mRNA1	267
Mlu_00476.mRNA1	7518
Mlu_00477.mRNA1	85
Mlu_00478.mRNA1	0
Mlu_00479.mRNA1	0
Mlu_00480.mRNA1	396
Mlu_00481.mRNA1	464
Mlu_00482.mRNA1	4299
Mlu_00483.mRNA1	50
Mlu_00484.mRNA1	439
Mlu_00485.mRNA1	0
Mlu_00486.mRNA1	199
Mlu_00487.mRNA1	126
Mlu_00488.mRNA1	2757
Mlu_00489.mRNA1	1007
Mlu_00490.mRNA1	148
Mlu_00491.mRNA1	172
Mlu_00492.mRNA1	94
Mlu_00493.mRNA1	1372
Mlu_00494.mRNA1	203
Mlu_00495.mRNA1	0
Mlu_00496.mRNA1	0
Mlu_00497.mRNA1	130
Mlu_00498.mRNA1	0
Mlu_00499.mRNA1	74
Mlu_00500.mRNA1	10
Mlu_00501.mRNA1	124
Mlu_00502.mRNA1	12
Mlu_00503.mRNA1	355
Mlu_00504.mRNA1	97
Mlu_00505.mRNA1	1
Mlu_00506.mRNA1	2
Mlu_00507.mRNA1	87
Mlu_00508.mRNA1	1
Mlu_00509.mRNA1	272
Mlu_00510.mRNA1	604
Mlu_00511.mRNA1	86
Mlu_00512.mRNA1	668
Mlu_00513.mRNA1	0
Mlu_00514.mRNA1	670
Mlu_00515.mRNA1	699
Mlu_00516.mRNA1	48
Mlu_00517.mRNA1	0
Mlu_00518.mRNA1	2
Mlu_00519.mRNA1	360
Mlu_00520.mRNA1	33
Mlu_00521.mRNA1	617
Mlu_00522.mRNA1	161
Mlu_00523.mRNA1	68
Mlu_00524.mRNA1	3
Mlu_00525.mRNA1	1609
Mlu_00526.mRNA1	0
Mlu_00527.mRNA1	5
Mlu_00528.mRNA1	123
Mlu_00529.mRNA1	132
Mlu_00530.mRNA1	0
Mlu_00531.mRNA1	0
Mlu_00532.mRNA1	11
Mlu_00533.mRNA1	75
Mlu_00534.mRNA1	545
Mlu_00535.mRNA1	78
Mlu_00536.mRNA1	26
Mlu_00537.mRNA1	56
Mlu_00538.mRNA1	1619
Mlu_00539.mRNA1	168
Mlu_00540.mRNA1	1
Mlu_00541.mRNA1	32
Mlu_00542.mRNA1	4
Mlu_00543.mRNA1	206
Mlu_00544.mRNA1	747
Mlu_00545.mRNA1	5
Mlu_00546.mRNA1	0
Mlu_00547.mRNA1	16
Mlu_00548.mRNA1	0
Mlu_00549.mRNA1	0
Mlu_00550.mRNA1	62
Mlu_00551.mRNA1	327
Mlu_00552.mRNA1	2429
Mlu_00553.mRNA1	4
Mlu_00554.mRNA1	685
Mlu_00555.mRNA1	13
Mlu_00556.mRNA1	0
Mlu_00557.mRNA1	2
Mlu_00558.mRNA1	32
Mlu_00559.mRNA1	0
Mlu_00560.mRNA1	445
Mlu_00561.mRNA1	222
Mlu_00562.mRNA1	2352
Mlu_00563.mRNA1	12
Mlu_00564.mRNA1	0
Mlu_00565.mRNA1	0
Mlu_00566.mRNA1	41
Mlu_00567.mRNA1	84
Mlu_00568.mRNA1	96
Mlu_00569.mRNA1	87
Mlu_00570.mRNA1	67
Mlu_00571.mRNA1	1082
Mlu_00572.mRNA1	173
Mlu_00573.mRNA1	33
Mlu_00574.mRNA1	273
Mlu_00575.mRNA1	108
Mlu_00576.mRNA1	0
Mlu_00577.mRNA1	2
Mlu_00578.mRNA1	788
Mlu_00579.mRNA1	16
Mlu_00580.mRNA1	54
Mlu_00581.mRNA1	456
Mlu_00582.mRNA1	1
Mlu_00583.mRNA1	114
Mlu_00584.mRNA1	236
Mlu_00585.mRNA1	136
Mlu_00586.mRNA1	176
Mlu_00587.mRNA1	1080
Mlu_00588.mRNA1	0
Mlu_00589.mRNA1	14
Mlu_00590.mRNA1	53
Mlu_00591.mRNA1	1527
Mlu_00592.mRNA1	1
Mlu_00593.mRNA1	34
Mlu_00594.mRNA1	513
Mlu_00595.mRNA1	13
Mlu_00596.mRNA1	1
Mlu_00597.mRNA1	0
Mlu_00598.mRNA1	13
Mlu_00599.mRNA1	69
Mlu_00600.mRNA1	578
Mlu_00601.mRNA1	3420
Mlu_00602.mRNA1	0
Mlu_00603.mRNA1	574
Mlu_00604.mRNA1	118
Mlu_00605.mRNA1	324
Mlu_00606.mRNA1	96
Mlu_00607.mRNA1	14
Mlu_00608.mRNA1	674
Mlu_00609.mRNA1	25
Mlu_00610.mRNA1	49
Mlu_00611.mRNA1	0
Mlu_00612.mRNA1	3
Mlu_00613.mRNA1	27
Mlu_00614.mRNA1	1411
Mlu_00615.mRNA1	452
Mlu_00616.mRNA1	0
Mlu_00617.mRNA1	341
Mlu_00618.mRNA1	1
Mlu_00619.mRNA1	1
Mlu_00620.mRNA1	1060
Mlu_00621.mRNA1	576
Mlu_00622.mRNA1	1202
Mlu_00623.mRNA1	27
Mlu_00624.mRNA1	1478
Mlu_00625.mRNA1	8
Mlu_00626.mRNA1	21
Mlu_00627.mRNA1	936
Mlu_00628.mRNA1	0
Mlu_00629.mRNA1	0
Mlu_00630.mRNA1	3
Mlu_00631.mRNA1	281
Mlu_00632.mRNA1	99
Mlu_00633.mRNA1	29
Mlu_00634.mRNA1	0
Mlu_00635.mRNA1	615
Mlu_00636.mRNA1	444
Mlu_00637.mRNA1	142
Mlu_00638.mRNA1	510
Mlu_00639.mRNA1	1
Mlu_00640.mRNA1	227
Mlu_00641.mRNA1	3
Mlu_00642.mRNA1	101
Mlu_00643.mRNA1	57
Mlu_00644.mRNA1	365
Mlu_00645.mRNA1	55
Mlu_00646.mRNA1	306
Mlu_00647.mRNA1	277
Mlu_00648.mRNA1	146
Mlu_00649.mRNA1	586
Mlu_00650.mRNA1	360
Mlu_00651.mRNA1	261
Mlu_00652.mRNA1	650
Mlu_00653.mRNA1	158
Mlu_00654.mRNA1	0
Mlu_00655.mRNA1	0
Mlu_00656.mRNA1	41
Mlu_00657.mRNA1	0
Mlu_00658.mRNA1	3
Mlu_00659.mRNA1	2734
Mlu_00660.mRNA1	27
Mlu_00661.mRNA1	50
Mlu_00662.mRNA1	152
Mlu_00663.mRNA1	0
Mlu_00664.mRNA1	47
Mlu_00665.mRNA1	0
Mlu_00666.mRNA1	30
Mlu_00667.mRNA1	67
Mlu_00668.mRNA1	9
Mlu_00669.mRNA1	1
Mlu_00670.mRNA1	0
Mlu_00671.mRNA1	180
Mlu_00672.mRNA1	18
Mlu_00673.mRNA1	0
Mlu_00674.mRNA1	7
Mlu_00675.mRNA1	2
Mlu_00676.mRNA1	420
Mlu_00677.mRNA1	158
Mlu_00678.mRNA1	4
Mlu_00679.mRNA1	801
Mlu_00680.mRNA1	332
Mlu_00681.mRNA1	61
Mlu_00682.mRNA1	311
Mlu_00683.mRNA1	501
Mlu_00684.mRNA1	2
Mlu_00685.mRNA1	41
Mlu_00686.mRNA1	849
Mlu_00687.mRNA1	1727
Mlu_00688.mRNA1	147
Mlu_00689.mRNA1	8
Mlu_00690.mRNA1	0
Mlu_00691.mRNA1	0
Mlu_00692.mRNA1	0
Mlu_00693.mRNA1	1
Mlu_00694.mRNA1	196
Mlu_00695.mRNA1	295
Mlu_00696.mRNA1	158
Mlu_00697.mRNA1	0
Mlu_00698.mRNA1	106
Mlu_00699.mRNA1	0
Mlu_00700.mRNA1	179
Mlu_00701.mRNA1	70
Mlu_00702.mRNA1	0
Mlu_00703.mRNA1	11
Mlu_00704.mRNA1	1025
Mlu_00705.mRNA1	188
Mlu_00706.mRNA1	752
Mlu_00707.mRNA1	44
Mlu_00708.mRNA1	132
Mlu_00709.mRNA1	166
Mlu_00710.mRNA1	53
Mlu_00711.mRNA1	16
Mlu_00712.mRNA1	49
Mlu_00713.mRNA1	426
Mlu_00714.mRNA1	477
Mlu_00715.mRNA1	0
Mlu_00716.mRNA1	186
Mlu_00717.mRNA1	45
Mlu_00718.mRNA1	92
Mlu_00719.mRNA1	136
Mlu_00720.mRNA1	33
Mlu_00721.mRNA1	266
Mlu_00722.mRNA1	5082
Mlu_00723.mRNA1	1
Mlu_00724.mRNA1	154
Mlu_00725.mRNA1	1609
Mlu_00726.mRNA1	0
Mlu_00727.mRNA1	27
Mlu_00728.mRNA1	1
Mlu_00729.mRNA1	1
Mlu_00730.mRNA1	50
Mlu_00731.mRNA1	796
Mlu_00732.mRNA1	5
Mlu_00733.mRNA1	64
Mlu_00734.mRNA1	47
Mlu_00735.mRNA1	0
Mlu_00736.mRNA1	210
Mlu_00737.mRNA1	814
Mlu_00738.mRNA1	881
Mlu_00739.mRNA1	248
Mlu_00740.mRNA1	0
Mlu_00741.mRNA1	0
Mlu_00742.mRNA1	7
Mlu_00743.mRNA1	427
Mlu_00744.mRNA1	82
Mlu_00745.mRNA1	409
Mlu_00746.mRNA1	19
Mlu_00747.mRNA1	55
Mlu_00748.mRNA1	28
Mlu_00749.mRNA1	4
Mlu_00750.mRNA1	0
Mlu_00751.mRNA1	0
Mlu_00752.mRNA1	0
Mlu_00753.mRNA1	1222
Mlu_00754.mRNA1	0
Mlu_00755.mRNA1	123
Mlu_00756.mRNA1	172
Mlu_00757.mRNA1	28
Mlu_00758.mRNA1	125
Mlu_00759.mRNA1	129
Mlu_00760.mRNA1	504
Mlu_00761.mRNA1	315
Mlu_00762.mRNA1	0
Mlu_00763.mRNA1	25
Mlu_00764.mRNA1	71
Mlu_00765.mRNA1	2816
Mlu_00766.mRNA1	1235
Mlu_00767.mRNA1	387
Mlu_00768.mRNA1	412
Mlu_00769.mRNA1	0
Mlu_00770.mRNA1	794
Mlu_00771.mRNA1	399
Mlu_00772.mRNA1	80
Mlu_00773.mRNA1	0
Mlu_00774.mRNA1	1
Mlu_00775.mRNA1	376
Mlu_00776.mRNA1	0
Mlu_00777.mRNA1	167
Mlu_00778.mRNA1	102
Mlu_00779.mRNA1	556
Mlu_00780.mRNA1	517
Mlu_00781.mRNA1	1
Mlu_00782.mRNA1	0
Mlu_00783.mRNA1	527
Mlu_00784.mRNA1	683
Mlu_00785.mRNA1	1
Mlu_00786.mRNA1	0
Mlu_00787.mRNA1	0
Mlu_00788.mRNA1	9
Mlu_00789.mRNA1	387
Mlu_00790.mRNA1	2
Mlu_00791.mRNA1	0
Mlu_00792.mRNA1	35
Mlu_00793.mRNA1	214
Mlu_00794.mRNA1	0
Mlu_00795.mRNA1	0
Mlu_00796.mRNA1	277
Mlu_00797.mRNA1	0
Mlu_00798.mRNA1	1918
Mlu_00799.mRNA1	43
Mlu_00800.mRNA1	2
Mlu_00801.mRNA1	2
Mlu_00802.mRNA1	190
Mlu_00803.mRNA1	14
Mlu_00804.mRNA1	653
Mlu_00805.mRNA1	281
Mlu_00806.mRNA1	82
Mlu_00807.mRNA1	647
Mlu_00808.mRNA1	163
Mlu_00809.mRNA1	487
Mlu_00810.mRNA1	177
Mlu_00811.mRNA1	260
Mlu_00812.mRNA1	5
Mlu_00813.mRNA1	0
Mlu_00814.mRNA1	899
Mlu_00815.mRNA1	418
Mlu_00816.mRNA1	26
Mlu_00817.mRNA1	715
Mlu_00818.mRNA1	1718
Mlu_00819.mRNA1	61
Mlu_00820.mRNA1	12
Mlu_00821.mRNA1	181
Mlu_00822.mRNA1	17
Mlu_00823.mRNA1	119
Mlu_00824.mRNA1	187
Mlu_00825.mRNA1	31
Mlu_00826.mRNA1	892
Mlu_00827.mRNA1	145
Mlu_00828.mRNA1	1247
Mlu_00829.mRNA1	915
Mlu_00830.mRNA1	1
Mlu_00831.mRNA1	182
Mlu_00832.mRNA1	67
Mlu_00833.mRNA1	927
Mlu_00834.mRNA1	143
Mlu_00835.mRNA1	159
Mlu_00836.mRNA1	29
Mlu_00837.mRNA1	2
Mlu_00838.mRNA1	261
Mlu_00839.mRNA1	0
Mlu_00840.mRNA1	19
Mlu_00841.mRNA1	120
Mlu_00842.mRNA1	344
Mlu_00843.mRNA1	4
Mlu_00844.mRNA1	0
Mlu_00845.mRNA1	40
Mlu_00846.mRNA1	30
Mlu_00847.mRNA1	442
Mlu_00848.mRNA1	0
Mlu_00849.mRNA1	0
Mlu_00850.mRNA1	60
Mlu_00851.mRNA1	8
Mlu_00852.mRNA1	1
Mlu_00853.mRNA1	0
Mlu_00854.mRNA1	47
Mlu_00855.mRNA1	43
Mlu_00856.mRNA1	115
Mlu_00857.mRNA1	10
Mlu_00858.mRNA1	132
Mlu_00859.mRNA1	2
Mlu_00860.mRNA1	208
Mlu_00861.mRNA1	191
Mlu_00862.mRNA1	16
Mlu_00863.mRNA1	0
Mlu_00864.mRNA1	187
Mlu_00865.mRNA1	212
Mlu_00866.mRNA1	69
Mlu_00867.mRNA1	975
Mlu_00868.mRNA1	87
Mlu_00869.mRNA1	166
Mlu_00870.mRNA1	0
Mlu_00871.mRNA1	55
Mlu_00872.mRNA1	8
Mlu_00873.mRNA1	2690
Mlu_00874.mRNA1	2
Mlu_00875.mRNA1	462
Mlu_00876.mRNA1	1
Mlu_00877.mRNA1	191
Mlu_00878.mRNA1	1052
Mlu_00879.mRNA1	1804
Mlu_00880.mRNA1	111
Mlu_00881.mRNA1	117
Mlu_00882.mRNA1	49
Mlu_00883.mRNA1	317
Mlu_00884.mRNA1	119
Mlu_00885.mRNA1	231
Mlu_00886.mRNA1	646
Mlu_00887.mRNA1	132
Mlu_00888.mRNA1	39
Mlu_00889.mRNA1	100
Mlu_00890.mRNA1	0
Mlu_00891.mRNA1	156
Mlu_00892.mRNA1	210
Mlu_00893.mRNA1	294
Mlu_00894.mRNA1	687
Mlu_00895.mRNA1	278
Mlu_00896.mRNA1	0
Mlu_00897.mRNA1	129
Mlu_00898.mRNA1	0
Mlu_00899.mRNA1	88
Mlu_00900.mRNA1	12
Mlu_00901.mRNA1	419
Mlu_00902.mRNA1	0
Mlu_00903.mRNA1	210
Mlu_00904.mRNA1	0
Mlu_00905.mRNA1	844
Mlu_00906.mRNA1	16
Mlu_00907.mRNA1	2
Mlu_00908.mRNA1	0
Mlu_00909.mRNA1	29
Mlu_00910.mRNA1	0
Mlu_00911.mRNA1	37
Mlu_00912.mRNA1	45
Mlu_00913.mRNA1	115
Mlu_00914.mRNA1	230
Mlu_00915.mRNA1	0
Mlu_00916.mRNA1	173
Mlu_00917.mRNA1	0
Mlu_00918.mRNA1	0
Mlu_00919.mRNA1	5
Mlu_00920.mRNA1	0
Mlu_00921.mRNA1	480
Mlu_00922.mRNA1	1182
Mlu_00923.mRNA1	955
Mlu_00924.mRNA1	147
Mlu_00925.mRNA1	333
Mlu_00926.mRNA1	0
Mlu_00927.mRNA1	360
Mlu_00928.mRNA1	98
Mlu_00929.mRNA1	0
Mlu_00930.mRNA1	0
Mlu_00931.mRNA1	1
Mlu_00932.mRNA1	0
Mlu_00933.mRNA1	0
Mlu_00934.mRNA1	309
Mlu_00935.mRNA1	0
Mlu_00936.mRNA1	1
Mlu_00937.mRNA1	0
Mlu_00938.mRNA1	5
Mlu_00939.mRNA1	12
Mlu_00940.mRNA1	99
Mlu_00941.mRNA1	396
Mlu_00942.mRNA1	384
Mlu_00943.mRNA1	1909
Mlu_00944.mRNA1	280
Mlu_00945.mRNA1	45
Mlu_00946.mRNA1	405
Mlu_00947.mRNA1	262
Mlu_00948.mRNA1	26
Mlu_00949.mRNA1	1436
Mlu_00950.mRNA1	6
Mlu_00951.mRNA1	523
Mlu_00952.mRNA1	2
Mlu_00953.mRNA1	0
Mlu_00954.mRNA1	18
Mlu_00955.mRNA1	3131
Mlu_00956.mRNA1	42
Mlu_00957.mRNA1	10
Mlu_00958.mRNA1	0
Mlu_00959.mRNA1	0
Mlu_00960.mRNA1	490
Mlu_00961.mRNA1	1076
Mlu_00962.mRNA1	111
Mlu_00963.mRNA1	388
Mlu_00964.mRNA1	33
Mlu_00965.mRNA1	67
Mlu_00966.mRNA1	732
Mlu_00967.mRNA1	62
Mlu_00968.mRNA1	71
Mlu_00969.mRNA1	115
Mlu_00970.mRNA1	28
Mlu_00971.mRNA1	974
Mlu_00972.mRNA1	147
Mlu_00973.mRNA1	119
Mlu_00974.mRNA1	163
Mlu_00975.mRNA1	12
Mlu_00976.mRNA1	206
Mlu_00977.mRNA1	331
Mlu_00978.mRNA1	503
Mlu_00979.mRNA1	30
Mlu_00980.mRNA1	3
Mlu_00981.mRNA1	2
Mlu_00982.mRNA1	0
Mlu_00983.mRNA1	15
Mlu_00984.mRNA1	14
Mlu_00985.mRNA1	20
Mlu_00986.mRNA1	281
Mlu_00987.mRNA1	42
Mlu_00988.mRNA1	0
Mlu_00989.mRNA1	11
Mlu_00990.mRNA1	1
Mlu_00991.mRNA1	25
Mlu_00992.mRNA1	19
Mlu_00993.mRNA1	0
Mlu_00994.mRNA1	134
Mlu_00995.mRNA1	1818
Mlu_00996.mRNA1	157
Mlu_00997.mRNA1	0
Mlu_00998.mRNA1	78
Mlu_00999.mRNA1	233
Mlu_01000.mRNA1	1
Mlu_01001.mRNA1	0
Mlu_01002.mRNA1	243
Mlu_01003.mRNA1	270
Mlu_01004.mRNA1	0
Mlu_01005.mRNA1	80
Mlu_01006.mRNA1	13475
Mlu_01007.mRNA1	9470
Mlu_01008.mRNA1	318
Mlu_01009.mRNA1	137
Mlu_01010.mRNA1	300
Mlu_01011.mRNA1	0
Mlu_01012.mRNA1	501
Mlu_01013.mRNA1	330
Mlu_01014.mRNA1	203
Mlu_01015.mRNA1	0
Mlu_01016.mRNA1	4075
Mlu_01017.mRNA1	21
Mlu_01018.mRNA1	495
Mlu_01019.mRNA1	1976
Mlu_01020.mRNA1	145
Mlu_01021.mRNA1	178
Mlu_01022.mRNA1	425
Mlu_01023.mRNA1	504
Mlu_01024.mRNA1	16
Mlu_01025.mRNA1	96
Mlu_01026.mRNA1	113
Mlu_01027.mRNA1	182
Mlu_01028.mRNA1	697
Mlu_01029.mRNA1	170
Mlu_01030.mRNA1	501
Mlu_01031.mRNA1	38
Mlu_01032.mRNA1	904
Mlu_01033.mRNA1	389
Mlu_01034.mRNA1	101
Mlu_01035.mRNA1	125
Mlu_01036.mRNA1	2545
Mlu_01037.mRNA1	0
Mlu_01038.mRNA1	195
Mlu_01039.mRNA1	0
Mlu_01040.mRNA1	0
Mlu_01041.mRNA1	2
Mlu_01042.mRNA1	2
Mlu_01043.mRNA1	59
Mlu_01044.mRNA1	88
Mlu_01045.mRNA1	67
Mlu_01046.mRNA1	4
Mlu_01047.mRNA1	30
Mlu_01048.mRNA1	0
Mlu_01049.mRNA1	1240
Mlu_01050.mRNA1	504
Mlu_01051.mRNA1	0
Mlu_01052.mRNA1	0
Mlu_01053.mRNA1	461
Mlu_01054.mRNA1	129
Mlu_01055.mRNA1	806
Mlu_01056.mRNA1	2085
Mlu_01057.mRNA1	1220
Mlu_01058.mRNA1	951
Mlu_01059.mRNA1	42
Mlu_01060.mRNA1	132
Mlu_01061.mRNA1	0
Mlu_01062.mRNA1	25
Mlu_01063.mRNA1	0
Mlu_01064.mRNA1	367
Mlu_01065.mRNA1	0
Mlu_01066.mRNA1	0
Mlu_01067.mRNA1	18
Mlu_01068.mRNA1	83
Mlu_01069.mRNA1	36
Mlu_01070.mRNA1	78
Mlu_01071.mRNA1	169
Mlu_01072.mRNA1	232
Mlu_01073.mRNA1	0
Mlu_01074.mRNA1	0
Mlu_01075.mRNA1	323
Mlu_01076.mRNA1	110
Mlu_01077.mRNA1	43
Mlu_01078.mRNA1	8
Mlu_01079.mRNA1	20
Mlu_01080.mRNA1	0
Mlu_01081.mRNA1	0
Mlu_01082.mRNA1	0
Mlu_01083.mRNA1	0
Mlu_01084.mRNA1	0
Mlu_01085.mRNA1	0
Mlu_01086.mRNA1	8
Mlu_01087.mRNA1	0
Mlu_01088.mRNA1	1873
Mlu_01089.mRNA1	2035
Mlu_01090.mRNA1	1326
Mlu_01091.mRNA1	364
Mlu_01092.mRNA1	51
Mlu_01093.mRNA1	225
Mlu_01094.mRNA1	2
Mlu_01095.mRNA1	3088
Mlu_01096.mRNA1	152
Mlu_01097.mRNA1	0
Mlu_01098.mRNA1	0
Mlu_01099.mRNA1	215
Mlu_01100.mRNA1	0
Mlu_01101.mRNA1	388
Mlu_01102.mRNA1	95
Mlu_01103.mRNA1	17
Mlu_01104.mRNA1	4
Mlu_01105.mRNA1	0
Mlu_01106.mRNA1	188
Mlu_01107.mRNA1	0
Mlu_01108.mRNA1	8
Mlu_01109.mRNA1	19
Mlu_01110.mRNA1	161
Mlu_01111.mRNA1	10
Mlu_01112.mRNA1	29
Mlu_01113.mRNA1	1202
Mlu_01114.mRNA1	66
Mlu_01115.mRNA1	274
Mlu_01116.mRNA1	692
Mlu_01117.mRNA1	0
Mlu_01118.mRNA1	0
Mlu_01119.mRNA1	0
Mlu_01120.mRNA1	43
Mlu_01121.mRNA1	75
Mlu_01122.mRNA1	0
Mlu_01123.mRNA1	1
Mlu_01124.mRNA1	138
Mlu_01125.mRNA1	77
Mlu_01126.mRNA1	276
Mlu_01127.mRNA1	0
Mlu_01128.mRNA1	0
Mlu_01129.mRNA1	5
Mlu_01130.mRNA1	0
Mlu_01131.mRNA1	71
Mlu_01132.mRNA1	0
Mlu_01133.mRNA1	9
Mlu_01134.mRNA1	239
Mlu_01135.mRNA1	0
Mlu_01136.mRNA1	85
Mlu_01137.mRNA1	0
Mlu_01138.mRNA1	186
Mlu_01139.mRNA1	30
Mlu_01140.mRNA1	0
Mlu_01141.mRNA1	3
Mlu_01142.mRNA1	1283
Mlu_01143.mRNA1	175
Mlu_01144.mRNA1	15
Mlu_01145.mRNA1	72
Mlu_01146.mRNA1	7
Mlu_01147.mRNA1	35
Mlu_01148.mRNA1	293
Mlu_01149.mRNA1	684
Mlu_01150.mRNA1	0
Mlu_01151.mRNA1	1
Mlu_01152.mRNA1	18
Mlu_01153.mRNA1	69
Mlu_01154.mRNA1	0
Mlu_01155.mRNA1	581
Mlu_01156.mRNA1	41
Mlu_01157.mRNA1	156
Mlu_01158.mRNA1	28
Mlu_01159.mRNA1	36
Mlu_01160.mRNA1	219
Mlu_01161.mRNA1	0
Mlu_01162.mRNA1	0
Mlu_01163.mRNA1	0
Mlu_01164.mRNA1	247
Mlu_01165.mRNA1	13
Mlu_01166.mRNA1	8
Mlu_01167.mRNA1	60
Mlu_01168.mRNA1	64
Mlu_01169.mRNA1	170
Mlu_01170.mRNA1	112
Mlu_01171.mRNA1	575
Mlu_01172.mRNA1	346
Mlu_01173.mRNA1	279
Mlu_01174.mRNA1	0
Mlu_01175.mRNA1	0
Mlu_01176.mRNA1	326
Mlu_01177.mRNA1	0
Mlu_01178.mRNA1	44
Mlu_01179.mRNA1	3
Mlu_01180.mRNA1	0
Mlu_01181.mRNA1	0
Mlu_01182.mRNA1	1
Mlu_01183.mRNA1	0
Mlu_01184.mRNA1	0
Mlu_01185.mRNA1	306
Mlu_01186.mRNA1	63
Mlu_01187.mRNA1	165
Mlu_01188.mRNA1	27
Mlu_01189.mRNA1	383
Mlu_01190.mRNA1	1
Mlu_01191.mRNA1	0
Mlu_01192.mRNA1	65
Mlu_01193.mRNA1	842
Mlu_01194.mRNA1	327
Mlu_01195.mRNA1	3
Mlu_01196.mRNA1	1
Mlu_01197.mRNA1	106
Mlu_01198.mRNA1	20
Mlu_01199.mRNA1	281
Mlu_01200.mRNA1	119
Mlu_01201.mRNA1	292
Mlu_01202.mRNA1	272
Mlu_01203.mRNA1	8
Mlu_01204.mRNA1	54
Mlu_01205.mRNA1	325
Mlu_01206.mRNA1	23
Mlu_01207.mRNA1	2
Mlu_01208.mRNA1	0
Mlu_01209.mRNA1	53
Mlu_01210.mRNA1	25
Mlu_01211.mRNA1	2731
Mlu_01212.mRNA1	627
Mlu_01213.mRNA1	9
Mlu_01214.mRNA1	81
Mlu_01215.mRNA1	0
Mlu_01216.mRNA1	0
Mlu_01217.mRNA1	0
Mlu_01218.mRNA1	0
Mlu_01219.mRNA1	2
Mlu_01220.mRNA1	0
Mlu_01221.mRNA1	0
Mlu_01222.mRNA1	1
Mlu_01223.mRNA1	4
Mlu_01224.mRNA1	0
Mlu_01225.mRNA1	112
Mlu_01226.mRNA1	130
Mlu_01227.mRNA1	504
Mlu_01228.mRNA1	0
Mlu_01229.mRNA1	0
Mlu_01230.mRNA1	46
Mlu_01231.mRNA1	59
Mlu_01232.mRNA1	197
Mlu_01233.mRNA1	0
Mlu_01234.mRNA1	8
Mlu_01235.mRNA1	0
Mlu_01236.mRNA1	109
Mlu_01237.mRNA1	756
Mlu_01238.mRNA1	50
Mlu_01239.mRNA1	74
Mlu_01240.mRNA1	386
Mlu_01241.mRNA1	215
Mlu_01242.mRNA1	99
Mlu_01243.mRNA1	370
Mlu_01244.mRNA1	305
Mlu_01245.mRNA1	436
Mlu_01246.mRNA1	15
Mlu_01247.mRNA1	599
Mlu_01248.mRNA1	3
Mlu_01249.mRNA1	134
Mlu_01250.mRNA1	129
Mlu_01251.mRNA1	15
Mlu_01252.mRNA1	1
Mlu_01253.mRNA1	176
Mlu_01254.mRNA1	83
Mlu_01255.mRNA1	0
Mlu_01256.mRNA1	19
Mlu_01257.mRNA1	89
Mlu_01258.mRNA1	650
Mlu_01259.mRNA1	237
Mlu_01260.mRNA1	106
Mlu_01261.mRNA1	45
Mlu_01262.mRNA1	108
Mlu_01263.mRNA1	163
Mlu_01264.mRNA1	214
Mlu_01265.mRNA1	22
Mlu_01266.mRNA1	50
Mlu_01267.mRNA1	7
Mlu_01268.mRNA1	218
Mlu_01269.mRNA1	277
Mlu_01270.mRNA1	0
Mlu_01271.mRNA1	5
Mlu_01272.mRNA1	143
Mlu_01273.mRNA1	129
Mlu_01274.mRNA1	4
Mlu_01275.mRNA1	70
Mlu_01276.mRNA1	22
Mlu_01277.mRNA1	148
Mlu_01278.mRNA1	0
Mlu_01279.mRNA1	0
Mlu_01280.mRNA1	0
Mlu_01281.mRNA1	0
Mlu_01282.mRNA1	124
Mlu_01283.mRNA1	347
Mlu_01284.mRNA1	22
Mlu_01285.mRNA1	0
Mlu_01286.mRNA1	12
Mlu_01287.mRNA1	149
Mlu_01288.mRNA1	1
Mlu_01289.mRNA1	130
Mlu_01290.mRNA1	435
Mlu_01291.mRNA1	119
Mlu_01292.mRNA1	1
Mlu_01293.mRNA1	0
Mlu_01294.mRNA1	0
Mlu_01295.mRNA1	0
Mlu_01296.mRNA1	0
Mlu_01297.mRNA1	0
Mlu_01298.mRNA1	289
Mlu_01299.mRNA1	77
Mlu_01300.mRNA1	0
Mlu_01301.mRNA1	0
Mlu_01302.mRNA1	108
Mlu_01303.mRNA1	230
Mlu_01304.mRNA1	0
Mlu_01305.mRNA1	339
Mlu_01306.mRNA1	841
Mlu_01307.mRNA1	0
Mlu_01308.mRNA1	152
Mlu_01309.mRNA1	392
Mlu_01310.mRNA1	9
Mlu_01311.mRNA1	106
Mlu_01312.mRNA1	569
Mlu_01313.mRNA1	1548
Mlu_01314.mRNA1	13
Mlu_01315.mRNA1	56
Mlu_01316.mRNA1	462
Mlu_01317.mRNA1	269
Mlu_01318.mRNA1	0
Mlu_01319.mRNA1	336
Mlu_01320.mRNA1	1
Mlu_01321.mRNA1	246
Mlu_01322.mRNA1	36
Mlu_01323.mRNA1	0
Mlu_01324.mRNA1	12
Mlu_01325.mRNA1	3
Mlu_01326.mRNA1	18
Mlu_01327.mRNA1	5
Mlu_01328.mRNA1	588
Mlu_01329.mRNA1	17
Mlu_01330.mRNA1	0
Mlu_01331.mRNA1	475
Mlu_01332.mRNA1	845
Mlu_01333.mRNA1	0
Mlu_01334.mRNA1	124
Mlu_01335.mRNA1	33
Mlu_01336.mRNA1	0
Mlu_01337.mRNA1	0
Mlu_01338.mRNA1	698
Mlu_01339.mRNA1	254
Mlu_01340.mRNA1	1
Mlu_01341.mRNA1	25
Mlu_01342.mRNA1	2804
Mlu_01343.mRNA1	0
Mlu_01344.mRNA1	11
Mlu_01345.mRNA1	1014
Mlu_01346.mRNA1	21
Mlu_01347.mRNA1	1
Mlu_01348.mRNA1	359
Mlu_01349.mRNA1	2
Mlu_01350.mRNA1	560
Mlu_01351.mRNA1	11
Mlu_01352.mRNA1	0
Mlu_01353.mRNA1	6354
Mlu_01354.mRNA1	1
Mlu_01355.mRNA1	39
Mlu_01356.mRNA1	14
Mlu_01357.mRNA1	313
Mlu_01358.mRNA1	0
Mlu_01359.mRNA1	0
Mlu_01360.mRNA1	0
Mlu_01361.mRNA1	420
Mlu_01362.mRNA1	0
Mlu_01363.mRNA1	0
Mlu_01364.mRNA1	19
Mlu_01365.mRNA1	182
Mlu_01366.mRNA1	190
Mlu_01367.mRNA1	273
Mlu_01368.mRNA1	1231
Mlu_01369.mRNA1	136
Mlu_01370.mRNA1	65
Mlu_01371.mRNA1	166
Mlu_01372.mRNA1	257
Mlu_01373.mRNA1	174
Mlu_01374.mRNA1	865
Mlu_01375.mRNA1	199
Mlu_01376.mRNA1	93
Mlu_01377.mRNA1	198
Mlu_01378.mRNA1	395
Mlu_01379.mRNA1	175
Mlu_01380.mRNA1	70
Mlu_01381.mRNA1	45
Mlu_01382.mRNA1	3
Mlu_01383.mRNA1	116
Mlu_01384.mRNA1	495
Mlu_01385.mRNA1	8138
Mlu_01386.mRNA1	1
Mlu_01387.mRNA1	15
Mlu_01388.mRNA1	0
Mlu_01389.mRNA1	0
Mlu_01390.mRNA1	5
Mlu_01391.mRNA1	603
Mlu_01392.mRNA1	482
Mlu_01393.mRNA1	64
Mlu_01394.mRNA1	0
Mlu_01395.mRNA1	183
Mlu_01396.mRNA1	633
Mlu_01397.mRNA1	433
Mlu_01398.mRNA1	2
Mlu_01399.mRNA1	385
Mlu_01400.mRNA1	208
Mlu_01401.mRNA1	76
Mlu_01402.mRNA1	0
Mlu_01403.mRNA1	19
Mlu_01404.mRNA1	7
Mlu_01405.mRNA1	0
Mlu_01406.mRNA1	316
Mlu_01407.mRNA1	16
Mlu_01408.mRNA1	1548
Mlu_01409.mRNA1	10
Mlu_01410.mRNA1	297
Mlu_01411.mRNA1	146
Mlu_01412.mRNA1	471
Mlu_01413.mRNA1	0
Mlu_01414.mRNA1	458
Mlu_01415.mRNA1	16
Mlu_01416.mRNA1	857
Mlu_01417.mRNA1	2
Mlu_01418.mRNA1	35
Mlu_01419.mRNA1	96
Mlu_01420.mRNA1	160
Mlu_01421.mRNA1	10
Mlu_01422.mRNA1	0
Mlu_01423.mRNA1	3
Mlu_01424.mRNA1	0
Mlu_01425.mRNA1	319
Mlu_01426.mRNA1	747
Mlu_01427.mRNA1	359
Mlu_01428.mRNA1	238
Mlu_01429.mRNA1	0
Mlu_01430.mRNA1	162
Mlu_01431.mRNA1	44
Mlu_01432.mRNA1	199
Mlu_01433.mRNA1	5392
Mlu_01434.mRNA1	93
Mlu_01435.mRNA1	18
Mlu_01436.mRNA1	5
Mlu_01437.mRNA1	51
Mlu_01438.mRNA1	432
Mlu_01439.mRNA1	100
Mlu_01440.mRNA1	11
Mlu_01441.mRNA1	206
Mlu_01442.mRNA1	256
Mlu_01443.mRNA1	106
Mlu_01444.mRNA1	0
Mlu_01445.mRNA1	0
Mlu_01446.mRNA1	104
Mlu_01447.mRNA1	82
Mlu_01448.mRNA1	1
Mlu_01449.mRNA1	248
Mlu_01450.mRNA1	7216
Mlu_01451.mRNA1	89
Mlu_01452.mRNA1	132
Mlu_01453.mRNA1	4
Mlu_01454.mRNA1	6
Mlu_01455.mRNA1	179
Mlu_01456.mRNA1	263
Mlu_01457.mRNA1	363
Mlu_01458.mRNA1	0
Mlu_01459.mRNA1	0
Mlu_01460.mRNA1	221
Mlu_01461.mRNA1	1006
Mlu_01462.mRNA1	99
Mlu_01463.mRNA1	9
Mlu_01464.mRNA1	39
Mlu_01465.mRNA1	57
Mlu_01466.mRNA1	523
Mlu_01467.mRNA1	14
Mlu_01468.mRNA1	463
Mlu_01469.mRNA1	1
Mlu_01470.mRNA1	207
Mlu_01471.mRNA1	97
Mlu_01472.mRNA1	603
Mlu_01473.mRNA1	45
Mlu_01474.mRNA1	137
Mlu_01475.mRNA1	213
Mlu_01476.mRNA1	35
Mlu_01477.mRNA1	583
Mlu_01478.mRNA1	3648
Mlu_01479.mRNA1	145
Mlu_01480.mRNA1	95
Mlu_01481.mRNA1	555
Mlu_01482.mRNA1	213
Mlu_01483.mRNA1	1302
Mlu_01484.mRNA1	824
Mlu_01485.mRNA1	351
Mlu_01486.mRNA1	812
Mlu_01487.mRNA1	0
Mlu_01488.mRNA1	1
Mlu_01489.mRNA1	260
Mlu_01490.mRNA1	27
Mlu_01491.mRNA1	2
Mlu_01492.mRNA1	11
Mlu_01493.mRNA1	0
Mlu_01494.mRNA1	0
Mlu_01495.mRNA1	0
Mlu_01496.mRNA1	0
Mlu_01497.mRNA1	0
Mlu_01498.mRNA1	119
Mlu_01499.mRNA1	71
Mlu_01500.mRNA1	43
Mlu_01501.mRNA1	7
Mlu_01502.mRNA1	0
Mlu_01503.mRNA1	62
Mlu_01504.mRNA1	9
Mlu_01505.mRNA1	3
Mlu_01506.mRNA1	2634
Mlu_01507.mRNA1	371
Mlu_01508.mRNA1	354
Mlu_01509.mRNA1	0
Mlu_01510.mRNA1	129
Mlu_01511.mRNA1	1
Mlu_01512.mRNA1	274
Mlu_01513.mRNA1	290
Mlu_01514.mRNA1	0
Mlu_01515.mRNA1	387
Mlu_01516.mRNA1	433
Mlu_01517.mRNA1	1804
Mlu_01518.mRNA1	0
Mlu_01519.mRNA1	0
Mlu_01520.mRNA1	20
Mlu_01521.mRNA1	6
Mlu_01522.mRNA1	34
Mlu_01523.mRNA1	518
Mlu_01524.mRNA1	450
Mlu_01525.mRNA1	1
Mlu_01526.mRNA1	99
Mlu_01527.mRNA1	170
Mlu_01528.mRNA1	23
Mlu_01529.mRNA1	155
Mlu_01530.mRNA1	4
Mlu_01531.mRNA1	1001
Mlu_01532.mRNA1	9
Mlu_01533.mRNA1	44
Mlu_01534.mRNA1	262
Mlu_01535.mRNA1	396
Mlu_01536.mRNA1	47
Mlu_01537.mRNA1	1594
Mlu_01538.mRNA1	163
Mlu_01539.mRNA1	9
Mlu_01540.mRNA1	0
Mlu_01541.mRNA1	0
Mlu_01542.mRNA1	0
Mlu_01543.mRNA1	0
Mlu_01544.mRNA1	78
Mlu_01545.mRNA1	130
Mlu_01546.mRNA1	301
Mlu_01547.mRNA1	503
Mlu_01548.mRNA1	0
Mlu_01549.mRNA1	35
Mlu_01550.mRNA1	1544
Mlu_01551.mRNA1	189
Mlu_01552.mRNA1	459
Mlu_01553.mRNA1	0
Mlu_01554.mRNA1	1
Mlu_01555.mRNA1	0
Mlu_01556.mRNA1	0
Mlu_01557.mRNA1	341
Mlu_01558.mRNA1	7
Mlu_01559.mRNA1	759
Mlu_01560.mRNA1	6
Mlu_01561.mRNA1	24
Mlu_01562.mRNA1	1733
Mlu_01563.mRNA1	0
Mlu_01564.mRNA1	20
Mlu_01565.mRNA1	3
Mlu_01566.mRNA1	1357
Mlu_01567.mRNA1	163
Mlu_01568.mRNA1	57
Mlu_01569.mRNA1	81
Mlu_01570.mRNA1	0
Mlu_01571.mRNA1	3
Mlu_01572.mRNA1	272
Mlu_01573.mRNA1	13
Mlu_01574.mRNA1	66
Mlu_01575.mRNA1	785
Mlu_01576.mRNA1	3
Mlu_01577.mRNA1	4
Mlu_01578.mRNA1	43
Mlu_01579.mRNA1	1
Mlu_01580.mRNA1	199
Mlu_01581.mRNA1	536
Mlu_01582.mRNA1	0
Mlu_01583.mRNA1	71
Mlu_01584.mRNA1	259
Mlu_01585.mRNA1	1
Mlu_01586.mRNA1	0
Mlu_01587.mRNA1	2
Mlu_01588.mRNA1	1
Mlu_01589.mRNA1	0
Mlu_01590.mRNA1	1
Mlu_01591.mRNA1	0
Mlu_01592.mRNA1	0
Mlu_01593.mRNA1	249
Mlu_01594.mRNA1	613
Mlu_01595.mRNA1	2
Mlu_01596.mRNA1	98
Mlu_01597.mRNA1	1
Mlu_01598.mRNA1	0
Mlu_01599.mRNA1	176
Mlu_01600.mRNA1	0
Mlu_01601.mRNA1	88
Mlu_01602.mRNA1	177
Mlu_01603.mRNA1	13
Mlu_01604.mRNA1	274
Mlu_01605.mRNA1	447
Mlu_01606.mRNA1	106
Mlu_01607.mRNA1	13
Mlu_01608.mRNA1	720
Mlu_01609.mRNA1	182
Mlu_01610.mRNA1	65
Mlu_01611.mRNA1	0
Mlu_01612.mRNA1	298
Mlu_01613.mRNA1	0
Mlu_01614.mRNA1	0
Mlu_01615.mRNA1	138
Mlu_01616.mRNA1	7
Mlu_01617.mRNA1	0
Mlu_01618.mRNA1	1985
Mlu_01619.mRNA1	258
Mlu_01620.mRNA1	729
Mlu_01621.mRNA1	22
Mlu_01622.mRNA1	0
Mlu_01623.mRNA1	0
Mlu_01624.mRNA1	126
Mlu_01625.mRNA1	3
Mlu_01626.mRNA1	659
Mlu_01627.mRNA1	235
Mlu_01628.mRNA1	53
Mlu_01629.mRNA1	650
Mlu_01630.mRNA1	0
Mlu_01631.mRNA1	0
Mlu_01632.mRNA1	0
Mlu_01633.mRNA1	44
Mlu_01634.mRNA1	80
Mlu_01635.mRNA1	409
Mlu_01636.mRNA1	55
Mlu_01637.mRNA1	0
Mlu_01638.mRNA1	0
Mlu_01639.mRNA1	249
Mlu_01640.mRNA1	673
Mlu_01641.mRNA1	73
Mlu_01642.mRNA1	76
Mlu_01643.mRNA1	1
Mlu_01644.mRNA1	182
Mlu_01645.mRNA1	241
Mlu_01646.mRNA1	290
Mlu_01647.mRNA1	15
Mlu_01648.mRNA1	21
Mlu_01649.mRNA1	53
Mlu_01650.mRNA1	389
Mlu_01651.mRNA1	2
Mlu_01652.mRNA1	0
Mlu_01653.mRNA1	628
Mlu_01654.mRNA1	245
Mlu_01655.mRNA1	149
Mlu_01656.mRNA1	372
Mlu_01657.mRNA1	640
Mlu_01658.mRNA1	2537
Mlu_01659.mRNA1	55
Mlu_01660.mRNA1	75
Mlu_01661.mRNA1	33
Mlu_01662.mRNA1	12
Mlu_01663.mRNA1	924
Mlu_01664.mRNA1	129
Mlu_01665.mRNA1	118
Mlu_01666.mRNA1	0
Mlu_01667.mRNA1	0
Mlu_01668.mRNA1	132
Mlu_01669.mRNA1	0
Mlu_01670.mRNA1	37
Mlu_01671.mRNA1	222
Mlu_01672.mRNA1	187
Mlu_01673.mRNA1	2000
Mlu_01674.mRNA1	115
Mlu_01675.mRNA1	364
Mlu_01676.mRNA1	0
Mlu_01677.mRNA1	1147
Mlu_01678.mRNA1	3631
Mlu_01679.mRNA1	763
Mlu_01680.mRNA1	0
Mlu_01681.mRNA1	1332
Mlu_01682.mRNA1	299
Mlu_01683.mRNA1	24
Mlu_01684.mRNA1	1
Mlu_01685.mRNA1	54
Mlu_01686.mRNA1	170
Mlu_01687.mRNA1	235
Mlu_01688.mRNA1	3
Mlu_01689.mRNA1	320
Mlu_01690.mRNA1	72
Mlu_01691.mRNA1	231
Mlu_01692.mRNA1	120
Mlu_01693.mRNA1	906
Mlu_01694.mRNA1	79
Mlu_01695.mRNA1	987
Mlu_01696.mRNA1	824
Mlu_01697.mRNA1	42
Mlu_01698.mRNA1	351
Mlu_01699.mRNA1	184
Mlu_01700.mRNA1	33
Mlu_01701.mRNA1	0
Mlu_01702.mRNA1	242
Mlu_01703.mRNA1	55
Mlu_01704.mRNA1	0
Mlu_01705.mRNA1	0
Mlu_01706.mRNA1	108
Mlu_01707.mRNA1	0
Mlu_01708.mRNA1	4
Mlu_01709.mRNA1	18
Mlu_01710.mRNA1	687
Mlu_01711.mRNA1	0
Mlu_01712.mRNA1	83
Mlu_01713.mRNA1	1963
Mlu_01714.mRNA1	352
Mlu_01715.mRNA1	0
Mlu_01716.mRNA1	400
Mlu_01717.mRNA1	23
Mlu_01718.mRNA1	52
Mlu_01719.mRNA1	0
Mlu_01720.mRNA1	2
Mlu_01721.mRNA1	64
Mlu_01722.mRNA1	37
Mlu_01723.mRNA1	5
Mlu_01724.mRNA1	17
Mlu_01725.mRNA1	5
Mlu_01726.mRNA1	140
Mlu_01727.mRNA1	75
Mlu_01728.mRNA1	91
Mlu_01729.mRNA1	35
Mlu_01730.mRNA1	57
Mlu_01731.mRNA1	0
Mlu_01732.mRNA1	0
Mlu_01733.mRNA1	991
Mlu_01734.mRNA1	1704
Mlu_01735.mRNA1	0
Mlu_01736.mRNA1	28
Mlu_01737.mRNA1	0
Mlu_01738.mRNA1	199
Mlu_01739.mRNA1	0
Mlu_01740.mRNA1	1
Mlu_01741.mRNA1	0
Mlu_01742.mRNA1	0
Mlu_01743.mRNA1	20
Mlu_01744.mRNA1	256
Mlu_01745.mRNA1	229
Mlu_01746.mRNA1	50
Mlu_01747.mRNA1	445
Mlu_01748.mRNA1	1575
Mlu_01749.mRNA1	19
Mlu_01750.mRNA1	45
Mlu_01751.mRNA1	133
Mlu_01752.mRNA1	105
Mlu_01753.mRNA1	1
Mlu_01754.mRNA1	249
Mlu_01755.mRNA1	6
Mlu_01756.mRNA1	1
Mlu_01757.mRNA1	763
Mlu_01758.mRNA1	38
Mlu_01759.mRNA1	311
Mlu_01760.mRNA1	0
Mlu_01761.mRNA1	1
Mlu_01762.mRNA1	22
Mlu_01763.mRNA1	861
Mlu_01764.mRNA1	210
Mlu_01765.mRNA1	0
Mlu_01766.mRNA1	0
Mlu_01767.mRNA1	362
Mlu_01768.mRNA1	144
Mlu_01769.mRNA1	0
Mlu_01770.mRNA1	44
Mlu_01771.mRNA1	71
Mlu_01772.mRNA1	1050
Mlu_01773.mRNA1	0
Mlu_01774.mRNA1	0
Mlu_01775.mRNA1	0
Mlu_01776.mRNA1	40
Mlu_01777.mRNA1	0
Mlu_01778.mRNA1	0
Mlu_01779.mRNA1	0
Mlu_01780.mRNA1	0
Mlu_01781.mRNA1	0
Mlu_01782.mRNA1	3
Mlu_01783.mRNA1	0
Mlu_01784.mRNA1	0
Mlu_01785.mRNA1	44
Mlu_01786.mRNA1	0
Mlu_01787.mRNA1	37
Mlu_01788.mRNA1	1220
Mlu_01789.mRNA1	835
Mlu_01790.mRNA1	0
Mlu_01791.mRNA1	1
Mlu_01792.mRNA1	123
Mlu_01793.mRNA1	565
Mlu_01794.mRNA1	0
Mlu_01795.mRNA1	0
Mlu_01796.mRNA1	63
Mlu_01797.mRNA1	84
Mlu_01798.mRNA1	12
Mlu_01799.mRNA1	175
Mlu_01800.mRNA1	3
Mlu_01801.mRNA1	176
Mlu_01802.mRNA1	298
Mlu_01803.mRNA1	213
Mlu_01804.mRNA1	0
Mlu_01805.mRNA1	148
Mlu_01806.mRNA1	312
Mlu_01807.mRNA1	60
Mlu_01808.mRNA1	4
Mlu_01809.mRNA1	0
Mlu_01810.mRNA1	328
Mlu_01811.mRNA1	470
Mlu_01812.mRNA1	2
Mlu_01813.mRNA1	38
Mlu_01814.mRNA1	1
Mlu_01815.mRNA1	17
Mlu_01816.mRNA1	200
Mlu_01817.mRNA1	1
Mlu_01818.mRNA1	201
Mlu_01819.mRNA1	434
Mlu_01820.mRNA1	67
Mlu_01821.mRNA1	12
Mlu_01822.mRNA1	121
Mlu_01823.mRNA1	79
Mlu_01824.mRNA1	10
Mlu_01825.mRNA1	0
Mlu_01826.mRNA1	204
Mlu_01827.mRNA1	188
Mlu_01828.mRNA1	376
Mlu_01829.mRNA1	1
Mlu_01830.mRNA1	0
Mlu_01831.mRNA1	18
Mlu_01832.mRNA1	1
Mlu_01833.mRNA1	67
Mlu_01834.mRNA1	103
Mlu_01835.mRNA1	31
Mlu_01836.mRNA1	10
Mlu_01837.mRNA1	40
Mlu_01838.mRNA1	265
Mlu_01839.mRNA1	24
Mlu_01840.mRNA1	153
Mlu_01841.mRNA1	1101
Mlu_01842.mRNA1	86
Mlu_01843.mRNA1	1
Mlu_01844.mRNA1	0
Mlu_01845.mRNA1	19
Mlu_01846.mRNA1	1450
Mlu_01847.mRNA1	40
Mlu_01848.mRNA1	3
Mlu_01849.mRNA1	32
Mlu_01850.mRNA1	1757
Mlu_01851.mRNA1	87
Mlu_01852.mRNA1	12
Mlu_01853.mRNA1	523
Mlu_01854.mRNA1	332
Mlu_01855.mRNA1	683
Mlu_01856.mRNA1	15
Mlu_01857.mRNA1	10
Mlu_01858.mRNA1	457
Mlu_01859.mRNA1	1
Mlu_01860.mRNA1	0
Mlu_01861.mRNA1	348
Mlu_01862.mRNA1	136
Mlu_01863.mRNA1	429
Mlu_01864.mRNA1	82
Mlu_01865.mRNA1	52
Mlu_01866.mRNA1	350
Mlu_01867.mRNA1	0
Mlu_01868.mRNA1	0
Mlu_01869.mRNA1	137
Mlu_01870.mRNA1	254
Mlu_01871.mRNA1	174
Mlu_01872.mRNA1	0
Mlu_01873.mRNA1	0
Mlu_01874.mRNA1	1
Mlu_01875.mRNA1	38
Mlu_01876.mRNA1	1
Mlu_01877.mRNA1	1
Mlu_01878.mRNA1	2102
Mlu_01879.mRNA1	63
Mlu_01880.mRNA1	1367
Mlu_01881.mRNA1	554
Mlu_01882.mRNA1	2
Mlu_01883.mRNA1	2
Mlu_01884.mRNA1	54
Mlu_01885.mRNA1	0
Mlu_01886.mRNA1	1
Mlu_01887.mRNA1	30
Mlu_01888.mRNA1	27
Mlu_01889.mRNA1	280
Mlu_01890.mRNA1	0
Mlu_01891.mRNA1	172
Mlu_01892.mRNA1	0
Mlu_01893.mRNA1	0
Mlu_01894.mRNA1	6
Mlu_01895.mRNA1	0
Mlu_01896.mRNA1	86
Mlu_01897.mRNA1	3
Mlu_01898.mRNA1	1
Mlu_01899.mRNA1	284
Mlu_01900.mRNA1	425
Mlu_01901.mRNA1	188
Mlu_01902.mRNA1	99
Mlu_01903.mRNA1	195
Mlu_01904.mRNA1	0
Mlu_01905.mRNA1	3798
Mlu_01906.mRNA1	0
Mlu_01907.mRNA1	159
Mlu_01908.mRNA1	207
Mlu_01909.mRNA1	21
Mlu_01910.mRNA1	0
Mlu_01911.mRNA1	1
Mlu_01912.mRNA1	558
Mlu_01913.mRNA1	3899
Mlu_01914.mRNA1	279
Mlu_01915.mRNA1	304
Mlu_01916.mRNA1	1887
Mlu_01917.mRNA1	218
Mlu_01918.mRNA1	31
Mlu_01919.mRNA1	0
Mlu_01920.mRNA1	140
Mlu_01921.mRNA1	2
Mlu_01922.mRNA1	168
Mlu_01923.mRNA1	1491
Mlu_01924.mRNA1	996
Mlu_01925.mRNA1	1
Mlu_01926.mRNA1	211
Mlu_01927.mRNA1	2987
Mlu_01928.mRNA1	85
Mlu_01929.mRNA1	14
Mlu_01930.mRNA1	372
Mlu_01931.mRNA1	287
Mlu_01932.mRNA1	56
Mlu_01933.mRNA1	0
Mlu_01934.mRNA1	2
Mlu_01935.mRNA1	2
Mlu_01936.mRNA1	366
Mlu_01937.mRNA1	0
Mlu_01938.mRNA1	244
Mlu_01939.mRNA1	46
Mlu_01940.mRNA1	432
Mlu_01941.mRNA1	425
Mlu_01942.mRNA1	713
Mlu_01943.mRNA1	1
Mlu_01944.mRNA1	102
Mlu_01945.mRNA1	361
Mlu_01946.mRNA1	2
Mlu_01947.mRNA1	0
Mlu_01948.mRNA1	6
Mlu_01949.mRNA1	2
Mlu_01950.mRNA1	125
Mlu_01951.mRNA1	2
Mlu_01952.mRNA1	1
Mlu_01953.mRNA1	11
Mlu_01954.mRNA1	0
Mlu_01955.mRNA1	0
Mlu_01956.mRNA1	420
Mlu_01957.mRNA1	68
Mlu_01958.mRNA1	253
Mlu_01959.mRNA1	0
Mlu_01960.mRNA1	91
Mlu_01961.mRNA1	29
Mlu_01962.mRNA1	0
Mlu_01963.mRNA1	69
Mlu_01964.mRNA1	0
Mlu_01965.mRNA1	0
Mlu_01966.mRNA1	5
Mlu_01967.mRNA1	164
Mlu_01968.mRNA1	0
Mlu_01969.mRNA1	36
Mlu_01970.mRNA1	285
Mlu_01971.mRNA1	22
Mlu_01972.mRNA1	5
Mlu_01973.mRNA1	0
Mlu_01974.mRNA1	210
Mlu_01975.mRNA1	21
Mlu_01976.mRNA1	2580
Mlu_01977.mRNA1	787
Mlu_01978.mRNA1	75
Mlu_01979.mRNA1	49
Mlu_01980.mRNA1	0
Mlu_01981.mRNA1	0
Mlu_01982.mRNA1	199
Mlu_01983.mRNA1	8
Mlu_01984.mRNA1	87
Mlu_01985.mRNA1	1
Mlu_01986.mRNA1	0
Mlu_01987.mRNA1	114
Mlu_01988.mRNA1	0
Mlu_01989.mRNA1	0
Mlu_01990.mRNA1	336
Mlu_01991.mRNA1	0
Mlu_01992.mRNA1	45
Mlu_01993.mRNA1	0
Mlu_01994.mRNA1	246
Mlu_01995.mRNA1	301
Mlu_01996.mRNA1	1
Mlu_01997.mRNA1	49
Mlu_01998.mRNA1	39
Mlu_01999.mRNA1	0
Mlu_02000.mRNA1	29
[truncated: 44,860 more rows]

## Sheet: S4
Mlu_00001.mRNA1	345
Mlu_00002.mRNA1	145
Mlu_00003.mRNA1	0
Mlu_00004.mRNA1	248
Mlu_00005.mRNA1	214
Mlu_00006.mRNA1	210
Mlu_00007.mRNA1	34
Mlu_00008.mRNA1	537
Mlu_00009.mRNA1	603
Mlu_00010.mRNA1	11
Mlu_00011.mRNA1	1
Mlu_00012.mRNA1	135
Mlu_00013.mRNA1	13
Mlu_00014.mRNA1	158
Mlu_00015.mRNA1	3
Mlu_00016.mRNA1	39
Mlu_00017.mRNA1	0
Mlu_00018.mRNA1	19
Mlu_00019.mRNA1	9
Mlu_00020.mRNA1	96
Mlu_00021.mRNA1	20
Mlu_00022.mRNA1	102
Mlu_00023.mRNA1	364
Mlu_00024.mRNA1	0
Mlu_00025.mRNA1	79
Mlu_00026.mRNA1	49
Mlu_00027.mRNA1	310
Mlu_00028.mRNA1	3
Mlu_00029.mRNA1	358
Mlu_00030.mRNA1	444
Mlu_00031.mRNA1	67
Mlu_00032.mRNA1	0
Mlu_00033.mRNA1	164
Mlu_00034.mRNA1	301
Mlu_00035.mRNA1	262
Mlu_00036.mRNA1	751
Mlu_00037.mRNA1	10
Mlu_00038.mRNA1	1102
Mlu_00039.mRNA1	22
Mlu_00040.mRNA1	7
Mlu_00041.mRNA1	6
Mlu_00042.mRNA1	1
Mlu_00043.mRNA1	0
Mlu_00044.mRNA1	305
Mlu_00045.mRNA1	368
Mlu_00046.mRNA1	26
Mlu_00047.mRNA1	0
Mlu_00048.mRNA1	100
Mlu_00049.mRNA1	0
Mlu_00050.mRNA1	4255
Mlu_00051.mRNA1	0
Mlu_00052.mRNA1	0
Mlu_00053.mRNA1	0
Mlu_00054.mRNA1	0
Mlu_00055.mRNA1	1
Mlu_00056.mRNA1	0
Mlu_00057.mRNA1	4
Mlu_00058.mRNA1	25
Mlu_00059.mRNA1	217
Mlu_00060.mRNA1	8
Mlu_00061.mRNA1	1356
Mlu_00062.mRNA1	1
Mlu_00063.mRNA1	170
Mlu_00064.mRNA1	189
Mlu_00065.mRNA1	1168
Mlu_00066.mRNA1	14
Mlu_00067.mRNA1	4023
Mlu_00068.mRNA1	171
Mlu_00069.mRNA1	0
Mlu_00070.mRNA1	24
Mlu_00071.mRNA1	3
Mlu_00072.mRNA1	224
Mlu_00073.mRNA1	248
Mlu_00074.mRNA1	1
Mlu_00075.mRNA1	0
Mlu_00076.mRNA1	0
Mlu_00077.mRNA1	6
Mlu_00078.mRNA1	0
Mlu_00079.mRNA1	334
Mlu_00080.mRNA1	1
Mlu_00081.mRNA1	132
Mlu_00082.mRNA1	0
Mlu_00083.mRNA1	31
Mlu_00084.mRNA1	194
Mlu_00085.mRNA1	23
Mlu_00086.mRNA1	610
Mlu_00087.mRNA1	456
Mlu_00088.mRNA1	1143
Mlu_00089.mRNA1	1688
Mlu_00090.mRNA1	1
Mlu_00091.mRNA1	7
Mlu_00092.mRNA1	483
Mlu_00093.mRNA1	508
Mlu_00094.mRNA1	437
Mlu_00095.mRNA1	5
Mlu_00096.mRNA1	42
Mlu_00097.mRNA1	0
Mlu_00098.mRNA1	0
Mlu_00099.mRNA1	0
Mlu_00100.mRNA1	10
Mlu_00101.mRNA1	5
Mlu_00102.mRNA1	316
Mlu_00103.mRNA1	5
Mlu_00104.mRNA1	1130
Mlu_00105.mRNA1	57
Mlu_00106.mRNA1	334
Mlu_00107.mRNA1	2
Mlu_00108.mRNA1	1145
Mlu_00109.mRNA1	1250
Mlu_00110.mRNA1	74
Mlu_00111.mRNA1	909
Mlu_00112.mRNA1	25
Mlu_00113.mRNA1	13
Mlu_00114.mRNA1	457
Mlu_00115.mRNA1	115
Mlu_00116.mRNA1	409
Mlu_00117.mRNA1	56
Mlu_00118.mRNA1	170
Mlu_00119.mRNA1	17
Mlu_00120.mRNA1	397
Mlu_00121.mRNA1	93
Mlu_00122.mRNA1	157
Mlu_00123.mRNA1	404
Mlu_00124.mRNA1	66
Mlu_00125.mRNA1	110
Mlu_00126.mRNA1	88
Mlu_00127.mRNA1	453
Mlu_00128.mRNA1	709
Mlu_00129.mRNA1	2031
Mlu_00130.mRNA1	62
Mlu_00131.mRNA1	229
Mlu_00132.mRNA1	675
Mlu_00133.mRNA1	9
Mlu_00134.mRNA1	44
Mlu_00135.mRNA1	4
Mlu_00136.mRNA1	6
Mlu_00137.mRNA1	0
Mlu_00138.mRNA1	31
Mlu_00139.mRNA1	0
Mlu_00140.mRNA1	213
Mlu_00141.mRNA1	51
Mlu_00142.mRNA1	152
Mlu_00143.mRNA1	181
Mlu_00144.mRNA1	272
Mlu_00145.mRNA1	0
Mlu_00146.mRNA1	0
Mlu_00147.mRNA1	33
Mlu_00148.mRNA1	0
Mlu_00149.mRNA1	30
Mlu_00150.mRNA1	308
Mlu_00151.mRNA1	24
Mlu_00152.mRNA1	223
Mlu_00153.mRNA1	0
Mlu_00154.mRNA1	401
Mlu_00155.mRNA1	164
Mlu_00156.mRNA1	6578
Mlu_00157.mRNA1	28
Mlu_00158.mRNA1	0
Mlu_00159.mRNA1	0
Mlu_00160.mRNA1	602
Mlu_00161.mRNA1	14
Mlu_00162.mRNA1	0
Mlu_00163.mRNA1	398
Mlu_00164.mRNA1	760
Mlu_00165.mRNA1	27
Mlu_00166.mRNA1	152
Mlu_00167.mRNA1	0
Mlu_00168.mRNA1	5
Mlu_00169.mRNA1	140
Mlu_00170.mRNA1	154
Mlu_00171.mRNA1	416
Mlu_00172.mRNA1	63
Mlu_00173.mRNA1	56
Mlu_00174.mRNA1	81
Mlu_00175.mRNA1	366
Mlu_00176.mRNA1	127
Mlu_00177.mRNA1	546
Mlu_00178.mRNA1	6
Mlu_00179.mRNA1	338
Mlu_00180.mRNA1	30
Mlu_00181.mRNA1	7
Mlu_00182.mRNA1	2
Mlu_00183.mRNA1	0
Mlu_00184.mRNA1	0
Mlu_00185.mRNA1	0
Mlu_00186.mRNA1	459
Mlu_00187.mRNA1	1234
Mlu_00188.mRNA1	1890
Mlu_00189.mRNA1	345
Mlu_00190.mRNA1	208
Mlu_00191.mRNA1	27
Mlu_00192.mRNA1	21
Mlu_00193.mRNA1	7
Mlu_00194.mRNA1	3
Mlu_00195.mRNA1	694
Mlu_00196.mRNA1	430
Mlu_00197.mRNA1	11
Mlu_00198.mRNA1	5
Mlu_00199.mRNA1	2
Mlu_00200.mRNA1	95
Mlu_00201.mRNA1	379
Mlu_00202.mRNA1	64
Mlu_00203.mRNA1	49
Mlu_00204.mRNA1	0
Mlu_00205.mRNA1	8
Mlu_00206.mRNA1	56
Mlu_00207.mRNA1	0
Mlu_00208.mRNA1	425
Mlu_00209.mRNA1	137
Mlu_00210.mRNA1	21
Mlu_00211.mRNA1	7
Mlu_00212.mRNA1	17
Mlu_00213.mRNA1	213
Mlu_00214.mRNA1	0
Mlu_00215.mRNA1	558
Mlu_00216.mRNA1	197
Mlu_00217.mRNA1	163
Mlu_00218.mRNA1	272
Mlu_00219.mRNA1	198
Mlu_00220.mRNA1	107
Mlu_00221.mRNA1	5
Mlu_00222.mRNA1	240
Mlu_00223.mRNA1	56
Mlu_00224.mRNA1	191
Mlu_00225.mRNA1	742
Mlu_00226.mRNA1	23
Mlu_00227.mRNA1	1565
Mlu_00228.mRNA1	8
Mlu_00229.mRNA1	78
Mlu_00230.mRNA1	114
Mlu_00231.mRNA1	0
Mlu_00232.mRNA1	0
Mlu_00233.mRNA1	9
Mlu_00234.mRNA1	0
Mlu_00235.mRNA1	208
Mlu_00236.mRNA1	172
Mlu_00237.mRNA1	1018
Mlu_00238.mRNA1	204
Mlu_00239.mRNA1	0
Mlu_00240.mRNA1	1
Mlu_00241.mRNA1	270
Mlu_00242.mRNA1	0
Mlu_00243.mRNA1	1
Mlu_00244.mRNA1	0
Mlu_00245.mRNA1	566
Mlu_00246.mRNA1	171
Mlu_00247.mRNA1	1106
Mlu_00248.mRNA1	162
Mlu_00249.mRNA1	289
Mlu_00250.mRNA1	162
Mlu_00251.mRNA1	5715
Mlu_00252.mRNA1	1198
Mlu_00253.mRNA1	660
Mlu_00254.mRNA1	360
Mlu_00255.mRNA1	2507
Mlu_00256.mRNA1	9
Mlu_00257.mRNA1	2527
Mlu_00258.mRNA1	341
Mlu_00259.mRNA1	0
Mlu_00260.mRNA1	0
Mlu_00261.mRNA1	225
Mlu_00262.mRNA1	2466
Mlu_00263.mRNA1	762
Mlu_00264.mRNA1	6
Mlu_00265.mRNA1	1
Mlu_00266.mRNA1	144
Mlu_00267.mRNA1	145
Mlu_00268.mRNA1	3246
Mlu_00269.mRNA1	1784
Mlu_00270.mRNA1	227
Mlu_00271.mRNA1	3386
Mlu_00272.mRNA1	85
Mlu_00273.mRNA1	3534
Mlu_00274.mRNA1	0
Mlu_00275.mRNA1	7
Mlu_00276.mRNA1	179
Mlu_00277.mRNA1	1
Mlu_00278.mRNA1	43
Mlu_00279.mRNA1	0
Mlu_00280.mRNA1	0
Mlu_00281.mRNA1	6
Mlu_00282.mRNA1	117
Mlu_00283.mRNA1	0
Mlu_00284.mRNA1	658
Mlu_00285.mRNA1	289
Mlu_00286.mRNA1	284
Mlu_00287.mRNA1	219
Mlu_00288.mRNA1	543
Mlu_00289.mRNA1	20
Mlu_00290.mRNA1	0
Mlu_00291.mRNA1	230
Mlu_00292.mRNA1	0
Mlu_00293.mRNA1	417
Mlu_00294.mRNA1	0
Mlu_00295.mRNA1	50
Mlu_00296.mRNA1	639
Mlu_00297.mRNA1	0
Mlu_00298.mRNA1	309
Mlu_00299.mRNA1	1718
Mlu_00300.mRNA1	104
Mlu_00301.mRNA1	245
Mlu_00302.mRNA1	572
Mlu_00303.mRNA1	101
Mlu_00304.mRNA1	1167
Mlu_00305.mRNA1	677
Mlu_00306.mRNA1	79
Mlu_00307.mRNA1	0
Mlu_00308.mRNA1	230
Mlu_00309.mRNA1	208
Mlu_00310.mRNA1	0
Mlu_00311.mRNA1	176
Mlu_00312.mRNA1	686
Mlu_00313.mRNA1	4
Mlu_00314.mRNA1	0
Mlu_00315.mRNA1	359
Mlu_00316.mRNA1	0
Mlu_00317.mRNA1	3
Mlu_00318.mRNA1	413
Mlu_00319.mRNA1	0
Mlu_00320.mRNA1	15
Mlu_00321.mRNA1	2
Mlu_00322.mRNA1	90
Mlu_00323.mRNA1	337
Mlu_00324.mRNA1	2429
Mlu_00325.mRNA1	37
Mlu_00326.mRNA1	1311
Mlu_00327.mRNA1	236
Mlu_00328.mRNA1	1
Mlu_00329.mRNA1	215
Mlu_00330.mRNA1	0
Mlu_00331.mRNA1	120
Mlu_00332.mRNA1	0
Mlu_00333.mRNA1	0
Mlu_00334.mRNA1	130
Mlu_00335.mRNA1	0
Mlu_00336.mRNA1	78
Mlu_00337.mRNA1	124
Mlu_00338.mRNA1	0
Mlu_00339.mRNA1	10
Mlu_00340.mRNA1	579
Mlu_00341.mRNA1	3146
Mlu_00342.mRNA1	470
Mlu_00343.mRNA1	92
Mlu_00344.mRNA1	282
Mlu_00345.mRNA1	90
Mlu_00346.mRNA1	125
Mlu_00347.mRNA1	2
Mlu_00348.mRNA1	177
Mlu_00349.mRNA1	802
Mlu_00350.mRNA1	4
Mlu_00351.mRNA1	0
Mlu_00352.mRNA1	9
Mlu_00353.mRNA1	629
Mlu_00354.mRNA1	4
Mlu_00355.mRNA1	142
Mlu_00356.mRNA1	0
Mlu_00357.mRNA1	0
Mlu_00358.mRNA1	33
Mlu_00359.mRNA1	225
Mlu_00360.mRNA1	1
Mlu_00361.mRNA1	9
Mlu_00362.mRNA1	1242
Mlu_00363.mRNA1	94
Mlu_00364.mRNA1	223
Mlu_00365.mRNA1	108
Mlu_00366.mRNA1	5
Mlu_00367.mRNA1	274
Mlu_00368.mRNA1	906
Mlu_00369.mRNA1	598
Mlu_00370.mRNA1	436
Mlu_00371.mRNA1	0
Mlu_00372.mRNA1	365
Mlu_00373.mRNA1	176
Mlu_00374.mRNA1	16
Mlu_00375.mRNA1	1045
Mlu_00376.mRNA1	26
Mlu_00377.mRNA1	271
Mlu_00378.mRNA1	274
Mlu_00379.mRNA1	1214
Mlu_00380.mRNA1	207
Mlu_00381.mRNA1	892
Mlu_00382.mRNA1	64
Mlu_00383.mRNA1	122
Mlu_00384.mRNA1	0
Mlu_00385.mRNA1	10
Mlu_00386.mRNA1	13
Mlu_00387.mRNA1	440
Mlu_00388.mRNA1	0
Mlu_00389.mRNA1	101
Mlu_00390.mRNA1	16
Mlu_00391.mRNA1	395
Mlu_00392.mRNA1	86
Mlu_00393.mRNA1	219
Mlu_00394.mRNA1	760
Mlu_00395.mRNA1	363
Mlu_00396.mRNA1	139
Mlu_00397.mRNA1	292
Mlu_00398.mRNA1	92
Mlu_00399.mRNA1	359
Mlu_00400.mRNA1	133
Mlu_00401.mRNA1	181
Mlu_00402.mRNA1	17
Mlu_00403.mRNA1	217
Mlu_00404.mRNA1	7
Mlu_00405.mRNA1	1121
Mlu_00406.mRNA1	538
Mlu_00407.mRNA1	30
Mlu_00408.mRNA1	123
Mlu_00409.mRNA1	0
Mlu_00410.mRNA1	114
Mlu_00411.mRNA1	218
Mlu_00412.mRNA1	924
Mlu_00413.mRNA1	0
Mlu_00414.mRNA1	128
Mlu_00415.mRNA1	0
Mlu_00416.mRNA1	213
Mlu_00417.mRNA1	88
Mlu_00418.mRNA1	154
Mlu_00419.mRNA1	611
Mlu_00420.mRNA1	249
Mlu_00421.mRNA1	68
Mlu_00422.mRNA1	3
Mlu_00423.mRNA1	272
Mlu_00424.mRNA1	43
Mlu_00425.mRNA1	3
Mlu_00426.mRNA1	40
Mlu_00427.mRNA1	0
Mlu_00428.mRNA1	8
Mlu_00429.mRNA1	38
Mlu_00430.mRNA1	312
Mlu_00431.mRNA1	1
Mlu_00432.mRNA1	125
Mlu_00433.mRNA1	3
Mlu_00434.mRNA1	82
Mlu_00435.mRNA1	110
Mlu_00436.mRNA1	783
Mlu_00437.mRNA1	78
Mlu_00438.mRNA1	22
Mlu_00439.mRNA1	21
Mlu_00440.mRNA1	403
Mlu_00441.mRNA1	687
Mlu_00442.mRNA1	42
Mlu_00443.mRNA1	68
Mlu_00444.mRNA1	233
Mlu_00445.mRNA1	0
Mlu_00446.mRNA1	1
Mlu_00447.mRNA1	1
Mlu_00448.mRNA1	5137
Mlu_00449.mRNA1	0
Mlu_00450.mRNA1	1
Mlu_00451.mRNA1	1248
Mlu_00452.mRNA1	25
Mlu_00453.mRNA1	1598
Mlu_00454.mRNA1	220
Mlu_00455.mRNA1	356
Mlu_00456.mRNA1	248
Mlu_00457.mRNA1	3
Mlu_00458.mRNA1	1
Mlu_00459.mRNA1	101
Mlu_00460.mRNA1	25
Mlu_00461.mRNA1	112
Mlu_00462.mRNA1	23
Mlu_00463.mRNA1	244
Mlu_00464.mRNA1	27
Mlu_00465.mRNA1	367
Mlu_00466.mRNA1	1
Mlu_00467.mRNA1	26
Mlu_00468.mRNA1	165
Mlu_00469.mRNA1	249
Mlu_00470.mRNA1	305
Mlu_00471.mRNA1	440
Mlu_00472.mRNA1	32
Mlu_00473.mRNA1	686
Mlu_00474.mRNA1	20
Mlu_00475.mRNA1	244
Mlu_00476.mRNA1	9588
Mlu_00477.mRNA1	116
Mlu_00478.mRNA1	0
Mlu_00479.mRNA1	0
Mlu_00480.mRNA1	391
Mlu_00481.mRNA1	513
Mlu_00482.mRNA1	4286
Mlu_00483.mRNA1	56
Mlu_00484.mRNA1	465
Mlu_00485.mRNA1	0
Mlu_00486.mRNA1	218
Mlu_00487.mRNA1	143
Mlu_00488.mRNA1	2734
Mlu_00489.mRNA1	1234
Mlu_00490.mRNA1	164
Mlu_00491.mRNA1	229
Mlu_00492.mRNA1	123
Mlu_00493.mRNA1	1668
Mlu_00494.mRNA1	227
Mlu_00495.mRNA1	0
Mlu_00496.mRNA1	0
Mlu_00497.mRNA1	136
Mlu_00498.mRNA1	0
Mlu_00499.mRNA1	80
Mlu_00500.mRNA1	11
Mlu_00501.mRNA1	144
Mlu_00502.mRNA1	10
Mlu_00503.mRNA1	433
Mlu_00504.mRNA1	88
Mlu_00505.mRNA1	2
Mlu_00506.mRNA1	0
Mlu_00507.mRNA1	95
Mlu_00508.mRNA1	0
Mlu_00509.mRNA1	274
Mlu_00510.mRNA1	1072
Mlu_00511.mRNA1	96
Mlu_00512.mRNA1	645
Mlu_00513.mRNA1	1
Mlu_00514.mRNA1	741
Mlu_00515.mRNA1	926
Mlu_00516.mRNA1	64
Mlu_00517.mRNA1	0
Mlu_00518.mRNA1	6
Mlu_00519.mRNA1	395
Mlu_00520.mRNA1	47
Mlu_00521.mRNA1	678
Mlu_00522.mRNA1	152
Mlu_00523.mRNA1	18
Mlu_00524.mRNA1	0
Mlu_00525.mRNA1	1626
Mlu_00526.mRNA1	0
Mlu_00527.mRNA1	2
Mlu_00528.mRNA1	251
Mlu_00529.mRNA1	140
Mlu_00530.mRNA1	0
Mlu_00531.mRNA1	0
Mlu_00532.mRNA1	7
Mlu_00533.mRNA1	67
Mlu_00534.mRNA1	575
Mlu_00535.mRNA1	73
Mlu_00536.mRNA1	26
Mlu_00537.mRNA1	61
Mlu_00538.mRNA1	1697
Mlu_00539.mRNA1	195
Mlu_00540.mRNA1	0
Mlu_00541.mRNA1	56
Mlu_00542.mRNA1	12
Mlu_00543.mRNA1	204
Mlu_00544.mRNA1	660
Mlu_00545.mRNA1	5
Mlu_00546.mRNA1	1
Mlu_00547.mRNA1	10
Mlu_00548.mRNA1	0
Mlu_00549.mRNA1	0
Mlu_00550.mRNA1	46
Mlu_00551.mRNA1	341
Mlu_00552.mRNA1	2398
Mlu_00553.mRNA1	8
Mlu_00554.mRNA1	735
Mlu_00555.mRNA1	23
Mlu_00556.mRNA1	0
Mlu_00557.mRNA1	0
Mlu_00558.mRNA1	42
Mlu_00559.mRNA1	0
Mlu_00560.mRNA1	754
Mlu_00561.mRNA1	279
Mlu_00562.mRNA1	2042
Mlu_00563.mRNA1	19
Mlu_00564.mRNA1	0
Mlu_00565.mRNA1	2
Mlu_00566.mRNA1	38
Mlu_00567.mRNA1	35
Mlu_00568.mRNA1	88
Mlu_00569.mRNA1	107
Mlu_00570.mRNA1	72
Mlu_00571.mRNA1	1069
Mlu_00572.mRNA1	209
Mlu_00573.mRNA1	33
Mlu_00574.mRNA1	269
Mlu_00575.mRNA1	134
Mlu_00576.mRNA1	0
Mlu_00577.mRNA1	0
Mlu_00578.mRNA1	891
Mlu_00579.mRNA1	9
Mlu_00580.mRNA1	64
Mlu_00581.mRNA1	525
Mlu_00582.mRNA1	5
Mlu_00583.mRNA1	96
Mlu_00584.mRNA1	269
Mlu_00585.mRNA1	193
Mlu_00586.mRNA1	233
Mlu_00587.mRNA1	1175
Mlu_00588.mRNA1	1
Mlu_00589.mRNA1	31
Mlu_00590.mRNA1	59
Mlu_00591.mRNA1	1963
Mlu_00592.mRNA1	20
Mlu_00593.mRNA1	47
Mlu_00594.mRNA1	645
Mlu_00595.mRNA1	9
Mlu_00596.mRNA1	1
Mlu_00597.mRNA1	0
Mlu_00598.mRNA1	23
Mlu_00599.mRNA1	66
Mlu_00600.mRNA1	733
Mlu_00601.mRNA1	4025
Mlu_00602.mRNA1	0
Mlu_00603.mRNA1	650
Mlu_00604.mRNA1	304
Mlu_00605.mRNA1	304
Mlu_00606.mRNA1	125
Mlu_00607.mRNA1	20
Mlu_00608.mRNA1	768
Mlu_00609.mRNA1	36
Mlu_00610.mRNA1	48
Mlu_00611.mRNA1	0
Mlu_00612.mRNA1	3
Mlu_00613.mRNA1	24
Mlu_00614.mRNA1	1767
Mlu_00615.mRNA1	454
Mlu_00616.mRNA1	0
Mlu_00617.mRNA1	295
Mlu_00618.mRNA1	0
Mlu_00619.mRNA1	0
Mlu_00620.mRNA1	473
Mlu_00621.mRNA1	633
Mlu_00622.mRNA1	1248
Mlu_00623.mRNA1	9
Mlu_00624.mRNA1	1777
Mlu_00625.mRNA1	6
Mlu_00626.mRNA1	18
Mlu_00627.mRNA1	1217
Mlu_00628.mRNA1	0
Mlu_00629.mRNA1	0
Mlu_00630.mRNA1	18
Mlu_00631.mRNA1	318
Mlu_00632.mRNA1	112
Mlu_00633.mRNA1	42
Mlu_00634.mRNA1	0
Mlu_00635.mRNA1	730
Mlu_00636.mRNA1	477
Mlu_00637.mRNA1	122
Mlu_00638.mRNA1	537
Mlu_00639.mRNA1	10
Mlu_00640.mRNA1	252
Mlu_00641.mRNA1	1
Mlu_00642.mRNA1	93
Mlu_00643.mRNA1	54
Mlu_00644.mRNA1	256
Mlu_00645.mRNA1	73
Mlu_00646.mRNA1	350
Mlu_00647.mRNA1	359
Mlu_00648.mRNA1	123
Mlu_00649.mRNA1	537
Mlu_00650.mRNA1	612
Mlu_00651.mRNA1	258
Mlu_00652.mRNA1	678
Mlu_00653.mRNA1	183
Mlu_00654.mRNA1	0
Mlu_00655.mRNA1	0
Mlu_00656.mRNA1	45
Mlu_00657.mRNA1	0
Mlu_00658.mRNA1	0
Mlu_00659.mRNA1	3093
Mlu_00660.mRNA1	27
Mlu_00661.mRNA1	57
Mlu_00662.mRNA1	117
Mlu_00663.mRNA1	3
Mlu_00664.mRNA1	63
Mlu_00665.mRNA1	0
Mlu_00666.mRNA1	23
Mlu_00667.mRNA1	70
Mlu_00668.mRNA1	5
Mlu_00669.mRNA1	0
Mlu_00670.mRNA1	3
Mlu_00671.mRNA1	275
Mlu_00672.mRNA1	26
Mlu_00673.mRNA1	0
Mlu_00674.mRNA1	4
Mlu_00675.mRNA1	1
Mlu_00676.mRNA1	170
Mlu_00677.mRNA1	152
Mlu_00678.mRNA1	6
Mlu_00679.mRNA1	555
Mlu_00680.mRNA1	398
Mlu_00681.mRNA1	89
Mlu_00682.mRNA1	265
Mlu_00683.mRNA1	459
Mlu_00684.mRNA1	0
Mlu_00685.mRNA1	45
Mlu_00686.mRNA1	1108
Mlu_00687.mRNA1	1838
Mlu_00688.mRNA1	156
Mlu_00689.mRNA1	10
Mlu_00690.mRNA1	0
Mlu_00691.mRNA1	0
Mlu_00692.mRNA1	0
Mlu_00693.mRNA1	2
Mlu_00694.mRNA1	98
Mlu_00695.mRNA1	295
Mlu_00696.mRNA1	208
Mlu_00697.mRNA1	0
Mlu_00698.mRNA1	126
Mlu_00699.mRNA1	6
Mlu_00700.mRNA1	245
Mlu_00701.mRNA1	31
Mlu_00702.mRNA1	0
Mlu_00703.mRNA1	16
Mlu_00704.mRNA1	1238
Mlu_00705.mRNA1	233
Mlu_00706.mRNA1	1034
Mlu_00707.mRNA1	54
Mlu_00708.mRNA1	139
Mlu_00709.mRNA1	179
Mlu_00710.mRNA1	59
Mlu_00711.mRNA1	24
Mlu_00712.mRNA1	15
Mlu_00713.mRNA1	405
Mlu_00714.mRNA1	525
Mlu_00715.mRNA1	4
Mlu_00716.mRNA1	186
Mlu_00717.mRNA1	23
Mlu_00718.mRNA1	75
Mlu_00719.mRNA1	146
Mlu_00720.mRNA1	35
Mlu_00721.mRNA1	162
Mlu_00722.mRNA1	4980
Mlu_00723.mRNA1	8
Mlu_00724.mRNA1	144
Mlu_00725.mRNA1	1727
Mlu_00726.mRNA1	0
Mlu_00727.mRNA1	33
Mlu_00728.mRNA1	0
Mlu_00729.mRNA1	0
Mlu_00730.mRNA1	44
Mlu_00731.mRNA1	791
Mlu_00732.mRNA1	19
Mlu_00733.mRNA1	85
Mlu_00734.mRNA1	35
Mlu_00735.mRNA1	0
Mlu_00736.mRNA1	271
Mlu_00737.mRNA1	1095
Mlu_00738.mRNA1	221
Mlu_00739.mRNA1	322
Mlu_00740.mRNA1	0
Mlu_00741.mRNA1	0
Mlu_00742.mRNA1	11
Mlu_00743.mRNA1	456
Mlu_00744.mRNA1	58
Mlu_00745.mRNA1	405
Mlu_00746.mRNA1	33
Mlu_00747.mRNA1	85
Mlu_00748.mRNA1	12
Mlu_00749.mRNA1	6
Mlu_00750.mRNA1	2
Mlu_00751.mRNA1	0
Mlu_00752.mRNA1	0
Mlu_00753.mRNA1	1338
Mlu_00754.mRNA1	1
Mlu_00755.mRNA1	105
Mlu_00756.mRNA1	213
Mlu_00757.mRNA1	35
Mlu_00758.mRNA1	126
Mlu_00759.mRNA1	128
Mlu_00760.mRNA1	664
Mlu_00761.mRNA1	360
Mlu_00762.mRNA1	1
Mlu_00763.mRNA1	30
Mlu_00764.mRNA1	55
Mlu_00765.mRNA1	3015
Mlu_00766.mRNA1	1097
Mlu_00767.mRNA1	350
Mlu_00768.mRNA1	349
Mlu_00769.mRNA1	0
Mlu_00770.mRNA1	928
Mlu_00771.mRNA1	435
Mlu_00772.mRNA1	91
Mlu_00773.mRNA1	1
Mlu_00774.mRNA1	3
Mlu_00775.mRNA1	355
Mlu_00776.mRNA1	3
Mlu_00777.mRNA1	282
Mlu_00778.mRNA1	83
Mlu_00779.mRNA1	677
Mlu_00780.mRNA1	558
Mlu_00781.mRNA1	3
Mlu_00782.mRNA1	0
Mlu_00783.mRNA1	589
Mlu_00784.mRNA1	891
Mlu_00785.mRNA1	0
Mlu_00786.mRNA1	0
Mlu_00787.mRNA1	0
Mlu_00788.mRNA1	10
Mlu_00789.mRNA1	444
Mlu_00790.mRNA1	2
Mlu_00791.mRNA1	0
Mlu_00792.mRNA1	39
Mlu_00793.mRNA1	183
Mlu_00794.mRNA1	0
Mlu_00795.mRNA1	1
Mlu_00796.mRNA1	351
Mlu_00797.mRNA1	0
Mlu_00798.mRNA1	2055
Mlu_00799.mRNA1	56
Mlu_00800.mRNA1	8
Mlu_00801.mRNA1	1
Mlu_00802.mRNA1	241
Mlu_00803.mRNA1	31
Mlu_00804.mRNA1	690
Mlu_00805.mRNA1	234
Mlu_00806.mRNA1	164
Mlu_00807.mRNA1	615
Mlu_00808.mRNA1	227
Mlu_00809.mRNA1	456
Mlu_00810.mRNA1	202
Mlu_00811.mRNA1	140
Mlu_00812.mRNA1	1
Mlu_00813.mRNA1	0
Mlu_00814.mRNA1	1037
Mlu_00815.mRNA1	479
Mlu_00816.mRNA1	13
Mlu_00817.mRNA1	772
Mlu_00818.mRNA1	1996
Mlu_00819.mRNA1	67
Mlu_00820.mRNA1	11
Mlu_00821.mRNA1	373
Mlu_00822.mRNA1	14
Mlu_00823.mRNA1	106
Mlu_00824.mRNA1	206
Mlu_00825.mRNA1	34
Mlu_00826.mRNA1	1128
Mlu_00827.mRNA1	123
Mlu_00828.mRNA1	1154
Mlu_00829.mRNA1	1082
Mlu_00830.mRNA1	5
Mlu_00831.mRNA1	189
Mlu_00832.mRNA1	59
Mlu_00833.mRNA1	1088
Mlu_00834.mRNA1	179
Mlu_00835.mRNA1	186
Mlu_00836.mRNA1	23
Mlu_00837.mRNA1	5
Mlu_00838.mRNA1	240
Mlu_00839.mRNA1	0
Mlu_00840.mRNA1	32
Mlu_00841.mRNA1	162
Mlu_00842.mRNA1	411
Mlu_00843.mRNA1	2
Mlu_00844.mRNA1	0
Mlu_00845.mRNA1	35
Mlu_00846.mRNA1	23
Mlu_00847.mRNA1	536
Mlu_00848.mRNA1	0
Mlu_00849.mRNA1	0
Mlu_00850.mRNA1	80
Mlu_00851.mRNA1	4
Mlu_00852.mRNA1	1
Mlu_00853.mRNA1	0
Mlu_00854.mRNA1	83
Mlu_00855.mRNA1	45
Mlu_00856.mRNA1	107
Mlu_00857.mRNA1	13
Mlu_00858.mRNA1	148
Mlu_00859.mRNA1	1
Mlu_00860.mRNA1	175
Mlu_00861.mRNA1	185
Mlu_00862.mRNA1	24
Mlu_00863.mRNA1	0
Mlu_00864.mRNA1	167
Mlu_00865.mRNA1	237
Mlu_00866.mRNA1	67
Mlu_00867.mRNA1	1292
Mlu_00868.mRNA1	101
Mlu_00869.mRNA1	151
Mlu_00870.mRNA1	0
Mlu_00871.mRNA1	70
Mlu_00872.mRNA1	18
Mlu_00873.mRNA1	1966
Mlu_00874.mRNA1	0
Mlu_00875.mRNA1	292
Mlu_00876.mRNA1	0
Mlu_00877.mRNA1	181
Mlu_00878.mRNA1	1273
Mlu_00879.mRNA1	2164
Mlu_00880.mRNA1	124
Mlu_00881.mRNA1	102
Mlu_00882.mRNA1	71
Mlu_00883.mRNA1	283
Mlu_00884.mRNA1	178
Mlu_00885.mRNA1	308
Mlu_00886.mRNA1	656
Mlu_00887.mRNA1	225
Mlu_00888.mRNA1	74
Mlu_00889.mRNA1	78
Mlu_00890.mRNA1	0
Mlu_00891.mRNA1	61
Mlu_00892.mRNA1	237
Mlu_00893.mRNA1	196
Mlu_00894.mRNA1	1112
Mlu_00895.mRNA1	307
Mlu_00896.mRNA1	0
Mlu_00897.mRNA1	177
Mlu_00898.mRNA1	0
Mlu_00899.mRNA1	72
Mlu_00900.mRNA1	12
Mlu_00901.mRNA1	449
Mlu_00902.mRNA1	0
Mlu_00903.mRNA1	189
Mlu_00904.mRNA1	0
Mlu_00905.mRNA1	884
Mlu_00906.mRNA1	19
Mlu_00907.mRNA1	4
Mlu_00908.mRNA1	0
Mlu_00909.mRNA1	55
Mlu_00910.mRNA1	0
Mlu_00911.mRNA1	47
Mlu_00912.mRNA1	40
Mlu_00913.mRNA1	122
Mlu_00914.mRNA1	243
Mlu_00915.mRNA1	0
Mlu_00916.mRNA1	222
Mlu_00917.mRNA1	0
Mlu_00918.mRNA1	0
Mlu_00919.mRNA1	2
Mlu_00920.mRNA1	0
Mlu_00921.mRNA1	273
Mlu_00922.mRNA1	765
Mlu_00923.mRNA1	1029
Mlu_00924.mRNA1	183
Mlu_00925.mRNA1	371
Mlu_00926.mRNA1	0
Mlu_00927.mRNA1	442
Mlu_00928.mRNA1	125
Mlu_00929.mRNA1	0
Mlu_00930.mRNA1	0
Mlu_00931.mRNA1	0
Mlu_00932.mRNA1	0
Mlu_00933.mRNA1	0
Mlu_00934.mRNA1	310
Mlu_00935.mRNA1	0
Mlu_00936.mRNA1	4
Mlu_00937.mRNA1	0
Mlu_00938.mRNA1	5
Mlu_00939.mRNA1	5
Mlu_00940.mRNA1	101
Mlu_00941.mRNA1	393
Mlu_00942.mRNA1	563
Mlu_00943.mRNA1	2125
Mlu_00944.mRNA1	287
Mlu_00945.mRNA1	32
Mlu_00946.mRNA1	409
Mlu_00947.mRNA1	210
Mlu_00948.mRNA1	18
Mlu_00949.mRNA1	1546
Mlu_00950.mRNA1	12
Mlu_00951.mRNA1	654
Mlu_00952.mRNA1	3
Mlu_00953.mRNA1	0
Mlu_00954.mRNA1	15
Mlu_00955.mRNA1	4699
Mlu_00956.mRNA1	41
Mlu_00957.mRNA1	8
Mlu_00958.mRNA1	0
Mlu_00959.mRNA1	0
Mlu_00960.mRNA1	130
Mlu_00961.mRNA1	412
Mlu_00962.mRNA1	89
Mlu_00963.mRNA1	374
Mlu_00964.mRNA1	20
Mlu_00965.mRNA1	35
Mlu_00966.mRNA1	828
Mlu_00967.mRNA1	85
Mlu_00968.mRNA1	65
Mlu_00969.mRNA1	86
Mlu_00970.mRNA1	12
Mlu_00971.mRNA1	914
Mlu_00972.mRNA1	191
Mlu_00973.mRNA1	129
Mlu_00974.mRNA1	144
Mlu_00975.mRNA1	19
Mlu_00976.mRNA1	215
Mlu_00977.mRNA1	431
Mlu_00978.mRNA1	479
Mlu_00979.mRNA1	27
Mlu_00980.mRNA1	1
Mlu_00981.mRNA1	0
Mlu_00982.mRNA1	0
Mlu_00983.mRNA1	18
Mlu_00984.mRNA1	12
Mlu_00985.mRNA1	17
Mlu_00986.mRNA1	286
Mlu_00987.mRNA1	24
Mlu_00988.mRNA1	0
Mlu_00989.mRNA1	15
Mlu_00990.mRNA1	7
Mlu_00991.mRNA1	26
Mlu_00992.mRNA1	30
Mlu_00993.mRNA1	3
Mlu_00994.mRNA1	138
Mlu_00995.mRNA1	2257
Mlu_00996.mRNA1	156
Mlu_00997.mRNA1	0
Mlu_00998.mRNA1	88
Mlu_00999.mRNA1	263
Mlu_01000.mRNA1	1
Mlu_01001.mRNA1	0
Mlu_01002.mRNA1	297
Mlu_01003.mRNA1	295
Mlu_01004.mRNA1	1
Mlu_01005.mRNA1	60
Mlu_01006.mRNA1	11053
Mlu_01007.mRNA1	9640
Mlu_01008.mRNA1	352
Mlu_01009.mRNA1	170
Mlu_01010.mRNA1	382
Mlu_01011.mRNA1	1
Mlu_01012.mRNA1	1186
Mlu_01013.mRNA1	368
Mlu_01014.mRNA1	226
Mlu_01015.mRNA1	0
Mlu_01016.mRNA1	4691
Mlu_01017.mRNA1	27
Mlu_01018.mRNA1	523
Mlu_01019.mRNA1	2694
Mlu_01020.mRNA1	194
Mlu_01021.mRNA1	203
Mlu_01022.mRNA1	470
Mlu_01023.mRNA1	602
Mlu_01024.mRNA1	17
Mlu_01025.mRNA1	116
Mlu_01026.mRNA1	100
Mlu_01027.mRNA1	218
Mlu_01028.mRNA1	827
Mlu_01029.mRNA1	227
Mlu_01030.mRNA1	629
Mlu_01031.mRNA1	50
Mlu_01032.mRNA1	1101
Mlu_01033.mRNA1	402
Mlu_01034.mRNA1	91
Mlu_01035.mRNA1	105
Mlu_01036.mRNA1	2925
Mlu_01037.mRNA1	0
Mlu_01038.mRNA1	170
Mlu_01039.mRNA1	0
Mlu_01040.mRNA1	3
Mlu_01041.mRNA1	0
Mlu_01042.mRNA1	0
Mlu_01043.mRNA1	79
Mlu_01044.mRNA1	83
Mlu_01045.mRNA1	72
Mlu_01046.mRNA1	1
Mlu_01047.mRNA1	25
Mlu_01048.mRNA1	0
Mlu_01049.mRNA1	1504
Mlu_01050.mRNA1	525
Mlu_01051.mRNA1	0
Mlu_01052.mRNA1	0
Mlu_01053.mRNA1	349
Mlu_01054.mRNA1	217
Mlu_01055.mRNA1	866
Mlu_01056.mRNA1	2060
Mlu_01057.mRNA1	1521
Mlu_01058.mRNA1	991
Mlu_01059.mRNA1	52
Mlu_01060.mRNA1	114
Mlu_01061.mRNA1	1
Mlu_01062.mRNA1	30
Mlu_01063.mRNA1	3
Mlu_01064.mRNA1	297
Mlu_01065.mRNA1	1
Mlu_01066.mRNA1	0
Mlu_01067.mRNA1	18
Mlu_01068.mRNA1	105
Mlu_01069.mRNA1	37
Mlu_01070.mRNA1	60
Mlu_01071.mRNA1	129
Mlu_01072.mRNA1	287
Mlu_01073.mRNA1	0
Mlu_01074.mRNA1	0
Mlu_01075.mRNA1	231
Mlu_01076.mRNA1	81
Mlu_01077.mRNA1	55
Mlu_01078.mRNA1	12
Mlu_01079.mRNA1	22
Mlu_01080.mRNA1	0
Mlu_01081.mRNA1	0
Mlu_01082.mRNA1	0
Mlu_01083.mRNA1	0
Mlu_01084.mRNA1	0
Mlu_01085.mRNA1	0
Mlu_01086.mRNA1	4
Mlu_01087.mRNA1	0
Mlu_01088.mRNA1	1876
Mlu_01089.mRNA1	2088
Mlu_01090.mRNA1	1557
Mlu_01091.mRNA1	386
Mlu_01092.mRNA1	42
Mlu_01093.mRNA1	196
Mlu_01094.mRNA1	2
Mlu_01095.mRNA1	3438
Mlu_01096.mRNA1	130
Mlu_01097.mRNA1	0
Mlu_01098.mRNA1	2
Mlu_01099.mRNA1	125
Mlu_01100.mRNA1	0
Mlu_01101.mRNA1	354
Mlu_01102.mRNA1	129
Mlu_01103.mRNA1	20
Mlu_01104.mRNA1	4
Mlu_01105.mRNA1	0
Mlu_01106.mRNA1	260
Mlu_01107.mRNA1	0
Mlu_01108.mRNA1	3
Mlu_01109.mRNA1	9
Mlu_01110.mRNA1	165
Mlu_01111.mRNA1	18
Mlu_01112.mRNA1	29
Mlu_01113.mRNA1	1411
Mlu_01114.mRNA1	106
Mlu_01115.mRNA1	408
Mlu_01116.mRNA1	675
Mlu_01117.mRNA1	0
Mlu_01118.mRNA1	0
Mlu_01119.mRNA1	0
Mlu_01120.mRNA1	43
Mlu_01121.mRNA1	105
Mlu_01122.mRNA1	0
Mlu_01123.mRNA1	7
Mlu_01124.mRNA1	121
Mlu_01125.mRNA1	66
Mlu_01126.mRNA1	220
Mlu_01127.mRNA1	0
Mlu_01128.mRNA1	0
Mlu_01129.mRNA1	12
Mlu_01130.mRNA1	0
Mlu_01131.mRNA1	23
Mlu_01132.mRNA1	0
Mlu_01133.mRNA1	11
Mlu_01134.mRNA1	180
Mlu_01135.mRNA1	0
Mlu_01136.mRNA1	48
Mlu_01137.mRNA1	0
Mlu_01138.mRNA1	200
Mlu_01139.mRNA1	36
Mlu_01140.mRNA1	0
Mlu_01141.mRNA1	0
Mlu_01142.mRNA1	1472
Mlu_01143.mRNA1	172
Mlu_01144.mRNA1	4
Mlu_01145.mRNA1	80
Mlu_01146.mRNA1	3
Mlu_01147.mRNA1	28
Mlu_01148.mRNA1	382
Mlu_01149.mRNA1	434
Mlu_01150.mRNA1	1
Mlu_01151.mRNA1	2
Mlu_01152.mRNA1	21
Mlu_01153.mRNA1	81
Mlu_01154.mRNA1	0
Mlu_01155.mRNA1	496
Mlu_01156.mRNA1	49
Mlu_01157.mRNA1	186
Mlu_01158.mRNA1	40
Mlu_01159.mRNA1	44
Mlu_01160.mRNA1	161
Mlu_01161.mRNA1	0
Mlu_01162.mRNA1	0
Mlu_01163.mRNA1	0
Mlu_01164.mRNA1	213
Mlu_01165.mRNA1	10
Mlu_01166.mRNA1	10
Mlu_01167.mRNA1	49
Mlu_01168.mRNA1	70
Mlu_01169.mRNA1	147
Mlu_01170.mRNA1	106
Mlu_01171.mRNA1	572
Mlu_01172.mRNA1	304
Mlu_01173.mRNA1	296
Mlu_01174.mRNA1	0
Mlu_01175.mRNA1	0
Mlu_01176.mRNA1	165
Mlu_01177.mRNA1	0
Mlu_01178.mRNA1	50
Mlu_01179.mRNA1	2
Mlu_01180.mRNA1	0
Mlu_01181.mRNA1	0
Mlu_01182.mRNA1	9
Mlu_01183.mRNA1	0
Mlu_01184.mRNA1	2
Mlu_01185.mRNA1	359
Mlu_01186.mRNA1	61
Mlu_01187.mRNA1	178
Mlu_01188.mRNA1	17
Mlu_01189.mRNA1	367
Mlu_01190.mRNA1	1
Mlu_01191.mRNA1	0
Mlu_01192.mRNA1	50
Mlu_01193.mRNA1	1000
Mlu_01194.mRNA1	371
Mlu_01195.mRNA1	4
Mlu_01196.mRNA1	0
Mlu_01197.mRNA1	100
Mlu_01198.mRNA1	19
Mlu_01199.mRNA1	313
Mlu_01200.mRNA1	85
Mlu_01201.mRNA1	240
Mlu_01202.mRNA1	278
Mlu_01203.mRNA1	10
Mlu_01204.mRNA1	50
Mlu_01205.mRNA1	449
Mlu_01206.mRNA1	13
Mlu_01207.mRNA1	0
Mlu_01208.mRNA1	0
Mlu_01209.mRNA1	41
Mlu_01210.mRNA1	24
Mlu_01211.mRNA1	2718
Mlu_01212.mRNA1	515
Mlu_01213.mRNA1	23
Mlu_01214.mRNA1	105
Mlu_01215.mRNA1	1
Mlu_01216.mRNA1	0
Mlu_01217.mRNA1	0
Mlu_01218.mRNA1	0
Mlu_01219.mRNA1	1
Mlu_01220.mRNA1	0
Mlu_01221.mRNA1	0
Mlu_01222.mRNA1	0
Mlu_01223.mRNA1	3
Mlu_01224.mRNA1	0
Mlu_01225.mRNA1	94
Mlu_01226.mRNA1	129
Mlu_01227.mRNA1	510
Mlu_01228.mRNA1	0
Mlu_01229.mRNA1	0
Mlu_01230.mRNA1	49
Mlu_01231.mRNA1	58
Mlu_01232.mRNA1	271
Mlu_01233.mRNA1	0
Mlu_01234.mRNA1	7
Mlu_01235.mRNA1	0
Mlu_01236.mRNA1	93
Mlu_01237.mRNA1	821
Mlu_01238.mRNA1	49
Mlu_01239.mRNA1	51
Mlu_01240.mRNA1	375
Mlu_01241.mRNA1	313
Mlu_01242.mRNA1	115
Mlu_01243.mRNA1	340
Mlu_01244.mRNA1	341
Mlu_01245.mRNA1	410
Mlu_01246.mRNA1	21
Mlu_01247.mRNA1	767
Mlu_01248.mRNA1	3
Mlu_01249.mRNA1	78
Mlu_01250.mRNA1	152
Mlu_01251.mRNA1	21
Mlu_01252.mRNA1	11
Mlu_01253.mRNA1	178
Mlu_01254.mRNA1	101
Mlu_01255.mRNA1	0
Mlu_01256.mRNA1	27
Mlu_01257.mRNA1	116
Mlu_01258.mRNA1	627
Mlu_01259.mRNA1	240
Mlu_01260.mRNA1	108
Mlu_01261.mRNA1	45
Mlu_01262.mRNA1	130
Mlu_01263.mRNA1	176
Mlu_01264.mRNA1	229
Mlu_01265.mRNA1	34
Mlu_01266.mRNA1	74
Mlu_01267.mRNA1	14
Mlu_01268.mRNA1	279
Mlu_01269.mRNA1	322
Mlu_01270.mRNA1	0
Mlu_01271.mRNA1	3
Mlu_01272.mRNA1	184
Mlu_01273.mRNA1	138
Mlu_01274.mRNA1	0
Mlu_01275.mRNA1	84
Mlu_01276.mRNA1	7
Mlu_01277.mRNA1	182
Mlu_01278.mRNA1	0
Mlu_01279.mRNA1	2
Mlu_01280.mRNA1	0
Mlu_01281.mRNA1	0
Mlu_01282.mRNA1	155
Mlu_01283.mRNA1	351
Mlu_01284.mRNA1	6
Mlu_01285.mRNA1	0
Mlu_01286.mRNA1	4
Mlu_01287.mRNA1	156
Mlu_01288.mRNA1	0
Mlu_01289.mRNA1	211
Mlu_01290.mRNA1	457
Mlu_01291.mRNA1	120
Mlu_01292.mRNA1	1
Mlu_01293.mRNA1	0
Mlu_01294.mRNA1	1
Mlu_01295.mRNA1	0
Mlu_01296.mRNA1	0
Mlu_01297.mRNA1	0
Mlu_01298.mRNA1	406
Mlu_01299.mRNA1	62
Mlu_01300.mRNA1	1
Mlu_01301.mRNA1	0
Mlu_01302.mRNA1	98
Mlu_01303.mRNA1	221
Mlu_01304.mRNA1	0
Mlu_01305.mRNA1	363
Mlu_01306.mRNA1	1002
Mlu_01307.mRNA1	2
Mlu_01308.mRNA1	182
Mlu_01309.mRNA1	336
Mlu_01310.mRNA1	9
Mlu_01311.mRNA1	141
Mlu_01312.mRNA1	687
Mlu_01313.mRNA1	1961
Mlu_01314.mRNA1	10
Mlu_01315.mRNA1	43
Mlu_01316.mRNA1	449
Mlu_01317.mRNA1	267
Mlu_01318.mRNA1	1
Mlu_01319.mRNA1	276
Mlu_01320.mRNA1	2
Mlu_01321.mRNA1	159
Mlu_01322.mRNA1	45
Mlu_01323.mRNA1	0
Mlu_01324.mRNA1	9
Mlu_01325.mRNA1	4
Mlu_01326.mRNA1	13
Mlu_01327.mRNA1	3
Mlu_01328.mRNA1	279
Mlu_01329.mRNA1	19
Mlu_01330.mRNA1	0
Mlu_01331.mRNA1	507
Mlu_01332.mRNA1	851
Mlu_01333.mRNA1	0
Mlu_01334.mRNA1	97
Mlu_01335.mRNA1	26
Mlu_01336.mRNA1	0
Mlu_01337.mRNA1	0
Mlu_01338.mRNA1	633
Mlu_01339.mRNA1	314
Mlu_01340.mRNA1	3
Mlu_01341.mRNA1	23
Mlu_01342.mRNA1	3929
Mlu_01343.mRNA1	0
Mlu_01344.mRNA1	11
Mlu_01345.mRNA1	1023
Mlu_01346.mRNA1	19
Mlu_01347.mRNA1	1
Mlu_01348.mRNA1	388
Mlu_01349.mRNA1	0
Mlu_01350.mRNA1	647
Mlu_01351.mRNA1	5
Mlu_01352.mRNA1	0
Mlu_01353.mRNA1	7215
Mlu_01354.mRNA1	0
Mlu_01355.mRNA1	54
Mlu_01356.mRNA1	10
Mlu_01357.mRNA1	358
Mlu_01358.mRNA1	0
Mlu_01359.mRNA1	0
Mlu_01360.mRNA1	0
Mlu_01361.mRNA1	431
Mlu_01362.mRNA1	0
Mlu_01363.mRNA1	0
Mlu_01364.mRNA1	30
Mlu_01365.mRNA1	144
Mlu_01366.mRNA1	223
Mlu_01367.mRNA1	304
Mlu_01368.mRNA1	1559
Mlu_01369.mRNA1	112
Mlu_01370.mRNA1	61
Mlu_01371.mRNA1	168
Mlu_01372.mRNA1	308
Mlu_01373.mRNA1	192
Mlu_01374.mRNA1	942
Mlu_01375.mRNA1	199
Mlu_01376.mRNA1	90
Mlu_01377.mRNA1	251
Mlu_01378.mRNA1	429
Mlu_01379.mRNA1	210
Mlu_01380.mRNA1	69
Mlu_01381.mRNA1	23
Mlu_01382.mRNA1	7
Mlu_01383.mRNA1	111
Mlu_01384.mRNA1	563
Mlu_01385.mRNA1	8873
Mlu_01386.mRNA1	2
Mlu_01387.mRNA1	15
Mlu_01388.mRNA1	0
Mlu_01389.mRNA1	0
Mlu_01390.mRNA1	0
Mlu_01391.mRNA1	771
Mlu_01392.mRNA1	437
Mlu_01393.mRNA1	81
Mlu_01394.mRNA1	0
Mlu_01395.mRNA1	216
Mlu_01396.mRNA1	414
Mlu_01397.mRNA1	469
Mlu_01398.mRNA1	3
Mlu_01399.mRNA1	384
Mlu_01400.mRNA1	198
Mlu_01401.mRNA1	105
Mlu_01402.mRNA1	0
Mlu_01403.mRNA1	30
Mlu_01404.mRNA1	4
Mlu_01405.mRNA1	0
Mlu_01406.mRNA1	330
Mlu_01407.mRNA1	7
Mlu_01408.mRNA1	1814
Mlu_01409.mRNA1	9
Mlu_01410.mRNA1	284
Mlu_01411.mRNA1	170
Mlu_01412.mRNA1	634
Mlu_01413.mRNA1	4
Mlu_01414.mRNA1	488
Mlu_01415.mRNA1	17
Mlu_01416.mRNA1	689
Mlu_01417.mRNA1	1
Mlu_01418.mRNA1	29
Mlu_01419.mRNA1	94
Mlu_01420.mRNA1	198
Mlu_01421.mRNA1	1
Mlu_01422.mRNA1	0
Mlu_01423.mRNA1	5
Mlu_01424.mRNA1	0
Mlu_01425.mRNA1	405
Mlu_01426.mRNA1	643
Mlu_01427.mRNA1	420
Mlu_01428.mRNA1	248
Mlu_01429.mRNA1	2
Mlu_01430.mRNA1	197
Mlu_01431.mRNA1	48
Mlu_01432.mRNA1	238
Mlu_01433.mRNA1	5511
Mlu_01434.mRNA1	106
Mlu_01435.mRNA1	4
Mlu_01436.mRNA1	3
Mlu_01437.mRNA1	27
Mlu_01438.mRNA1	586
Mlu_01439.mRNA1	121
Mlu_01440.mRNA1	4
Mlu_01441.mRNA1	242
Mlu_01442.mRNA1	280
Mlu_01443.mRNA1	142
Mlu_01444.mRNA1	0
Mlu_01445.mRNA1	0
Mlu_01446.mRNA1	137
Mlu_01447.mRNA1	58
Mlu_01448.mRNA1	2
Mlu_01449.mRNA1	297
Mlu_01450.mRNA1	8044
Mlu_01451.mRNA1	93
Mlu_01452.mRNA1	93
Mlu_01453.mRNA1	1
Mlu_01454.mRNA1	6
Mlu_01455.mRNA1	176
Mlu_01456.mRNA1	225
Mlu_01457.mRNA1	478
Mlu_01458.mRNA1	0
Mlu_01459.mRNA1	1
Mlu_01460.mRNA1	239
Mlu_01461.mRNA1	1207
Mlu_01462.mRNA1	97
Mlu_01463.mRNA1	5
Mlu_01464.mRNA1	31
Mlu_01465.mRNA1	50
Mlu_01466.mRNA1	596
Mlu_01467.mRNA1	11
Mlu_01468.mRNA1	565
Mlu_01469.mRNA1	2
Mlu_01470.mRNA1	313
Mlu_01471.mRNA1	107
Mlu_01472.mRNA1	646
Mlu_01473.mRNA1	24
Mlu_01474.mRNA1	148
Mlu_01475.mRNA1	232
Mlu_01476.mRNA1	32
Mlu_01477.mRNA1	719
Mlu_01478.mRNA1	1296
Mlu_01479.mRNA1	151
Mlu_01480.mRNA1	123
Mlu_01481.mRNA1	580
Mlu_01482.mRNA1	156
Mlu_01483.mRNA1	1376
Mlu_01484.mRNA1	707
Mlu_01485.mRNA1	382
Mlu_01486.mRNA1	539
Mlu_01487.mRNA1	0
Mlu_01488.mRNA1	2
Mlu_01489.mRNA1	288
Mlu_01490.mRNA1	26
Mlu_01491.mRNA1	0
Mlu_01492.mRNA1	14
Mlu_01493.mRNA1	0
Mlu_01494.mRNA1	0
Mlu_01495.mRNA1	0
Mlu_01496.mRNA1	0
Mlu_01497.mRNA1	0
Mlu_01498.mRNA1	112
Mlu_01499.mRNA1	52
Mlu_01500.mRNA1	42
Mlu_01501.mRNA1	10
Mlu_01502.mRNA1	0
Mlu_01503.mRNA1	47
Mlu_01504.mRNA1	11
Mlu_01505.mRNA1	1
Mlu_01506.mRNA1	2609
Mlu_01507.mRNA1	356
Mlu_01508.mRNA1	250
Mlu_01509.mRNA1	0
Mlu_01510.mRNA1	128
Mlu_01511.mRNA1	1
Mlu_01512.mRNA1	401
Mlu_01513.mRNA1	388
Mlu_01514.mRNA1	0
Mlu_01515.mRNA1	376
Mlu_01516.mRNA1	438
Mlu_01517.mRNA1	2051
Mlu_01518.mRNA1	1
Mlu_01519.mRNA1	1
Mlu_01520.mRNA1	33
Mlu_01521.mRNA1	5
Mlu_01522.mRNA1	29
Mlu_01523.mRNA1	540
Mlu_01524.mRNA1	513
Mlu_01525.mRNA1	1
Mlu_01526.mRNA1	103
Mlu_01527.mRNA1	176
Mlu_01528.mRNA1	18
Mlu_01529.mRNA1	98
Mlu_01530.mRNA1	19
Mlu_01531.mRNA1	1098
Mlu_01532.mRNA1	8
Mlu_01533.mRNA1	33
Mlu_01534.mRNA1	264
Mlu_01535.mRNA1	443
Mlu_01536.mRNA1	50
Mlu_01537.mRNA1	1522
Mlu_01538.mRNA1	207
Mlu_01539.mRNA1	9
Mlu_01540.mRNA1	0
Mlu_01541.mRNA1	0
Mlu_01542.mRNA1	0
Mlu_01543.mRNA1	0
Mlu_01544.mRNA1	94
Mlu_01545.mRNA1	248
Mlu_01546.mRNA1	337
Mlu_01547.mRNA1	594
Mlu_01548.mRNA1	0
Mlu_01549.mRNA1	22
Mlu_01550.mRNA1	1224
Mlu_01551.mRNA1	185
Mlu_01552.mRNA1	495
Mlu_01553.mRNA1	0
Mlu_01554.mRNA1	1
Mlu_01555.mRNA1	0
Mlu_01556.mRNA1	0
Mlu_01557.mRNA1	363
Mlu_01558.mRNA1	6
Mlu_01559.mRNA1	906
Mlu_01560.mRNA1	5
Mlu_01561.mRNA1	19
Mlu_01562.mRNA1	1723
Mlu_01563.mRNA1	0
Mlu_01564.mRNA1	22
Mlu_01565.mRNA1	6
Mlu_01566.mRNA1	1125
Mlu_01567.mRNA1	175
Mlu_01568.mRNA1	72
Mlu_01569.mRNA1	93
Mlu_01570.mRNA1	0
Mlu_01571.mRNA1	3
Mlu_01572.mRNA1	225
Mlu_01573.mRNA1	13
Mlu_01574.mRNA1	96
Mlu_01575.mRNA1	839
Mlu_01576.mRNA1	9
Mlu_01577.mRNA1	11
Mlu_01578.mRNA1	53
Mlu_01579.mRNA1	0
Mlu_01580.mRNA1	200
Mlu_01581.mRNA1	628
Mlu_01582.mRNA1	0
Mlu_01583.mRNA1	51
Mlu_01584.mRNA1	184
Mlu_01585.mRNA1	2
Mlu_01586.mRNA1	0
Mlu_01587.mRNA1	3
Mlu_01588.mRNA1	0
Mlu_01589.mRNA1	0
Mlu_01590.mRNA1	0
Mlu_01591.mRNA1	0
Mlu_01592.mRNA1	0
Mlu_01593.mRNA1	244
Mlu_01594.mRNA1	729
Mlu_01595.mRNA1	4
Mlu_01596.mRNA1	96
Mlu_01597.mRNA1	1
Mlu_01598.mRNA1	0
Mlu_01599.mRNA1	162
Mlu_01600.mRNA1	1
Mlu_01601.mRNA1	121
Mlu_01602.mRNA1	214
Mlu_01603.mRNA1	3
Mlu_01604.mRNA1	286
Mlu_01605.mRNA1	552
Mlu_01606.mRNA1	103
Mlu_01607.mRNA1	13
Mlu_01608.mRNA1	873
Mlu_01609.mRNA1	208
Mlu_01610.mRNA1	89
Mlu_01611.mRNA1	0
Mlu_01612.mRNA1	371
Mlu_01613.mRNA1	0
Mlu_01614.mRNA1	1
Mlu_01615.mRNA1	99
Mlu_01616.mRNA1	6
Mlu_01617.mRNA1	1
Mlu_01618.mRNA1	2651
Mlu_01619.mRNA1	291
Mlu_01620.mRNA1	790
Mlu_01621.mRNA1	16
Mlu_01622.mRNA1	0
Mlu_01623.mRNA1	1
Mlu_01624.mRNA1	126
Mlu_01625.mRNA1	6
Mlu_01626.mRNA1	622
Mlu_01627.mRNA1	215
Mlu_01628.mRNA1	44
Mlu_01629.mRNA1	850
Mlu_01630.mRNA1	1
Mlu_01631.mRNA1	0
Mlu_01632.mRNA1	0
Mlu_01633.mRNA1	57
Mlu_01634.mRNA1	72
Mlu_01635.mRNA1	211
Mlu_01636.mRNA1	75
Mlu_01637.mRNA1	0
Mlu_01638.mRNA1	0
Mlu_01639.mRNA1	278
Mlu_01640.mRNA1	753
Mlu_01641.mRNA1	74
Mlu_01642.mRNA1	125
Mlu_01643.mRNA1	4
Mlu_01644.mRNA1	163
Mlu_01645.mRNA1	215
Mlu_01646.mRNA1	299
Mlu_01647.mRNA1	23
Mlu_01648.mRNA1	6
Mlu_01649.mRNA1	71
Mlu_01650.mRNA1	407
Mlu_01651.mRNA1	2
Mlu_01652.mRNA1	0
Mlu_01653.mRNA1	656
Mlu_01654.mRNA1	184
Mlu_01655.mRNA1	445
Mlu_01656.mRNA1	450
Mlu_01657.mRNA1	709
Mlu_01658.mRNA1	2687
Mlu_01659.mRNA1	51
Mlu_01660.mRNA1	75
Mlu_01661.mRNA1	63
Mlu_01662.mRNA1	6
Mlu_01663.mRNA1	1070
Mlu_01664.mRNA1	147
Mlu_01665.mRNA1	140
Mlu_01666.mRNA1	0
Mlu_01667.mRNA1	0
Mlu_01668.mRNA1	141
Mlu_01669.mRNA1	0
Mlu_01670.mRNA1	17
Mlu_01671.mRNA1	250
Mlu_01672.mRNA1	190
Mlu_01673.mRNA1	2185
Mlu_01674.mRNA1	129
Mlu_01675.mRNA1	395
Mlu_01676.mRNA1	1
Mlu_01677.mRNA1	1124
Mlu_01678.mRNA1	2965
Mlu_01679.mRNA1	465
Mlu_01680.mRNA1	1
Mlu_01681.mRNA1	1463
Mlu_01682.mRNA1	336
Mlu_01683.mRNA1	22
Mlu_01684.mRNA1	2
Mlu_01685.mRNA1	61
Mlu_01686.mRNA1	164
Mlu_01687.mRNA1	256
Mlu_01688.mRNA1	17
Mlu_01689.mRNA1	397
Mlu_01690.mRNA1	121
Mlu_01691.mRNA1	221
Mlu_01692.mRNA1	76
Mlu_01693.mRNA1	594
Mlu_01694.mRNA1	53
Mlu_01695.mRNA1	613
Mlu_01696.mRNA1	899
Mlu_01697.mRNA1	51
Mlu_01698.mRNA1	319
Mlu_01699.mRNA1	235
Mlu_01700.mRNA1	20
Mlu_01701.mRNA1	1
Mlu_01702.mRNA1	266
Mlu_01703.mRNA1	104
Mlu_01704.mRNA1	0
Mlu_01705.mRNA1	1
Mlu_01706.mRNA1	122
Mlu_01707.mRNA1	0
Mlu_01708.mRNA1	1
Mlu_01709.mRNA1	18
Mlu_01710.mRNA1	703
Mlu_01711.mRNA1	0
Mlu_01712.mRNA1	155
Mlu_01713.mRNA1	1865
Mlu_01714.mRNA1	520
Mlu_01715.mRNA1	6
Mlu_01716.mRNA1	384
Mlu_01717.mRNA1	36
Mlu_01718.mRNA1	66
Mlu_01719.mRNA1	0
Mlu_01720.mRNA1	5
Mlu_01721.mRNA1	86
Mlu_01722.mRNA1	44
Mlu_01723.mRNA1	6
Mlu_01724.mRNA1	9
Mlu_01725.mRNA1	2
Mlu_01726.mRNA1	126
Mlu_01727.mRNA1	67
Mlu_01728.mRNA1	99
Mlu_01729.mRNA1	59
Mlu_01730.mRNA1	84
Mlu_01731.mRNA1	0
Mlu_01732.mRNA1	0
Mlu_01733.mRNA1	1173
Mlu_01734.mRNA1	1806
Mlu_01735.mRNA1	0
Mlu_01736.mRNA1	25
Mlu_01737.mRNA1	0
Mlu_01738.mRNA1	247
Mlu_01739.mRNA1	0
Mlu_01740.mRNA1	0
Mlu_01741.mRNA1	1
Mlu_01742.mRNA1	0
Mlu_01743.mRNA1	22
Mlu_01744.mRNA1	276
Mlu_01745.mRNA1	223
Mlu_01746.mRNA1	48
Mlu_01747.mRNA1	483
Mlu_01748.mRNA1	1786
Mlu_01749.mRNA1	4
Mlu_01750.mRNA1	32
Mlu_01751.mRNA1	124
Mlu_01752.mRNA1	39
Mlu_01753.mRNA1	0
Mlu_01754.mRNA1	175
Mlu_01755.mRNA1	1
Mlu_01756.mRNA1	1
Mlu_01757.mRNA1	634
Mlu_01758.mRNA1	11
Mlu_01759.mRNA1	291
Mlu_01760.mRNA1	0
Mlu_01761.mRNA1	0
Mlu_01762.mRNA1	2
Mlu_01763.mRNA1	856
Mlu_01764.mRNA1	247
Mlu_01765.mRNA1	0
Mlu_01766.mRNA1	1
Mlu_01767.mRNA1	405
Mlu_01768.mRNA1	144
Mlu_01769.mRNA1	1
Mlu_01770.mRNA1	67
Mlu_01771.mRNA1	45
Mlu_01772.mRNA1	1076
Mlu_01773.mRNA1	0
Mlu_01774.mRNA1	0
Mlu_01775.mRNA1	0
Mlu_01776.mRNA1	41
Mlu_01777.mRNA1	0
Mlu_01778.mRNA1	0
Mlu_01779.mRNA1	0
Mlu_01780.mRNA1	0
Mlu_01781.mRNA1	1
Mlu_01782.mRNA1	4
Mlu_01783.mRNA1	1
Mlu_01784.mRNA1	0
Mlu_01785.mRNA1	35
Mlu_01786.mRNA1	0
Mlu_01787.mRNA1	22
Mlu_01788.mRNA1	1387
Mlu_01789.mRNA1	701
Mlu_01790.mRNA1	0
Mlu_01791.mRNA1	0
Mlu_01792.mRNA1	101
Mlu_01793.mRNA1	607
Mlu_01794.mRNA1	2
Mlu_01795.mRNA1	0
Mlu_01796.mRNA1	13
Mlu_01797.mRNA1	115
Mlu_01798.mRNA1	10
Mlu_01799.mRNA1	191
Mlu_01800.mRNA1	14
Mlu_01801.mRNA1	177
Mlu_01802.mRNA1	360
Mlu_01803.mRNA1	215
Mlu_01804.mRNA1	0
Mlu_01805.mRNA1	129
Mlu_01806.mRNA1	366
Mlu_01807.mRNA1	59
Mlu_01808.mRNA1	4
Mlu_01809.mRNA1	1
Mlu_01810.mRNA1	337
Mlu_01811.mRNA1	349
Mlu_01812.mRNA1	0
Mlu_01813.mRNA1	42
Mlu_01814.mRNA1	1
Mlu_01815.mRNA1	29
Mlu_01816.mRNA1	176
Mlu_01817.mRNA1	0
Mlu_01818.mRNA1	266
Mlu_01819.mRNA1	460
Mlu_01820.mRNA1	71
Mlu_01821.mRNA1	4
Mlu_01822.mRNA1	133
Mlu_01823.mRNA1	81
Mlu_01824.mRNA1	3
Mlu_01825.mRNA1	0
Mlu_01826.mRNA1	275
Mlu_01827.mRNA1	160
Mlu_01828.mRNA1	272
Mlu_01829.mRNA1	0
Mlu_01830.mRNA1	0
Mlu_01831.mRNA1	46
Mlu_01832.mRNA1	0
Mlu_01833.mRNA1	47
Mlu_01834.mRNA1	132
Mlu_01835.mRNA1	27
Mlu_01836.mRNA1	7
Mlu_01837.mRNA1	51
Mlu_01838.mRNA1	317
Mlu_01839.mRNA1	21
Mlu_01840.mRNA1	203
Mlu_01841.mRNA1	1144
Mlu_01842.mRNA1	72
Mlu_01843.mRNA1	4
Mlu_01844.mRNA1	1
Mlu_01845.mRNA1	23
Mlu_01846.mRNA1	1702
Mlu_01847.mRNA1	17
Mlu_01848.mRNA1	2
Mlu_01849.mRNA1	28
Mlu_01850.mRNA1	1996
Mlu_01851.mRNA1	83
Mlu_01852.mRNA1	12
Mlu_01853.mRNA1	533
Mlu_01854.mRNA1	329
Mlu_01855.mRNA1	826
Mlu_01856.mRNA1	19
Mlu_01857.mRNA1	10
Mlu_01858.mRNA1	472
Mlu_01859.mRNA1	3
Mlu_01860.mRNA1	1
Mlu_01861.mRNA1	403
Mlu_01862.mRNA1	113
Mlu_01863.mRNA1	463
Mlu_01864.mRNA1	45
Mlu_01865.mRNA1	26
Mlu_01866.mRNA1	350
Mlu_01867.mRNA1	0
Mlu_01868.mRNA1	0
Mlu_01869.mRNA1	103
Mlu_01870.mRNA1	263
Mlu_01871.mRNA1	188
Mlu_01872.mRNA1	0
Mlu_01873.mRNA1	1
Mlu_01874.mRNA1	1
Mlu_01875.mRNA1	24
Mlu_01876.mRNA1	0
Mlu_01877.mRNA1	0
Mlu_01878.mRNA1	1988
Mlu_01879.mRNA1	95
Mlu_01880.mRNA1	1278
Mlu_01881.mRNA1	405
Mlu_01882.mRNA1	3
Mlu_01883.mRNA1	3
Mlu_01884.mRNA1	40
Mlu_01885.mRNA1	2
Mlu_01886.mRNA1	0
Mlu_01887.mRNA1	24
Mlu_01888.mRNA1	13
Mlu_01889.mRNA1	96
Mlu_01890.mRNA1	0
Mlu_01891.mRNA1	226
Mlu_01892.mRNA1	0
Mlu_01893.mRNA1	1
Mlu_01894.mRNA1	10
Mlu_01895.mRNA1	0
Mlu_01896.mRNA1	89
Mlu_01897.mRNA1	2
Mlu_01898.mRNA1	0
Mlu_01899.mRNA1	336
Mlu_01900.mRNA1	415
Mlu_01901.mRNA1	252
Mlu_01902.mRNA1	74
Mlu_01903.mRNA1	230
Mlu_01904.mRNA1	0
Mlu_01905.mRNA1	4995
Mlu_01906.mRNA1	0
Mlu_01907.mRNA1	285
Mlu_01908.mRNA1	363
Mlu_01909.mRNA1	23
Mlu_01910.mRNA1	0
Mlu_01911.mRNA1	0
Mlu_01912.mRNA1	583
Mlu_01913.mRNA1	4627
Mlu_01914.mRNA1	133
Mlu_01915.mRNA1	301
Mlu_01916.mRNA1	2022
Mlu_01917.mRNA1	231
Mlu_01918.mRNA1	29
Mlu_01919.mRNA1	0
Mlu_01920.mRNA1	190
Mlu_01921.mRNA1	1
Mlu_01922.mRNA1	147
Mlu_01923.mRNA1	1805
Mlu_01924.mRNA1	1213
Mlu_01925.mRNA1	2
Mlu_01926.mRNA1	196
Mlu_01927.mRNA1	3561
Mlu_01928.mRNA1	147
Mlu_01929.mRNA1	10
Mlu_01930.mRNA1	467
Mlu_01931.mRNA1	429
Mlu_01932.mRNA1	75
Mlu_01933.mRNA1	0
Mlu_01934.mRNA1	3
Mlu_01935.mRNA1	0
Mlu_01936.mRNA1	338
Mlu_01937.mRNA1	0
Mlu_01938.mRNA1	271
Mlu_01939.mRNA1	61
Mlu_01940.mRNA1	506
Mlu_01941.mRNA1	308
Mlu_01942.mRNA1	763
Mlu_01943.mRNA1	3
Mlu_01944.mRNA1	121
Mlu_01945.mRNA1	413
Mlu_01946.mRNA1	5
Mlu_01947.mRNA1	0
Mlu_01948.mRNA1	12
Mlu_01949.mRNA1	2
Mlu_01950.mRNA1	84
Mlu_01951.mRNA1	0
Mlu_01952.mRNA1	0
Mlu_01953.mRNA1	7
Mlu_01954.mRNA1	1
Mlu_01955.mRNA1	0
Mlu_01956.mRNA1	537
Mlu_01957.mRNA1	101
Mlu_01958.mRNA1	299
Mlu_01959.mRNA1	0
Mlu_01960.mRNA1	180
Mlu_01961.mRNA1	34
Mlu_01962.mRNA1	0
Mlu_01963.mRNA1	71
Mlu_01964.mRNA1	0
Mlu_01965.mRNA1	0
Mlu_01966.mRNA1	8
Mlu_01967.mRNA1	173
Mlu_01968.mRNA1	0
Mlu_01969.mRNA1	68
Mlu_01970.mRNA1	297
Mlu_01971.mRNA1	9
Mlu_01972.mRNA1	4
Mlu_01973.mRNA1	1
Mlu_01974.mRNA1	150
Mlu_01975.mRNA1	14
Mlu_01976.mRNA1	2221
Mlu_01977.mRNA1	923
Mlu_01978.mRNA1	41
Mlu_01979.mRNA1	35
Mlu_01980.mRNA1	0
Mlu_01981.mRNA1	0
Mlu_01982.mRNA1	161
Mlu_01983.mRNA1	4
Mlu_01984.mRNA1	129
Mlu_01985.mRNA1	1
Mlu_01986.mRNA1	1
Mlu_01987.mRNA1	112
Mlu_01988.mRNA1	0
Mlu_01989.mRNA1	3
Mlu_01990.mRNA1	370
Mlu_01991.mRNA1	1
Mlu_01992.mRNA1	42
Mlu_01993.mRNA1	0
Mlu_01994.mRNA1	229
Mlu_01995.mRNA1	96
Mlu_01996.mRNA1	5
Mlu_01997.mRNA1	66
Mlu_01998.mRNA1	12
Mlu_01999.mRNA1	0
Mlu_02000.mRNA1	26
[truncated: 44,860 more rows]

## Sheet: S5
Mlu_00001.mRNA1	226
Mlu_00002.mRNA1	40
Mlu_00003.mRNA1	0
Mlu_00004.mRNA1	66
Mlu_00005.mRNA1	120
Mlu_00006.mRNA1	91
Mlu_00007.mRNA1	27
Mlu_00008.mRNA1	326
Mlu_00009.mRNA1	352
Mlu_00010.mRNA1	3
Mlu_00011.mRNA1	0
Mlu_00012.mRNA1	97
Mlu_00013.mRNA1	2
Mlu_00014.mRNA1	106
Mlu_00015.mRNA1	1
Mlu_00016.mRNA1	16
Mlu_00017.mRNA1	0
Mlu_00018.mRNA1	7
Mlu_00019.mRNA1	4
Mlu_00020.mRNA1	22
Mlu_00021.mRNA1	9
Mlu_00022.mRNA1	55
Mlu_00023.mRNA1	174
Mlu_00024.mRNA1	0
Mlu_00025.mRNA1	43
Mlu_00026.mRNA1	15
Mlu_00027.mRNA1	140
Mlu_00028.mRNA1	0
Mlu_00029.mRNA1	287
Mlu_00030.mRNA1	204
Mlu_00031.mRNA1	33
Mlu_00032.mRNA1	0
Mlu_00033.mRNA1	56
Mlu_00034.mRNA1	86
Mlu_00035.mRNA1	92
Mlu_00036.mRNA1	314
Mlu_00037.mRNA1	6
Mlu_00038.mRNA1	545
Mlu_00039.mRNA1	17
Mlu_00040.mRNA1	2
Mlu_00041.mRNA1	5
Mlu_00042.mRNA1	0
Mlu_00043.mRNA1	0
Mlu_00044.mRNA1	166
Mlu_00045.mRNA1	185
Mlu_00046.mRNA1	39
Mlu_00047.mRNA1	0
Mlu_00048.mRNA1	57
Mlu_00049.mRNA1	0
Mlu_00050.mRNA1	3193
Mlu_00051.mRNA1	0
Mlu_00052.mRNA1	0
Mlu_00053.mRNA1	0
Mlu_00054.mRNA1	0
Mlu_00055.mRNA1	0
Mlu_00056.mRNA1	0
Mlu_00057.mRNA1	6
Mlu_00058.mRNA1	5
Mlu_00059.mRNA1	61
Mlu_00060.mRNA1	5
Mlu_00061.mRNA1	604
Mlu_00062.mRNA1	0
Mlu_00063.mRNA1	82
Mlu_00064.mRNA1	100
Mlu_00065.mRNA1	646
Mlu_00066.mRNA1	11
Mlu_00067.mRNA1	1804
Mlu_00068.mRNA1	65
Mlu_00069.mRNA1	0
Mlu_00070.mRNA1	21
Mlu_00071.mRNA1	4
Mlu_00072.mRNA1	129
Mlu_00073.mRNA1	108
Mlu_00074.mRNA1	2
Mlu_00075.mRNA1	0
Mlu_00076.mRNA1	0
Mlu_00077.mRNA1	0
Mlu_00078.mRNA1	0
Mlu_00079.mRNA1	146
Mlu_00080.mRNA1	0
Mlu_00081.mRNA1	211
Mlu_00082.mRNA1	0
Mlu_00083.mRNA1	12
Mlu_00084.mRNA1	75
Mlu_00085.mRNA1	1
Mlu_00086.mRNA1	89
Mlu_00087.mRNA1	139
Mlu_00088.mRNA1	452
Mlu_00089.mRNA1	1346
Mlu_00090.mRNA1	0
Mlu_00091.mRNA1	17
Mlu_00092.mRNA1	258
Mlu_00093.mRNA1	279
Mlu_00094.mRNA1	187
Mlu_00095.mRNA1	5
Mlu_00096.mRNA1	16
Mlu_00097.mRNA1	0
Mlu_00098.mRNA1	0
Mlu_00099.mRNA1	0
Mlu_00100.mRNA1	13
Mlu_00101.mRNA1	1
Mlu_00102.mRNA1	149
Mlu_00103.mRNA1	2
Mlu_00104.mRNA1	609
Mlu_00105.mRNA1	25
Mlu_00106.mRNA1	156
Mlu_00107.mRNA1	0
Mlu_00108.mRNA1	591
Mlu_00109.mRNA1	500
Mlu_00110.mRNA1	31
Mlu_00111.mRNA1	361
Mlu_00112.mRNA1	19
Mlu_00113.mRNA1	6
Mlu_00114.mRNA1	186
Mlu_00115.mRNA1	48
Mlu_00116.mRNA1	221
Mlu_00117.mRNA1	36
Mlu_00118.mRNA1	84
Mlu_00119.mRNA1	11
Mlu_00120.mRNA1	218
Mlu_00121.mRNA1	34
Mlu_00122.mRNA1	98
Mlu_00123.mRNA1	128
Mlu_00124.mRNA1	45
Mlu_00125.mRNA1	57
Mlu_00126.mRNA1	65
Mlu_00127.mRNA1	206
Mlu_00128.mRNA1	259
Mlu_00129.mRNA1	923
Mlu_00130.mRNA1	17
Mlu_00131.mRNA1	117
Mlu_00132.mRNA1	234
Mlu_00133.mRNA1	4
Mlu_00134.mRNA1	30
Mlu_00135.mRNA1	1
Mlu_00136.mRNA1	1
Mlu_00137.mRNA1	0
Mlu_00138.mRNA1	11
Mlu_00139.mRNA1	0
Mlu_00140.mRNA1	104
Mlu_00141.mRNA1	36
Mlu_00142.mRNA1	102
Mlu_00143.mRNA1	102
Mlu_00144.mRNA1	102
Mlu_00145.mRNA1	0
Mlu_00146.mRNA1	0
Mlu_00147.mRNA1	17
Mlu_00148.mRNA1	0
Mlu_00149.mRNA1	13
Mlu_00150.mRNA1	80
Mlu_00151.mRNA1	18
Mlu_00152.mRNA1	138
Mlu_00153.mRNA1	0
Mlu_00154.mRNA1	342
Mlu_00155.mRNA1	83
Mlu_00156.mRNA1	2799
Mlu_00157.mRNA1	14
Mlu_00158.mRNA1	0
Mlu_00159.mRNA1	0
Mlu_00160.mRNA1	281
Mlu_00161.mRNA1	5
Mlu_00162.mRNA1	0
Mlu_00163.mRNA1	151
Mlu_00164.mRNA1	490
Mlu_00165.mRNA1	17
Mlu_00166.mRNA1	97
Mlu_00167.mRNA1	0
Mlu_00168.mRNA1	0
Mlu_00169.mRNA1	52
Mlu_00170.mRNA1	77
Mlu_00171.mRNA1	337
Mlu_00172.mRNA1	36
Mlu_00173.mRNA1	25
Mlu_00174.mRNA1	42
Mlu_00175.mRNA1	187
Mlu_00176.mRNA1	57
Mlu_00177.mRNA1	231
Mlu_00178.mRNA1	8
Mlu_00179.mRNA1	162
Mlu_00180.mRNA1	13
Mlu_00181.mRNA1	1
Mlu_00182.mRNA1	1
Mlu_00183.mRNA1	0
Mlu_00184.mRNA1	0
Mlu_00185.mRNA1	0
Mlu_00186.mRNA1	180
Mlu_00187.mRNA1	349
Mlu_00188.mRNA1	1150
Mlu_00189.mRNA1	195
Mlu_00190.mRNA1	101
Mlu_00191.mRNA1	17
Mlu_00192.mRNA1	10
Mlu_00193.mRNA1	3
Mlu_00194.mRNA1	4
Mlu_00195.mRNA1	412
Mlu_00196.mRNA1	205
Mlu_00197.mRNA1	8
Mlu_00198.mRNA1	2
Mlu_00199.mRNA1	0
Mlu_00200.mRNA1	50
Mlu_00201.mRNA1	183
Mlu_00202.mRNA1	46
Mlu_00203.mRNA1	42
Mlu_00204.mRNA1	0
Mlu_00205.mRNA1	23
Mlu_00206.mRNA1	63
Mlu_00207.mRNA1	0
Mlu_00208.mRNA1	203
Mlu_00209.mRNA1	57
Mlu_00210.mRNA1	4
Mlu_00211.mRNA1	9
Mlu_00212.mRNA1	24
Mlu_00213.mRNA1	91
Mlu_00214.mRNA1	1
Mlu_00215.mRNA1	225
Mlu_00216.mRNA1	85
Mlu_00217.mRNA1	45
Mlu_00218.mRNA1	138
Mlu_00219.mRNA1	74
Mlu_00220.mRNA1	54
Mlu_00221.mRNA1	4
Mlu_00222.mRNA1	141
Mlu_00223.mRNA1	33
Mlu_00224.mRNA1	95
Mlu_00225.mRNA1	440
Mlu_00226.mRNA1	21
Mlu_00227.mRNA1	883
Mlu_00228.mRNA1	4
Mlu_00229.mRNA1	36
Mlu_00230.mRNA1	69
Mlu_00231.mRNA1	0
Mlu_00232.mRNA1	0
Mlu_00233.mRNA1	16
Mlu_00234.mRNA1	0
Mlu_00235.mRNA1	92
Mlu_00236.mRNA1	86
Mlu_00237.mRNA1	420
Mlu_00238.mRNA1	183
Mlu_00239.mRNA1	0
Mlu_00240.mRNA1	0
Mlu_00241.mRNA1	136
Mlu_00242.mRNA1	1
Mlu_00243.mRNA1	0
Mlu_00244.mRNA1	1
Mlu_00245.mRNA1	243
Mlu_00246.mRNA1	82
Mlu_00247.mRNA1	641
Mlu_00248.mRNA1	80
Mlu_00249.mRNA1	98
Mlu_00250.mRNA1	55
Mlu_00251.mRNA1	2301
Mlu_00252.mRNA1	504
Mlu_00253.mRNA1	454
Mlu_00254.mRNA1	174
Mlu_00255.mRNA1	1173
Mlu_00256.mRNA1	7
Mlu_00257.mRNA1	1055
Mlu_00258.mRNA1	207
Mlu_00259.mRNA1	0
Mlu_00260.mRNA1	0
Mlu_00261.mRNA1	152
Mlu_00262.mRNA1	1207
Mlu_00263.mRNA1	283
Mlu_00264.mRNA1	8
Mlu_00265.mRNA1	2
Mlu_00266.mRNA1	54
Mlu_00267.mRNA1	1
Mlu_00268.mRNA1	1411
Mlu_00269.mRNA1	1130
Mlu_00270.mRNA1	93
Mlu_00271.mRNA1	1678
Mlu_00272.mRNA1	13
Mlu_00273.mRNA1	1980
Mlu_00274.mRNA1	0
Mlu_00275.mRNA1	8
Mlu_00276.mRNA1	92
Mlu_00277.mRNA1	2
Mlu_00278.mRNA1	21
Mlu_00279.mRNA1	0
Mlu_00280.mRNA1	1
Mlu_00281.mRNA1	1
Mlu_00282.mRNA1	78
Mlu_00283.mRNA1	0
Mlu_00284.mRNA1	413
Mlu_00285.mRNA1	167
Mlu_00286.mRNA1	139
Mlu_00287.mRNA1	94
Mlu_00288.mRNA1	240
Mlu_00289.mRNA1	3
Mlu_00290.mRNA1	0
Mlu_00291.mRNA1	91
Mlu_00292.mRNA1	0
Mlu_00293.mRNA1	208
Mlu_00294.mRNA1	0
Mlu_00295.mRNA1	27
Mlu_00296.mRNA1	555
Mlu_00297.mRNA1	0
Mlu_00298.mRNA1	172
Mlu_00299.mRNA1	1925
Mlu_00300.mRNA1	23
Mlu_00301.mRNA1	88
Mlu_00302.mRNA1	342
Mlu_00303.mRNA1	60
Mlu_00304.mRNA1	485
Mlu_00305.mRNA1	369
Mlu_00306.mRNA1	19
Mlu_00307.mRNA1	0
Mlu_00308.mRNA1	103
Mlu_00309.mRNA1	106
Mlu_00310.mRNA1	1
Mlu_00311.mRNA1	92
Mlu_00312.mRNA1	302
Mlu_00313.mRNA1	0
Mlu_00314.mRNA1	0
Mlu_00315.mRNA1	191
Mlu_00316.mRNA1	0
Mlu_00317.mRNA1	1
Mlu_00318.mRNA1	208
Mlu_00319.mRNA1	0
Mlu_00320.mRNA1	17
Mlu_00321.mRNA1	1
Mlu_00322.mRNA1	109
Mlu_00323.mRNA1	96
Mlu_00324.mRNA1	1400
Mlu_00325.mRNA1	39
Mlu_00326.mRNA1	643
Mlu_00327.mRNA1	181
Mlu_00328.mRNA1	1
Mlu_00329.mRNA1	174
Mlu_00330.mRNA1	0
Mlu_00331.mRNA1	61
Mlu_00332.mRNA1	0
Mlu_00333.mRNA1	0
Mlu_00334.mRNA1	65
Mlu_00335.mRNA1	0
Mlu_00336.mRNA1	69
Mlu_00337.mRNA1	102
Mlu_00338.mRNA1	0
Mlu_00339.mRNA1	2
Mlu_00340.mRNA1	394
Mlu_00341.mRNA1	1736
Mlu_00342.mRNA1	290
Mlu_00343.mRNA1	44
Mlu_00344.mRNA1	127
Mlu_00345.mRNA1	15
Mlu_00346.mRNA1	54
Mlu_00347.mRNA1	2
Mlu_00348.mRNA1	51
Mlu_00349.mRNA1	484
Mlu_00350.mRNA1	3
Mlu_00351.mRNA1	1
Mlu_00352.mRNA1	2
Mlu_00353.mRNA1	279
Mlu_00354.mRNA1	1
Mlu_00355.mRNA1	64
Mlu_00356.mRNA1	0
Mlu_00357.mRNA1	0
Mlu_00358.mRNA1	13
Mlu_00359.mRNA1	131
Mlu_00360.mRNA1	0
Mlu_00361.mRNA1	6
Mlu_00362.mRNA1	607
Mlu_00363.mRNA1	31
Mlu_00364.mRNA1	113
Mlu_00365.mRNA1	62
Mlu_00366.mRNA1	4
Mlu_00367.mRNA1	123
Mlu_00368.mRNA1	409
Mlu_00369.mRNA1	195
Mlu_00370.mRNA1	99
Mlu_00371.mRNA1	0
Mlu_00372.mRNA1	192
Mlu_00373.mRNA1	74
Mlu_00374.mRNA1	9
Mlu_00375.mRNA1	545
Mlu_00376.mRNA1	19
Mlu_00377.mRNA1	94
Mlu_00378.mRNA1	86
Mlu_00379.mRNA1	666
Mlu_00380.mRNA1	98
Mlu_00381.mRNA1	386
Mlu_00382.mRNA1	17
Mlu_00383.mRNA1	55
Mlu_00384.mRNA1	0
Mlu_00385.mRNA1	10
Mlu_00386.mRNA1	10
Mlu_00387.mRNA1	507
Mlu_00388.mRNA1	0
Mlu_00389.mRNA1	65
Mlu_00390.mRNA1	4
Mlu_00391.mRNA1	175
Mlu_00392.mRNA1	45
Mlu_00393.mRNA1	89
Mlu_00394.mRNA1	343
Mlu_00395.mRNA1	134
Mlu_00396.mRNA1	70
Mlu_00397.mRNA1	129
Mlu_00398.mRNA1	65
Mlu_00399.mRNA1	180
Mlu_00400.mRNA1	48
Mlu_00401.mRNA1	79
Mlu_00402.mRNA1	4
Mlu_00403.mRNA1	80
Mlu_00404.mRNA1	5
Mlu_00405.mRNA1	511
Mlu_00406.mRNA1	235
Mlu_00407.mRNA1	10
Mlu_00408.mRNA1	43
Mlu_00409.mRNA1	0
Mlu_00410.mRNA1	62
Mlu_00411.mRNA1	204
Mlu_00412.mRNA1	495
Mlu_00413.mRNA1	0
Mlu_00414.mRNA1	68
Mlu_00415.mRNA1	0
Mlu_00416.mRNA1	110
Mlu_00417.mRNA1	24
Mlu_00418.mRNA1	65
Mlu_00419.mRNA1	331
Mlu_00420.mRNA1	180
Mlu_00421.mRNA1	30
Mlu_00422.mRNA1	2
Mlu_00423.mRNA1	146
Mlu_00424.mRNA1	27
Mlu_00425.mRNA1	0
Mlu_00426.mRNA1	23
Mlu_00427.mRNA1	1
Mlu_00428.mRNA1	5
Mlu_00429.mRNA1	24
Mlu_00430.mRNA1	101
Mlu_00431.mRNA1	0
Mlu_00432.mRNA1	100
Mlu_00433.mRNA1	3
Mlu_00434.mRNA1	36
Mlu_00435.mRNA1	62
Mlu_00436.mRNA1	198
Mlu_00437.mRNA1	35
Mlu_00438.mRNA1	2
Mlu_00439.mRNA1	10
Mlu_00440.mRNA1	242
Mlu_00441.mRNA1	380
Mlu_00442.mRNA1	17
Mlu_00443.mRNA1	29
Mlu_00444.mRNA1	85
Mlu_00445.mRNA1	0
Mlu_00446.mRNA1	0
Mlu_00447.mRNA1	0
Mlu_00448.mRNA1	2990
Mlu_00449.mRNA1	0
Mlu_00450.mRNA1	0
Mlu_00451.mRNA1	708
Mlu_00452.mRNA1	6
Mlu_00453.mRNA1	738
Mlu_00454.mRNA1	114
Mlu_00455.mRNA1	202
Mlu_00456.mRNA1	102
Mlu_00457.mRNA1	0
Mlu_00458.mRNA1	0
Mlu_00459.mRNA1	59
Mlu_00460.mRNA1	8
Mlu_00461.mRNA1	185
Mlu_00462.mRNA1	12
Mlu_00463.mRNA1	127
Mlu_00464.mRNA1	11
Mlu_00465.mRNA1	197
Mlu_00466.mRNA1	0
Mlu_00467.mRNA1	25
Mlu_00468.mRNA1	69
Mlu_00469.mRNA1	100
Mlu_00470.mRNA1	98
Mlu_00471.mRNA1	243
Mlu_00472.mRNA1	17
Mlu_00473.mRNA1	263
Mlu_00474.mRNA1	4
Mlu_00475.mRNA1	85
Mlu_00476.mRNA1	3718
Mlu_00477.mRNA1	38
Mlu_00478.mRNA1	0
Mlu_00479.mRNA1	0
Mlu_00480.mRNA1	303
Mlu_00481.mRNA1	331
Mlu_00482.mRNA1	1894
Mlu_00483.mRNA1	18
Mlu_00484.mRNA1	263
Mlu_00485.mRNA1	0
Mlu_00486.mRNA1	98
Mlu_00487.mRNA1	81
Mlu_00488.mRNA1	1515
Mlu_00489.mRNA1	462
Mlu_00490.mRNA1	91
Mlu_00491.mRNA1	106
Mlu_00492.mRNA1	35
Mlu_00493.mRNA1	878
Mlu_00494.mRNA1	127
Mlu_00495.mRNA1	0
Mlu_00496.mRNA1	0
Mlu_00497.mRNA1	64
Mlu_00498.mRNA1	0
Mlu_00499.mRNA1	33
Mlu_00500.mRNA1	8
Mlu_00501.mRNA1	55
Mlu_00502.mRNA1	5
Mlu_00503.mRNA1	190
Mlu_00504.mRNA1	23
Mlu_00505.mRNA1	1
Mlu_00506.mRNA1	0
Mlu_00507.mRNA1	18
Mlu_00508.mRNA1	0
Mlu_00509.mRNA1	163
Mlu_00510.mRNA1	202
Mlu_00511.mRNA1	31
Mlu_00512.mRNA1	425
Mlu_00513.mRNA1	0
Mlu_00514.mRNA1	422
Mlu_00515.mRNA1	364
Mlu_00516.mRNA1	52
Mlu_00517.mRNA1	0
Mlu_00518.mRNA1	1
Mlu_00519.mRNA1	172
Mlu_00520.mRNA1	14
Mlu_00521.mRNA1	358
Mlu_00522.mRNA1	84
Mlu_00523.mRNA1	21
Mlu_00524.mRNA1	3
Mlu_00525.mRNA1	578
Mlu_00526.mRNA1	1
Mlu_00527.mRNA1	0
Mlu_00528.mRNA1	34
Mlu_00529.mRNA1	58
Mlu_00530.mRNA1	0
Mlu_00531.mRNA1	0
Mlu_00532.mRNA1	4
Mlu_00533.mRNA1	39
Mlu_00534.mRNA1	280
Mlu_00535.mRNA1	25
Mlu_00536.mRNA1	13
Mlu_00537.mRNA1	24
Mlu_00538.mRNA1	865
Mlu_00539.mRNA1	64
Mlu_00540.mRNA1	0
Mlu_00541.mRNA1	7
Mlu_00542.mRNA1	7
Mlu_00543.mRNA1	107
Mlu_00544.mRNA1	452
Mlu_00545.mRNA1	4
Mlu_00546.mRNA1	0
Mlu_00547.mRNA1	5
Mlu_00548.mRNA1	0
Mlu_00549.mRNA1	0
Mlu_00550.mRNA1	31
Mlu_00551.mRNA1	166
Mlu_00552.mRNA1	1516
Mlu_00553.mRNA1	1
Mlu_00554.mRNA1	427
Mlu_00555.mRNA1	11
Mlu_00556.mRNA1	0
Mlu_00557.mRNA1	2
Mlu_00558.mRNA1	20
Mlu_00559.mRNA1	0
Mlu_00560.mRNA1	123
Mlu_00561.mRNA1	131
Mlu_00562.mRNA1	1327
Mlu_00563.mRNA1	16
Mlu_00564.mRNA1	0
Mlu_00565.mRNA1	0
Mlu_00566.mRNA1	16
Mlu_00567.mRNA1	36
Mlu_00568.mRNA1	56
Mlu_00569.mRNA1	46
Mlu_00570.mRNA1	31
Mlu_00571.mRNA1	608
Mlu_00572.mRNA1	79
Mlu_00573.mRNA1	18
Mlu_00574.mRNA1	191
Mlu_00575.mRNA1	66
Mlu_00576.mRNA1	0
Mlu_00577.mRNA1	6
Mlu_00578.mRNA1	354
Mlu_00579.mRNA1	41
Mlu_00580.mRNA1	37
Mlu_00581.mRNA1	224
Mlu_00582.mRNA1	1
Mlu_00583.mRNA1	51
Mlu_00584.mRNA1	132
Mlu_00585.mRNA1	38
Mlu_00586.mRNA1	80
Mlu_00587.mRNA1	553
Mlu_00588.mRNA1	1
Mlu_00589.mRNA1	5
Mlu_00590.mRNA1	11
Mlu_00591.mRNA1	1078
Mlu_00592.mRNA1	2
Mlu_00593.mRNA1	16
Mlu_00594.mRNA1	321
Mlu_00595.mRNA1	14
Mlu_00596.mRNA1	0
Mlu_00597.mRNA1	0
Mlu_00598.mRNA1	10
Mlu_00599.mRNA1	28
Mlu_00600.mRNA1	356
Mlu_00601.mRNA1	2424
Mlu_00602.mRNA1	0
Mlu_00603.mRNA1	343
Mlu_00604.mRNA1	1
Mlu_00605.mRNA1	284
Mlu_00606.mRNA1	50
Mlu_00607.mRNA1	4
Mlu_00608.mRNA1	327
Mlu_00609.mRNA1	14
Mlu_00610.mRNA1	46
Mlu_00611.mRNA1	0
Mlu_00612.mRNA1	13
Mlu_00613.mRNA1	15
Mlu_00614.mRNA1	1170
Mlu_00615.mRNA1	318
Mlu_00616.mRNA1	0
Mlu_00617.mRNA1	140
Mlu_00618.mRNA1	1
Mlu_00619.mRNA1	2
Mlu_00620.mRNA1	514
Mlu_00621.mRNA1	283
Mlu_00622.mRNA1	594
Mlu_00623.mRNA1	14
Mlu_00624.mRNA1	910
Mlu_00625.mRNA1	6
Mlu_00626.mRNA1	2
Mlu_00627.mRNA1	408
Mlu_00628.mRNA1	0
Mlu_00629.mRNA1	0
Mlu_00630.mRNA1	4
Mlu_00631.mRNA1	135
Mlu_00632.mRNA1	42
Mlu_00633.mRNA1	10
Mlu_00634.mRNA1	0
Mlu_00635.mRNA1	251
Mlu_00636.mRNA1	235
Mlu_00637.mRNA1	69
Mlu_00638.mRNA1	255
Mlu_00639.mRNA1	4
Mlu_00640.mRNA1	67
Mlu_00641.mRNA1	1
Mlu_00642.mRNA1	55
Mlu_00643.mRNA1	33
Mlu_00644.mRNA1	145
Mlu_00645.mRNA1	27
Mlu_00646.mRNA1	166
Mlu_00647.mRNA1	162
Mlu_00648.mRNA1	89
Mlu_00649.mRNA1	444
Mlu_00650.mRNA1	106
Mlu_00651.mRNA1	125
Mlu_00652.mRNA1	358
Mlu_00653.mRNA1	71
Mlu_00654.mRNA1	0
Mlu_00655.mRNA1	0
Mlu_00656.mRNA1	40
Mlu_00657.mRNA1	0
Mlu_00658.mRNA1	3
Mlu_00659.mRNA1	2007
Mlu_00660.mRNA1	7
Mlu_00661.mRNA1	33
Mlu_00662.mRNA1	47
Mlu_00663.mRNA1	0
Mlu_00664.mRNA1	8
Mlu_00665.mRNA1	0
Mlu_00666.mRNA1	15
Mlu_00667.mRNA1	38
Mlu_00668.mRNA1	4
Mlu_00669.mRNA1	0
Mlu_00670.mRNA1	1
Mlu_00671.mRNA1	49
Mlu_00672.mRNA1	10
Mlu_00673.mRNA1	0
Mlu_00674.mRNA1	2
Mlu_00675.mRNA1	1
Mlu_00676.mRNA1	118
Mlu_00677.mRNA1	87
Mlu_00678.mRNA1	5
Mlu_00679.mRNA1	195
Mlu_00680.mRNA1	235
Mlu_00681.mRNA1	33
Mlu_00682.mRNA1	183
Mlu_00683.mRNA1	464
Mlu_00684.mRNA1	0
Mlu_00685.mRNA1	6
Mlu_00686.mRNA1	537
Mlu_00687.mRNA1	902
Mlu_00688.mRNA1	73
Mlu_00689.mRNA1	4
Mlu_00690.mRNA1	0
Mlu_00691.mRNA1	0
Mlu_00692.mRNA1	0
Mlu_00693.mRNA1	1
Mlu_00694.mRNA1	107
Mlu_00695.mRNA1	150
Mlu_00696.mRNA1	109
Mlu_00697.mRNA1	0
Mlu_00698.mRNA1	51
Mlu_00699.mRNA1	0
Mlu_00700.mRNA1	39
Mlu_00701.mRNA1	16
Mlu_00702.mRNA1	0
Mlu_00703.mRNA1	9
Mlu_00704.mRNA1	503
Mlu_00705.mRNA1	98
Mlu_00706.mRNA1	426
Mlu_00707.mRNA1	27
Mlu_00708.mRNA1	59
Mlu_00709.mRNA1	95
Mlu_00710.mRNA1	20
Mlu_00711.mRNA1	4
Mlu_00712.mRNA1	13
Mlu_00713.mRNA1	167
Mlu_00714.mRNA1	230
Mlu_00715.mRNA1	1
Mlu_00716.mRNA1	105
Mlu_00717.mRNA1	20
Mlu_00718.mRNA1	54
Mlu_00719.mRNA1	77
Mlu_00720.mRNA1	24
Mlu_00721.mRNA1	130
Mlu_00722.mRNA1	1693
Mlu_00723.mRNA1	4
Mlu_00724.mRNA1	58
Mlu_00725.mRNA1	668
Mlu_00726.mRNA1	0
Mlu_00727.mRNA1	14
Mlu_00728.mRNA1	0
Mlu_00729.mRNA1	0
Mlu_00730.mRNA1	41
Mlu_00731.mRNA1	470
Mlu_00732.mRNA1	9
Mlu_00733.mRNA1	15
Mlu_00734.mRNA1	20
Mlu_00735.mRNA1	0
Mlu_00736.mRNA1	117
Mlu_00737.mRNA1	398
Mlu_00738.mRNA1	148
Mlu_00739.mRNA1	143
Mlu_00740.mRNA1	0
Mlu_00741.mRNA1	0
Mlu_00742.mRNA1	0
Mlu_00743.mRNA1	209
Mlu_00744.mRNA1	29
Mlu_00745.mRNA1	183
Mlu_00746.mRNA1	13
Mlu_00747.mRNA1	32
Mlu_00748.mRNA1	9
Mlu_00749.mRNA1	1
Mlu_00750.mRNA1	0
Mlu_00751.mRNA1	0
Mlu_00752.mRNA1	0
Mlu_00753.mRNA1	673
Mlu_00754.mRNA1	0
Mlu_00755.mRNA1	70
Mlu_00756.mRNA1	62
Mlu_00757.mRNA1	22
Mlu_00758.mRNA1	62
Mlu_00759.mRNA1	39
Mlu_00760.mRNA1	215
Mlu_00761.mRNA1	153
Mlu_00762.mRNA1	0
Mlu_00763.mRNA1	18
Mlu_00764.mRNA1	74
Mlu_00765.mRNA1	1159
Mlu_00766.mRNA1	648
Mlu_00767.mRNA1	135
Mlu_00768.mRNA1	181
Mlu_00769.mRNA1	0
Mlu_00770.mRNA1	527
Mlu_00771.mRNA1	199
Mlu_00772.mRNA1	51
Mlu_00773.mRNA1	3
Mlu_00774.mRNA1	1
Mlu_00775.mRNA1	226
Mlu_00776.mRNA1	0
Mlu_00777.mRNA1	68
Mlu_00778.mRNA1	34
Mlu_00779.mRNA1	305
Mlu_00780.mRNA1	256
Mlu_00781.mRNA1	0
Mlu_00782.mRNA1	0
Mlu_00783.mRNA1	305
Mlu_00784.mRNA1	364
Mlu_00785.mRNA1	0
Mlu_00786.mRNA1	0
Mlu_00787.mRNA1	0
Mlu_00788.mRNA1	3
Mlu_00789.mRNA1	186
Mlu_00790.mRNA1	0
Mlu_00791.mRNA1	0
Mlu_00792.mRNA1	12
Mlu_00793.mRNA1	143
Mlu_00794.mRNA1	0
Mlu_00795.mRNA1	0
Mlu_00796.mRNA1	159
Mlu_00797.mRNA1	0
Mlu_00798.mRNA1	1055
Mlu_00799.mRNA1	33
Mlu_00800.mRNA1	0
Mlu_00801.mRNA1	1
Mlu_00802.mRNA1	76
Mlu_00803.mRNA1	7
Mlu_00804.mRNA1	672
Mlu_00805.mRNA1	164
Mlu_00806.mRNA1	41
Mlu_00807.mRNA1	397
Mlu_00808.mRNA1	113
Mlu_00809.mRNA1	179
Mlu_00810.mRNA1	101
Mlu_00811.mRNA1	102
Mlu_00812.mRNA1	0
Mlu_00813.mRNA1	0
Mlu_00814.mRNA1	581
Mlu_00815.mRNA1	270
Mlu_00816.mRNA1	7
Mlu_00817.mRNA1	369
Mlu_00818.mRNA1	1002
Mlu_00819.mRNA1	28
Mlu_00820.mRNA1	3
Mlu_00821.mRNA1	54
Mlu_00822.mRNA1	24
Mlu_00823.mRNA1	73
Mlu_00824.mRNA1	96
Mlu_00825.mRNA1	23
Mlu_00826.mRNA1	531
Mlu_00827.mRNA1	64
Mlu_00828.mRNA1	483
Mlu_00829.mRNA1	467
Mlu_00830.mRNA1	1
Mlu_00831.mRNA1	31
Mlu_00832.mRNA1	26
Mlu_00833.mRNA1	459
Mlu_00834.mRNA1	133
Mlu_00835.mRNA1	89
Mlu_00836.mRNA1	15
Mlu_00837.mRNA1	1
Mlu_00838.mRNA1	142
Mlu_00839.mRNA1	0
Mlu_00840.mRNA1	9
Mlu_00841.mRNA1	48
Mlu_00842.mRNA1	257
Mlu_00843.mRNA1	0
Mlu_00844.mRNA1	0
Mlu_00845.mRNA1	8
Mlu_00846.mRNA1	13
Mlu_00847.mRNA1	272
Mlu_00848.mRNA1	0
Mlu_00849.mRNA1	0
Mlu_00850.mRNA1	34
Mlu_00851.mRNA1	1
Mlu_00852.mRNA1	3
Mlu_00853.mRNA1	0
Mlu_00854.mRNA1	19
Mlu_00855.mRNA1	15
Mlu_00856.mRNA1	49
Mlu_00857.mRNA1	11
Mlu_00858.mRNA1	59
Mlu_00859.mRNA1	8
Mlu_00860.mRNA1	154
Mlu_00861.mRNA1	96
Mlu_00862.mRNA1	12
Mlu_00863.mRNA1	0
Mlu_00864.mRNA1	69
Mlu_00865.mRNA1	94
Mlu_00866.mRNA1	19
Mlu_00867.mRNA1	490
Mlu_00868.mRNA1	98
Mlu_00869.mRNA1	124
Mlu_00870.mRNA1	0
Mlu_00871.mRNA1	32
Mlu_00872.mRNA1	0
Mlu_00873.mRNA1	665
Mlu_00874.mRNA1	1
Mlu_00875.mRNA1	121
Mlu_00876.mRNA1	0
Mlu_00877.mRNA1	99
Mlu_00878.mRNA1	629
Mlu_00879.mRNA1	853
Mlu_00880.mRNA1	27
Mlu_00881.mRNA1	64
Mlu_00882.mRNA1	28
Mlu_00883.mRNA1	222
Mlu_00884.mRNA1	47
Mlu_00885.mRNA1	118
Mlu_00886.mRNA1	383
Mlu_00887.mRNA1	24
Mlu_00888.mRNA1	13
Mlu_00889.mRNA1	36
Mlu_00890.mRNA1	0
Mlu_00891.mRNA1	45
Mlu_00892.mRNA1	92
Mlu_00893.mRNA1	99
Mlu_00894.mRNA1	204
Mlu_00895.mRNA1	119
Mlu_00896.mRNA1	0
Mlu_00897.mRNA1	65
Mlu_00898.mRNA1	0
Mlu_00899.mRNA1	46
Mlu_00900.mRNA1	9
Mlu_00901.mRNA1	198
Mlu_00902.mRNA1	0
Mlu_00903.mRNA1	114
Mlu_00904.mRNA1	1
Mlu_00905.mRNA1	301
Mlu_00906.mRNA1	5
Mlu_00907.mRNA1	0
Mlu_00908.mRNA1	0
Mlu_00909.mRNA1	2
Mlu_00910.mRNA1	0
Mlu_00911.mRNA1	11
Mlu_00912.mRNA1	20
Mlu_00913.mRNA1	63
Mlu_00914.mRNA1	101
Mlu_00915.mRNA1	0
Mlu_00916.mRNA1	66
Mlu_00917.mRNA1	2
Mlu_00918.mRNA1	0
Mlu_00919.mRNA1	3
Mlu_00920.mRNA1	0
Mlu_00921.mRNA1	26
Mlu_00922.mRNA1	599
Mlu_00923.mRNA1	545
Mlu_00924.mRNA1	98
Mlu_00925.mRNA1	177
Mlu_00926.mRNA1	0
Mlu_00927.mRNA1	183
Mlu_00928.mRNA1	76
Mlu_00929.mRNA1	0
Mlu_00930.mRNA1	0
Mlu_00931.mRNA1	0
Mlu_00932.mRNA1	0
Mlu_00933.mRNA1	0
Mlu_00934.mRNA1	71
Mlu_00935.mRNA1	0
Mlu_00936.mRNA1	2
Mlu_00937.mRNA1	0
Mlu_00938.mRNA1	1
Mlu_00939.mRNA1	2
Mlu_00940.mRNA1	48
Mlu_00941.mRNA1	256
Mlu_00942.mRNA1	248
Mlu_00943.mRNA1	1068
Mlu_00944.mRNA1	141
Mlu_00945.mRNA1	16
Mlu_00946.mRNA1	184
Mlu_00947.mRNA1	244
Mlu_00948.mRNA1	16
Mlu_00949.mRNA1	827
Mlu_00950.mRNA1	3
Mlu_00951.mRNA1	217
Mlu_00952.mRNA1	2
Mlu_00953.mRNA1	2
Mlu_00954.mRNA1	5
Mlu_00955.mRNA1	1534
Mlu_00956.mRNA1	26
Mlu_00957.mRNA1	2
Mlu_00958.mRNA1	0
Mlu_00959.mRNA1	0
Mlu_00960.mRNA1	39
Mlu_00961.mRNA1	223
Mlu_00962.mRNA1	46
Mlu_00963.mRNA1	179
Mlu_00964.mRNA1	10
Mlu_00965.mRNA1	70
Mlu_00966.mRNA1	404
Mlu_00967.mRNA1	34
Mlu_00968.mRNA1	48
Mlu_00969.mRNA1	31
Mlu_00970.mRNA1	15
Mlu_00971.mRNA1	523
Mlu_00972.mRNA1	107
Mlu_00973.mRNA1	79
Mlu_00974.mRNA1	32
Mlu_00975.mRNA1	3
Mlu_00976.mRNA1	74
Mlu_00977.mRNA1	213
Mlu_00978.mRNA1	250
Mlu_00979.mRNA1	11
Mlu_00980.mRNA1	1
Mlu_00981.mRNA1	0
Mlu_00982.mRNA1	0
Mlu_00983.mRNA1	5
Mlu_00984.mRNA1	21
Mlu_00985.mRNA1	8
Mlu_00986.mRNA1	147
Mlu_00987.mRNA1	40
Mlu_00988.mRNA1	0
Mlu_00989.mRNA1	2
Mlu_00990.mRNA1	0
Mlu_00991.mRNA1	8
Mlu_00992.mRNA1	5
Mlu_00993.mRNA1	1
Mlu_00994.mRNA1	46
Mlu_00995.mRNA1	1252
Mlu_00996.mRNA1	78
Mlu_00997.mRNA1	1
Mlu_00998.mRNA1	43
Mlu_00999.mRNA1	152
Mlu_01000.mRNA1	0
Mlu_01001.mRNA1	0
Mlu_01002.mRNA1	150
Mlu_01003.mRNA1	173
Mlu_01004.mRNA1	0
Mlu_01005.mRNA1	6
Mlu_01006.mRNA1	9315
Mlu_01007.mRNA1	9224
Mlu_01008.mRNA1	157
Mlu_01009.mRNA1	56
Mlu_01010.mRNA1	141
Mlu_01011.mRNA1	1
Mlu_01012.mRNA1	81
Mlu_01013.mRNA1	147
Mlu_01014.mRNA1	159
Mlu_01015.mRNA1	0
Mlu_01016.mRNA1	1509
Mlu_01017.mRNA1	14
Mlu_01018.mRNA1	289
Mlu_01019.mRNA1	1179
Mlu_01020.mRNA1	92
Mlu_01021.mRNA1	135
Mlu_01022.mRNA1	210
Mlu_01023.mRNA1	250
Mlu_01024.mRNA1	10
Mlu_01025.mRNA1	37
Mlu_01026.mRNA1	58
Mlu_01027.mRNA1	107
Mlu_01028.mRNA1	343
Mlu_01029.mRNA1	99
Mlu_01030.mRNA1	261
Mlu_01031.mRNA1	28
Mlu_01032.mRNA1	407
Mlu_01033.mRNA1	247
Mlu_01034.mRNA1	70
Mlu_01035.mRNA1	66
Mlu_01036.mRNA1	1392
Mlu_01037.mRNA1	0
Mlu_01038.mRNA1	113
Mlu_01039.mRNA1	0
Mlu_01040.mRNA1	1
Mlu_01041.mRNA1	1
Mlu_01042.mRNA1	0
Mlu_01043.mRNA1	18
Mlu_01044.mRNA1	24
Mlu_01045.mRNA1	22
Mlu_01046.mRNA1	1
Mlu_01047.mRNA1	21
Mlu_01048.mRNA1	0
Mlu_01049.mRNA1	800
Mlu_01050.mRNA1	188
Mlu_01051.mRNA1	0
Mlu_01052.mRNA1	0
Mlu_01053.mRNA1	174
Mlu_01054.mRNA1	34
Mlu_01055.mRNA1	425
Mlu_01056.mRNA1	1269
Mlu_01057.mRNA1	587
Mlu_01058.mRNA1	558
Mlu_01059.mRNA1	23
Mlu_01060.mRNA1	62
Mlu_01061.mRNA1	0
Mlu_01062.mRNA1	19
Mlu_01063.mRNA1	0
Mlu_01064.mRNA1	173
Mlu_01065.mRNA1	0
Mlu_01066.mRNA1	0
Mlu_01067.mRNA1	5
Mlu_01068.mRNA1	67
Mlu_01069.mRNA1	17
Mlu_01070.mRNA1	27
Mlu_01071.mRNA1	71
Mlu_01072.mRNA1	125
Mlu_01073.mRNA1	0
Mlu_01074.mRNA1	0
Mlu_01075.mRNA1	119
Mlu_01076.mRNA1	44
Mlu_01077.mRNA1	16
Mlu_01078.mRNA1	5
Mlu_01079.mRNA1	8
Mlu_01080.mRNA1	0
Mlu_01081.mRNA1	0
Mlu_01082.mRNA1	0
Mlu_01083.mRNA1	0
Mlu_01084.mRNA1	0
Mlu_01085.mRNA1	0
Mlu_01086.mRNA1	3
Mlu_01087.mRNA1	0
Mlu_01088.mRNA1	1291
Mlu_01089.mRNA1	1530
Mlu_01090.mRNA1	816
Mlu_01091.mRNA1	273
Mlu_01092.mRNA1	18
Mlu_01093.mRNA1	121
Mlu_01094.mRNA1	0
Mlu_01095.mRNA1	1325
Mlu_01096.mRNA1	70
Mlu_01097.mRNA1	0
Mlu_01098.mRNA1	0
Mlu_01099.mRNA1	90
Mlu_01100.mRNA1	0
Mlu_01101.mRNA1	167
Mlu_01102.mRNA1	54
Mlu_01103.mRNA1	11
Mlu_01104.mRNA1	1
Mlu_01105.mRNA1	0
Mlu_01106.mRNA1	65
Mlu_01107.mRNA1	0
Mlu_01108.mRNA1	0
Mlu_01109.mRNA1	0
Mlu_01110.mRNA1	94
Mlu_01111.mRNA1	5
Mlu_01112.mRNA1	22
Mlu_01113.mRNA1	659
Mlu_01114.mRNA1	18
Mlu_01115.mRNA1	90
Mlu_01116.mRNA1	268
Mlu_01117.mRNA1	0
Mlu_01118.mRNA1	0
Mlu_01119.mRNA1	0
Mlu_01120.mRNA1	15
Mlu_01121.mRNA1	32
Mlu_01122.mRNA1	0
Mlu_01123.mRNA1	2
Mlu_01124.mRNA1	57
Mlu_01125.mRNA1	44
Mlu_01126.mRNA1	7
Mlu_01127.mRNA1	0
Mlu_01128.mRNA1	0
Mlu_01129.mRNA1	3
Mlu_01130.mRNA1	0
Mlu_01131.mRNA1	8
Mlu_01132.mRNA1	0
Mlu_01133.mRNA1	8
Mlu_01134.mRNA1	140
Mlu_01135.mRNA1	0
Mlu_01136.mRNA1	27
Mlu_01137.mRNA1	0
Mlu_01138.mRNA1	118
Mlu_01139.mRNA1	27
Mlu_01140.mRNA1	0
Mlu_01141.mRNA1	2
Mlu_01142.mRNA1	719
Mlu_01143.mRNA1	128
Mlu_01144.mRNA1	5
Mlu_01145.mRNA1	34
Mlu_01146.mRNA1	0
Mlu_01147.mRNA1	22
Mlu_01148.mRNA1	154
Mlu_01149.mRNA1	140
Mlu_01150.mRNA1	0
Mlu_01151.mRNA1	1
Mlu_01152.mRNA1	7
Mlu_01153.mRNA1	56
Mlu_01154.mRNA1	0
Mlu_01155.mRNA1	268
Mlu_01156.mRNA1	34
Mlu_01157.mRNA1	89
Mlu_01158.mRNA1	8
Mlu_01159.mRNA1	32
Mlu_01160.mRNA1	221
Mlu_01161.mRNA1	0
Mlu_01162.mRNA1	0
Mlu_01163.mRNA1	0
Mlu_01164.mRNA1	157
Mlu_01165.mRNA1	14
Mlu_01166.mRNA1	7
Mlu_01167.mRNA1	13
Mlu_01168.mRNA1	25
Mlu_01169.mRNA1	106
Mlu_01170.mRNA1	60
Mlu_01171.mRNA1	402
Mlu_01172.mRNA1	95
Mlu_01173.mRNA1	173
Mlu_01174.mRNA1	1
Mlu_01175.mRNA1	0
Mlu_01176.mRNA1	53
Mlu_01177.mRNA1	0
Mlu_01178.mRNA1	36
Mlu_01179.mRNA1	2
Mlu_01180.mRNA1	0
Mlu_01181.mRNA1	0
Mlu_01182.mRNA1	0
Mlu_01183.mRNA1	0
Mlu_01184.mRNA1	0
Mlu_01185.mRNA1	167
Mlu_01186.mRNA1	26
Mlu_01187.mRNA1	98
Mlu_01188.mRNA1	8
Mlu_01189.mRNA1	218
Mlu_01190.mRNA1	1
Mlu_01191.mRNA1	0
Mlu_01192.mRNA1	35
Mlu_01193.mRNA1	559
Mlu_01194.mRNA1	180
Mlu_01195.mRNA1	3
Mlu_01196.mRNA1	0
Mlu_01197.mRNA1	54
Mlu_01198.mRNA1	7
Mlu_01199.mRNA1	176
Mlu_01200.mRNA1	65
Mlu_01201.mRNA1	240
Mlu_01202.mRNA1	150
Mlu_01203.mRNA1	5
Mlu_01204.mRNA1	52
Mlu_01205.mRNA1	78
Mlu_01206.mRNA1	23
Mlu_01207.mRNA1	0
Mlu_01208.mRNA1	0
Mlu_01209.mRNA1	19
Mlu_01210.mRNA1	10
Mlu_01211.mRNA1	961
Mlu_01212.mRNA1	303
Mlu_01213.mRNA1	8
Mlu_01214.mRNA1	63
Mlu_01215.mRNA1	0
Mlu_01216.mRNA1	0
Mlu_01217.mRNA1	0
Mlu_01218.mRNA1	0
Mlu_01219.mRNA1	1
Mlu_01220.mRNA1	0
Mlu_01221.mRNA1	0
Mlu_01222.mRNA1	0
Mlu_01223.mRNA1	1
Mlu_01224.mRNA1	0
Mlu_01225.mRNA1	57
Mlu_01226.mRNA1	62
Mlu_01227.mRNA1	190
Mlu_01228.mRNA1	0
Mlu_01229.mRNA1	0
Mlu_01230.mRNA1	14
Mlu_01231.mRNA1	14
Mlu_01232.mRNA1	129
Mlu_01233.mRNA1	0
Mlu_01234.mRNA1	4
Mlu_01235.mRNA1	0
Mlu_01236.mRNA1	80
Mlu_01237.mRNA1	507
Mlu_01238.mRNA1	34
Mlu_01239.mRNA1	18
Mlu_01240.mRNA1	192
Mlu_01241.mRNA1	145
Mlu_01242.mRNA1	62
Mlu_01243.mRNA1	225
Mlu_01244.mRNA1	150
Mlu_01245.mRNA1	214
Mlu_01246.mRNA1	8
Mlu_01247.mRNA1	312
Mlu_01248.mRNA1	0
Mlu_01249.mRNA1	65
Mlu_01250.mRNA1	68
Mlu_01251.mRNA1	15
Mlu_01252.mRNA1	7
Mlu_01253.mRNA1	120
Mlu_01254.mRNA1	42
Mlu_01255.mRNA1	0
Mlu_01256.mRNA1	6
Mlu_01257.mRNA1	43
Mlu_01258.mRNA1	374
Mlu_01259.mRNA1	126
Mlu_01260.mRNA1	72
Mlu_01261.mRNA1	34
Mlu_01262.mRNA1	72
Mlu_01263.mRNA1	69
Mlu_01264.mRNA1	91
Mlu_01265.mRNA1	10
Mlu_01266.mRNA1	26
Mlu_01267.mRNA1	4
Mlu_01268.mRNA1	104
Mlu_01269.mRNA1	154
Mlu_01270.mRNA1	0
Mlu_01271.mRNA1	0
Mlu_01272.mRNA1	52
Mlu_01273.mRNA1	72
Mlu_01274.mRNA1	2
Mlu_01275.mRNA1	45
Mlu_01276.mRNA1	20
Mlu_01277.mRNA1	85
Mlu_01278.mRNA1	0
Mlu_01279.mRNA1	0
Mlu_01280.mRNA1	0
Mlu_01281.mRNA1	0
Mlu_01282.mRNA1	65
Mlu_01283.mRNA1	193
Mlu_01284.mRNA1	4
Mlu_01285.mRNA1	0
Mlu_01286.mRNA1	16
Mlu_01287.mRNA1	74
Mlu_01288.mRNA1	0
Mlu_01289.mRNA1	49
Mlu_01290.mRNA1	250
Mlu_01291.mRNA1	58
Mlu_01292.mRNA1	0
Mlu_01293.mRNA1	0
Mlu_01294.mRNA1	0
Mlu_01295.mRNA1	0
Mlu_01296.mRNA1	0
Mlu_01297.mRNA1	0
Mlu_01298.mRNA1	152
Mlu_01299.mRNA1	34
Mlu_01300.mRNA1	0
Mlu_01301.mRNA1	0
Mlu_01302.mRNA1	56
Mlu_01303.mRNA1	80
Mlu_01304.mRNA1	0
Mlu_01305.mRNA1	166
Mlu_01306.mRNA1	477
Mlu_01307.mRNA1	0
Mlu_01308.mRNA1	84
Mlu_01309.mRNA1	211
Mlu_01310.mRNA1	2
Mlu_01311.mRNA1	67
Mlu_01312.mRNA1	286
Mlu_01313.mRNA1	940
Mlu_01314.mRNA1	3
Mlu_01315.mRNA1	21
Mlu_01316.mRNA1	261
Mlu_01317.mRNA1	110
Mlu_01318.mRNA1	2
Mlu_01319.mRNA1	181
Mlu_01320.mRNA1	1
Mlu_01321.mRNA1	90
Mlu_01322.mRNA1	20
Mlu_01323.mRNA1	0
Mlu_01324.mRNA1	4
Mlu_01325.mRNA1	1
Mlu_01326.mRNA1	12
Mlu_01327.mRNA1	1
Mlu_01328.mRNA1	183
Mlu_01329.mRNA1	11
Mlu_01330.mRNA1	0
Mlu_01331.mRNA1	319
Mlu_01332.mRNA1	518
Mlu_01333.mRNA1	0
Mlu_01334.mRNA1	52
Mlu_01335.mRNA1	67
Mlu_01336.mRNA1	0
Mlu_01337.mRNA1	0
Mlu_01338.mRNA1	354
Mlu_01339.mRNA1	113
Mlu_01340.mRNA1	1
Mlu_01341.mRNA1	12
Mlu_01342.mRNA1	1273
Mlu_01343.mRNA1	0
Mlu_01344.mRNA1	5
Mlu_01345.mRNA1	650
Mlu_01346.mRNA1	6
Mlu_01347.mRNA1	0
Mlu_01348.mRNA1	149
Mlu_01349.mRNA1	0
Mlu_01350.mRNA1	427
Mlu_01351.mRNA1	2
Mlu_01352.mRNA1	0
Mlu_01353.mRNA1	2883
Mlu_01354.mRNA1	0
Mlu_01355.mRNA1	21
Mlu_01356.mRNA1	6
Mlu_01357.mRNA1	178
Mlu_01358.mRNA1	0
Mlu_01359.mRNA1	0
Mlu_01360.mRNA1	0
Mlu_01361.mRNA1	160
Mlu_01362.mRNA1	0
Mlu_01363.mRNA1	0
Mlu_01364.mRNA1	15
Mlu_01365.mRNA1	110
Mlu_01366.mRNA1	85
Mlu_01367.mRNA1	127
Mlu_01368.mRNA1	606
Mlu_01369.mRNA1	85
Mlu_01370.mRNA1	39
Mlu_01371.mRNA1	75
Mlu_01372.mRNA1	134
Mlu_01373.mRNA1	127
Mlu_01374.mRNA1	386
Mlu_01375.mRNA1	94
Mlu_01376.mRNA1	32
Mlu_01377.mRNA1	119
Mlu_01378.mRNA1	236
Mlu_01379.mRNA1	88
Mlu_01380.mRNA1	54
Mlu_01381.mRNA1	23
Mlu_01382.mRNA1	2
Mlu_01383.mRNA1	70
Mlu_01384.mRNA1	290
Mlu_01385.mRNA1	4204
Mlu_01386.mRNA1	0
Mlu_01387.mRNA1	4
Mlu_01388.mRNA1	0
Mlu_01389.mRNA1	0
Mlu_01390.mRNA1	1
Mlu_01391.mRNA1	348
Mlu_01392.mRNA1	266
Mlu_01393.mRNA1	19
Mlu_01394.mRNA1	0
Mlu_01395.mRNA1	164
Mlu_01396.mRNA1	306
Mlu_01397.mRNA1	170
Mlu_01398.mRNA1	3
Mlu_01399.mRNA1	240
Mlu_01400.mRNA1	130
Mlu_01401.mRNA1	43
Mlu_01402.mRNA1	0
Mlu_01403.mRNA1	5
Mlu_01404.mRNA1	4
Mlu_01405.mRNA1	0
Mlu_01406.mRNA1	127
Mlu_01407.mRNA1	6
Mlu_01408.mRNA1	1300
Mlu_01409.mRNA1	4
Mlu_01410.mRNA1	166
Mlu_01411.mRNA1	90
Mlu_01412.mRNA1	286
Mlu_01413.mRNA1	1
Mlu_01414.mRNA1	349
Mlu_01415.mRNA1	3
Mlu_01416.mRNA1	846
Mlu_01417.mRNA1	7
Mlu_01418.mRNA1	63
Mlu_01419.mRNA1	41
Mlu_01420.mRNA1	67
Mlu_01421.mRNA1	5
Mlu_01422.mRNA1	0
Mlu_01423.mRNA1	1
Mlu_01424.mRNA1	0
Mlu_01425.mRNA1	153
Mlu_01426.mRNA1	490
Mlu_01427.mRNA1	138
Mlu_01428.mRNA1	139
Mlu_01429.mRNA1	3
Mlu_01430.mRNA1	94
Mlu_01431.mRNA1	35
Mlu_01432.mRNA1	114
Mlu_01433.mRNA1	2871
Mlu_01434.mRNA1	30
Mlu_01435.mRNA1	0
Mlu_01436.mRNA1	4
Mlu_01437.mRNA1	13
Mlu_01438.mRNA1	197
Mlu_01439.mRNA1	39
Mlu_01440.mRNA1	5
Mlu_01441.mRNA1	118
Mlu_01442.mRNA1	143
Mlu_01443.mRNA1	68
Mlu_01444.mRNA1	0
Mlu_01445.mRNA1	0
Mlu_01446.mRNA1	73
Mlu_01447.mRNA1	35
Mlu_01448.mRNA1	0
Mlu_01449.mRNA1	138
Mlu_01450.mRNA1	3751
Mlu_01451.mRNA1	42
Mlu_01452.mRNA1	58
Mlu_01453.mRNA1	0
Mlu_01454.mRNA1	0
Mlu_01455.mRNA1	209
Mlu_01456.mRNA1	116
Mlu_01457.mRNA1	155
Mlu_01458.mRNA1	0
Mlu_01459.mRNA1	0
Mlu_01460.mRNA1	97
Mlu_01461.mRNA1	595
Mlu_01462.mRNA1	46
Mlu_01463.mRNA1	2
Mlu_01464.mRNA1	30
Mlu_01465.mRNA1	29
Mlu_01466.mRNA1	213
Mlu_01467.mRNA1	4
Mlu_01468.mRNA1	115
Mlu_01469.mRNA1	4
Mlu_01470.mRNA1	132
Mlu_01471.mRNA1	59
Mlu_01472.mRNA1	310
Mlu_01473.mRNA1	26
Mlu_01474.mRNA1	111
Mlu_01475.mRNA1	52
Mlu_01476.mRNA1	16
Mlu_01477.mRNA1	428
Mlu_01478.mRNA1	310
Mlu_01479.mRNA1	86
Mlu_01480.mRNA1	42
Mlu_01481.mRNA1	308
Mlu_01482.mRNA1	132
Mlu_01483.mRNA1	949
Mlu_01484.mRNA1	497
Mlu_01485.mRNA1	214
Mlu_01486.mRNA1	475
Mlu_01487.mRNA1	0
Mlu_01488.mRNA1	0
Mlu_01489.mRNA1	113
Mlu_01490.mRNA1	10
Mlu_01491.mRNA1	0
Mlu_01492.mRNA1	11
Mlu_01493.mRNA1	0
Mlu_01494.mRNA1	0
Mlu_01495.mRNA1	0
Mlu_01496.mRNA1	0
Mlu_01497.mRNA1	0
Mlu_01498.mRNA1	70
Mlu_01499.mRNA1	204
Mlu_01500.mRNA1	14
Mlu_01501.mRNA1	4
Mlu_01502.mRNA1	0
Mlu_01503.mRNA1	26
Mlu_01504.mRNA1	9
Mlu_01505.mRNA1	0
Mlu_01506.mRNA1	967
Mlu_01507.mRNA1	184
Mlu_01508.mRNA1	111
Mlu_01509.mRNA1	0
Mlu_01510.mRNA1	115
Mlu_01511.mRNA1	0
Mlu_01512.mRNA1	162
Mlu_01513.mRNA1	218
Mlu_01514.mRNA1	0
Mlu_01515.mRNA1	127
Mlu_01516.mRNA1	161
Mlu_01517.mRNA1	1239
Mlu_01518.mRNA1	0
Mlu_01519.mRNA1	0
Mlu_01520.mRNA1	12
Mlu_01521.mRNA1	5
Mlu_01522.mRNA1	17
Mlu_01523.mRNA1	271
Mlu_01524.mRNA1	239
Mlu_01525.mRNA1	1
Mlu_01526.mRNA1	43
Mlu_01527.mRNA1	54
Mlu_01528.mRNA1	14
Mlu_01529.mRNA1	78
Mlu_01530.mRNA1	4
Mlu_01531.mRNA1	521
Mlu_01532.mRNA1	9
Mlu_01533.mRNA1	29
Mlu_01534.mRNA1	92
Mlu_01535.mRNA1	293
Mlu_01536.mRNA1	16
Mlu_01537.mRNA1	1075
Mlu_01538.mRNA1	121
Mlu_01539.mRNA1	7
Mlu_01540.mRNA1	0
Mlu_01541.mRNA1	0
Mlu_01542.mRNA1	1
Mlu_01543.mRNA1	0
Mlu_01544.mRNA1	28
Mlu_01545.mRNA1	88
Mlu_01546.mRNA1	180
Mlu_01547.mRNA1	333
Mlu_01548.mRNA1	0
Mlu_01549.mRNA1	28
Mlu_01550.mRNA1	1078
Mlu_01551.mRNA1	99
Mlu_01552.mRNA1	247
Mlu_01553.mRNA1	0
Mlu_01554.mRNA1	0
Mlu_01555.mRNA1	0
Mlu_01556.mRNA1	0
Mlu_01557.mRNA1	247
Mlu_01558.mRNA1	0
Mlu_01559.mRNA1	609
Mlu_01560.mRNA1	0
Mlu_01561.mRNA1	11
Mlu_01562.mRNA1	1137
Mlu_01563.mRNA1	0
Mlu_01564.mRNA1	11
Mlu_01565.mRNA1	6
Mlu_01566.mRNA1	568
Mlu_01567.mRNA1	72
Mlu_01568.mRNA1	48
Mlu_01569.mRNA1	63
Mlu_01570.mRNA1	0
Mlu_01571.mRNA1	0
Mlu_01572.mRNA1	101
Mlu_01573.mRNA1	4
Mlu_01574.mRNA1	13
Mlu_01575.mRNA1	397
Mlu_01576.mRNA1	2
Mlu_01577.mRNA1	0
Mlu_01578.mRNA1	31
Mlu_01579.mRNA1	3
Mlu_01580.mRNA1	113
Mlu_01581.mRNA1	399
Mlu_01582.mRNA1	0
Mlu_01583.mRNA1	46
Mlu_01584.mRNA1	80
Mlu_01585.mRNA1	1
Mlu_01586.mRNA1	0
Mlu_01587.mRNA1	5
Mlu_01588.mRNA1	1
Mlu_01589.mRNA1	0
Mlu_01590.mRNA1	0
Mlu_01591.mRNA1	0
Mlu_01592.mRNA1	0
Mlu_01593.mRNA1	106
Mlu_01594.mRNA1	315
Mlu_01595.mRNA1	0
Mlu_01596.mRNA1	30
Mlu_01597.mRNA1	1
Mlu_01598.mRNA1	0
Mlu_01599.mRNA1	67
Mlu_01600.mRNA1	0
Mlu_01601.mRNA1	65
Mlu_01602.mRNA1	88
Mlu_01603.mRNA1	6
Mlu_01604.mRNA1	105
Mlu_01605.mRNA1	146
Mlu_01606.mRNA1	46
Mlu_01607.mRNA1	30
Mlu_01608.mRNA1	429
Mlu_01609.mRNA1	67
Mlu_01610.mRNA1	66
Mlu_01611.mRNA1	0
Mlu_01612.mRNA1	289
Mlu_01613.mRNA1	0
Mlu_01614.mRNA1	0
Mlu_01615.mRNA1	81
Mlu_01616.mRNA1	4
Mlu_01617.mRNA1	0
Mlu_01618.mRNA1	1083
Mlu_01619.mRNA1	136
Mlu_01620.mRNA1	473
Mlu_01621.mRNA1	4
Mlu_01622.mRNA1	0
Mlu_01623.mRNA1	0
Mlu_01624.mRNA1	74
Mlu_01625.mRNA1	0
Mlu_01626.mRNA1	230
Mlu_01627.mRNA1	92
Mlu_01628.mRNA1	2
Mlu_01629.mRNA1	432
Mlu_01630.mRNA1	1
Mlu_01631.mRNA1	0
Mlu_01632.mRNA1	0
Mlu_01633.mRNA1	17
Mlu_01634.mRNA1	49
Mlu_01635.mRNA1	96
Mlu_01636.mRNA1	21
Mlu_01637.mRNA1	0
Mlu_01638.mRNA1	0
Mlu_01639.mRNA1	149
Mlu_01640.mRNA1	417
Mlu_01641.mRNA1	30
Mlu_01642.mRNA1	18
Mlu_01643.mRNA1	2
Mlu_01644.mRNA1	123
Mlu_01645.mRNA1	121
Mlu_01646.mRNA1	147
Mlu_01647.mRNA1	4
Mlu_01648.mRNA1	5
Mlu_01649.mRNA1	26
Mlu_01650.mRNA1	182
Mlu_01651.mRNA1	0
Mlu_01652.mRNA1	0
Mlu_01653.mRNA1	366
Mlu_01654.mRNA1	16
Mlu_01655.mRNA1	11
Mlu_01656.mRNA1	192
Mlu_01657.mRNA1	377
Mlu_01658.mRNA1	1370
Mlu_01659.mRNA1	49
Mlu_01660.mRNA1	45
Mlu_01661.mRNA1	22
Mlu_01662.mRNA1	1
Mlu_01663.mRNA1	524
Mlu_01664.mRNA1	70
Mlu_01665.mRNA1	70
Mlu_01666.mRNA1	0
Mlu_01667.mRNA1	0
Mlu_01668.mRNA1	64
Mlu_01669.mRNA1	0
Mlu_01670.mRNA1	3
Mlu_01671.mRNA1	154
Mlu_01672.mRNA1	184
Mlu_01673.mRNA1	1409
Mlu_01674.mRNA1	97
Mlu_01675.mRNA1	177
Mlu_01676.mRNA1	1
Mlu_01677.mRNA1	481
Mlu_01678.mRNA1	1294
Mlu_01679.mRNA1	259
Mlu_01680.mRNA1	0
Mlu_01681.mRNA1	704
Mlu_01682.mRNA1	173
Mlu_01683.mRNA1	19
Mlu_01684.mRNA1	2
Mlu_01685.mRNA1	30
Mlu_01686.mRNA1	89
Mlu_01687.mRNA1	122
Mlu_01688.mRNA1	7
Mlu_01689.mRNA1	200
Mlu_01690.mRNA1	56
Mlu_01691.mRNA1	152
Mlu_01692.mRNA1	41
Mlu_01693.mRNA1	1423
Mlu_01694.mRNA1	44
Mlu_01695.mRNA1	728
Mlu_01696.mRNA1	697
Mlu_01697.mRNA1	20
Mlu_01698.mRNA1	124
Mlu_01699.mRNA1	133
Mlu_01700.mRNA1	17
Mlu_01701.mRNA1	0
Mlu_01702.mRNA1	131
Mlu_01703.mRNA1	52
Mlu_01704.mRNA1	0
Mlu_01705.mRNA1	0
Mlu_01706.mRNA1	46
Mlu_01707.mRNA1	0
Mlu_01708.mRNA1	2
Mlu_01709.mRNA1	7
Mlu_01710.mRNA1	336
Mlu_01711.mRNA1	0
Mlu_01712.mRNA1	33
Mlu_01713.mRNA1	1608
Mlu_01714.mRNA1	202
Mlu_01715.mRNA1	4
Mlu_01716.mRNA1	368
Mlu_01717.mRNA1	6
Mlu_01718.mRNA1	27
Mlu_01719.mRNA1	0
Mlu_01720.mRNA1	1
Mlu_01721.mRNA1	54
Mlu_01722.mRNA1	20
Mlu_01723.mRNA1	3
Mlu_01724.mRNA1	7
Mlu_01725.mRNA1	3
Mlu_01726.mRNA1	84
Mlu_01727.mRNA1	32
Mlu_01728.mRNA1	27
Mlu_01729.mRNA1	17
Mlu_01730.mRNA1	24
Mlu_01731.mRNA1	0
Mlu_01732.mRNA1	0
Mlu_01733.mRNA1	263
Mlu_01734.mRNA1	839
Mlu_01735.mRNA1	0
Mlu_01736.mRNA1	16
Mlu_01737.mRNA1	0
Mlu_01738.mRNA1	105
Mlu_01739.mRNA1	0
Mlu_01740.mRNA1	0
Mlu_01741.mRNA1	1
Mlu_01742.mRNA1	1
Mlu_01743.mRNA1	11
Mlu_01744.mRNA1	149
Mlu_01745.mRNA1	111
Mlu_01746.mRNA1	41
Mlu_01747.mRNA1	214
Mlu_01748.mRNA1	812
Mlu_01749.mRNA1	11
Mlu_01750.mRNA1	13
Mlu_01751.mRNA1	64
Mlu_01752.mRNA1	37
Mlu_01753.mRNA1	0
Mlu_01754.mRNA1	166
Mlu_01755.mRNA1	2
Mlu_01756.mRNA1	0
Mlu_01757.mRNA1	370
Mlu_01758.mRNA1	20
Mlu_01759.mRNA1	158
Mlu_01760.mRNA1	0
Mlu_01761.mRNA1	2
Mlu_01762.mRNA1	1
Mlu_01763.mRNA1	649
Mlu_01764.mRNA1	66
Mlu_01765.mRNA1	1
Mlu_01766.mRNA1	0
Mlu_01767.mRNA1	198
Mlu_01768.mRNA1	69
Mlu_01769.mRNA1	0
Mlu_01770.mRNA1	7
Mlu_01771.mRNA1	24
Mlu_01772.mRNA1	617
Mlu_01773.mRNA1	0
Mlu_01774.mRNA1	0
Mlu_01775.mRNA1	2
Mlu_01776.mRNA1	17
Mlu_01777.mRNA1	0
Mlu_01778.mRNA1	0
Mlu_01779.mRNA1	0
Mlu_01780.mRNA1	1
Mlu_01781.mRNA1	0
Mlu_01782.mRNA1	0
Mlu_01783.mRNA1	0
Mlu_01784.mRNA1	0
Mlu_01785.mRNA1	10
Mlu_01786.mRNA1	0
Mlu_01787.mRNA1	24
Mlu_01788.mRNA1	639
Mlu_01789.mRNA1	609
Mlu_01790.mRNA1	0
Mlu_01791.mRNA1	0
Mlu_01792.mRNA1	84
Mlu_01793.mRNA1	244
Mlu_01794.mRNA1	0
Mlu_01795.mRNA1	0
Mlu_01796.mRNA1	32
Mlu_01797.mRNA1	64
Mlu_01798.mRNA1	5
Mlu_01799.mRNA1	92
Mlu_01800.mRNA1	0
Mlu_01801.mRNA1	106
Mlu_01802.mRNA1	304
Mlu_01803.mRNA1	102
Mlu_01804.mRNA1	0
Mlu_01805.mRNA1	73
Mlu_01806.mRNA1	156
Mlu_01807.mRNA1	30
Mlu_01808.mRNA1	2
Mlu_01809.mRNA1	0
Mlu_01810.mRNA1	221
Mlu_01811.mRNA1	184
Mlu_01812.mRNA1	0
Mlu_01813.mRNA1	31
Mlu_01814.mRNA1	0
Mlu_01815.mRNA1	11
Mlu_01816.mRNA1	94
Mlu_01817.mRNA1	1
Mlu_01818.mRNA1	126
Mlu_01819.mRNA1	241
Mlu_01820.mRNA1	53
Mlu_01821.mRNA1	4
Mlu_01822.mRNA1	48
Mlu_01823.mRNA1	33
Mlu_01824.mRNA1	3
Mlu_01825.mRNA1	0
Mlu_01826.mRNA1	101
Mlu_01827.mRNA1	96
Mlu_01828.mRNA1	262
Mlu_01829.mRNA1	1
Mlu_01830.mRNA1	0
Mlu_01831.mRNA1	0
Mlu_01832.mRNA1	0
Mlu_01833.mRNA1	26
Mlu_01834.mRNA1	71
Mlu_01835.mRNA1	18
Mlu_01836.mRNA1	9
Mlu_01837.mRNA1	30
Mlu_01838.mRNA1	116
Mlu_01839.mRNA1	19
Mlu_01840.mRNA1	70
Mlu_01841.mRNA1	454
Mlu_01842.mRNA1	47
Mlu_01843.mRNA1	2
Mlu_01844.mRNA1	0
Mlu_01845.mRNA1	17
Mlu_01846.mRNA1	725
Mlu_01847.mRNA1	12
Mlu_01848.mRNA1	5
Mlu_01849.mRNA1	20
Mlu_01850.mRNA1	1026
Mlu_01851.mRNA1	43
Mlu_01852.mRNA1	2
Mlu_01853.mRNA1	227
Mlu_01854.mRNA1	253
Mlu_01855.mRNA1	460
Mlu_01856.mRNA1	11
Mlu_01857.mRNA1	1
Mlu_01858.mRNA1	126
Mlu_01859.mRNA1	0
Mlu_01860.mRNA1	0
Mlu_01861.mRNA1	163
Mlu_01862.mRNA1	74
Mlu_01863.mRNA1	270
Mlu_01864.mRNA1	37
Mlu_01865.mRNA1	5
Mlu_01866.mRNA1	175
Mlu_01867.mRNA1	0
Mlu_01868.mRNA1	0
Mlu_01869.mRNA1	50
Mlu_01870.mRNA1	145
Mlu_01871.mRNA1	50
Mlu_01872.mRNA1	0
Mlu_01873.mRNA1	0
Mlu_01874.mRNA1	0
Mlu_01875.mRNA1	17
Mlu_01876.mRNA1	1
Mlu_01877.mRNA1	0
Mlu_01878.mRNA1	1222
Mlu_01879.mRNA1	34
Mlu_01880.mRNA1	869
Mlu_01881.mRNA1	273
Mlu_01882.mRNA1	2
Mlu_01883.mRNA1	2
Mlu_01884.mRNA1	16
Mlu_01885.mRNA1	3
Mlu_01886.mRNA1	0
Mlu_01887.mRNA1	11
Mlu_01888.mRNA1	11
Mlu_01889.mRNA1	218
Mlu_01890.mRNA1	0
Mlu_01891.mRNA1	127
Mlu_01892.mRNA1	0
Mlu_01893.mRNA1	0
Mlu_01894.mRNA1	4
Mlu_01895.mRNA1	0
Mlu_01896.mRNA1	87
Mlu_01897.mRNA1	4
Mlu_01898.mRNA1	0
Mlu_01899.mRNA1	223
Mlu_01900.mRNA1	182
Mlu_01901.mRNA1	79
Mlu_01902.mRNA1	41
Mlu_01903.mRNA1	99
Mlu_01904.mRNA1	0
Mlu_01905.mRNA1	422
Mlu_01906.mRNA1	0
Mlu_01907.mRNA1	48
Mlu_01908.mRNA1	39
Mlu_01909.mRNA1	14
Mlu_01910.mRNA1	0
Mlu_01911.mRNA1	3
Mlu_01912.mRNA1	271
Mlu_01913.mRNA1	2880
Mlu_01914.mRNA1	70
Mlu_01915.mRNA1	147
Mlu_01916.mRNA1	1132
Mlu_01917.mRNA1	107
Mlu_01918.mRNA1	21
Mlu_01919.mRNA1	0
Mlu_01920.mRNA1	90
Mlu_01921.mRNA1	0
Mlu_01922.mRNA1	94
Mlu_01923.mRNA1	700
Mlu_01924.mRNA1	413
Mlu_01925.mRNA1	1
Mlu_01926.mRNA1	132
Mlu_01927.mRNA1	1572
Mlu_01928.mRNA1	44
Mlu_01929.mRNA1	4
Mlu_01930.mRNA1	182
Mlu_01931.mRNA1	142
Mlu_01932.mRNA1	24
Mlu_01933.mRNA1	0
Mlu_01934.mRNA1	0
Mlu_01935.mRNA1	1
Mlu_01936.mRNA1	240
Mlu_01937.mRNA1	0
Mlu_01938.mRNA1	174
Mlu_01939.mRNA1	52
Mlu_01940.mRNA1	209
Mlu_01941.mRNA1	162
Mlu_01942.mRNA1	495
Mlu_01943.mRNA1	0
Mlu_01944.mRNA1	53
Mlu_01945.mRNA1	176
Mlu_01946.mRNA1	1
Mlu_01947.mRNA1	0
Mlu_01948.mRNA1	12
Mlu_01949.mRNA1	1
Mlu_01950.mRNA1	22
Mlu_01951.mRNA1	0
Mlu_01952.mRNA1	0
Mlu_01953.mRNA1	7
Mlu_01954.mRNA1	0
Mlu_01955.mRNA1	0
Mlu_01956.mRNA1	205
Mlu_01957.mRNA1	51
Mlu_01958.mRNA1	131
Mlu_01959.mRNA1	0
Mlu_01960.mRNA1	43
Mlu_01961.mRNA1	8
Mlu_01962.mRNA1	0
Mlu_01963.mRNA1	35
Mlu_01964.mRNA1	0
Mlu_01965.mRNA1	0
Mlu_01966.mRNA1	4
Mlu_01967.mRNA1	130
Mlu_01968.mRNA1	0
Mlu_01969.mRNA1	39
Mlu_01970.mRNA1	187
Mlu_01971.mRNA1	2
Mlu_01972.mRNA1	0
Mlu_01973.mRNA1	0
Mlu_01974.mRNA1	129
Mlu_01975.mRNA1	11
Mlu_01976.mRNA1	1770
Mlu_01977.mRNA1	444
Mlu_01978.mRNA1	24
Mlu_01979.mRNA1	21
Mlu_01980.mRNA1	2
Mlu_01981.mRNA1	0
Mlu_01982.mRNA1	142
Mlu_01983.mRNA1	5
Mlu_01984.mRNA1	48
Mlu_01985.mRNA1	0
Mlu_01986.mRNA1	0
Mlu_01987.mRNA1	103
Mlu_01988.mRNA1	0
Mlu_01989.mRNA1	1
Mlu_01990.mRNA1	150
Mlu_01991.mRNA1	0
Mlu_01992.mRNA1	33
Mlu_01993.mRNA1	0
Mlu_01994.mRNA1	145
Mlu_01995.mRNA1	223
Mlu_01996.mRNA1	3
Mlu_01997.mRNA1	39
Mlu_01998.mRNA1	5
Mlu_01999.mRNA1	0
Mlu_02000.mRNA1	19
[truncated: 44,860 more rows]

## Sheet: S6
Mlu_00001.mRNA1	345
Mlu_00002.mRNA1	127
Mlu_00003.mRNA1	0
Mlu_00004.mRNA1	174
Mlu_00005.mRNA1	244
Mlu_00006.mRNA1	160
Mlu_00007.mRNA1	59
Mlu_00008.mRNA1	564
Mlu_00009.mRNA1	611
Mlu_00010.mRNA1	7
Mlu_00011.mRNA1	0
Mlu_00012.mRNA1	184
Mlu_00013.mRNA1	2
Mlu_00014.mRNA1	143
Mlu_00015.mRNA1	3
Mlu_00016.mRNA1	42
Mlu_00017.mRNA1	0
Mlu_00018.mRNA1	16
Mlu_00019.mRNA1	1
Mlu_00020.mRNA1	74
Mlu_00021.mRNA1	16
Mlu_00022.mRNA1	125
Mlu_00023.mRNA1	348
Mlu_00024.mRNA1	0
Mlu_00025.mRNA1	84
Mlu_00026.mRNA1	61
Mlu_00027.mRNA1	339
Mlu_00028.mRNA1	1
Mlu_00029.mRNA1	433
Mlu_00030.mRNA1	464
Mlu_00031.mRNA1	71
Mlu_00032.mRNA1	0
Mlu_00033.mRNA1	151
Mlu_00034.mRNA1	281
Mlu_00035.mRNA1	229
Mlu_00036.mRNA1	697
Mlu_00037.mRNA1	15
Mlu_00038.mRNA1	1155
Mlu_00039.mRNA1	55
Mlu_00040.mRNA1	4
Mlu_00041.mRNA1	5
Mlu_00042.mRNA1	0
Mlu_00043.mRNA1	0
Mlu_00044.mRNA1	279
Mlu_00045.mRNA1	362
Mlu_00046.mRNA1	27
Mlu_00047.mRNA1	0
Mlu_00048.mRNA1	130
Mlu_00049.mRNA1	0
Mlu_00050.mRNA1	4956
Mlu_00051.mRNA1	0
Mlu_00052.mRNA1	2
Mlu_00053.mRNA1	0
Mlu_00054.mRNA1	0
Mlu_00055.mRNA1	0
Mlu_00056.mRNA1	0
Mlu_00057.mRNA1	2
Mlu_00058.mRNA1	23
Mlu_00059.mRNA1	181
Mlu_00060.mRNA1	5
Mlu_00061.mRNA1	1486
Mlu_00062.mRNA1	0
Mlu_00063.mRNA1	148
Mlu_00064.mRNA1	266
Mlu_00065.mRNA1	1377
Mlu_00066.mRNA1	13
Mlu_00067.mRNA1	4066
Mlu_00068.mRNA1	94
Mlu_00069.mRNA1	0
Mlu_00070.mRNA1	20
Mlu_00071.mRNA1	2
Mlu_00072.mRNA1	235
Mlu_00073.mRNA1	257
Mlu_00074.mRNA1	4
Mlu_00075.mRNA1	0
Mlu_00076.mRNA1	0
Mlu_00077.mRNA1	5
Mlu_00078.mRNA1	0
Mlu_00079.mRNA1	435
Mlu_00080.mRNA1	3
Mlu_00081.mRNA1	225
Mlu_00082.mRNA1	0
Mlu_00083.mRNA1	16
Mlu_00084.mRNA1	181
Mlu_00085.mRNA1	15
Mlu_00086.mRNA1	307
Mlu_00087.mRNA1	234
Mlu_00088.mRNA1	987
Mlu_00089.mRNA1	2163
Mlu_00090.mRNA1	3
Mlu_00091.mRNA1	5
Mlu_00092.mRNA1	401
Mlu_00093.mRNA1	441
Mlu_00094.mRNA1	431
Mlu_00095.mRNA1	4
Mlu_00096.mRNA1	41
Mlu_00097.mRNA1	0
Mlu_00098.mRNA1	0
Mlu_00099.mRNA1	0
Mlu_00100.mRNA1	11
Mlu_00101.mRNA1	5
Mlu_00102.mRNA1	332
Mlu_00103.mRNA1	6
Mlu_00104.mRNA1	1178
Mlu_00105.mRNA1	37
Mlu_00106.mRNA1	254
Mlu_00107.mRNA1	6
Mlu_00108.mRNA1	1027
Mlu_00109.mRNA1	1055
Mlu_00110.mRNA1	68
Mlu_00111.mRNA1	756
Mlu_00112.mRNA1	39
Mlu_00113.mRNA1	15
Mlu_00114.mRNA1	374
Mlu_00115.mRNA1	104
Mlu_00116.mRNA1	524
Mlu_00117.mRNA1	87
Mlu_00118.mRNA1	184
Mlu_00119.mRNA1	15
Mlu_00120.mRNA1	423
Mlu_00121.mRNA1	54
Mlu_00122.mRNA1	145
Mlu_00123.mRNA1	362
Mlu_00124.mRNA1	86
Mlu_00125.mRNA1	94
Mlu_00126.mRNA1	81
Mlu_00127.mRNA1	455
Mlu_00128.mRNA1	724
Mlu_00129.mRNA1	1917
Mlu_00130.mRNA1	41
Mlu_00131.mRNA1	251
Mlu_00132.mRNA1	434
Mlu_00133.mRNA1	13
Mlu_00134.mRNA1	74
Mlu_00135.mRNA1	3
Mlu_00136.mRNA1	0
Mlu_00137.mRNA1	0
Mlu_00138.mRNA1	32
Mlu_00139.mRNA1	0
Mlu_00140.mRNA1	229
Mlu_00141.mRNA1	35
Mlu_00142.mRNA1	160
Mlu_00143.mRNA1	144
Mlu_00144.mRNA1	259
Mlu_00145.mRNA1	0
Mlu_00146.mRNA1	0
Mlu_00147.mRNA1	43
Mlu_00148.mRNA1	0
Mlu_00149.mRNA1	24
Mlu_00150.mRNA1	170
Mlu_00151.mRNA1	25
Mlu_00152.mRNA1	236
Mlu_00153.mRNA1	0
Mlu_00154.mRNA1	591
Mlu_00155.mRNA1	173
Mlu_00156.mRNA1	7873
Mlu_00157.mRNA1	34
Mlu_00158.mRNA1	0
Mlu_00159.mRNA1	0
Mlu_00160.mRNA1	627
Mlu_00161.mRNA1	9
Mlu_00162.mRNA1	0
Mlu_00163.mRNA1	358
Mlu_00164.mRNA1	988
Mlu_00165.mRNA1	47
Mlu_00166.mRNA1	161
Mlu_00167.mRNA1	0
Mlu_00168.mRNA1	3
Mlu_00169.mRNA1	131
Mlu_00170.mRNA1	162
Mlu_00171.mRNA1	417
Mlu_00172.mRNA1	71
Mlu_00173.mRNA1	72
Mlu_00174.mRNA1	71
Mlu_00175.mRNA1	343
Mlu_00176.mRNA1	145
Mlu_00177.mRNA1	504
Mlu_00178.mRNA1	3
Mlu_00179.mRNA1	317
Mlu_00180.mRNA1	35
Mlu_00181.mRNA1	3
Mlu_00182.mRNA1	2
Mlu_00183.mRNA1	0
Mlu_00184.mRNA1	0
Mlu_00185.mRNA1	0
Mlu_00186.mRNA1	431
Mlu_00187.mRNA1	949
Mlu_00188.mRNA1	2039
Mlu_00189.mRNA1	441
Mlu_00190.mRNA1	166
Mlu_00191.mRNA1	17
Mlu_00192.mRNA1	11
Mlu_00193.mRNA1	6
Mlu_00194.mRNA1	5
Mlu_00195.mRNA1	863
Mlu_00196.mRNA1	446
Mlu_00197.mRNA1	15
Mlu_00198.mRNA1	1
Mlu_00199.mRNA1	0
Mlu_00200.mRNA1	128
Mlu_00201.mRNA1	305
Mlu_00202.mRNA1	86
Mlu_00203.mRNA1	47
Mlu_00204.mRNA1	0
Mlu_00205.mRNA1	19
Mlu_00206.mRNA1	82
Mlu_00207.mRNA1	0
Mlu_00208.mRNA1	406
Mlu_00209.mRNA1	121
Mlu_00210.mRNA1	21
Mlu_00211.mRNA1	5
Mlu_00212.mRNA1	20
Mlu_00213.mRNA1	233
Mlu_00214.mRNA1	1
Mlu_00215.mRNA1	637
Mlu_00216.mRNA1	159
Mlu_00217.mRNA1	145
Mlu_00218.mRNA1	304
Mlu_00219.mRNA1	160
Mlu_00220.mRNA1	86
Mlu_00221.mRNA1	5
Mlu_00222.mRNA1	164
Mlu_00223.mRNA1	33
Mlu_00224.mRNA1	152
Mlu_00225.mRNA1	743
Mlu_00226.mRNA1	44
Mlu_00227.mRNA1	1814
Mlu_00228.mRNA1	9
Mlu_00229.mRNA1	88
Mlu_00230.mRNA1	174
Mlu_00231.mRNA1	0
Mlu_00232.mRNA1	0
Mlu_00233.mRNA1	15
Mlu_00234.mRNA1	0
Mlu_00235.mRNA1	192
Mlu_00236.mRNA1	173
Mlu_00237.mRNA1	1086
Mlu_00238.mRNA1	346
Mlu_00239.mRNA1	0
Mlu_00240.mRNA1	3
Mlu_00241.mRNA1	191
Mlu_00242.mRNA1	0
Mlu_00243.mRNA1	0
Mlu_00244.mRNA1	1
Mlu_00245.mRNA1	599
Mlu_00246.mRNA1	174
Mlu_00247.mRNA1	1233
Mlu_00248.mRNA1	138
Mlu_00249.mRNA1	299
Mlu_00250.mRNA1	102
Mlu_00251.mRNA1	4962
Mlu_00252.mRNA1	681
Mlu_00253.mRNA1	902
Mlu_00254.mRNA1	368
Mlu_00255.mRNA1	2526
Mlu_00256.mRNA1	10
Mlu_00257.mRNA1	2899
Mlu_00258.mRNA1	317
Mlu_00259.mRNA1	0
Mlu_00260.mRNA1	0
Mlu_00261.mRNA1	233
Mlu_00262.mRNA1	2173
Mlu_00263.mRNA1	690
Mlu_00264.mRNA1	3
Mlu_00265.mRNA1	0
Mlu_00266.mRNA1	160
Mlu_00267.mRNA1	11
Mlu_00268.mRNA1	3290
Mlu_00269.mRNA1	2446
Mlu_00270.mRNA1	174
Mlu_00271.mRNA1	3377
Mlu_00272.mRNA1	56
Mlu_00273.mRNA1	3807
Mlu_00274.mRNA1	0
Mlu_00275.mRNA1	12
Mlu_00276.mRNA1	234
Mlu_00277.mRNA1	3
Mlu_00278.mRNA1	44
Mlu_00279.mRNA1	0
Mlu_00280.mRNA1	1
Mlu_00281.mRNA1	7
Mlu_00282.mRNA1	145
Mlu_00283.mRNA1	0
Mlu_00284.mRNA1	740
Mlu_00285.mRNA1	334
Mlu_00286.mRNA1	302
Mlu_00287.mRNA1	263
Mlu_00288.mRNA1	635
Mlu_00289.mRNA1	3
Mlu_00290.mRNA1	0
Mlu_00291.mRNA1	182
Mlu_00292.mRNA1	0
Mlu_00293.mRNA1	358
Mlu_00294.mRNA1	1
Mlu_00295.mRNA1	62
Mlu_00296.mRNA1	772
Mlu_00297.mRNA1	0
Mlu_00298.mRNA1	475
Mlu_00299.mRNA1	2695
Mlu_00300.mRNA1	63
Mlu_00301.mRNA1	189
Mlu_00302.mRNA1	859
Mlu_00303.mRNA1	133
Mlu_00304.mRNA1	1090
Mlu_00305.mRNA1	838
Mlu_00306.mRNA1	76
Mlu_00307.mRNA1	0
Mlu_00308.mRNA1	232
Mlu_00309.mRNA1	166
Mlu_00310.mRNA1	0
Mlu_00311.mRNA1	201
Mlu_00312.mRNA1	797
Mlu_00313.mRNA1	2
Mlu_00314.mRNA1	0
Mlu_00315.mRNA1	398
Mlu_00316.mRNA1	0
Mlu_00317.mRNA1	0
Mlu_00318.mRNA1	439
Mlu_00319.mRNA1	0
Mlu_00320.mRNA1	17
Mlu_00321.mRNA1	1
Mlu_00322.mRNA1	153
Mlu_00323.mRNA1	200
Mlu_00324.mRNA1	2387
Mlu_00325.mRNA1	30
Mlu_00326.mRNA1	1047
Mlu_00327.mRNA1	425
Mlu_00328.mRNA1	0
Mlu_00329.mRNA1	272
Mlu_00330.mRNA1	0
Mlu_00331.mRNA1	102
Mlu_00332.mRNA1	0
Mlu_00333.mRNA1	0
Mlu_00334.mRNA1	96
Mlu_00335.mRNA1	0
Mlu_00336.mRNA1	96
Mlu_00337.mRNA1	115
Mlu_00338.mRNA1	0
Mlu_00339.mRNA1	15
Mlu_00340.mRNA1	535
Mlu_00341.mRNA1	3826
Mlu_00342.mRNA1	613
Mlu_00343.mRNA1	100
Mlu_00344.mRNA1	229
Mlu_00345.mRNA1	40
Mlu_00346.mRNA1	112
Mlu_00347.mRNA1	5
Mlu_00348.mRNA1	151
Mlu_00349.mRNA1	699
Mlu_00350.mRNA1	3
Mlu_00351.mRNA1	1
Mlu_00352.mRNA1	1
Mlu_00353.mRNA1	598
Mlu_00354.mRNA1	5
Mlu_00355.mRNA1	114
Mlu_00356.mRNA1	0
Mlu_00357.mRNA1	0
Mlu_00358.mRNA1	30
Mlu_00359.mRNA1	268
Mlu_00360.mRNA1	1
Mlu_00361.mRNA1	8
Mlu_00362.mRNA1	1273
Mlu_00363.mRNA1	83
Mlu_00364.mRNA1	241
Mlu_00365.mRNA1	109
Mlu_00366.mRNA1	2
Mlu_00367.mRNA1	291
Mlu_00368.mRNA1	878
Mlu_00369.mRNA1	534
Mlu_00370.mRNA1	416
Mlu_00371.mRNA1	0
Mlu_00372.mRNA1	485
Mlu_00373.mRNA1	173
Mlu_00374.mRNA1	17
Mlu_00375.mRNA1	1023
Mlu_00376.mRNA1	29
Mlu_00377.mRNA1	213
Mlu_00378.mRNA1	242
Mlu_00379.mRNA1	1279
Mlu_00380.mRNA1	252
Mlu_00381.mRNA1	785
Mlu_00382.mRNA1	20
Mlu_00383.mRNA1	122
Mlu_00384.mRNA1	0
Mlu_00385.mRNA1	8
Mlu_00386.mRNA1	21
Mlu_00387.mRNA1	403
Mlu_00388.mRNA1	0
Mlu_00389.mRNA1	109
Mlu_00390.mRNA1	7
Mlu_00391.mRNA1	364
Mlu_00392.mRNA1	101
Mlu_00393.mRNA1	230
Mlu_00394.mRNA1	873
Mlu_00395.mRNA1	315
Mlu_00396.mRNA1	165
Mlu_00397.mRNA1	293
Mlu_00398.mRNA1	119
Mlu_00399.mRNA1	344
Mlu_00400.mRNA1	136
Mlu_00401.mRNA1	162
Mlu_00402.mRNA1	8
Mlu_00403.mRNA1	152
Mlu_00404.mRNA1	4
Mlu_00405.mRNA1	1011
Mlu_00406.mRNA1	580
Mlu_00407.mRNA1	12
Mlu_00408.mRNA1	80
Mlu_00409.mRNA1	0
Mlu_00410.mRNA1	104
Mlu_00411.mRNA1	289
Mlu_00412.mRNA1	1978
Mlu_00413.mRNA1	0
Mlu_00414.mRNA1	147
Mlu_00415.mRNA1	0
Mlu_00416.mRNA1	194
Mlu_00417.mRNA1	110
Mlu_00418.mRNA1	117
Mlu_00419.mRNA1	558
Mlu_00420.mRNA1	248
Mlu_00421.mRNA1	64
Mlu_00422.mRNA1	5
Mlu_00423.mRNA1	308
Mlu_00424.mRNA1	59
Mlu_00425.mRNA1	5
Mlu_00426.mRNA1	32
Mlu_00427.mRNA1	0
Mlu_00428.mRNA1	17
Mlu_00429.mRNA1	55
Mlu_00430.mRNA1	274
Mlu_00431.mRNA1	1
Mlu_00432.mRNA1	138
Mlu_00433.mRNA1	5
Mlu_00434.mRNA1	98
Mlu_00435.mRNA1	111
Mlu_00436.mRNA1	940
Mlu_00437.mRNA1	79
Mlu_00438.mRNA1	10
Mlu_00439.mRNA1	25
Mlu_00440.mRNA1	406
Mlu_00441.mRNA1	624
Mlu_00442.mRNA1	52
Mlu_00443.mRNA1	65
Mlu_00444.mRNA1	235
Mlu_00445.mRNA1	1
Mlu_00446.mRNA1	0
Mlu_00447.mRNA1	0
Mlu_00448.mRNA1	4765
Mlu_00449.mRNA1	1
Mlu_00450.mRNA1	0
Mlu_00451.mRNA1	1383
Mlu_00452.mRNA1	21
Mlu_00453.mRNA1	1408
Mlu_00454.mRNA1	196
Mlu_00455.mRNA1	337
Mlu_00456.mRNA1	280
Mlu_00457.mRNA1	4
Mlu_00458.mRNA1	0
Mlu_00459.mRNA1	61
Mlu_00460.mRNA1	17
Mlu_00461.mRNA1	209
Mlu_00462.mRNA1	20
Mlu_00463.mRNA1	242
Mlu_00464.mRNA1	17
Mlu_00465.mRNA1	385
Mlu_00466.mRNA1	0
Mlu_00467.mRNA1	46
Mlu_00468.mRNA1	132
Mlu_00469.mRNA1	130
Mlu_00470.mRNA1	266
Mlu_00471.mRNA1	427
Mlu_00472.mRNA1	30
Mlu_00473.mRNA1	553
Mlu_00474.mRNA1	24
Mlu_00475.mRNA1	260
Mlu_00476.mRNA1	9062
Mlu_00477.mRNA1	90
Mlu_00478.mRNA1	0
Mlu_00479.mRNA1	0
Mlu_00480.mRNA1	472
Mlu_00481.mRNA1	571
Mlu_00482.mRNA1	4342
Mlu_00483.mRNA1	70
Mlu_00484.mRNA1	500
Mlu_00485.mRNA1	0
Mlu_00486.mRNA1	246
Mlu_00487.mRNA1	130
Mlu_00488.mRNA1	3029
Mlu_00489.mRNA1	964
Mlu_00490.mRNA1	179
Mlu_00491.mRNA1	251
Mlu_00492.mRNA1	110
Mlu_00493.mRNA1	1562
Mlu_00494.mRNA1	179
Mlu_00495.mRNA1	1
Mlu_00496.mRNA1	0
Mlu_00497.mRNA1	102
Mlu_00498.mRNA1	0
Mlu_00499.mRNA1	89
Mlu_00500.mRNA1	28
Mlu_00501.mRNA1	147
Mlu_00502.mRNA1	12
Mlu_00503.mRNA1	409
Mlu_00504.mRNA1	58
Mlu_00505.mRNA1	3
Mlu_00506.mRNA1	0
Mlu_00507.mRNA1	88
Mlu_00508.mRNA1	0
Mlu_00509.mRNA1	283
Mlu_00510.mRNA1	772
Mlu_00511.mRNA1	71
Mlu_00512.mRNA1	596
Mlu_00513.mRNA1	0
Mlu_00514.mRNA1	653
Mlu_00515.mRNA1	1040
Mlu_00516.mRNA1	93
Mlu_00517.mRNA1	0
Mlu_00518.mRNA1	3
Mlu_00519.mRNA1	431
Mlu_00520.mRNA1	18
Mlu_00521.mRNA1	583
Mlu_00522.mRNA1	141
Mlu_00523.mRNA1	61
Mlu_00524.mRNA1	6
Mlu_00525.mRNA1	1708
Mlu_00526.mRNA1	1
Mlu_00527.mRNA1	1
Mlu_00528.mRNA1	178
Mlu_00529.mRNA1	213
Mlu_00530.mRNA1	0
Mlu_00531.mRNA1	0
Mlu_00532.mRNA1	3
Mlu_00533.mRNA1	69
Mlu_00534.mRNA1	608
Mlu_00535.mRNA1	54
Mlu_00536.mRNA1	37
Mlu_00537.mRNA1	51
Mlu_00538.mRNA1	1519
Mlu_00539.mRNA1	184
Mlu_00540.mRNA1	0
Mlu_00541.mRNA1	45
Mlu_00542.mRNA1	6
Mlu_00543.mRNA1	203
Mlu_00544.mRNA1	661
Mlu_00545.mRNA1	7
Mlu_00546.mRNA1	2
Mlu_00547.mRNA1	18
Mlu_00548.mRNA1	0
Mlu_00549.mRNA1	0
Mlu_00550.mRNA1	71
Mlu_00551.mRNA1	354
Mlu_00552.mRNA1	2630
Mlu_00553.mRNA1	1
Mlu_00554.mRNA1	705
Mlu_00555.mRNA1	16
Mlu_00556.mRNA1	0
Mlu_00557.mRNA1	1
Mlu_00558.mRNA1	40
Mlu_00559.mRNA1	0
Mlu_00560.mRNA1	393
Mlu_00561.mRNA1	231
Mlu_00562.mRNA1	2879
Mlu_00563.mRNA1	14
Mlu_00564.mRNA1	0
Mlu_00565.mRNA1	1
Mlu_00566.mRNA1	39
Mlu_00567.mRNA1	74
Mlu_00568.mRNA1	70
Mlu_00569.mRNA1	102
Mlu_00570.mRNA1	76
Mlu_00571.mRNA1	881
Mlu_00572.mRNA1	230
Mlu_00573.mRNA1	41
Mlu_00574.mRNA1	281
Mlu_00575.mRNA1	119
Mlu_00576.mRNA1	0
Mlu_00577.mRNA1	14
Mlu_00578.mRNA1	987
Mlu_00579.mRNA1	72
Mlu_00580.mRNA1	78
Mlu_00581.mRNA1	375
Mlu_00582.mRNA1	3
Mlu_00583.mRNA1	112
Mlu_00584.mRNA1	257
Mlu_00585.mRNA1	118
Mlu_00586.mRNA1	178
Mlu_00587.mRNA1	1120
Mlu_00588.mRNA1	2
Mlu_00589.mRNA1	13
Mlu_00590.mRNA1	34
Mlu_00591.mRNA1	3059
Mlu_00592.mRNA1	0
Mlu_00593.mRNA1	18
Mlu_00594.mRNA1	669
Mlu_00595.mRNA1	11
Mlu_00596.mRNA1	1
Mlu_00597.mRNA1	0
Mlu_00598.mRNA1	6
Mlu_00599.mRNA1	65
Mlu_00600.mRNA1	820
Mlu_00601.mRNA1	4544
Mlu_00602.mRNA1	0
Mlu_00603.mRNA1	609
Mlu_00604.mRNA1	8
Mlu_00605.mRNA1	313
Mlu_00606.mRNA1	75
Mlu_00607.mRNA1	13
Mlu_00608.mRNA1	715
Mlu_00609.mRNA1	55
Mlu_00610.mRNA1	57
Mlu_00611.mRNA1	0
Mlu_00612.mRNA1	3
Mlu_00613.mRNA1	34
Mlu_00614.mRNA1	1759
Mlu_00615.mRNA1	589
Mlu_00616.mRNA1	0
Mlu_00617.mRNA1	347
Mlu_00618.mRNA1	0
Mlu_00619.mRNA1	0
Mlu_00620.mRNA1	980
Mlu_00621.mRNA1	651
Mlu_00622.mRNA1	1259
Mlu_00623.mRNA1	14
Mlu_00624.mRNA1	1574
Mlu_00625.mRNA1	15
Mlu_00626.mRNA1	11
Mlu_00627.mRNA1	1150
Mlu_00628.mRNA1	0
Mlu_00629.mRNA1	0
Mlu_00630.mRNA1	4
Mlu_00631.mRNA1	285
Mlu_00632.mRNA1	127
Mlu_00633.mRNA1	38
Mlu_00634.mRNA1	0
Mlu_00635.mRNA1	653
Mlu_00636.mRNA1	446
Mlu_00637.mRNA1	140
Mlu_00638.mRNA1	641
Mlu_00639.mRNA1	5
Mlu_00640.mRNA1	226
Mlu_00641.mRNA1	2
Mlu_00642.mRNA1	126
Mlu_00643.mRNA1	24
Mlu_00644.mRNA1	302
Mlu_00645.mRNA1	55
Mlu_00646.mRNA1	319
Mlu_00647.mRNA1	347
Mlu_00648.mRNA1	142
Mlu_00649.mRNA1	788
Mlu_00650.mRNA1	398
Mlu_00651.mRNA1	329
Mlu_00652.mRNA1	678
Mlu_00653.mRNA1	183
Mlu_00654.mRNA1	0
Mlu_00655.mRNA1	0
Mlu_00656.mRNA1	49
Mlu_00657.mRNA1	0
Mlu_00658.mRNA1	1
Mlu_00659.mRNA1	3106
Mlu_00660.mRNA1	23
Mlu_00661.mRNA1	50
Mlu_00662.mRNA1	121
Mlu_00663.mRNA1	0
Mlu_00664.mRNA1	48
Mlu_00665.mRNA1	0
Mlu_00666.mRNA1	26
Mlu_00667.mRNA1	74
Mlu_00668.mRNA1	6
Mlu_00669.mRNA1	2
Mlu_00670.mRNA1	1
Mlu_00671.mRNA1	138
Mlu_00672.mRNA1	17
Mlu_00673.mRNA1	0
Mlu_00674.mRNA1	6
Mlu_00675.mRNA1	0
Mlu_00676.mRNA1	294
Mlu_00677.mRNA1	147
Mlu_00678.mRNA1	3
Mlu_00679.mRNA1	623
Mlu_00680.mRNA1	383
Mlu_00681.mRNA1	67
Mlu_00682.mRNA1	370
Mlu_00683.mRNA1	675
Mlu_00684.mRNA1	0
Mlu_00685.mRNA1	41
Mlu_00686.mRNA1	891
Mlu_00687.mRNA1	1551
Mlu_00688.mRNA1	117
Mlu_00689.mRNA1	11
Mlu_00690.mRNA1	0
Mlu_00691.mRNA1	0
Mlu_00692.mRNA1	0
Mlu_00693.mRNA1	0
Mlu_00694.mRNA1	136
Mlu_00695.mRNA1	279
Mlu_00696.mRNA1	162
Mlu_00697.mRNA1	0
Mlu_00698.mRNA1	129
Mlu_00699.mRNA1	0
Mlu_00700.mRNA1	159
Mlu_00701.mRNA1	66
Mlu_00702.mRNA1	0
Mlu_00703.mRNA1	21
Mlu_00704.mRNA1	1277
Mlu_00705.mRNA1	225
Mlu_00706.mRNA1	723
Mlu_00707.mRNA1	54
Mlu_00708.mRNA1	134
Mlu_00709.mRNA1	150
Mlu_00710.mRNA1	43
Mlu_00711.mRNA1	9
Mlu_00712.mRNA1	33
Mlu_00713.mRNA1	307
Mlu_00714.mRNA1	455
Mlu_00715.mRNA1	0
Mlu_00716.mRNA1	208
Mlu_00717.mRNA1	31
Mlu_00718.mRNA1	86
Mlu_00719.mRNA1	87
Mlu_00720.mRNA1	22
Mlu_00721.mRNA1	232
Mlu_00722.mRNA1	3104
Mlu_00723.mRNA1	2
Mlu_00724.mRNA1	142
Mlu_00725.mRNA1	1464
Mlu_00726.mRNA1	0
Mlu_00727.mRNA1	38
Mlu_00728.mRNA1	0
Mlu_00729.mRNA1	0
Mlu_00730.mRNA1	49
Mlu_00731.mRNA1	919
Mlu_00732.mRNA1	1
Mlu_00733.mRNA1	60
Mlu_00734.mRNA1	27
Mlu_00735.mRNA1	0
Mlu_00736.mRNA1	243
Mlu_00737.mRNA1	978
Mlu_00738.mRNA1	380
Mlu_00739.mRNA1	276
Mlu_00740.mRNA1	0
Mlu_00741.mRNA1	0
Mlu_00742.mRNA1	0
Mlu_00743.mRNA1	477
Mlu_00744.mRNA1	75
Mlu_00745.mRNA1	377
Mlu_00746.mRNA1	33
Mlu_00747.mRNA1	79
Mlu_00748.mRNA1	7
Mlu_00749.mRNA1	8
Mlu_00750.mRNA1	0
Mlu_00751.mRNA1	0
Mlu_00752.mRNA1	0
Mlu_00753.mRNA1	1458
Mlu_00754.mRNA1	0
Mlu_00755.mRNA1	119
Mlu_00756.mRNA1	195
Mlu_00757.mRNA1	38
Mlu_00758.mRNA1	138
Mlu_00759.mRNA1	139
Mlu_00760.mRNA1	660
Mlu_00761.mRNA1	353
Mlu_00762.mRNA1	0
Mlu_00763.mRNA1	39
Mlu_00764.mRNA1	81
Mlu_00765.mRNA1	3486
Mlu_00766.mRNA1	1347
Mlu_00767.mRNA1	343
Mlu_00768.mRNA1	432
Mlu_00769.mRNA1	1
Mlu_00770.mRNA1	984
Mlu_00771.mRNA1	460
Mlu_00772.mRNA1	77
Mlu_00773.mRNA1	0
Mlu_00774.mRNA1	1
Mlu_00775.mRNA1	366
Mlu_00776.mRNA1	0
Mlu_00777.mRNA1	206
Mlu_00778.mRNA1	102
Mlu_00779.mRNA1	646
Mlu_00780.mRNA1	626
Mlu_00781.mRNA1	1
Mlu_00782.mRNA1	0
Mlu_00783.mRNA1	558
Mlu_00784.mRNA1	813
Mlu_00785.mRNA1	0
Mlu_00786.mRNA1	0
Mlu_00787.mRNA1	0
Mlu_00788.mRNA1	7
Mlu_00789.mRNA1	430
Mlu_00790.mRNA1	0
Mlu_00791.mRNA1	0
Mlu_00792.mRNA1	32
Mlu_00793.mRNA1	199
Mlu_00794.mRNA1	0
Mlu_00795.mRNA1	0
Mlu_00796.mRNA1	366
Mlu_00797.mRNA1	0
Mlu_00798.mRNA1	2015
Mlu_00799.mRNA1	61
Mlu_00800.mRNA1	1
Mlu_00801.mRNA1	0
Mlu_00802.mRNA1	230
Mlu_00803.mRNA1	25
Mlu_00804.mRNA1	1079
Mlu_00805.mRNA1	306
Mlu_00806.mRNA1	111
Mlu_00807.mRNA1	817
Mlu_00808.mRNA1	170
Mlu_00809.mRNA1	597
Mlu_00810.mRNA1	164
Mlu_00811.mRNA1	230
Mlu_00812.mRNA1	1
Mlu_00813.mRNA1	0
Mlu_00814.mRNA1	1128
Mlu_00815.mRNA1	492
Mlu_00816.mRNA1	22
Mlu_00817.mRNA1	699
Mlu_00818.mRNA1	1754
Mlu_00819.mRNA1	66
Mlu_00820.mRNA1	9
Mlu_00821.mRNA1	190
Mlu_00822.mRNA1	24
Mlu_00823.mRNA1	169
Mlu_00824.mRNA1	241
Mlu_00825.mRNA1	33
Mlu_00826.mRNA1	1096
Mlu_00827.mRNA1	145
Mlu_00828.mRNA1	1071
Mlu_00829.mRNA1	1121
Mlu_00830.mRNA1	3
Mlu_00831.mRNA1	107
Mlu_00832.mRNA1	46
Mlu_00833.mRNA1	1028
Mlu_00834.mRNA1	230
Mlu_00835.mRNA1	184
Mlu_00836.mRNA1	26
Mlu_00837.mRNA1	5
Mlu_00838.mRNA1	315
Mlu_00839.mRNA1	0
Mlu_00840.mRNA1	26
Mlu_00841.mRNA1	93
Mlu_00842.mRNA1	524
Mlu_00843.mRNA1	3
Mlu_00844.mRNA1	0
Mlu_00845.mRNA1	23
Mlu_00846.mRNA1	21
Mlu_00847.mRNA1	502
Mlu_00848.mRNA1	0
Mlu_00849.mRNA1	0
Mlu_00850.mRNA1	71
Mlu_00851.mRNA1	7
Mlu_00852.mRNA1	3
Mlu_00853.mRNA1	0
Mlu_00854.mRNA1	36
Mlu_00855.mRNA1	51
Mlu_00856.mRNA1	112
Mlu_00857.mRNA1	14
Mlu_00858.mRNA1	161
Mlu_00859.mRNA1	2
Mlu_00860.mRNA1	217
Mlu_00861.mRNA1	117
Mlu_00862.mRNA1	25
Mlu_00863.mRNA1	0
Mlu_00864.mRNA1	115
Mlu_00865.mRNA1	258
Mlu_00866.mRNA1	86
Mlu_00867.mRNA1	1383
Mlu_00868.mRNA1	124
Mlu_00869.mRNA1	184
Mlu_00870.mRNA1	0
Mlu_00871.mRNA1	71
Mlu_00872.mRNA1	0
Mlu_00873.mRNA1	2388
Mlu_00874.mRNA1	1
Mlu_00875.mRNA1	368
Mlu_00876.mRNA1	0
Mlu_00877.mRNA1	162
Mlu_00878.mRNA1	1472
Mlu_00879.mRNA1	2027
Mlu_00880.mRNA1	94
Mlu_00881.mRNA1	101
Mlu_00882.mRNA1	58
Mlu_00883.mRNA1	271
Mlu_00884.mRNA1	132
Mlu_00885.mRNA1	272
Mlu_00886.mRNA1	833
Mlu_00887.mRNA1	108
Mlu_00888.mRNA1	24
Mlu_00889.mRNA1	89
Mlu_00890.mRNA1	0
Mlu_00891.mRNA1	134
Mlu_00892.mRNA1	256
Mlu_00893.mRNA1	310
Mlu_00894.mRNA1	708
Mlu_00895.mRNA1	322
Mlu_00896.mRNA1	0
Mlu_00897.mRNA1	139
Mlu_00898.mRNA1	0
Mlu_00899.mRNA1	85
Mlu_00900.mRNA1	18
Mlu_00901.mRNA1	491
Mlu_00902.mRNA1	0
Mlu_00903.mRNA1	223
Mlu_00904.mRNA1	0
Mlu_00905.mRNA1	755
Mlu_00906.mRNA1	20
Mlu_00907.mRNA1	1
Mlu_00908.mRNA1	0
Mlu_00909.mRNA1	30
Mlu_00910.mRNA1	0
Mlu_00911.mRNA1	46
Mlu_00912.mRNA1	39
Mlu_00913.mRNA1	143
Mlu_00914.mRNA1	244
Mlu_00915.mRNA1	1
Mlu_00916.mRNA1	169
Mlu_00917.mRNA1	0
Mlu_00918.mRNA1	0
Mlu_00919.mRNA1	1
Mlu_00920.mRNA1	1
Mlu_00921.mRNA1	42
Mlu_00922.mRNA1	1059
Mlu_00923.mRNA1	1126
Mlu_00924.mRNA1	184
Mlu_00925.mRNA1	363
Mlu_00926.mRNA1	0
Mlu_00927.mRNA1	435
Mlu_00928.mRNA1	106
Mlu_00929.mRNA1	1
Mlu_00930.mRNA1	0
Mlu_00931.mRNA1	0
Mlu_00932.mRNA1	0
Mlu_00933.mRNA1	0
Mlu_00934.mRNA1	262
Mlu_00935.mRNA1	0
Mlu_00936.mRNA1	6
Mlu_00937.mRNA1	0
Mlu_00938.mRNA1	8
Mlu_00939.mRNA1	10
Mlu_00940.mRNA1	123
Mlu_00941.mRNA1	394
Mlu_00942.mRNA1	496
Mlu_00943.mRNA1	1920
Mlu_00944.mRNA1	279
Mlu_00945.mRNA1	38
Mlu_00946.mRNA1	402
Mlu_00947.mRNA1	403
Mlu_00948.mRNA1	25
Mlu_00949.mRNA1	1603
Mlu_00950.mRNA1	2
Mlu_00951.mRNA1	544
Mlu_00952.mRNA1	2
Mlu_00953.mRNA1	0
Mlu_00954.mRNA1	18
Mlu_00955.mRNA1	4339
Mlu_00956.mRNA1	47
Mlu_00957.mRNA1	1
Mlu_00958.mRNA1	0
Mlu_00959.mRNA1	0
Mlu_00960.mRNA1	74
Mlu_00961.mRNA1	440
Mlu_00962.mRNA1	90
Mlu_00963.mRNA1	343
Mlu_00964.mRNA1	25
Mlu_00965.mRNA1	48
Mlu_00966.mRNA1	857
Mlu_00967.mRNA1	104
Mlu_00968.mRNA1	48
Mlu_00969.mRNA1	75
Mlu_00970.mRNA1	20
Mlu_00971.mRNA1	951
Mlu_00972.mRNA1	243
Mlu_00973.mRNA1	135
Mlu_00974.mRNA1	98
Mlu_00975.mRNA1	0
Mlu_00976.mRNA1	210
Mlu_00977.mRNA1	409
Mlu_00978.mRNA1	575
Mlu_00979.mRNA1	19
Mlu_00980.mRNA1	10
Mlu_00981.mRNA1	2
Mlu_00982.mRNA1	0
Mlu_00983.mRNA1	24
Mlu_00984.mRNA1	31
Mlu_00985.mRNA1	16
Mlu_00986.mRNA1	277
Mlu_00987.mRNA1	33
Mlu_00988.mRNA1	0
Mlu_00989.mRNA1	9
Mlu_00990.mRNA1	2
Mlu_00991.mRNA1	25
Mlu_00992.mRNA1	13
Mlu_00993.mRNA1	3
Mlu_00994.mRNA1	123
Mlu_00995.mRNA1	2262
Mlu_00996.mRNA1	302
Mlu_00997.mRNA1	0
Mlu_00998.mRNA1	76
Mlu_00999.mRNA1	285
Mlu_01000.mRNA1	0
Mlu_01001.mRNA1	0
Mlu_01002.mRNA1	190
Mlu_01003.mRNA1	261
Mlu_01004.mRNA1	4
Mlu_01005.mRNA1	11
Mlu_01006.mRNA1	11819
Mlu_01007.mRNA1	8207
Mlu_01008.mRNA1	281
Mlu_01009.mRNA1	195
Mlu_01010.mRNA1	429
Mlu_01011.mRNA1	0
Mlu_01012.mRNA1	196
Mlu_01013.mRNA1	419
Mlu_01014.mRNA1	200
Mlu_01015.mRNA1	0
Mlu_01016.mRNA1	3636
Mlu_01017.mRNA1	19
Mlu_01018.mRNA1	577
Mlu_01019.mRNA1	2661
Mlu_01020.mRNA1	150
Mlu_01021.mRNA1	224
Mlu_01022.mRNA1	504
Mlu_01023.mRNA1	645
Mlu_01024.mRNA1	17
Mlu_01025.mRNA1	91
Mlu_01026.mRNA1	93
Mlu_01027.mRNA1	234
Mlu_01028.mRNA1	740
Mlu_01029.mRNA1	212
Mlu_01030.mRNA1	750
Mlu_01031.mRNA1	61
Mlu_01032.mRNA1	1117
Mlu_01033.mRNA1	404
Mlu_01034.mRNA1	101
Mlu_01035.mRNA1	106
Mlu_01036.mRNA1	2822
Mlu_01037.mRNA1	0
Mlu_01038.mRNA1	216
Mlu_01039.mRNA1	2
Mlu_01040.mRNA1	0
Mlu_01041.mRNA1	5
Mlu_01042.mRNA1	0
Mlu_01043.mRNA1	82
Mlu_01044.mRNA1	102
Mlu_01045.mRNA1	74
Mlu_01046.mRNA1	3
Mlu_01047.mRNA1	50
Mlu_01048.mRNA1	0
Mlu_01049.mRNA1	1605
Mlu_01050.mRNA1	423
Mlu_01051.mRNA1	0
Mlu_01052.mRNA1	0
Mlu_01053.mRNA1	406
Mlu_01054.mRNA1	95
Mlu_01055.mRNA1	753
Mlu_01056.mRNA1	2253
Mlu_01057.mRNA1	1292
Mlu_01058.mRNA1	1266
Mlu_01059.mRNA1	48
Mlu_01060.mRNA1	129
Mlu_01061.mRNA1	1
Mlu_01062.mRNA1	26
Mlu_01063.mRNA1	1
Mlu_01064.mRNA1	415
Mlu_01065.mRNA1	0
Mlu_01066.mRNA1	0
Mlu_01067.mRNA1	16
Mlu_01068.mRNA1	106
Mlu_01069.mRNA1	41
Mlu_01070.mRNA1	63
Mlu_01071.mRNA1	174
Mlu_01072.mRNA1	270
Mlu_01073.mRNA1	0
Mlu_01074.mRNA1	0
Mlu_01075.mRNA1	267
Mlu_01076.mRNA1	78
Mlu_01077.mRNA1	76
Mlu_01078.mRNA1	8
Mlu_01079.mRNA1	10
Mlu_01080.mRNA1	0
Mlu_01081.mRNA1	1
Mlu_01082.mRNA1	0
Mlu_01083.mRNA1	0
Mlu_01084.mRNA1	0
Mlu_01085.mRNA1	0
Mlu_01086.mRNA1	11
Mlu_01087.mRNA1	0
Mlu_01088.mRNA1	2087
Mlu_01089.mRNA1	2465
Mlu_01090.mRNA1	1535
Mlu_01091.mRNA1	383
Mlu_01092.mRNA1	44
Mlu_01093.mRNA1	235
Mlu_01094.mRNA1	3
Mlu_01095.mRNA1	4442
Mlu_01096.mRNA1	143
Mlu_01097.mRNA1	0
Mlu_01098.mRNA1	0
Mlu_01099.mRNA1	176
Mlu_01100.mRNA1	0
Mlu_01101.mRNA1	455
Mlu_01102.mRNA1	108
Mlu_01103.mRNA1	20
Mlu_01104.mRNA1	4
Mlu_01105.mRNA1	0
Mlu_01106.mRNA1	263
Mlu_01107.mRNA1	0
Mlu_01108.mRNA1	0
Mlu_01109.mRNA1	0
Mlu_01110.mRNA1	185
Mlu_01111.mRNA1	11
Mlu_01112.mRNA1	42
Mlu_01113.mRNA1	1498
Mlu_01114.mRNA1	77
Mlu_01115.mRNA1	259
Mlu_01116.mRNA1	544
Mlu_01117.mRNA1	0
Mlu_01118.mRNA1	1
Mlu_01119.mRNA1	0
Mlu_01120.mRNA1	22
Mlu_01121.mRNA1	69
Mlu_01122.mRNA1	0
Mlu_01123.mRNA1	7
Mlu_01124.mRNA1	153
Mlu_01125.mRNA1	89
Mlu_01126.mRNA1	17
Mlu_01127.mRNA1	0
Mlu_01128.mRNA1	0
Mlu_01129.mRNA1	12
Mlu_01130.mRNA1	1
Mlu_01131.mRNA1	4
Mlu_01132.mRNA1	0
Mlu_01133.mRNA1	4
Mlu_01134.mRNA1	225
Mlu_01135.mRNA1	0
Mlu_01136.mRNA1	57
Mlu_01137.mRNA1	0
Mlu_01138.mRNA1	211
Mlu_01139.mRNA1	60
Mlu_01140.mRNA1	0
Mlu_01141.mRNA1	5
Mlu_01142.mRNA1	1413
Mlu_01143.mRNA1	216
Mlu_01144.mRNA1	13
Mlu_01145.mRNA1	49
Mlu_01146.mRNA1	7
Mlu_01147.mRNA1	29
Mlu_01148.mRNA1	331
Mlu_01149.mRNA1	762
Mlu_01150.mRNA1	2
Mlu_01151.mRNA1	0
Mlu_01152.mRNA1	10
Mlu_01153.mRNA1	74
Mlu_01154.mRNA1	0
Mlu_01155.mRNA1	544
Mlu_01156.mRNA1	79
Mlu_01157.mRNA1	168
Mlu_01158.mRNA1	22
Mlu_01159.mRNA1	41
Mlu_01160.mRNA1	211
Mlu_01161.mRNA1	0
Mlu_01162.mRNA1	0
Mlu_01163.mRNA1	0
Mlu_01164.mRNA1	264
Mlu_01165.mRNA1	18
Mlu_01166.mRNA1	10
Mlu_01167.mRNA1	39
Mlu_01168.mRNA1	56
Mlu_01169.mRNA1	162
Mlu_01170.mRNA1	128
Mlu_01171.mRNA1	664
Mlu_01172.mRNA1	329
Mlu_01173.mRNA1	283
Mlu_01174.mRNA1	0
Mlu_01175.mRNA1	0
Mlu_01176.mRNA1	97
Mlu_01177.mRNA1	0
Mlu_01178.mRNA1	105
Mlu_01179.mRNA1	1
Mlu_01180.mRNA1	0
Mlu_01181.mRNA1	0
Mlu_01182.mRNA1	5
Mlu_01183.mRNA1	0
Mlu_01184.mRNA1	0
Mlu_01185.mRNA1	299
Mlu_01186.mRNA1	57
Mlu_01187.mRNA1	147
Mlu_01188.mRNA1	22
Mlu_01189.mRNA1	363
Mlu_01190.mRNA1	0
Mlu_01191.mRNA1	0
Mlu_01192.mRNA1	88
Mlu_01193.mRNA1	1198
Mlu_01194.mRNA1	420
Mlu_01195.mRNA1	4
Mlu_01196.mRNA1	1
Mlu_01197.mRNA1	100
Mlu_01198.mRNA1	24
Mlu_01199.mRNA1	409
Mlu_01200.mRNA1	133
Mlu_01201.mRNA1	226
Mlu_01202.mRNA1	274
Mlu_01203.mRNA1	6
Mlu_01204.mRNA1	61
Mlu_01205.mRNA1	241
Mlu_01206.mRNA1	16
Mlu_01207.mRNA1	0
Mlu_01208.mRNA1	0
Mlu_01209.mRNA1	40
Mlu_01210.mRNA1	12
Mlu_01211.mRNA1	2844
Mlu_01212.mRNA1	674
Mlu_01213.mRNA1	23
Mlu_01214.mRNA1	92
Mlu_01215.mRNA1	1
Mlu_01216.mRNA1	0
Mlu_01217.mRNA1	0
Mlu_01218.mRNA1	0
Mlu_01219.mRNA1	1
Mlu_01220.mRNA1	0
Mlu_01221.mRNA1	0
Mlu_01222.mRNA1	2
Mlu_01223.mRNA1	2
Mlu_01224.mRNA1	0
Mlu_01225.mRNA1	110
Mlu_01226.mRNA1	109
Mlu_01227.mRNA1	456
Mlu_01228.mRNA1	0
Mlu_01229.mRNA1	0
Mlu_01230.mRNA1	10
Mlu_01231.mRNA1	22
Mlu_01232.mRNA1	265
Mlu_01233.mRNA1	0
Mlu_01234.mRNA1	8
Mlu_01235.mRNA1	0
Mlu_01236.mRNA1	158
Mlu_01237.mRNA1	801
Mlu_01238.mRNA1	42
Mlu_01239.mRNA1	47
Mlu_01240.mRNA1	379
Mlu_01241.mRNA1	340
Mlu_01242.mRNA1	115
Mlu_01243.mRNA1	416
Mlu_01244.mRNA1	309
Mlu_01245.mRNA1	433
Mlu_01246.mRNA1	25
Mlu_01247.mRNA1	775
Mlu_01248.mRNA1	3
Mlu_01249.mRNA1	133
Mlu_01250.mRNA1	116
Mlu_01251.mRNA1	9
Mlu_01252.mRNA1	14
Mlu_01253.mRNA1	210
Mlu_01254.mRNA1	128
Mlu_01255.mRNA1	0
Mlu_01256.mRNA1	17
Mlu_01257.mRNA1	121
Mlu_01258.mRNA1	603
Mlu_01259.mRNA1	289
Mlu_01260.mRNA1	78
Mlu_01261.mRNA1	35
Mlu_01262.mRNA1	141
Mlu_01263.mRNA1	176
Mlu_01264.mRNA1	221
Mlu_01265.mRNA1	18
Mlu_01266.mRNA1	69
Mlu_01267.mRNA1	9
Mlu_01268.mRNA1	256
Mlu_01269.mRNA1	381
Mlu_01270.mRNA1	0
Mlu_01271.mRNA1	8
Mlu_01272.mRNA1	171
Mlu_01273.mRNA1	129
Mlu_01274.mRNA1	1
Mlu_01275.mRNA1	74
Mlu_01276.mRNA1	15
Mlu_01277.mRNA1	125
Mlu_01278.mRNA1	0
Mlu_01279.mRNA1	0
Mlu_01280.mRNA1	0
Mlu_01281.mRNA1	0
Mlu_01282.mRNA1	166
Mlu_01283.mRNA1	326
Mlu_01284.mRNA1	7
Mlu_01285.mRNA1	1
Mlu_01286.mRNA1	16
Mlu_01287.mRNA1	155
Mlu_01288.mRNA1	0
Mlu_01289.mRNA1	156
Mlu_01290.mRNA1	437
Mlu_01291.mRNA1	105
Mlu_01292.mRNA1	0
Mlu_01293.mRNA1	0
Mlu_01294.mRNA1	0
Mlu_01295.mRNA1	0
Mlu_01296.mRNA1	0
Mlu_01297.mRNA1	0
Mlu_01298.mRNA1	404
Mlu_01299.mRNA1	74
Mlu_01300.mRNA1	1
Mlu_01301.mRNA1	0
Mlu_01302.mRNA1	103
Mlu_01303.mRNA1	153
Mlu_01304.mRNA1	0
Mlu_01305.mRNA1	407
Mlu_01306.mRNA1	922
Mlu_01307.mRNA1	1
Mlu_01308.mRNA1	227
Mlu_01309.mRNA1	448
Mlu_01310.mRNA1	7
Mlu_01311.mRNA1	118
Mlu_01312.mRNA1	720
Mlu_01313.mRNA1	2150
Mlu_01314.mRNA1	13
Mlu_01315.mRNA1	75
Mlu_01316.mRNA1	537
Mlu_01317.mRNA1	272
Mlu_01318.mRNA1	0
Mlu_01319.mRNA1	479
Mlu_01320.mRNA1	1
Mlu_01321.mRNA1	248
Mlu_01322.mRNA1	47
Mlu_01323.mRNA1	0
Mlu_01324.mRNA1	2
Mlu_01325.mRNA1	1
Mlu_01326.mRNA1	15
Mlu_01327.mRNA1	3
Mlu_01328.mRNA1	294
Mlu_01329.mRNA1	13
Mlu_01330.mRNA1	0
Mlu_01331.mRNA1	485
Mlu_01332.mRNA1	893
Mlu_01333.mRNA1	1
Mlu_01334.mRNA1	93
Mlu_01335.mRNA1	56
Mlu_01336.mRNA1	1
Mlu_01337.mRNA1	0
Mlu_01338.mRNA1	619
Mlu_01339.mRNA1	332
Mlu_01340.mRNA1	0
Mlu_01341.mRNA1	32
Mlu_01342.mRNA1	3846
Mlu_01343.mRNA1	0
Mlu_01344.mRNA1	19
Mlu_01345.mRNA1	918
Mlu_01346.mRNA1	18
Mlu_01347.mRNA1	1
Mlu_01348.mRNA1	413
Mlu_01349.mRNA1	0
Mlu_01350.mRNA1	725
Mlu_01351.mRNA1	14
Mlu_01352.mRNA1	0
Mlu_01353.mRNA1	9382
Mlu_01354.mRNA1	0
Mlu_01355.mRNA1	58
Mlu_01356.mRNA1	12
Mlu_01357.mRNA1	332
Mlu_01358.mRNA1	0
Mlu_01359.mRNA1	0
Mlu_01360.mRNA1	0
Mlu_01361.mRNA1	379
Mlu_01362.mRNA1	0
Mlu_01363.mRNA1	0
Mlu_01364.mRNA1	23
Mlu_01365.mRNA1	125
Mlu_01366.mRNA1	154
Mlu_01367.mRNA1	266
Mlu_01368.mRNA1	1481
Mlu_01369.mRNA1	120
Mlu_01370.mRNA1	70
Mlu_01371.mRNA1	121
Mlu_01372.mRNA1	321
Mlu_01373.mRNA1	212
Mlu_01374.mRNA1	891
Mlu_01375.mRNA1	207
Mlu_01376.mRNA1	86
Mlu_01377.mRNA1	178
Mlu_01378.mRNA1	498
Mlu_01379.mRNA1	196
Mlu_01380.mRNA1	85
Mlu_01381.mRNA1	30
Mlu_01382.mRNA1	7
Mlu_01383.mRNA1	110
Mlu_01384.mRNA1	598
Mlu_01385.mRNA1	12101
Mlu_01386.mRNA1	0
Mlu_01387.mRNA1	10
Mlu_01388.mRNA1	0
Mlu_01389.mRNA1	0
Mlu_01390.mRNA1	3
Mlu_01391.mRNA1	640
Mlu_01392.mRNA1	575
Mlu_01393.mRNA1	97
Mlu_01394.mRNA1	0
Mlu_01395.mRNA1	243
Mlu_01396.mRNA1	473
Mlu_01397.mRNA1	421
Mlu_01398.mRNA1	5
Mlu_01399.mRNA1	348
Mlu_01400.mRNA1	180
Mlu_01401.mRNA1	91
Mlu_01402.mRNA1	0
Mlu_01403.mRNA1	34
Mlu_01404.mRNA1	4
Mlu_01405.mRNA1	0
Mlu_01406.mRNA1	294
Mlu_01407.mRNA1	11
Mlu_01408.mRNA1	1865
Mlu_01409.mRNA1	10
Mlu_01410.mRNA1	388
Mlu_01411.mRNA1	94
Mlu_01412.mRNA1	360
Mlu_01413.mRNA1	1
Mlu_01414.mRNA1	496
Mlu_01415.mRNA1	11
Mlu_01416.mRNA1	992
Mlu_01417.mRNA1	8
Mlu_01418.mRNA1	39
Mlu_01419.mRNA1	79
Mlu_01420.mRNA1	129
Mlu_01421.mRNA1	10
Mlu_01422.mRNA1	0
Mlu_01423.mRNA1	4
Mlu_01424.mRNA1	0
Mlu_01425.mRNA1	452
Mlu_01426.mRNA1	891
Mlu_01427.mRNA1	371
Mlu_01428.mRNA1	275
Mlu_01429.mRNA1	3
Mlu_01430.mRNA1	185
Mlu_01431.mRNA1	52
Mlu_01432.mRNA1	238
Mlu_01433.mRNA1	6056
Mlu_01434.mRNA1	95
Mlu_01435.mRNA1	0
Mlu_01436.mRNA1	8
Mlu_01437.mRNA1	42
Mlu_01438.mRNA1	526
Mlu_01439.mRNA1	99
Mlu_01440.mRNA1	10
Mlu_01441.mRNA1	173
Mlu_01442.mRNA1	352
Mlu_01443.mRNA1	111
Mlu_01444.mRNA1	0
Mlu_01445.mRNA1	0
Mlu_01446.mRNA1	149
Mlu_01447.mRNA1	83
Mlu_01448.mRNA1	2
Mlu_01449.mRNA1	268
Mlu_01450.mRNA1	7710
Mlu_01451.mRNA1	83
Mlu_01452.mRNA1	89
Mlu_01453.mRNA1	0
Mlu_01454.mRNA1	0
Mlu_01455.mRNA1	298
Mlu_01456.mRNA1	186
Mlu_01457.mRNA1	393
Mlu_01458.mRNA1	0
Mlu_01459.mRNA1	1
Mlu_01460.mRNA1	211
Mlu_01461.mRNA1	1171
Mlu_01462.mRNA1	88
Mlu_01463.mRNA1	9
Mlu_01464.mRNA1	50
Mlu_01465.mRNA1	45
Mlu_01466.mRNA1	547
Mlu_01467.mRNA1	5
Mlu_01468.mRNA1	274
Mlu_01469.mRNA1	6
Mlu_01470.mRNA1	265
Mlu_01471.mRNA1	107
Mlu_01472.mRNA1	709
Mlu_01473.mRNA1	48
Mlu_01474.mRNA1	136
Mlu_01475.mRNA1	131
Mlu_01476.mRNA1	39
Mlu_01477.mRNA1	811
Mlu_01478.mRNA1	1337
Mlu_01479.mRNA1	186
Mlu_01480.mRNA1	110
Mlu_01481.mRNA1	667
Mlu_01482.mRNA1	200
Mlu_01483.mRNA1	1418
Mlu_01484.mRNA1	973
Mlu_01485.mRNA1	380
Mlu_01486.mRNA1	942
Mlu_01487.mRNA1	0
Mlu_01488.mRNA1	0
Mlu_01489.mRNA1	278
Mlu_01490.mRNA1	26
Mlu_01491.mRNA1	2
Mlu_01492.mRNA1	19
Mlu_01493.mRNA1	0
Mlu_01494.mRNA1	0
Mlu_01495.mRNA1	0
Mlu_01496.mRNA1	0
Mlu_01497.mRNA1	0
Mlu_01498.mRNA1	116
Mlu_01499.mRNA1	178
Mlu_01500.mRNA1	36
Mlu_01501.mRNA1	3
Mlu_01502.mRNA1	0
Mlu_01503.mRNA1	48
Mlu_01504.mRNA1	20
Mlu_01505.mRNA1	1
Mlu_01506.mRNA1	2905
Mlu_01507.mRNA1	384
Mlu_01508.mRNA1	330
Mlu_01509.mRNA1	0
Mlu_01510.mRNA1	145
Mlu_01511.mRNA1	0
Mlu_01512.mRNA1	290
Mlu_01513.mRNA1	379
Mlu_01514.mRNA1	0
Mlu_01515.mRNA1	439
Mlu_01516.mRNA1	459
Mlu_01517.mRNA1	2278
Mlu_01518.mRNA1	0
Mlu_01519.mRNA1	1
Mlu_01520.mRNA1	38
Mlu_01521.mRNA1	6
Mlu_01522.mRNA1	34
Mlu_01523.mRNA1	517
Mlu_01524.mRNA1	507
Mlu_01525.mRNA1	1
Mlu_01526.mRNA1	86
Mlu_01527.mRNA1	114
Mlu_01528.mRNA1	23
Mlu_01529.mRNA1	119
Mlu_01530.mRNA1	3
Mlu_01531.mRNA1	1138
Mlu_01532.mRNA1	15
Mlu_01533.mRNA1	36
Mlu_01534.mRNA1	256
Mlu_01535.mRNA1	442
Mlu_01536.mRNA1	41
Mlu_01537.mRNA1	1875
Mlu_01538.mRNA1	203
Mlu_01539.mRNA1	10
Mlu_01540.mRNA1	0
Mlu_01541.mRNA1	0
Mlu_01542.mRNA1	0
Mlu_01543.mRNA1	0
Mlu_01544.mRNA1	61
Mlu_01545.mRNA1	215
Mlu_01546.mRNA1	284
Mlu_01547.mRNA1	571
Mlu_01548.mRNA1	1
Mlu_01549.mRNA1	39
Mlu_01550.mRNA1	2375
Mlu_01551.mRNA1	178
Mlu_01552.mRNA1	505
Mlu_01553.mRNA1	1
Mlu_01554.mRNA1	0
Mlu_01555.mRNA1	0
Mlu_01556.mRNA1	0
Mlu_01557.mRNA1	375
Mlu_01558.mRNA1	4
Mlu_01559.mRNA1	962
Mlu_01560.mRNA1	4
Mlu_01561.mRNA1	38
Mlu_01562.mRNA1	2352
Mlu_01563.mRNA1	0
Mlu_01564.mRNA1	16
Mlu_01565.mRNA1	8
Mlu_01566.mRNA1	1330
Mlu_01567.mRNA1	238
Mlu_01568.mRNA1	73
Mlu_01569.mRNA1	100
Mlu_01570.mRNA1	0
Mlu_01571.mRNA1	4
Mlu_01572.mRNA1	206
Mlu_01573.mRNA1	12
Mlu_01574.mRNA1	59
Mlu_01575.mRNA1	773
Mlu_01576.mRNA1	6
Mlu_01577.mRNA1	1
Mlu_01578.mRNA1	30
Mlu_01579.mRNA1	5
Mlu_01580.mRNA1	217
Mlu_01581.mRNA1	635
Mlu_01582.mRNA1	0
Mlu_01583.mRNA1	56
Mlu_01584.mRNA1	215
Mlu_01585.mRNA1	2
Mlu_01586.mRNA1	0
Mlu_01587.mRNA1	3
Mlu_01588.mRNA1	0
Mlu_01589.mRNA1	0
Mlu_01590.mRNA1	1
Mlu_01591.mRNA1	1
Mlu_01592.mRNA1	0
Mlu_01593.mRNA1	223
Mlu_01594.mRNA1	762
Mlu_01595.mRNA1	0
Mlu_01596.mRNA1	80
Mlu_01597.mRNA1	4
Mlu_01598.mRNA1	0
Mlu_01599.mRNA1	239
Mlu_01600.mRNA1	0
Mlu_01601.mRNA1	117
Mlu_01602.mRNA1	154
Mlu_01603.mRNA1	7
Mlu_01604.mRNA1	343
Mlu_01605.mRNA1	465
Mlu_01606.mRNA1	147
Mlu_01607.mRNA1	15
Mlu_01608.mRNA1	766
Mlu_01609.mRNA1	129
Mlu_01610.mRNA1	68
Mlu_01611.mRNA1	0
Mlu_01612.mRNA1	509
Mlu_01613.mRNA1	0
Mlu_01614.mRNA1	0
Mlu_01615.mRNA1	131
Mlu_01616.mRNA1	6
Mlu_01617.mRNA1	0
Mlu_01618.mRNA1	2172
Mlu_01619.mRNA1	322
Mlu_01620.mRNA1	833
Mlu_01621.mRNA1	19
Mlu_01622.mRNA1	0
Mlu_01623.mRNA1	0
Mlu_01624.mRNA1	120
Mlu_01625.mRNA1	9
Mlu_01626.mRNA1	629
Mlu_01627.mRNA1	263
Mlu_01628.mRNA1	22
Mlu_01629.mRNA1	779
Mlu_01630.mRNA1	0
Mlu_01631.mRNA1	0
Mlu_01632.mRNA1	0
Mlu_01633.mRNA1	50
Mlu_01634.mRNA1	71
Mlu_01635.mRNA1	339
Mlu_01636.mRNA1	46
Mlu_01637.mRNA1	0
Mlu_01638.mRNA1	0
Mlu_01639.mRNA1	296
Mlu_01640.mRNA1	714
Mlu_01641.mRNA1	68
Mlu_01642.mRNA1	83
Mlu_01643.mRNA1	4
Mlu_01644.mRNA1	145
Mlu_01645.mRNA1	174
Mlu_01646.mRNA1	276
Mlu_01647.mRNA1	24
Mlu_01648.mRNA1	17
Mlu_01649.mRNA1	48
Mlu_01650.mRNA1	315
Mlu_01651.mRNA1	1
Mlu_01652.mRNA1	0
Mlu_01653.mRNA1	465
Mlu_01654.mRNA1	43
Mlu_01655.mRNA1	33
Mlu_01656.mRNA1	376
Mlu_01657.mRNA1	753
Mlu_01658.mRNA1	3202
Mlu_01659.mRNA1	61
Mlu_01660.mRNA1	98
Mlu_01661.mRNA1	38
Mlu_01662.mRNA1	6
Mlu_01663.mRNA1	999
Mlu_01664.mRNA1	129
Mlu_01665.mRNA1	106
Mlu_01666.mRNA1	0
Mlu_01667.mRNA1	0
Mlu_01668.mRNA1	171
Mlu_01669.mRNA1	0
Mlu_01670.mRNA1	4
Mlu_01671.mRNA1	214
Mlu_01672.mRNA1	231
Mlu_01673.mRNA1	2213
Mlu_01674.mRNA1	109
Mlu_01675.mRNA1	325
Mlu_01676.mRNA1	0
Mlu_01677.mRNA1	1087
Mlu_01678.mRNA1	3752
Mlu_01679.mRNA1	577
Mlu_01680.mRNA1	0
Mlu_01681.mRNA1	1446
Mlu_01682.mRNA1	304
Mlu_01683.mRNA1	21
Mlu_01684.mRNA1	5
Mlu_01685.mRNA1	46
Mlu_01686.mRNA1	169
Mlu_01687.mRNA1	238
Mlu_01688.mRNA1	2
Mlu_01689.mRNA1	396
Mlu_01690.mRNA1	67
Mlu_01691.mRNA1	252
Mlu_01692.mRNA1	92
Mlu_01693.mRNA1	1241
Mlu_01694.mRNA1	53
Mlu_01695.mRNA1	1211
Mlu_01696.mRNA1	1227
Mlu_01697.mRNA1	54
Mlu_01698.mRNA1	342
Mlu_01699.mRNA1	235
Mlu_01700.mRNA1	33
Mlu_01701.mRNA1	0
Mlu_01702.mRNA1	229
Mlu_01703.mRNA1	109
Mlu_01704.mRNA1	0
Mlu_01705.mRNA1	1
Mlu_01706.mRNA1	103
Mlu_01707.mRNA1	0
Mlu_01708.mRNA1	2
Mlu_01709.mRNA1	13
Mlu_01710.mRNA1	628
Mlu_01711.mRNA1	0
Mlu_01712.mRNA1	65
Mlu_01713.mRNA1	2690
Mlu_01714.mRNA1	520
Mlu_01715.mRNA1	0
Mlu_01716.mRNA1	568
Mlu_01717.mRNA1	18
Mlu_01718.mRNA1	56
Mlu_01719.mRNA1	0
Mlu_01720.mRNA1	4
Mlu_01721.mRNA1	83
Mlu_01722.mRNA1	43
Mlu_01723.mRNA1	3
Mlu_01724.mRNA1	15
Mlu_01725.mRNA1	2
Mlu_01726.mRNA1	159
Mlu_01727.mRNA1	51
Mlu_01728.mRNA1	78
Mlu_01729.mRNA1	35
Mlu_01730.mRNA1	59
Mlu_01731.mRNA1	0
Mlu_01732.mRNA1	0
Mlu_01733.mRNA1	1041
Mlu_01734.mRNA1	1954
Mlu_01735.mRNA1	0
Mlu_01736.mRNA1	28
Mlu_01737.mRNA1	0
Mlu_01738.mRNA1	255
Mlu_01739.mRNA1	1
Mlu_01740.mRNA1	0
Mlu_01741.mRNA1	0
Mlu_01742.mRNA1	0
Mlu_01743.mRNA1	23
Mlu_01744.mRNA1	290
Mlu_01745.mRNA1	256
Mlu_01746.mRNA1	59
Mlu_01747.mRNA1	558
Mlu_01748.mRNA1	1642
Mlu_01749.mRNA1	18
Mlu_01750.mRNA1	35
Mlu_01751.mRNA1	129
Mlu_01752.mRNA1	74
Mlu_01753.mRNA1	2
Mlu_01754.mRNA1	328
Mlu_01755.mRNA1	5
Mlu_01756.mRNA1	0
Mlu_01757.mRNA1	752
Mlu_01758.mRNA1	18
Mlu_01759.mRNA1	291
Mlu_01760.mRNA1	0
Mlu_01761.mRNA1	1
Mlu_01762.mRNA1	5
Mlu_01763.mRNA1	1318
Mlu_01764.mRNA1	191
Mlu_01765.mRNA1	0
Mlu_01766.mRNA1	0
Mlu_01767.mRNA1	391
Mlu_01768.mRNA1	133
Mlu_01769.mRNA1	0
Mlu_01770.mRNA1	40
Mlu_01771.mRNA1	75
Mlu_01772.mRNA1	1211
Mlu_01773.mRNA1	0
Mlu_01774.mRNA1	0
Mlu_01775.mRNA1	0
Mlu_01776.mRNA1	33
Mlu_01777.mRNA1	0
Mlu_01778.mRNA1	0
Mlu_01779.mRNA1	0
Mlu_01780.mRNA1	0
Mlu_01781.mRNA1	0
Mlu_01782.mRNA1	5
Mlu_01783.mRNA1	0
Mlu_01784.mRNA1	0
Mlu_01785.mRNA1	36
Mlu_01786.mRNA1	0
Mlu_01787.mRNA1	39
Mlu_01788.mRNA1	1545
Mlu_01789.mRNA1	758
Mlu_01790.mRNA1	0
Mlu_01791.mRNA1	0
Mlu_01792.mRNA1	144
Mlu_01793.mRNA1	687
Mlu_01794.mRNA1	1
Mlu_01795.mRNA1	0
Mlu_01796.mRNA1	47
Mlu_01797.mRNA1	93
Mlu_01798.mRNA1	12
Mlu_01799.mRNA1	207
Mlu_01800.mRNA1	4
Mlu_01801.mRNA1	206
Mlu_01802.mRNA1	351
Mlu_01803.mRNA1	221
Mlu_01804.mRNA1	2
Mlu_01805.mRNA1	156
Mlu_01806.mRNA1	360
Mlu_01807.mRNA1	35
Mlu_01808.mRNA1	1
Mlu_01809.mRNA1	0
Mlu_01810.mRNA1	388
Mlu_01811.mRNA1	490
Mlu_01812.mRNA1	0
Mlu_01813.mRNA1	35
Mlu_01814.mRNA1	0
Mlu_01815.mRNA1	24
Mlu_01816.mRNA1	176
Mlu_01817.mRNA1	2
Mlu_01818.mRNA1	295
Mlu_01819.mRNA1	439
Mlu_01820.mRNA1	93
Mlu_01821.mRNA1	9
Mlu_01822.mRNA1	114
Mlu_01823.mRNA1	69
Mlu_01824.mRNA1	2
Mlu_01825.mRNA1	0
Mlu_01826.mRNA1	137
Mlu_01827.mRNA1	177
Mlu_01828.mRNA1	399
Mlu_01829.mRNA1	0
Mlu_01830.mRNA1	0
Mlu_01831.mRNA1	0
Mlu_01832.mRNA1	1
Mlu_01833.mRNA1	54
Mlu_01834.mRNA1	133
Mlu_01835.mRNA1	43
Mlu_01836.mRNA1	25
Mlu_01837.mRNA1	29
Mlu_01838.mRNA1	257
Mlu_01839.mRNA1	16
Mlu_01840.mRNA1	147
Mlu_01841.mRNA1	1170
Mlu_01842.mRNA1	62
Mlu_01843.mRNA1	1
Mlu_01844.mRNA1	0
Mlu_01845.mRNA1	28
Mlu_01846.mRNA1	1835
Mlu_01847.mRNA1	33
Mlu_01848.mRNA1	6
Mlu_01849.mRNA1	27
Mlu_01850.mRNA1	1929
Mlu_01851.mRNA1	104
Mlu_01852.mRNA1	12
Mlu_01853.mRNA1	493
Mlu_01854.mRNA1	358
Mlu_01855.mRNA1	917
Mlu_01856.mRNA1	12
Mlu_01857.mRNA1	7
Mlu_01858.mRNA1	347
Mlu_01859.mRNA1	0
Mlu_01860.mRNA1	2
Mlu_01861.mRNA1	469
Mlu_01862.mRNA1	146
Mlu_01863.mRNA1	483
Mlu_01864.mRNA1	61
Mlu_01865.mRNA1	23
Mlu_01866.mRNA1	346
Mlu_01867.mRNA1	0
Mlu_01868.mRNA1	0
Mlu_01869.mRNA1	118
Mlu_01870.mRNA1	305
Mlu_01871.mRNA1	147
Mlu_01872.mRNA1	1
Mlu_01873.mRNA1	0
Mlu_01874.mRNA1	0
Mlu_01875.mRNA1	26
Mlu_01876.mRNA1	0
Mlu_01877.mRNA1	0
Mlu_01878.mRNA1	1863
Mlu_01879.mRNA1	87
Mlu_01880.mRNA1	1333
Mlu_01881.mRNA1	489
Mlu_01882.mRNA1	2
Mlu_01883.mRNA1	7
Mlu_01884.mRNA1	73
Mlu_01885.mRNA1	1
Mlu_01886.mRNA1	0
Mlu_01887.mRNA1	34
Mlu_01888.mRNA1	22
Mlu_01889.mRNA1	185
Mlu_01890.mRNA1	0
Mlu_01891.mRNA1	231
Mlu_01892.mRNA1	1
Mlu_01893.mRNA1	0
Mlu_01894.mRNA1	0
Mlu_01895.mRNA1	0
Mlu_01896.mRNA1	74
Mlu_01897.mRNA1	4
Mlu_01898.mRNA1	0
Mlu_01899.mRNA1	471
Mlu_01900.mRNA1	448
Mlu_01901.mRNA1	213
Mlu_01902.mRNA1	84
Mlu_01903.mRNA1	181
Mlu_01904.mRNA1	0
Mlu_01905.mRNA1	1246
Mlu_01906.mRNA1	0
Mlu_01907.mRNA1	213
Mlu_01908.mRNA1	181
Mlu_01909.mRNA1	12
Mlu_01910.mRNA1	0
Mlu_01911.mRNA1	0
Mlu_01912.mRNA1	564
Mlu_01913.mRNA1	5590
Mlu_01914.mRNA1	122
Mlu_01915.mRNA1	282
Mlu_01916.mRNA1	1923
Mlu_01917.mRNA1	251
Mlu_01918.mRNA1	14
Mlu_01919.mRNA1	3
Mlu_01920.mRNA1	208
Mlu_01921.mRNA1	1
Mlu_01922.mRNA1	142
Mlu_01923.mRNA1	1492
Mlu_01924.mRNA1	816
Mlu_01925.mRNA1	2
Mlu_01926.mRNA1	199
Mlu_01927.mRNA1	3841
Mlu_01928.mRNA1	103
Mlu_01929.mRNA1	13
Mlu_01930.mRNA1	294
Mlu_01931.mRNA1	468
Mlu_01932.mRNA1	51
Mlu_01933.mRNA1	1
Mlu_01934.mRNA1	0
Mlu_01935.mRNA1	3
Mlu_01936.mRNA1	362
Mlu_01937.mRNA1	0
Mlu_01938.mRNA1	262
Mlu_01939.mRNA1	70
Mlu_01940.mRNA1	524
Mlu_01941.mRNA1	442
Mlu_01942.mRNA1	939
Mlu_01943.mRNA1	3
Mlu_01944.mRNA1	136
Mlu_01945.mRNA1	409
Mlu_01946.mRNA1	0
Mlu_01947.mRNA1	0
Mlu_01948.mRNA1	8
Mlu_01949.mRNA1	1
Mlu_01950.mRNA1	80
Mlu_01951.mRNA1	1
Mlu_01952.mRNA1	0
Mlu_01953.mRNA1	7
Mlu_01954.mRNA1	1
Mlu_01955.mRNA1	1
Mlu_01956.mRNA1	425
Mlu_01957.mRNA1	91
Mlu_01958.mRNA1	281
Mlu_01959.mRNA1	0
Mlu_01960.mRNA1	57
Mlu_01961.mRNA1	37
Mlu_01962.mRNA1	0
Mlu_01963.mRNA1	61
Mlu_01964.mRNA1	0
Mlu_01965.mRNA1	0
Mlu_01966.mRNA1	3
Mlu_01967.mRNA1	197
Mlu_01968.mRNA1	1
Mlu_01969.mRNA1	55
Mlu_01970.mRNA1	334
Mlu_01971.mRNA1	20
Mlu_01972.mRNA1	4
Mlu_01973.mRNA1	0
Mlu_01974.mRNA1	225
Mlu_01975.mRNA1	27
Mlu_01976.mRNA1	2585
Mlu_01977.mRNA1	811
Mlu_01978.mRNA1	88
Mlu_01979.mRNA1	45
Mlu_01980.mRNA1	2
Mlu_01981.mRNA1	1
Mlu_01982.mRNA1	188
Mlu_01983.mRNA1	8
Mlu_01984.mRNA1	115
Mlu_01985.mRNA1	0
Mlu_01986.mRNA1	0
Mlu_01987.mRNA1	178
Mlu_01988.mRNA1	0
Mlu_01989.mRNA1	0
Mlu_01990.mRNA1	421
Mlu_01991.mRNA1	0
Mlu_01992.mRNA1	62
Mlu_01993.mRNA1	0
Mlu_01994.mRNA1	268
Mlu_01995.mRNA1	214
Mlu_01996.mRNA1	2
Mlu_01997.mRNA1	54
Mlu_01998.mRNA1	11
Mlu_01999.mRNA1	0
Mlu_02000.mRNA1	25
[truncated: 44,860 more rows]

## Sheet: S7
Mlu_00001.mRNA1	487
Mlu_00002.mRNA1	137
Mlu_00003.mRNA1	0
Mlu_00004.mRNA1	171
Mlu_00005.mRNA1	231
Mlu_00006.mRNA1	173
Mlu_00007.mRNA1	80
Mlu_00008.mRNA1	793
Mlu_00009.mRNA1	921
Mlu_00010.mRNA1	8
Mlu_00011.mRNA1	3
Mlu_00012.mRNA1	208
Mlu_00013.mRNA1	4
Mlu_00014.mRNA1	219
Mlu_00015.mRNA1	0
Mlu_00016.mRNA1	74
Mlu_00017.mRNA1	0
Mlu_00018.mRNA1	29
Mlu_00019.mRNA1	5
Mlu_00020.mRNA1	78
Mlu_00021.mRNA1	21
Mlu_00022.mRNA1	206
Mlu_00023.mRNA1	716
Mlu_00024.mRNA1	0
Mlu_00025.mRNA1	131
Mlu_00026.mRNA1	69
Mlu_00027.mRNA1	374
Mlu_00028.mRNA1	13
Mlu_00029.mRNA1	1089
Mlu_00030.mRNA1	662
Mlu_00031.mRNA1	109
Mlu_00032.mRNA1	0
Mlu_00033.mRNA1	375
Mlu_00034.mRNA1	261
Mlu_00035.mRNA1	292
Mlu_00036.mRNA1	1167
Mlu_00037.mRNA1	23
Mlu_00038.mRNA1	1306
Mlu_00039.mRNA1	56
Mlu_00040.mRNA1	4
Mlu_00041.mRNA1	15
Mlu_00042.mRNA1	0
Mlu_00043.mRNA1	0
Mlu_00044.mRNA1	400
Mlu_00045.mRNA1	404
Mlu_00046.mRNA1	54
Mlu_00047.mRNA1	4
Mlu_00048.mRNA1	164
Mlu_00049.mRNA1	0
Mlu_00050.mRNA1	7818
Mlu_00051.mRNA1	0
Mlu_00052.mRNA1	2
Mlu_00053.mRNA1	2
Mlu_00054.mRNA1	0
Mlu_00055.mRNA1	0
Mlu_00056.mRNA1	0
Mlu_00057.mRNA1	5
Mlu_00058.mRNA1	39
Mlu_00059.mRNA1	187
Mlu_00060.mRNA1	6
Mlu_00061.mRNA1	1933
Mlu_00062.mRNA1	0
Mlu_00063.mRNA1	213
Mlu_00064.mRNA1	283
Mlu_00065.mRNA1	2019
Mlu_00066.mRNA1	24
Mlu_00067.mRNA1	6079
Mlu_00068.mRNA1	54
Mlu_00069.mRNA1	0
Mlu_00070.mRNA1	28
Mlu_00071.mRNA1	0
Mlu_00072.mRNA1	327
Mlu_00073.mRNA1	255
Mlu_00074.mRNA1	8
Mlu_00075.mRNA1	1
Mlu_00076.mRNA1	0
Mlu_00077.mRNA1	19
Mlu_00078.mRNA1	0
Mlu_00079.mRNA1	637
Mlu_00080.mRNA1	0
Mlu_00081.mRNA1	246
Mlu_00082.mRNA1	0
Mlu_00083.mRNA1	16
Mlu_00084.mRNA1	248
Mlu_00085.mRNA1	14
Mlu_00086.mRNA1	617
Mlu_00087.mRNA1	263
Mlu_00088.mRNA1	1132
Mlu_00089.mRNA1	3907
Mlu_00090.mRNA1	0
Mlu_00091.mRNA1	6
Mlu_00092.mRNA1	443
Mlu_00093.mRNA1	590
Mlu_00094.mRNA1	563
Mlu_00095.mRNA1	3
Mlu_00096.mRNA1	64
Mlu_00097.mRNA1	0
Mlu_00098.mRNA1	0
Mlu_00099.mRNA1	0
Mlu_00100.mRNA1	9
Mlu_00101.mRNA1	1
Mlu_00102.mRNA1	432
Mlu_00103.mRNA1	2
Mlu_00104.mRNA1	1618
Mlu_00105.mRNA1	46
Mlu_00106.mRNA1	288
Mlu_00107.mRNA1	5
Mlu_00108.mRNA1	1195
Mlu_00109.mRNA1	1290
Mlu_00110.mRNA1	100
Mlu_00111.mRNA1	1185
Mlu_00112.mRNA1	64
Mlu_00113.mRNA1	14
Mlu_00114.mRNA1	685
Mlu_00115.mRNA1	174
Mlu_00116.mRNA1	769
Mlu_00117.mRNA1	101
Mlu_00118.mRNA1	294
Mlu_00119.mRNA1	18
Mlu_00120.mRNA1	640
Mlu_00121.mRNA1	101
Mlu_00122.mRNA1	203
Mlu_00123.mRNA1	524
Mlu_00124.mRNA1	144
Mlu_00125.mRNA1	121
Mlu_00126.mRNA1	90
Mlu_00127.mRNA1	603
Mlu_00128.mRNA1	1268
Mlu_00129.mRNA1	2623
Mlu_00130.mRNA1	74
Mlu_00131.mRNA1	346
Mlu_00132.mRNA1	408
Mlu_00133.mRNA1	17
Mlu_00134.mRNA1	88
Mlu_00135.mRNA1	2
Mlu_00136.mRNA1	0
Mlu_00137.mRNA1	0
Mlu_00138.mRNA1	42
Mlu_00139.mRNA1	0
Mlu_00140.mRNA1	398
Mlu_00141.mRNA1	54
Mlu_00142.mRNA1	274
Mlu_00143.mRNA1	205
Mlu_00144.mRNA1	320
Mlu_00145.mRNA1	0
Mlu_00146.mRNA1	0
Mlu_00147.mRNA1	63
Mlu_00148.mRNA1	0
Mlu_00149.mRNA1	6
Mlu_00150.mRNA1	249
Mlu_00151.mRNA1	43
Mlu_00152.mRNA1	301
Mlu_00153.mRNA1	0
Mlu_00154.mRNA1	1200
Mlu_00155.mRNA1	266
Mlu_00156.mRNA1	10665
Mlu_00157.mRNA1	28
Mlu_00158.mRNA1	0
Mlu_00159.mRNA1	0
Mlu_00160.mRNA1	834
Mlu_00161.mRNA1	16
Mlu_00162.mRNA1	0
Mlu_00163.mRNA1	417
Mlu_00164.mRNA1	2127
Mlu_00165.mRNA1	58
Mlu_00166.mRNA1	131
Mlu_00167.mRNA1	0
Mlu_00168.mRNA1	0
Mlu_00169.mRNA1	165
Mlu_00170.mRNA1	138
Mlu_00171.mRNA1	572
Mlu_00172.mRNA1	81
Mlu_00173.mRNA1	87
Mlu_00174.mRNA1	111
Mlu_00175.mRNA1	511
Mlu_00176.mRNA1	220
Mlu_00177.mRNA1	566
Mlu_00178.mRNA1	10
Mlu_00179.mRNA1	412
Mlu_00180.mRNA1	64
Mlu_00181.mRNA1	10
Mlu_00182.mRNA1	6
Mlu_00183.mRNA1	0
Mlu_00184.mRNA1	0
Mlu_00185.mRNA1	0
Mlu_00186.mRNA1	655
Mlu_00187.mRNA1	687
Mlu_00188.mRNA1	3333
Mlu_00189.mRNA1	656
Mlu_00190.mRNA1	253
Mlu_00191.mRNA1	31
Mlu_00192.mRNA1	21
Mlu_00193.mRNA1	8
Mlu_00194.mRNA1	6
Mlu_00195.mRNA1	1200
Mlu_00196.mRNA1	692
Mlu_00197.mRNA1	15
Mlu_00198.mRNA1	2
Mlu_00199.mRNA1	0
Mlu_00200.mRNA1	95
Mlu_00201.mRNA1	339
Mlu_00202.mRNA1	139
Mlu_00203.mRNA1	74
Mlu_00204.mRNA1	0
Mlu_00205.mRNA1	73
Mlu_00206.mRNA1	86
Mlu_00207.mRNA1	1
Mlu_00208.mRNA1	664
Mlu_00209.mRNA1	158
Mlu_00210.mRNA1	16
Mlu_00211.mRNA1	7
Mlu_00212.mRNA1	53
Mlu_00213.mRNA1	341
Mlu_00214.mRNA1	4
Mlu_00215.mRNA1	1039
Mlu_00216.mRNA1	177
Mlu_00217.mRNA1	247
Mlu_00218.mRNA1	340
Mlu_00219.mRNA1	259
Mlu_00220.mRNA1	83
Mlu_00221.mRNA1	4
Mlu_00222.mRNA1	192
Mlu_00223.mRNA1	72
Mlu_00224.mRNA1	245
Mlu_00225.mRNA1	1081
Mlu_00226.mRNA1	50
Mlu_00227.mRNA1	2787
Mlu_00228.mRNA1	10
Mlu_00229.mRNA1	121
Mlu_00230.mRNA1	272
Mlu_00231.mRNA1	0
Mlu_00232.mRNA1	0
Mlu_00233.mRNA1	13
Mlu_00234.mRNA1	0
Mlu_00235.mRNA1	316
Mlu_00236.mRNA1	158
Mlu_00237.mRNA1	1819
Mlu_00238.mRNA1	633
Mlu_00239.mRNA1	0
Mlu_00240.mRNA1	1
Mlu_00241.mRNA1	214
Mlu_00242.mRNA1	0
Mlu_00243.mRNA1	0
Mlu_00244.mRNA1	0
Mlu_00245.mRNA1	978
Mlu_00246.mRNA1	313
Mlu_00247.mRNA1	1981
Mlu_00248.mRNA1	134
Mlu_00249.mRNA1	483
Mlu_00250.mRNA1	175
Mlu_00251.mRNA1	5581
Mlu_00252.mRNA1	733
Mlu_00253.mRNA1	1528
Mlu_00254.mRNA1	540
Mlu_00255.mRNA1	3119
Mlu_00256.mRNA1	10
Mlu_00257.mRNA1	4484
Mlu_00258.mRNA1	371
Mlu_00259.mRNA1	0
Mlu_00260.mRNA1	0
Mlu_00261.mRNA1	394
Mlu_00262.mRNA1	2639
Mlu_00263.mRNA1	821
Mlu_00264.mRNA1	15
Mlu_00265.mRNA1	0
Mlu_00266.mRNA1	280
Mlu_00267.mRNA1	6
Mlu_00268.mRNA1	3523
Mlu_00269.mRNA1	3781
Mlu_00270.mRNA1	219
Mlu_00271.mRNA1	4297
Mlu_00272.mRNA1	31
Mlu_00273.mRNA1	5957
Mlu_00274.mRNA1	0
Mlu_00275.mRNA1	28
Mlu_00276.mRNA1	376
Mlu_00277.mRNA1	3
Mlu_00278.mRNA1	65
Mlu_00279.mRNA1	0
Mlu_00280.mRNA1	1
Mlu_00281.mRNA1	4
Mlu_00282.mRNA1	302
Mlu_00283.mRNA1	0
Mlu_00284.mRNA1	1537
Mlu_00285.mRNA1	604
Mlu_00286.mRNA1	526
Mlu_00287.mRNA1	426
Mlu_00288.mRNA1	1054
Mlu_00289.mRNA1	9
Mlu_00290.mRNA1	0
Mlu_00291.mRNA1	305
Mlu_00292.mRNA1	0
Mlu_00293.mRNA1	451
Mlu_00294.mRNA1	1
Mlu_00295.mRNA1	54
Mlu_00296.mRNA1	1073
Mlu_00297.mRNA1	0
Mlu_00298.mRNA1	691
Mlu_00299.mRNA1	6193
Mlu_00300.mRNA1	78
Mlu_00301.mRNA1	209
Mlu_00302.mRNA1	1074
Mlu_00303.mRNA1	152
Mlu_00304.mRNA1	1310
Mlu_00305.mRNA1	1092
Mlu_00306.mRNA1	114
Mlu_00307.mRNA1	0
Mlu_00308.mRNA1	249
Mlu_00309.mRNA1	236
Mlu_00310.mRNA1	0
Mlu_00311.mRNA1	134
Mlu_00312.mRNA1	1154
Mlu_00313.mRNA1	1
Mlu_00314.mRNA1	0
Mlu_00315.mRNA1	502
Mlu_00316.mRNA1	0
Mlu_00317.mRNA1	3
Mlu_00318.mRNA1	732
Mlu_00319.mRNA1	0
Mlu_00320.mRNA1	36
Mlu_00321.mRNA1	7
Mlu_00322.mRNA1	254
Mlu_00323.mRNA1	329
Mlu_00324.mRNA1	3288
Mlu_00325.mRNA1	71
Mlu_00326.mRNA1	1428
Mlu_00327.mRNA1	870
Mlu_00328.mRNA1	0
Mlu_00329.mRNA1	596
Mlu_00330.mRNA1	0
Mlu_00331.mRNA1	162
Mlu_00332.mRNA1	0
Mlu_00333.mRNA1	0
Mlu_00334.mRNA1	153
Mlu_00335.mRNA1	0
Mlu_00336.mRNA1	171
Mlu_00337.mRNA1	187
Mlu_00338.mRNA1	0
Mlu_00339.mRNA1	22
Mlu_00340.mRNA1	836
Mlu_00341.mRNA1	6451
Mlu_00342.mRNA1	1259
Mlu_00343.mRNA1	183
Mlu_00344.mRNA1	404
Mlu_00345.mRNA1	40
Mlu_00346.mRNA1	166
Mlu_00347.mRNA1	12
Mlu_00348.mRNA1	235
Mlu_00349.mRNA1	955
Mlu_00350.mRNA1	4
Mlu_00351.mRNA1	2
Mlu_00352.mRNA1	11
Mlu_00353.mRNA1	839
Mlu_00354.mRNA1	6
Mlu_00355.mRNA1	147
Mlu_00356.mRNA1	0
Mlu_00357.mRNA1	1
Mlu_00358.mRNA1	30
Mlu_00359.mRNA1	468
Mlu_00360.mRNA1	1
Mlu_00361.mRNA1	21
Mlu_00362.mRNA1	1890
Mlu_00363.mRNA1	91
Mlu_00364.mRNA1	384
Mlu_00365.mRNA1	191
Mlu_00366.mRNA1	4
Mlu_00367.mRNA1	403
Mlu_00368.mRNA1	1236
Mlu_00369.mRNA1	712
Mlu_00370.mRNA1	894
Mlu_00371.mRNA1	0
Mlu_00372.mRNA1	720
Mlu_00373.mRNA1	272
Mlu_00374.mRNA1	13
Mlu_00375.mRNA1	1503
Mlu_00376.mRNA1	42
Mlu_00377.mRNA1	284
Mlu_00378.mRNA1	322
Mlu_00379.mRNA1	1868
Mlu_00380.mRNA1	398
Mlu_00381.mRNA1	956
Mlu_00382.mRNA1	24
Mlu_00383.mRNA1	130
Mlu_00384.mRNA1	0
Mlu_00385.mRNA1	13
Mlu_00386.mRNA1	21
Mlu_00387.mRNA1	446
Mlu_00388.mRNA1	0
Mlu_00389.mRNA1	172
Mlu_00390.mRNA1	12
Mlu_00391.mRNA1	469
Mlu_00392.mRNA1	103
Mlu_00393.mRNA1	299
Mlu_00394.mRNA1	1396
Mlu_00395.mRNA1	451
Mlu_00396.mRNA1	220
Mlu_00397.mRNA1	434
Mlu_00398.mRNA1	185
Mlu_00399.mRNA1	486
Mlu_00400.mRNA1	96
Mlu_00401.mRNA1	243
Mlu_00402.mRNA1	14
Mlu_00403.mRNA1	252
Mlu_00404.mRNA1	6
Mlu_00405.mRNA1	1184
Mlu_00406.mRNA1	672
Mlu_00407.mRNA1	15
Mlu_00408.mRNA1	126
Mlu_00409.mRNA1	0
Mlu_00410.mRNA1	115
Mlu_00411.mRNA1	513
Mlu_00412.mRNA1	2645
Mlu_00413.mRNA1	0
Mlu_00414.mRNA1	185
Mlu_00415.mRNA1	1
Mlu_00416.mRNA1	324
Mlu_00417.mRNA1	140
Mlu_00418.mRNA1	190
Mlu_00419.mRNA1	592
Mlu_00420.mRNA1	376
Mlu_00421.mRNA1	96
Mlu_00422.mRNA1	7
Mlu_00423.mRNA1	442
Mlu_00424.mRNA1	76
Mlu_00425.mRNA1	3
Mlu_00426.mRNA1	62
Mlu_00427.mRNA1	1
Mlu_00428.mRNA1	11
Mlu_00429.mRNA1	65
Mlu_00430.mRNA1	449
Mlu_00431.mRNA1	0
Mlu_00432.mRNA1	187
Mlu_00433.mRNA1	67
Mlu_00434.mRNA1	84
Mlu_00435.mRNA1	230
Mlu_00436.mRNA1	1493
Mlu_00437.mRNA1	78
Mlu_00438.mRNA1	8
Mlu_00439.mRNA1	40
Mlu_00440.mRNA1	599
Mlu_00441.mRNA1	706
Mlu_00442.mRNA1	71
Mlu_00443.mRNA1	110
Mlu_00444.mRNA1	321
Mlu_00445.mRNA1	0
Mlu_00446.mRNA1	0
Mlu_00447.mRNA1	1
Mlu_00448.mRNA1	7413
Mlu_00449.mRNA1	0
Mlu_00450.mRNA1	4
Mlu_00451.mRNA1	2091
Mlu_00452.mRNA1	13
Mlu_00453.mRNA1	1843
Mlu_00454.mRNA1	315
Mlu_00455.mRNA1	421
Mlu_00456.mRNA1	397
Mlu_00457.mRNA1	2
Mlu_00458.mRNA1	1
Mlu_00459.mRNA1	174
Mlu_00460.mRNA1	22
Mlu_00461.mRNA1	463
Mlu_00462.mRNA1	25
Mlu_00463.mRNA1	331
Mlu_00464.mRNA1	20
Mlu_00465.mRNA1	559
Mlu_00466.mRNA1	1
Mlu_00467.mRNA1	69
Mlu_00468.mRNA1	235
Mlu_00469.mRNA1	280
Mlu_00470.mRNA1	474
Mlu_00471.mRNA1	481
Mlu_00472.mRNA1	29
Mlu_00473.mRNA1	691
Mlu_00474.mRNA1	38
Mlu_00475.mRNA1	331
Mlu_00476.mRNA1	10436
Mlu_00477.mRNA1	109
Mlu_00478.mRNA1	0
Mlu_00479.mRNA1	0
Mlu_00480.mRNA1	513
Mlu_00481.mRNA1	667
Mlu_00482.mRNA1	4746
Mlu_00483.mRNA1	76
Mlu_00484.mRNA1	803
Mlu_00485.mRNA1	0
Mlu_00486.mRNA1	286
Mlu_00487.mRNA1	196
Mlu_00488.mRNA1	4748
Mlu_00489.mRNA1	1191
Mlu_00490.mRNA1	231
Mlu_00491.mRNA1	380
Mlu_00492.mRNA1	224
Mlu_00493.mRNA1	2069
Mlu_00494.mRNA1	218
Mlu_00495.mRNA1	0
Mlu_00496.mRNA1	0
Mlu_00497.mRNA1	154
Mlu_00498.mRNA1	0
Mlu_00499.mRNA1	140
Mlu_00500.mRNA1	23
Mlu_00501.mRNA1	269
Mlu_00502.mRNA1	10
Mlu_00503.mRNA1	699
Mlu_00504.mRNA1	112
Mlu_00505.mRNA1	0
Mlu_00506.mRNA1	0
Mlu_00507.mRNA1	47
Mlu_00508.mRNA1	0
Mlu_00509.mRNA1	487
Mlu_00510.mRNA1	594
Mlu_00511.mRNA1	95
Mlu_00512.mRNA1	743
Mlu_00513.mRNA1	0
Mlu_00514.mRNA1	1270
Mlu_00515.mRNA1	1758
Mlu_00516.mRNA1	119
Mlu_00517.mRNA1	1
Mlu_00518.mRNA1	5
Mlu_00519.mRNA1	544
Mlu_00520.mRNA1	44
Mlu_00521.mRNA1	738
Mlu_00522.mRNA1	193
Mlu_00523.mRNA1	115
Mlu_00524.mRNA1	4
Mlu_00525.mRNA1	2584
Mlu_00526.mRNA1	1
Mlu_00527.mRNA1	1
Mlu_00528.mRNA1	108
Mlu_00529.mRNA1	272
Mlu_00530.mRNA1	0
Mlu_00531.mRNA1	0
Mlu_00532.mRNA1	4
Mlu_00533.mRNA1	114
Mlu_00534.mRNA1	740
Mlu_00535.mRNA1	49
Mlu_00536.mRNA1	59
Mlu_00537.mRNA1	49
Mlu_00538.mRNA1	1894
Mlu_00539.mRNA1	347
Mlu_00540.mRNA1	0
Mlu_00541.mRNA1	39
Mlu_00542.mRNA1	17
Mlu_00543.mRNA1	309
Mlu_00544.mRNA1	745
Mlu_00545.mRNA1	7
Mlu_00546.mRNA1	3
Mlu_00547.mRNA1	17
Mlu_00548.mRNA1	0
Mlu_00549.mRNA1	0
Mlu_00550.mRNA1	91
Mlu_00551.mRNA1	505
Mlu_00552.mRNA1	4257
Mlu_00553.mRNA1	8
Mlu_00554.mRNA1	1011
Mlu_00555.mRNA1	19
Mlu_00556.mRNA1	0
Mlu_00557.mRNA1	6
Mlu_00558.mRNA1	40
Mlu_00559.mRNA1	0
Mlu_00560.mRNA1	281
Mlu_00561.mRNA1	245
Mlu_00562.mRNA1	3907
Mlu_00563.mRNA1	16
Mlu_00564.mRNA1	0
Mlu_00565.mRNA1	0
Mlu_00566.mRNA1	44
Mlu_00567.mRNA1	118
Mlu_00568.mRNA1	92
Mlu_00569.mRNA1	113
Mlu_00570.mRNA1	107
Mlu_00571.mRNA1	870
Mlu_00572.mRNA1	327
Mlu_00573.mRNA1	57
Mlu_00574.mRNA1	291
Mlu_00575.mRNA1	145
Mlu_00576.mRNA1	2
Mlu_00577.mRNA1	152
Mlu_00578.mRNA1	1429
Mlu_00579.mRNA1	443
Mlu_00580.mRNA1	107
Mlu_00581.mRNA1	540
Mlu_00582.mRNA1	1
Mlu_00583.mRNA1	151
Mlu_00584.mRNA1	458
Mlu_00585.mRNA1	86
Mlu_00586.mRNA1	213
Mlu_00587.mRNA1	1494
Mlu_00588.mRNA1	1
Mlu_00589.mRNA1	4
Mlu_00590.mRNA1	32
Mlu_00591.mRNA1	6701
Mlu_00592.mRNA1	28
Mlu_00593.mRNA1	42
Mlu_00594.mRNA1	1075
Mlu_00595.mRNA1	44
Mlu_00596.mRNA1	4
Mlu_00597.mRNA1	0
Mlu_00598.mRNA1	14
Mlu_00599.mRNA1	96
Mlu_00600.mRNA1	1477
Mlu_00601.mRNA1	7022
Mlu_00602.mRNA1	0
Mlu_00603.mRNA1	983
Mlu_00604.mRNA1	0
Mlu_00605.mRNA1	825
Mlu_00606.mRNA1	94
Mlu_00607.mRNA1	11
Mlu_00608.mRNA1	961
Mlu_00609.mRNA1	87
Mlu_00610.mRNA1	89
Mlu_00611.mRNA1	0
Mlu_00612.mRNA1	6
Mlu_00613.mRNA1	57
Mlu_00614.mRNA1	2849
Mlu_00615.mRNA1	1028
Mlu_00616.mRNA1	0
Mlu_00617.mRNA1	495
Mlu_00618.mRNA1	2
Mlu_00619.mRNA1	1
Mlu_00620.mRNA1	1978
Mlu_00621.mRNA1	965
Mlu_00622.mRNA1	1662
Mlu_00623.mRNA1	29
Mlu_00624.mRNA1	2237
Mlu_00625.mRNA1	11
Mlu_00626.mRNA1	24
Mlu_00627.mRNA1	1775
Mlu_00628.mRNA1	0
Mlu_00629.mRNA1	0
Mlu_00630.mRNA1	9
Mlu_00631.mRNA1	389
Mlu_00632.mRNA1	178
Mlu_00633.mRNA1	34
Mlu_00634.mRNA1	0
Mlu_00635.mRNA1	846
Mlu_00636.mRNA1	524
Mlu_00637.mRNA1	178
Mlu_00638.mRNA1	1014
Mlu_00639.mRNA1	9
Mlu_00640.mRNA1	286
Mlu_00641.mRNA1	3
Mlu_00642.mRNA1	173
Mlu_00643.mRNA1	38
Mlu_00644.mRNA1	392
Mlu_00645.mRNA1	78
Mlu_00646.mRNA1	583
Mlu_00647.mRNA1	491
Mlu_00648.mRNA1	241
Mlu_00649.mRNA1	1239
Mlu_00650.mRNA1	287
Mlu_00651.mRNA1	431
Mlu_00652.mRNA1	850
Mlu_00653.mRNA1	284
Mlu_00654.mRNA1	0
Mlu_00655.mRNA1	0
Mlu_00656.mRNA1	99
Mlu_00657.mRNA1	0
Mlu_00658.mRNA1	2
Mlu_00659.mRNA1	4599
Mlu_00660.mRNA1	16
Mlu_00661.mRNA1	48
Mlu_00662.mRNA1	151
Mlu_00663.mRNA1	1
Mlu_00664.mRNA1	41
Mlu_00665.mRNA1	0
Mlu_00666.mRNA1	31
Mlu_00667.mRNA1	92
Mlu_00668.mRNA1	1
Mlu_00669.mRNA1	1
Mlu_00670.mRNA1	2
Mlu_00671.mRNA1	186
Mlu_00672.mRNA1	28
Mlu_00673.mRNA1	0
Mlu_00674.mRNA1	6
Mlu_00675.mRNA1	3
Mlu_00676.mRNA1	333
Mlu_00677.mRNA1	145
Mlu_00678.mRNA1	2
Mlu_00679.mRNA1	488
Mlu_00680.mRNA1	711
Mlu_00681.mRNA1	85
Mlu_00682.mRNA1	482
Mlu_00683.mRNA1	1100
Mlu_00684.mRNA1	0
Mlu_00685.mRNA1	51
Mlu_00686.mRNA1	1476
Mlu_00687.mRNA1	2186
Mlu_00688.mRNA1	129
Mlu_00689.mRNA1	8
Mlu_00690.mRNA1	0
Mlu_00691.mRNA1	0
Mlu_00692.mRNA1	0
Mlu_00693.mRNA1	0
Mlu_00694.mRNA1	181
Mlu_00695.mRNA1	393
Mlu_00696.mRNA1	266
Mlu_00697.mRNA1	0
Mlu_00698.mRNA1	200
Mlu_00699.mRNA1	1
Mlu_00700.mRNA1	102
Mlu_00701.mRNA1	104
Mlu_00702.mRNA1	0
Mlu_00703.mRNA1	28
Mlu_00704.mRNA1	1737
Mlu_00705.mRNA1	330
Mlu_00706.mRNA1	1053
Mlu_00707.mRNA1	33
Mlu_00708.mRNA1	184
Mlu_00709.mRNA1	257
Mlu_00710.mRNA1	40
Mlu_00711.mRNA1	4
Mlu_00712.mRNA1	43
Mlu_00713.mRNA1	573
Mlu_00714.mRNA1	574
Mlu_00715.mRNA1	7
Mlu_00716.mRNA1	349
Mlu_00717.mRNA1	36
Mlu_00718.mRNA1	98
Mlu_00719.mRNA1	108
Mlu_00720.mRNA1	24
Mlu_00721.mRNA1	311
Mlu_00722.mRNA1	4337
Mlu_00723.mRNA1	3
Mlu_00724.mRNA1	133
Mlu_00725.mRNA1	2371
Mlu_00726.mRNA1	0
Mlu_00727.mRNA1	44
Mlu_00728.mRNA1	0
Mlu_00729.mRNA1	1
Mlu_00730.mRNA1	65
Mlu_00731.mRNA1	1525
Mlu_00732.mRNA1	7
Mlu_00733.mRNA1	41
Mlu_00734.mRNA1	50
Mlu_00735.mRNA1	0
Mlu_00736.mRNA1	240
Mlu_00737.mRNA1	1024
Mlu_00738.mRNA1	912
Mlu_00739.mRNA1	471
Mlu_00740.mRNA1	0
Mlu_00741.mRNA1	0
Mlu_00742.mRNA1	0
Mlu_00743.mRNA1	592
Mlu_00744.mRNA1	112
Mlu_00745.mRNA1	469
Mlu_00746.mRNA1	63
Mlu_00747.mRNA1	94
Mlu_00748.mRNA1	2
Mlu_00749.mRNA1	1
Mlu_00750.mRNA1	1
Mlu_00751.mRNA1	0
Mlu_00752.mRNA1	0
Mlu_00753.mRNA1	1868
Mlu_00754.mRNA1	0
Mlu_00755.mRNA1	185
Mlu_00756.mRNA1	329
Mlu_00757.mRNA1	53
Mlu_00758.mRNA1	206
Mlu_00759.mRNA1	187
Mlu_00760.mRNA1	1076
Mlu_00761.mRNA1	480
Mlu_00762.mRNA1	1
Mlu_00763.mRNA1	45
Mlu_00764.mRNA1	85
Mlu_00765.mRNA1	5119
Mlu_00766.mRNA1	2575
Mlu_00767.mRNA1	390
Mlu_00768.mRNA1	526
Mlu_00769.mRNA1	0
Mlu_00770.mRNA1	1349
Mlu_00771.mRNA1	756
Mlu_00772.mRNA1	101
Mlu_00773.mRNA1	3
Mlu_00774.mRNA1	1
Mlu_00775.mRNA1	451
Mlu_00776.mRNA1	2
Mlu_00777.mRNA1	167
Mlu_00778.mRNA1	122
Mlu_00779.mRNA1	832
Mlu_00780.mRNA1	802
Mlu_00781.mRNA1	1
Mlu_00782.mRNA1	0
Mlu_00783.mRNA1	661
Mlu_00784.mRNA1	959
Mlu_00785.mRNA1	0
Mlu_00786.mRNA1	0
Mlu_00787.mRNA1	0
Mlu_00788.mRNA1	8
Mlu_00789.mRNA1	531
Mlu_00790.mRNA1	2
Mlu_00791.mRNA1	0
Mlu_00792.mRNA1	36
Mlu_00793.mRNA1	234
Mlu_00794.mRNA1	0
Mlu_00795.mRNA1	0
Mlu_00796.mRNA1	424
Mlu_00797.mRNA1	0
Mlu_00798.mRNA1	2439
Mlu_00799.mRNA1	58
Mlu_00800.mRNA1	0
Mlu_00801.mRNA1	0
Mlu_00802.mRNA1	350
Mlu_00803.mRNA1	32
Mlu_00804.mRNA1	1983
Mlu_00805.mRNA1	483
Mlu_00806.mRNA1	121
Mlu_00807.mRNA1	1465
Mlu_00808.mRNA1	238
Mlu_00809.mRNA1	627
Mlu_00810.mRNA1	187
Mlu_00811.mRNA1	959
Mlu_00812.mRNA1	2
Mlu_00813.mRNA1	0
Mlu_00814.mRNA1	1409
Mlu_00815.mRNA1	817
Mlu_00816.mRNA1	54
Mlu_00817.mRNA1	893
Mlu_00818.mRNA1	2365
Mlu_00819.mRNA1	71
Mlu_00820.mRNA1	11
Mlu_00821.mRNA1	158
Mlu_00822.mRNA1	41
Mlu_00823.mRNA1	329
Mlu_00824.mRNA1	463
Mlu_00825.mRNA1	44
Mlu_00826.mRNA1	1420
Mlu_00827.mRNA1	187
Mlu_00828.mRNA1	1286
Mlu_00829.mRNA1	1634
Mlu_00830.mRNA1	9
Mlu_00831.mRNA1	63
Mlu_00832.mRNA1	68
Mlu_00833.mRNA1	1161
Mlu_00834.mRNA1	366
Mlu_00835.mRNA1	331
Mlu_00836.mRNA1	26
Mlu_00837.mRNA1	1
Mlu_00838.mRNA1	457
Mlu_00839.mRNA1	0
Mlu_00840.mRNA1	32
Mlu_00841.mRNA1	87
Mlu_00842.mRNA1	895
Mlu_00843.mRNA1	2
Mlu_00844.mRNA1	0
Mlu_00845.mRNA1	27
Mlu_00846.mRNA1	30
Mlu_00847.mRNA1	698
Mlu_00848.mRNA1	0
Mlu_00849.mRNA1	0
Mlu_00850.mRNA1	88
Mlu_00851.mRNA1	11
Mlu_00852.mRNA1	4
Mlu_00853.mRNA1	0
Mlu_00854.mRNA1	46
Mlu_00855.mRNA1	81
Mlu_00856.mRNA1	119
Mlu_00857.mRNA1	32
Mlu_00858.mRNA1	182
Mlu_00859.mRNA1	1
Mlu_00860.mRNA1	274
Mlu_00861.mRNA1	199
Mlu_00862.mRNA1	18
Mlu_00863.mRNA1	0
Mlu_00864.mRNA1	379
Mlu_00865.mRNA1	387
Mlu_00866.mRNA1	187
Mlu_00867.mRNA1	1462
Mlu_00868.mRNA1	132
Mlu_00869.mRNA1	196
Mlu_00870.mRNA1	0
Mlu_00871.mRNA1	55
Mlu_00872.mRNA1	2
Mlu_00873.mRNA1	3363
Mlu_00874.mRNA1	1
Mlu_00875.mRNA1	494
Mlu_00876.mRNA1	1
Mlu_00877.mRNA1	276
Mlu_00878.mRNA1	2521
Mlu_00879.mRNA1	3071
Mlu_00880.mRNA1	68
Mlu_00881.mRNA1	181
Mlu_00882.mRNA1	87
Mlu_00883.mRNA1	317
Mlu_00884.mRNA1	115
Mlu_00885.mRNA1	351
Mlu_00886.mRNA1	1054
Mlu_00887.mRNA1	63
Mlu_00888.mRNA1	20
Mlu_00889.mRNA1	84
Mlu_00890.mRNA1	0
Mlu_00891.mRNA1	188
Mlu_00892.mRNA1	324
Mlu_00893.mRNA1	473
Mlu_00894.mRNA1	634
Mlu_00895.mRNA1	572
Mlu_00896.mRNA1	0
Mlu_00897.mRNA1	167
Mlu_00898.mRNA1	0
Mlu_00899.mRNA1	100
Mlu_00900.mRNA1	30
Mlu_00901.mRNA1	749
Mlu_00902.mRNA1	0
Mlu_00903.mRNA1	317
Mlu_00904.mRNA1	0
Mlu_00905.mRNA1	880
Mlu_00906.mRNA1	14
Mlu_00907.mRNA1	1
Mlu_00908.mRNA1	0
Mlu_00909.mRNA1	24
Mlu_00910.mRNA1	0
Mlu_00911.mRNA1	44
Mlu_00912.mRNA1	40
Mlu_00913.mRNA1	209
Mlu_00914.mRNA1	372
Mlu_00915.mRNA1	0
Mlu_00916.mRNA1	225
Mlu_00917.mRNA1	0
Mlu_00918.mRNA1	1
Mlu_00919.mRNA1	11
Mlu_00920.mRNA1	0
Mlu_00921.mRNA1	4
Mlu_00922.mRNA1	2030
Mlu_00923.mRNA1	1924
Mlu_00924.mRNA1	244
Mlu_00925.mRNA1	498
Mlu_00926.mRNA1	0
Mlu_00927.mRNA1	544
Mlu_00928.mRNA1	126
Mlu_00929.mRNA1	0
Mlu_00930.mRNA1	0
Mlu_00931.mRNA1	0
Mlu_00932.mRNA1	0
Mlu_00933.mRNA1	0
Mlu_00934.mRNA1	292
Mlu_00935.mRNA1	0
Mlu_00936.mRNA1	3
Mlu_00937.mRNA1	1
Mlu_00938.mRNA1	2
Mlu_00939.mRNA1	0
Mlu_00940.mRNA1	153
Mlu_00941.mRNA1	590
Mlu_00942.mRNA1	672
Mlu_00943.mRNA1	2403
Mlu_00944.mRNA1	284
Mlu_00945.mRNA1	79
Mlu_00946.mRNA1	600
Mlu_00947.mRNA1	818
Mlu_00948.mRNA1	40
Mlu_00949.mRNA1	2205
Mlu_00950.mRNA1	4
Mlu_00951.mRNA1	688
Mlu_00952.mRNA1	2
Mlu_00953.mRNA1	4
Mlu_00954.mRNA1	29
Mlu_00955.mRNA1	5601
Mlu_00956.mRNA1	107
Mlu_00957.mRNA1	11
Mlu_00958.mRNA1	0
Mlu_00959.mRNA1	0
Mlu_00960.mRNA1	158
Mlu_00961.mRNA1	1010
Mlu_00962.mRNA1	214
Mlu_00963.mRNA1	461
Mlu_00964.mRNA1	37
Mlu_00965.mRNA1	78
Mlu_00966.mRNA1	1442
Mlu_00967.mRNA1	215
Mlu_00968.mRNA1	60
Mlu_00969.mRNA1	81
Mlu_00970.mRNA1	26
Mlu_00971.mRNA1	1285
Mlu_00972.mRNA1	471
Mlu_00973.mRNA1	185
Mlu_00974.mRNA1	91
Mlu_00975.mRNA1	7
Mlu_00976.mRNA1	326
Mlu_00977.mRNA1	888
Mlu_00978.mRNA1	970
Mlu_00979.mRNA1	35
Mlu_00980.mRNA1	4
Mlu_00981.mRNA1	2
Mlu_00982.mRNA1	2
Mlu_00983.mRNA1	19
Mlu_00984.mRNA1	45
Mlu_00985.mRNA1	7
Mlu_00986.mRNA1	324
Mlu_00987.mRNA1	65
Mlu_00988.mRNA1	0
Mlu_00989.mRNA1	17
Mlu_00990.mRNA1	14
Mlu_00991.mRNA1	32
Mlu_00992.mRNA1	15
Mlu_00993.mRNA1	9
Mlu_00994.mRNA1	137
Mlu_00995.mRNA1	3894
Mlu_00996.mRNA1	301
Mlu_00997.mRNA1	0
Mlu_00998.mRNA1	131
Mlu_00999.mRNA1	382
Mlu_01000.mRNA1	1
Mlu_01001.mRNA1	0
Mlu_01002.mRNA1	356
Mlu_01003.mRNA1	400
Mlu_01004.mRNA1	3
Mlu_01005.mRNA1	6
Mlu_01006.mRNA1	15215
Mlu_01007.mRNA1	8833
Mlu_01008.mRNA1	246
Mlu_01009.mRNA1	248
Mlu_01010.mRNA1	732
Mlu_01011.mRNA1	10
Mlu_01012.mRNA1	160
Mlu_01013.mRNA1	587
Mlu_01014.mRNA1	319
Mlu_01015.mRNA1	0
Mlu_01016.mRNA1	4661
Mlu_01017.mRNA1	17
Mlu_01018.mRNA1	776
Mlu_01019.mRNA1	2274
Mlu_01020.mRNA1	167
Mlu_01021.mRNA1	367
Mlu_01022.mRNA1	831
Mlu_01023.mRNA1	1062
Mlu_01024.mRNA1	25
Mlu_01025.mRNA1	135
Mlu_01026.mRNA1	135
Mlu_01027.mRNA1	345
Mlu_01028.mRNA1	1076
Mlu_01029.mRNA1	276
Mlu_01030.mRNA1	1531
Mlu_01031.mRNA1	62
Mlu_01032.mRNA1	1194
Mlu_01033.mRNA1	589
Mlu_01034.mRNA1	104
Mlu_01035.mRNA1	238
Mlu_01036.mRNA1	3238
Mlu_01037.mRNA1	0
Mlu_01038.mRNA1	323
Mlu_01039.mRNA1	0
Mlu_01040.mRNA1	2
Mlu_01041.mRNA1	1
Mlu_01042.mRNA1	0
Mlu_01043.mRNA1	90
Mlu_01044.mRNA1	156
Mlu_01045.mRNA1	88
Mlu_01046.mRNA1	3
Mlu_01047.mRNA1	50
Mlu_01048.mRNA1	0
Mlu_01049.mRNA1	2489
Mlu_01050.mRNA1	444
Mlu_01051.mRNA1	0
Mlu_01052.mRNA1	0
Mlu_01053.mRNA1	585
Mlu_01054.mRNA1	69
Mlu_01055.mRNA1	851
Mlu_01056.mRNA1	3224
Mlu_01057.mRNA1	1290
Mlu_01058.mRNA1	2328
Mlu_01059.mRNA1	51
Mlu_01060.mRNA1	186
Mlu_01061.mRNA1	0
Mlu_01062.mRNA1	33
Mlu_01063.mRNA1	0
Mlu_01064.mRNA1	913
Mlu_01065.mRNA1	0
Mlu_01066.mRNA1	0
Mlu_01067.mRNA1	17
Mlu_01068.mRNA1	138
Mlu_01069.mRNA1	33
Mlu_01070.mRNA1	60
Mlu_01071.mRNA1	267
Mlu_01072.mRNA1	508
Mlu_01073.mRNA1	0
Mlu_01074.mRNA1	0
Mlu_01075.mRNA1	421
Mlu_01076.mRNA1	95
Mlu_01077.mRNA1	120
Mlu_01078.mRNA1	24
Mlu_01079.mRNA1	45
Mlu_01080.mRNA1	0
Mlu_01081.mRNA1	0
Mlu_01082.mRNA1	0
Mlu_01083.mRNA1	0
Mlu_01084.mRNA1	0
Mlu_01085.mRNA1	0
Mlu_01086.mRNA1	29
Mlu_01087.mRNA1	0
Mlu_01088.mRNA1	2618
Mlu_01089.mRNA1	3307
Mlu_01090.mRNA1	2383
Mlu_01091.mRNA1	457
Mlu_01092.mRNA1	50
Mlu_01093.mRNA1	376
Mlu_01094.mRNA1	2
Mlu_01095.mRNA1	6871
Mlu_01096.mRNA1	230
Mlu_01097.mRNA1	0
Mlu_01098.mRNA1	0
Mlu_01099.mRNA1	338
Mlu_01100.mRNA1	0
Mlu_01101.mRNA1	704
Mlu_01102.mRNA1	195
Mlu_01103.mRNA1	18
Mlu_01104.mRNA1	11
Mlu_01105.mRNA1	0
Mlu_01106.mRNA1	486
Mlu_01107.mRNA1	0
Mlu_01108.mRNA1	0
Mlu_01109.mRNA1	0
Mlu_01110.mRNA1	248
Mlu_01111.mRNA1	18
Mlu_01112.mRNA1	33
Mlu_01113.mRNA1	2553
Mlu_01114.mRNA1	109
Mlu_01115.mRNA1	243
Mlu_01116.mRNA1	564
Mlu_01117.mRNA1	0
Mlu_01118.mRNA1	0
Mlu_01119.mRNA1	0
Mlu_01120.mRNA1	12
Mlu_01121.mRNA1	88
Mlu_01122.mRNA1	0
Mlu_01123.mRNA1	13
Mlu_01124.mRNA1	190
Mlu_01125.mRNA1	90
Mlu_01126.mRNA1	2
Mlu_01127.mRNA1	0
Mlu_01128.mRNA1	0
Mlu_01129.mRNA1	13
Mlu_01130.mRNA1	1
Mlu_01131.mRNA1	2
Mlu_01132.mRNA1	1
Mlu_01133.mRNA1	14
Mlu_01134.mRNA1	353
Mlu_01135.mRNA1	0
Mlu_01136.mRNA1	108
Mlu_01137.mRNA1	0
Mlu_01138.mRNA1	325
Mlu_01139.mRNA1	56
Mlu_01140.mRNA1	0
Mlu_01141.mRNA1	6
Mlu_01142.mRNA1	1827
Mlu_01143.mRNA1	294
Mlu_01144.mRNA1	19
Mlu_01145.mRNA1	42
Mlu_01146.mRNA1	7
Mlu_01147.mRNA1	30
Mlu_01148.mRNA1	498
Mlu_01149.mRNA1	1161
Mlu_01150.mRNA1	1
Mlu_01151.mRNA1	1
Mlu_01152.mRNA1	10
Mlu_01153.mRNA1	90
Mlu_01154.mRNA1	0
Mlu_01155.mRNA1	977
Mlu_01156.mRNA1	226
Mlu_01157.mRNA1	281
Mlu_01158.mRNA1	19
Mlu_01159.mRNA1	60
Mlu_01160.mRNA1	487
Mlu_01161.mRNA1	0
Mlu_01162.mRNA1	0
Mlu_01163.mRNA1	0
Mlu_01164.mRNA1	443
Mlu_01165.mRNA1	28
Mlu_01166.mRNA1	7
Mlu_01167.mRNA1	39
Mlu_01168.mRNA1	66
Mlu_01169.mRNA1	221
Mlu_01170.mRNA1	197
Mlu_01171.mRNA1	750
Mlu_01172.mRNA1	413
Mlu_01173.mRNA1	411
Mlu_01174.mRNA1	1
Mlu_01175.mRNA1	0
Mlu_01176.mRNA1	38
Mlu_01177.mRNA1	3
Mlu_01178.mRNA1	168
Mlu_01179.mRNA1	2
Mlu_01180.mRNA1	0
Mlu_01181.mRNA1	0
Mlu_01182.mRNA1	2
Mlu_01183.mRNA1	0
Mlu_01184.mRNA1	1
Mlu_01185.mRNA1	345
Mlu_01186.mRNA1	54
Mlu_01187.mRNA1	133
Mlu_01188.mRNA1	20
Mlu_01189.mRNA1	406
Mlu_01190.mRNA1	1
Mlu_01191.mRNA1	0
Mlu_01192.mRNA1	110
Mlu_01193.mRNA1	1727
Mlu_01194.mRNA1	731
Mlu_01195.mRNA1	6
Mlu_01196.mRNA1	1
Mlu_01197.mRNA1	71
Mlu_01198.mRNA1	37
Mlu_01199.mRNA1	656
Mlu_01200.mRNA1	200
Mlu_01201.mRNA1	386
Mlu_01202.mRNA1	416
Mlu_01203.mRNA1	5
Mlu_01204.mRNA1	117
Mlu_01205.mRNA1	113
Mlu_01206.mRNA1	29
Mlu_01207.mRNA1	3
Mlu_01208.mRNA1	1
Mlu_01209.mRNA1	46
Mlu_01210.mRNA1	28
Mlu_01211.mRNA1	3728
Mlu_01212.mRNA1	1054
Mlu_01213.mRNA1	53
Mlu_01214.mRNA1	209
Mlu_01215.mRNA1	1
Mlu_01216.mRNA1	0
Mlu_01217.mRNA1	0
Mlu_01218.mRNA1	0
Mlu_01219.mRNA1	0
Mlu_01220.mRNA1	2
Mlu_01221.mRNA1	0
Mlu_01222.mRNA1	0
Mlu_01223.mRNA1	2
Mlu_01224.mRNA1	0
Mlu_01225.mRNA1	110
Mlu_01226.mRNA1	158
Mlu_01227.mRNA1	525
Mlu_01228.mRNA1	0
Mlu_01229.mRNA1	0
Mlu_01230.mRNA1	10
Mlu_01231.mRNA1	16
Mlu_01232.mRNA1	297
Mlu_01233.mRNA1	0
Mlu_01234.mRNA1	11
Mlu_01235.mRNA1	0
Mlu_01236.mRNA1	202
Mlu_01237.mRNA1	967
Mlu_01238.mRNA1	36
Mlu_01239.mRNA1	75
Mlu_01240.mRNA1	508
Mlu_01241.mRNA1	422
Mlu_01242.mRNA1	170
Mlu_01243.mRNA1	528
Mlu_01244.mRNA1	404
Mlu_01245.mRNA1	618
Mlu_01246.mRNA1	9
Mlu_01247.mRNA1	1314
Mlu_01248.mRNA1	4
Mlu_01249.mRNA1	270
Mlu_01250.mRNA1	171
Mlu_01251.mRNA1	10
Mlu_01252.mRNA1	12
Mlu_01253.mRNA1	354
Mlu_01254.mRNA1	169
Mlu_01255.mRNA1	0
Mlu_01256.mRNA1	5
Mlu_01257.mRNA1	123
Mlu_01258.mRNA1	908
Mlu_01259.mRNA1	346
Mlu_01260.mRNA1	243
Mlu_01261.mRNA1	37
Mlu_01262.mRNA1	219
Mlu_01263.mRNA1	201
Mlu_01264.mRNA1	315
Mlu_01265.mRNA1	219
Mlu_01266.mRNA1	76
Mlu_01267.mRNA1	19
Mlu_01268.mRNA1	380
Mlu_01269.mRNA1	648
Mlu_01270.mRNA1	0
Mlu_01271.mRNA1	2
Mlu_01272.mRNA1	327
Mlu_01273.mRNA1	218
Mlu_01274.mRNA1	4
Mlu_01275.mRNA1	81
Mlu_01276.mRNA1	55
Mlu_01277.mRNA1	234
Mlu_01278.mRNA1	0
Mlu_01279.mRNA1	0
Mlu_01280.mRNA1	0
Mlu_01281.mRNA1	0
Mlu_01282.mRNA1	247
Mlu_01283.mRNA1	422
Mlu_01284.mRNA1	0
Mlu_01285.mRNA1	0
Mlu_01286.mRNA1	31
Mlu_01287.mRNA1	211
Mlu_01288.mRNA1	0
Mlu_01289.mRNA1	193
Mlu_01290.mRNA1	652
Mlu_01291.mRNA1	128
Mlu_01292.mRNA1	1
Mlu_01293.mRNA1	0
Mlu_01294.mRNA1	0
Mlu_01295.mRNA1	2
Mlu_01296.mRNA1	0
Mlu_01297.mRNA1	0
Mlu_01298.mRNA1	701
Mlu_01299.mRNA1	113
Mlu_01300.mRNA1	0
Mlu_01301.mRNA1	0
Mlu_01302.mRNA1	211
Mlu_01303.mRNA1	148
Mlu_01304.mRNA1	0
Mlu_01305.mRNA1	683
Mlu_01306.mRNA1	1493
Mlu_01307.mRNA1	2
Mlu_01308.mRNA1	278
Mlu_01309.mRNA1	625
Mlu_01310.mRNA1	16
Mlu_01311.mRNA1	173
Mlu_01312.mRNA1	899
Mlu_01313.mRNA1	2183
Mlu_01314.mRNA1	17
Mlu_01315.mRNA1	119
Mlu_01316.mRNA1	798
Mlu_01317.mRNA1	285
Mlu_01318.mRNA1	2
Mlu_01319.mRNA1	834
Mlu_01320.mRNA1	4
Mlu_01321.mRNA1	631
Mlu_01322.mRNA1	71
Mlu_01323.mRNA1	0
Mlu_01324.mRNA1	5
Mlu_01325.mRNA1	4
Mlu_01326.mRNA1	25
Mlu_01327.mRNA1	4
Mlu_01328.mRNA1	218
Mlu_01329.mRNA1	16
Mlu_01330.mRNA1	0
Mlu_01331.mRNA1	494
Mlu_01332.mRNA1	1046
Mlu_01333.mRNA1	0
Mlu_01334.mRNA1	158
Mlu_01335.mRNA1	88
Mlu_01336.mRNA1	1
Mlu_01337.mRNA1	0
Mlu_01338.mRNA1	809
Mlu_01339.mRNA1	564
Mlu_01340.mRNA1	2
Mlu_01341.mRNA1	51
Mlu_01342.mRNA1	4137
Mlu_01343.mRNA1	0
Mlu_01344.mRNA1	15
Mlu_01345.mRNA1	885
Mlu_01346.mRNA1	17
Mlu_01347.mRNA1	2
Mlu_01348.mRNA1	567
Mlu_01349.mRNA1	0
Mlu_01350.mRNA1	1828
Mlu_01351.mRNA1	18
Mlu_01352.mRNA1	0
Mlu_01353.mRNA1	23008
Mlu_01354.mRNA1	0
Mlu_01355.mRNA1	90
Mlu_01356.mRNA1	20
Mlu_01357.mRNA1	564
Mlu_01358.mRNA1	0
Mlu_01359.mRNA1	1
Mlu_01360.mRNA1	0
Mlu_01361.mRNA1	476
Mlu_01362.mRNA1	0
Mlu_01363.mRNA1	0
Mlu_01364.mRNA1	19
Mlu_01365.mRNA1	146
Mlu_01366.mRNA1	186
Mlu_01367.mRNA1	210
Mlu_01368.mRNA1	1744
Mlu_01369.mRNA1	164
Mlu_01370.mRNA1	166
Mlu_01371.mRNA1	132
Mlu_01372.mRNA1	457
Mlu_01373.mRNA1	294
Mlu_01374.mRNA1	1252
Mlu_01375.mRNA1	321
Mlu_01376.mRNA1	83
Mlu_01377.mRNA1	422
Mlu_01378.mRNA1	994
Mlu_01379.mRNA1	296
Mlu_01380.mRNA1	119
Mlu_01381.mRNA1	49
Mlu_01382.mRNA1	5
Mlu_01383.mRNA1	120
Mlu_01384.mRNA1	949
Mlu_01385.mRNA1	23319
Mlu_01386.mRNA1	0
Mlu_01387.mRNA1	17
Mlu_01388.mRNA1	0
Mlu_01389.mRNA1	0
Mlu_01390.mRNA1	3
Mlu_01391.mRNA1	939
Mlu_01392.mRNA1	685
Mlu_01393.mRNA1	124
Mlu_01394.mRNA1	0
Mlu_01395.mRNA1	343
Mlu_01396.mRNA1	903
Mlu_01397.mRNA1	508
Mlu_01398.mRNA1	3
Mlu_01399.mRNA1	446
Mlu_01400.mRNA1	198
Mlu_01401.mRNA1	119
Mlu_01402.mRNA1	0
Mlu_01403.mRNA1	65
Mlu_01404.mRNA1	6
Mlu_01405.mRNA1	0
Mlu_01406.mRNA1	372
Mlu_01407.mRNA1	11
Mlu_01408.mRNA1	3257
Mlu_01409.mRNA1	17
Mlu_01410.mRNA1	603
Mlu_01411.mRNA1	174
Mlu_01412.mRNA1	1074
Mlu_01413.mRNA1	18
Mlu_01414.mRNA1	718
Mlu_01415.mRNA1	7
Mlu_01416.mRNA1	3210
Mlu_01417.mRNA1	7
Mlu_01418.mRNA1	75
Mlu_01419.mRNA1	101
Mlu_01420.mRNA1	123
Mlu_01421.mRNA1	5
Mlu_01422.mRNA1	0
Mlu_01423.mRNA1	0
Mlu_01424.mRNA1	0
Mlu_01425.mRNA1	698
Mlu_01426.mRNA1	2005
Mlu_01427.mRNA1	703
Mlu_01428.mRNA1	385
Mlu_01429.mRNA1	2
Mlu_01430.mRNA1	254
Mlu_01431.mRNA1	54
Mlu_01432.mRNA1	306
Mlu_01433.mRNA1	9316
Mlu_01434.mRNA1	117
Mlu_01435.mRNA1	0
Mlu_01436.mRNA1	5
Mlu_01437.mRNA1	104
Mlu_01438.mRNA1	616
Mlu_01439.mRNA1	150
Mlu_01440.mRNA1	13
Mlu_01441.mRNA1	199
Mlu_01442.mRNA1	541
Mlu_01443.mRNA1	74
Mlu_01444.mRNA1	1
Mlu_01445.mRNA1	0
Mlu_01446.mRNA1	230
Mlu_01447.mRNA1	125
Mlu_01448.mRNA1	2
Mlu_01449.mRNA1	384
Mlu_01450.mRNA1	9619
Mlu_01451.mRNA1	107
Mlu_01452.mRNA1	121
Mlu_01453.mRNA1	0
Mlu_01454.mRNA1	0
Mlu_01455.mRNA1	744
Mlu_01456.mRNA1	357
Mlu_01457.mRNA1	549
Mlu_01458.mRNA1	0
Mlu_01459.mRNA1	0
Mlu_01460.mRNA1	275
Mlu_01461.mRNA1	1630
Mlu_01462.mRNA1	138
Mlu_01463.mRNA1	8
Mlu_01464.mRNA1	100
Mlu_01465.mRNA1	66
Mlu_01466.mRNA1	902
Mlu_01467.mRNA1	8
Mlu_01468.mRNA1	384
Mlu_01469.mRNA1	2
Mlu_01470.mRNA1	299
Mlu_01471.mRNA1	169
Mlu_01472.mRNA1	1089
Mlu_01473.mRNA1	73
Mlu_01474.mRNA1	207
Mlu_01475.mRNA1	204
Mlu_01476.mRNA1	53
Mlu_01477.mRNA1	1043
Mlu_01478.mRNA1	1892
Mlu_01479.mRNA1	307
Mlu_01480.mRNA1	102
Mlu_01481.mRNA1	831
Mlu_01482.mRNA1	208
Mlu_01483.mRNA1	1980
Mlu_01484.mRNA1	1381
Mlu_01485.mRNA1	504
Mlu_01486.mRNA1	1757
Mlu_01487.mRNA1	0
Mlu_01488.mRNA1	1
Mlu_01489.mRNA1	381
Mlu_01490.mRNA1	51
Mlu_01491.mRNA1	0
Mlu_01492.mRNA1	17
Mlu_01493.mRNA1	2
Mlu_01494.mRNA1	0
Mlu_01495.mRNA1	0
Mlu_01496.mRNA1	0
Mlu_01497.mRNA1	0
Mlu_01498.mRNA1	117
Mlu_01499.mRNA1	174
Mlu_01500.mRNA1	46
Mlu_01501.mRNA1	6
Mlu_01502.mRNA1	0
Mlu_01503.mRNA1	66
Mlu_01504.mRNA1	18
Mlu_01505.mRNA1	3
Mlu_01506.mRNA1	4741
Mlu_01507.mRNA1	484
Mlu_01508.mRNA1	411
Mlu_01509.mRNA1	1
Mlu_01510.mRNA1	245
Mlu_01511.mRNA1	0
Mlu_01512.mRNA1	389
Mlu_01513.mRNA1	627
Mlu_01514.mRNA1	0
Mlu_01515.mRNA1	717
Mlu_01516.mRNA1	679
Mlu_01517.mRNA1	4059
Mlu_01518.mRNA1	0
Mlu_01519.mRNA1	2
Mlu_01520.mRNA1	26
Mlu_01521.mRNA1	15
Mlu_01522.mRNA1	36
Mlu_01523.mRNA1	661
Mlu_01524.mRNA1	630
Mlu_01525.mRNA1	4
Mlu_01526.mRNA1	111
Mlu_01527.mRNA1	108
Mlu_01528.mRNA1	25
Mlu_01529.mRNA1	219
Mlu_01530.mRNA1	24
Mlu_01531.mRNA1	1562
Mlu_01532.mRNA1	11
Mlu_01533.mRNA1	47
Mlu_01534.mRNA1	291
Mlu_01535.mRNA1	597
Mlu_01536.mRNA1	80
Mlu_01537.mRNA1	3113
Mlu_01538.mRNA1	273
Mlu_01539.mRNA1	7
Mlu_01540.mRNA1	0
Mlu_01541.mRNA1	0
Mlu_01542.mRNA1	0
Mlu_01543.mRNA1	1
Mlu_01544.mRNA1	101
Mlu_01545.mRNA1	226
Mlu_01546.mRNA1	438
Mlu_01547.mRNA1	828
Mlu_01548.mRNA1	0
Mlu_01549.mRNA1	105
Mlu_01550.mRNA1	3807
Mlu_01551.mRNA1	261
Mlu_01552.mRNA1	597
Mlu_01553.mRNA1	2
Mlu_01554.mRNA1	1
Mlu_01555.mRNA1	0
Mlu_01556.mRNA1	0
Mlu_01557.mRNA1	607
Mlu_01558.mRNA1	8
Mlu_01559.mRNA1	1440
Mlu_01560.mRNA1	4
Mlu_01561.mRNA1	28
Mlu_01562.mRNA1	4215
Mlu_01563.mRNA1	0
Mlu_01564.mRNA1	27
Mlu_01565.mRNA1	13
Mlu_01566.mRNA1	1921
Mlu_01567.mRNA1	408
Mlu_01568.mRNA1	93
Mlu_01569.mRNA1	122
Mlu_01570.mRNA1	0
Mlu_01571.mRNA1	6
Mlu_01572.mRNA1	233
Mlu_01573.mRNA1	21
Mlu_01574.mRNA1	53
Mlu_01575.mRNA1	1000
Mlu_01576.mRNA1	1
Mlu_01577.mRNA1	2
Mlu_01578.mRNA1	32
Mlu_01579.mRNA1	3
Mlu_01580.mRNA1	273
Mlu_01581.mRNA1	1147
Mlu_01582.mRNA1	0
Mlu_01583.mRNA1	66
Mlu_01584.mRNA1	239
Mlu_01585.mRNA1	1
Mlu_01586.mRNA1	0
Mlu_01587.mRNA1	2
Mlu_01588.mRNA1	3
Mlu_01589.mRNA1	0
Mlu_01590.mRNA1	0
Mlu_01591.mRNA1	0
Mlu_01592.mRNA1	0
Mlu_01593.mRNA1	328
Mlu_01594.mRNA1	1280
Mlu_01595.mRNA1	1
Mlu_01596.mRNA1	75
Mlu_01597.mRNA1	6
Mlu_01598.mRNA1	0
Mlu_01599.mRNA1	556
Mlu_01600.mRNA1	3
Mlu_01601.mRNA1	150
Mlu_01602.mRNA1	185
Mlu_01603.mRNA1	25
Mlu_01604.mRNA1	365
Mlu_01605.mRNA1	563
Mlu_01606.mRNA1	231
Mlu_01607.mRNA1	22
Mlu_01608.mRNA1	1160
Mlu_01609.mRNA1	178
Mlu_01610.mRNA1	131
Mlu_01611.mRNA1	0
Mlu_01612.mRNA1	798
Mlu_01613.mRNA1	0
Mlu_01614.mRNA1	0
Mlu_01615.mRNA1	151
Mlu_01616.mRNA1	6
Mlu_01617.mRNA1	0
Mlu_01618.mRNA1	2264
Mlu_01619.mRNA1	487
Mlu_01620.mRNA1	1219
Mlu_01621.mRNA1	26
Mlu_01622.mRNA1	0
Mlu_01623.mRNA1	1
Mlu_01624.mRNA1	205
Mlu_01625.mRNA1	3
Mlu_01626.mRNA1	663
Mlu_01627.mRNA1	322
Mlu_01628.mRNA1	4
Mlu_01629.mRNA1	1252
Mlu_01630.mRNA1	2
Mlu_01631.mRNA1	0
Mlu_01632.mRNA1	1
Mlu_01633.mRNA1	55
Mlu_01634.mRNA1	80
Mlu_01635.mRNA1	807
Mlu_01636.mRNA1	38
Mlu_01637.mRNA1	0
Mlu_01638.mRNA1	0
Mlu_01639.mRNA1	470
Mlu_01640.mRNA1	1043
Mlu_01641.mRNA1	74
Mlu_01642.mRNA1	58
Mlu_01643.mRNA1	2
Mlu_01644.mRNA1	139
Mlu_01645.mRNA1	189
Mlu_01646.mRNA1	445
Mlu_01647.mRNA1	11
Mlu_01648.mRNA1	10
Mlu_01649.mRNA1	37
Mlu_01650.mRNA1	465
Mlu_01651.mRNA1	0
Mlu_01652.mRNA1	0
Mlu_01653.mRNA1	474
Mlu_01654.mRNA1	4
Mlu_01655.mRNA1	33
Mlu_01656.mRNA1	513
Mlu_01657.mRNA1	1287
Mlu_01658.mRNA1	4736
Mlu_01659.mRNA1	72
Mlu_01660.mRNA1	126
Mlu_01661.mRNA1	58
Mlu_01662.mRNA1	6
Mlu_01663.mRNA1	1474
Mlu_01664.mRNA1	196
Mlu_01665.mRNA1	155
Mlu_01666.mRNA1	0
Mlu_01667.mRNA1	0
Mlu_01668.mRNA1	195
Mlu_01669.mRNA1	0
Mlu_01670.mRNA1	1
Mlu_01671.mRNA1	318
Mlu_01672.mRNA1	287
Mlu_01673.mRNA1	2745
Mlu_01674.mRNA1	151
Mlu_01675.mRNA1	328
Mlu_01676.mRNA1	0
Mlu_01677.mRNA1	1350
Mlu_01678.mRNA1	4838
Mlu_01679.mRNA1	726
Mlu_01680.mRNA1	1
Mlu_01681.mRNA1	2083
Mlu_01682.mRNA1	393
Mlu_01683.mRNA1	27
Mlu_01684.mRNA1	6
Mlu_01685.mRNA1	61
Mlu_01686.mRNA1	229
Mlu_01687.mRNA1	217
Mlu_01688.mRNA1	23
Mlu_01689.mRNA1	521
Mlu_01690.mRNA1	141
Mlu_01691.mRNA1	416
Mlu_01692.mRNA1	170
Mlu_01693.mRNA1	3816
Mlu_01694.mRNA1	179
Mlu_01695.mRNA1	2643
Mlu_01696.mRNA1	1976
Mlu_01697.mRNA1	70
Mlu_01698.mRNA1	475
Mlu_01699.mRNA1	335
Mlu_01700.mRNA1	63
Mlu_01701.mRNA1	1
Mlu_01702.mRNA1	314
Mlu_01703.mRNA1	141
Mlu_01704.mRNA1	1
Mlu_01705.mRNA1	3
Mlu_01706.mRNA1	155
Mlu_01707.mRNA1	0
Mlu_01708.mRNA1	3
Mlu_01709.mRNA1	5
Mlu_01710.mRNA1	951
Mlu_01711.mRNA1	0
Mlu_01712.mRNA1	45
Mlu_01713.mRNA1	4115
Mlu_01714.mRNA1	765
Mlu_01715.mRNA1	6
Mlu_01716.mRNA1	779
Mlu_01717.mRNA1	9
Mlu_01718.mRNA1	90
Mlu_01719.mRNA1	0
Mlu_01720.mRNA1	7
Mlu_01721.mRNA1	116
Mlu_01722.mRNA1	54
Mlu_01723.mRNA1	1
Mlu_01724.mRNA1	17
Mlu_01725.mRNA1	1
Mlu_01726.mRNA1	213
Mlu_01727.mRNA1	51
Mlu_01728.mRNA1	40
Mlu_01729.mRNA1	26
Mlu_01730.mRNA1	46
Mlu_01731.mRNA1	0
Mlu_01732.mRNA1	0
Mlu_01733.mRNA1	2051
Mlu_01734.mRNA1	2460
Mlu_01735.mRNA1	0
Mlu_01736.mRNA1	51
Mlu_01737.mRNA1	0
Mlu_01738.mRNA1	310
Mlu_01739.mRNA1	1
Mlu_01740.mRNA1	0
Mlu_01741.mRNA1	0
Mlu_01742.mRNA1	0
Mlu_01743.mRNA1	41
Mlu_01744.mRNA1	497
Mlu_01745.mRNA1	385
Mlu_01746.mRNA1	70
Mlu_01747.mRNA1	726
Mlu_01748.mRNA1	1916
Mlu_01749.mRNA1	22
Mlu_01750.mRNA1	46
Mlu_01751.mRNA1	140
Mlu_01752.mRNA1	122
Mlu_01753.mRNA1	0
Mlu_01754.mRNA1	645
Mlu_01755.mRNA1	7
Mlu_01756.mRNA1	0
Mlu_01757.mRNA1	1056
Mlu_01758.mRNA1	23
Mlu_01759.mRNA1	359
Mlu_01760.mRNA1	0
Mlu_01761.mRNA1	1
Mlu_01762.mRNA1	1
Mlu_01763.mRNA1	2556
Mlu_01764.mRNA1	163
Mlu_01765.mRNA1	0
Mlu_01766.mRNA1	0
Mlu_01767.mRNA1	450
Mlu_01768.mRNA1	197
Mlu_01769.mRNA1	17
Mlu_01770.mRNA1	34
Mlu_01771.mRNA1	151
Mlu_01772.mRNA1	1901
Mlu_01773.mRNA1	0
Mlu_01774.mRNA1	0
Mlu_01775.mRNA1	0
Mlu_01776.mRNA1	70
Mlu_01777.mRNA1	0
Mlu_01778.mRNA1	0
Mlu_01779.mRNA1	0
Mlu_01780.mRNA1	0
Mlu_01781.mRNA1	0
Mlu_01782.mRNA1	5
Mlu_01783.mRNA1	0
Mlu_01784.mRNA1	0
Mlu_01785.mRNA1	64
Mlu_01786.mRNA1	0
Mlu_01787.mRNA1	60
Mlu_01788.mRNA1	2332
Mlu_01789.mRNA1	1275
Mlu_01790.mRNA1	0
Mlu_01791.mRNA1	1
Mlu_01792.mRNA1	171
Mlu_01793.mRNA1	958
Mlu_01794.mRNA1	4
Mlu_01795.mRNA1	0
Mlu_01796.mRNA1	290
Mlu_01797.mRNA1	130
Mlu_01798.mRNA1	24
Mlu_01799.mRNA1	306
Mlu_01800.mRNA1	7
Mlu_01801.mRNA1	300
Mlu_01802.mRNA1	570
Mlu_01803.mRNA1	242
Mlu_01804.mRNA1	1
Mlu_01805.mRNA1	172
Mlu_01806.mRNA1	422
Mlu_01807.mRNA1	70
Mlu_01808.mRNA1	1
Mlu_01809.mRNA1	0
Mlu_01810.mRNA1	732
Mlu_01811.mRNA1	798
Mlu_01812.mRNA1	1
Mlu_01813.mRNA1	60
Mlu_01814.mRNA1	1
Mlu_01815.mRNA1	15
Mlu_01816.mRNA1	212
Mlu_01817.mRNA1	1
Mlu_01818.mRNA1	315
Mlu_01819.mRNA1	633
Mlu_01820.mRNA1	95
Mlu_01821.mRNA1	12
Mlu_01822.mRNA1	176
Mlu_01823.mRNA1	73
Mlu_01824.mRNA1	7
Mlu_01825.mRNA1	0
Mlu_01826.mRNA1	317
Mlu_01827.mRNA1	203
Mlu_01828.mRNA1	670
Mlu_01829.mRNA1	2
Mlu_01830.mRNA1	0
Mlu_01831.mRNA1	1
Mlu_01832.mRNA1	0
Mlu_01833.mRNA1	138
Mlu_01834.mRNA1	165
Mlu_01835.mRNA1	40
Mlu_01836.mRNA1	32
Mlu_01837.mRNA1	44
Mlu_01838.mRNA1	371
Mlu_01839.mRNA1	23
Mlu_01840.mRNA1	202
Mlu_01841.mRNA1	1359
Mlu_01842.mRNA1	105
Mlu_01843.mRNA1	13
Mlu_01844.mRNA1	0
Mlu_01845.mRNA1	49
Mlu_01846.mRNA1	2786
Mlu_01847.mRNA1	2
Mlu_01848.mRNA1	13
Mlu_01849.mRNA1	47
Mlu_01850.mRNA1	2632
Mlu_01851.mRNA1	110
Mlu_01852.mRNA1	34
Mlu_01853.mRNA1	498
Mlu_01854.mRNA1	908
Mlu_01855.mRNA1	1291
Mlu_01856.mRNA1	11
Mlu_01857.mRNA1	4
Mlu_01858.mRNA1	441
Mlu_01859.mRNA1	1
Mlu_01860.mRNA1	3
Mlu_01861.mRNA1	680
Mlu_01862.mRNA1	177
Mlu_01863.mRNA1	716
Mlu_01864.mRNA1	122
Mlu_01865.mRNA1	15
Mlu_01866.mRNA1	487
Mlu_01867.mRNA1	0
Mlu_01868.mRNA1	0
Mlu_01869.mRNA1	171
Mlu_01870.mRNA1	365
Mlu_01871.mRNA1	199
Mlu_01872.mRNA1	0
Mlu_01873.mRNA1	4
Mlu_01874.mRNA1	4
Mlu_01875.mRNA1	42
Mlu_01876.mRNA1	2
Mlu_01877.mRNA1	0
Mlu_01878.mRNA1	2030
Mlu_01879.mRNA1	101
Mlu_01880.mRNA1	1479
Mlu_01881.mRNA1	574
Mlu_01882.mRNA1	7
Mlu_01883.mRNA1	5
Mlu_01884.mRNA1	81
Mlu_01885.mRNA1	3
Mlu_01886.mRNA1	0
Mlu_01887.mRNA1	30
Mlu_01888.mRNA1	43
Mlu_01889.mRNA1	552
Mlu_01890.mRNA1	1
Mlu_01891.mRNA1	349
Mlu_01892.mRNA1	0
Mlu_01893.mRNA1	0
Mlu_01894.mRNA1	6
Mlu_01895.mRNA1	0
Mlu_01896.mRNA1	128
Mlu_01897.mRNA1	9
Mlu_01898.mRNA1	1
Mlu_01899.mRNA1	1036
Mlu_01900.mRNA1	756
Mlu_01901.mRNA1	344
Mlu_01902.mRNA1	72
Mlu_01903.mRNA1	225
Mlu_01904.mRNA1	0
Mlu_01905.mRNA1	66
Mlu_01906.mRNA1	0
Mlu_01907.mRNA1	163
Mlu_01908.mRNA1	143
Mlu_01909.mRNA1	18
Mlu_01910.mRNA1	0
Mlu_01911.mRNA1	0
Mlu_01912.mRNA1	749
Mlu_01913.mRNA1	9714
Mlu_01914.mRNA1	285
Mlu_01915.mRNA1	422
Mlu_01916.mRNA1	2535
Mlu_01917.mRNA1	331
Mlu_01918.mRNA1	53
Mlu_01919.mRNA1	1
Mlu_01920.mRNA1	318
Mlu_01921.mRNA1	2
Mlu_01922.mRNA1	226
Mlu_01923.mRNA1	870
Mlu_01924.mRNA1	468
Mlu_01925.mRNA1	1
Mlu_01926.mRNA1	204
Mlu_01927.mRNA1	5554
Mlu_01928.mRNA1	120
Mlu_01929.mRNA1	23
Mlu_01930.mRNA1	445
Mlu_01931.mRNA1	365
Mlu_01932.mRNA1	49
Mlu_01933.mRNA1	1
Mlu_01934.mRNA1	0
Mlu_01935.mRNA1	0
Mlu_01936.mRNA1	413
Mlu_01937.mRNA1	0
Mlu_01938.mRNA1	382
Mlu_01939.mRNA1	106
Mlu_01940.mRNA1	706
Mlu_01941.mRNA1	665
Mlu_01942.mRNA1	1485
Mlu_01943.mRNA1	2
Mlu_01944.mRNA1	231
Mlu_01945.mRNA1	563
Mlu_01946.mRNA1	3
Mlu_01947.mRNA1	0
Mlu_01948.mRNA1	12
Mlu_01949.mRNA1	4
Mlu_01950.mRNA1	24
Mlu_01951.mRNA1	0
Mlu_01952.mRNA1	0
Mlu_01953.mRNA1	11
Mlu_01954.mRNA1	0
Mlu_01955.mRNA1	0
Mlu_01956.mRNA1	589
Mlu_01957.mRNA1	119
Mlu_01958.mRNA1	350
Mlu_01959.mRNA1	0
Mlu_01960.mRNA1	100
Mlu_01961.mRNA1	39
Mlu_01962.mRNA1	0
Mlu_01963.mRNA1	112
Mlu_01964.mRNA1	0
Mlu_01965.mRNA1	0
Mlu_01966.mRNA1	10
Mlu_01967.mRNA1	421
Mlu_01968.mRNA1	0
Mlu_01969.mRNA1	65
Mlu_01970.mRNA1	631
Mlu_01971.mRNA1	2
Mlu_01972.mRNA1	5
Mlu_01973.mRNA1	5
Mlu_01974.mRNA1	365
Mlu_01975.mRNA1	21
Mlu_01976.mRNA1	4164
Mlu_01977.mRNA1	1419
Mlu_01978.mRNA1	197
Mlu_01979.mRNA1	61
Mlu_01980.mRNA1	5
Mlu_01981.mRNA1	0
Mlu_01982.mRNA1	237
Mlu_01983.mRNA1	22
Mlu_01984.mRNA1	149
Mlu_01985.mRNA1	1
Mlu_01986.mRNA1	0
Mlu_01987.mRNA1	245
Mlu_01988.mRNA1	0
Mlu_01989.mRNA1	1
Mlu_01990.mRNA1	617
Mlu_01991.mRNA1	2
Mlu_01992.mRNA1	92
Mlu_01993.mRNA1	0
Mlu_01994.mRNA1	603
Mlu_01995.mRNA1	552
Mlu_01996.mRNA1	2
Mlu_01997.mRNA1	110
Mlu_01998.mRNA1	11
Mlu_01999.mRNA1	0
Mlu_02000.mRNA1	35
[truncated: 44,860 more rows]
