# Supplementary material for: MYB5a/NEGAN activates petal anthocyanin pigmentation and shapes the MBW regulatory network in Mimulus luteus var. variegatus
Source: bioRxiv preprint, doi:10.1101/2020.04.09.030536, version 3 (2020-04-16)
Supplement: Table S3 [file 030536_file04.csv]

	Mlv-wt_1	Mlv-wt_2	Mlv-wt_3	Vrnai1_1	Vrnai1_2	Vrnai1_3	Mna
Mlu_00001	3.806686483	4.272772112	3.211777067	3.318074185	3.053337432	2.983801998	5.884509311
Mlu_00002	1.017211225	0.963247186	1.273094562	0.553865108	1.060048635	0.791640436	1.163007644
Mlu_00003	0	0	0	0	0	0	0
Mlu_00004	1.597755397	1.600903831	2.28009127	0.956964531	1.520824878	1.034692742	1.410131256
Mlu_00005	2.937832408	2.710571268	2.073056878	1.833285254	2.247070405	1.472733501	2.29621563
Mlu_00006	2.581042905	2.510897873	2.593453014	1.772359578	1.878488243	1.406112063	2.496855416
Mlu_00007	0.456511791	0.685456047	0.379585928	0.475385911	0.626199343	0.587808573	0.648613895
Mlu_00008	10.17555077	9.223127885	10.00158484	9.575544801	9.98626418	9.720362618	4.89089156
Mlu_00009	14.48389773	12.50977107	13.90462623	12.80076796	13.39407191	13.97707767	14.09330361
Mlu_00010	0.133742692	0.474056745	0.215870443	0.092848119	0.13059542	0.103324955	0.136815974
Mlu_00011	0	0	0.031519876	0	0	0.062232966	0.073248638
Mlu_00012	2.134353589	2.324281506	1.528177277	1.731661726	1.980100353	1.549594426	0
Mlu_00013	0.145294083	0.364792481	0.277154363	0.067244957	0.040535709	0.056124579	0.099088537
Mlu_00014	14.05443256	12.03052566	13.29948293	14.07132162	11.44308479	12.13211521	7.628819319
Mlu_00015	0.114368033	0.152018412	0.151035	0.07939766	0.143584318	0	0.116996104
Mlu_00016	0.500462925	1.028062891	0.781080012	0.505361618	0.799667815	0.975387933	0.372336796
Mlu_00017	0	0.080366421	0	0	0	0	0
Mlu_00018	0.524243214	0.725860431	0.548085262	0.318451954	0.438777061	0.550563306	0.268144916
Mlu_00019	0.628560529	0.95483997	0.711497312	0.498703137	0.075155395	0.26014501	0
Mlu_00020	0.921287035	1.02048177	1.081472261	0.390857264	0.792510966	0.578300404	2.041990921
Mlu_00021	0.295405734	0.343572593	0.325095249	0.230714288	0.247246424	0.224654263	0.302193882
Mlu_00022	1.814751588	1.345251166	1.566988128	1.332537926	1.825597181	2.082799651	1.142432542
Mlu_00023	6.192870563	5.598961914	6.704761966	5.054551006	6.093834195	8.679800518	4.4945512
Mlu_00024	0	0	0	0	0	0	0
Mlu_00025	3.625230769	3.486679997	3.074897085	2.639509952	3.108223136	3.355749473	1.989945705
Mlu_00026	3.116481017	3.452031717	4.801580596	2.318092473	5.682603927	4.449917663	1.138605297
Mlu_00027	3.561986901	5.3078544	4.359441331	3.104906553	4.532087132	3.461429473	3.104615357
Mlu_00028	0.053243451	0.141542784	0.14062714	0	0.044563295	0.401056891	0
Mlu_00029	14.54455259	10.23711062	13.09776026	16.55950162	15.06021999	26.22144565	3.910991703
Mlu_00030	8.544353504	9.788029062	9.681101459	7.014929708	9.618097852	9.499801537	5.320422889
Mlu_00031	0.473103336	0.353471635	0.547195259	0.42504295	0.551258477	0.585880121	0.379588085
Mlu_00032	0	0	0	0	0	0	0
Mlu_00033	9.17354202	7.380279877	8.714029046	4.692610812	7.627487623	13.11357681	1.605216296
Mlu_00034	5.303608455	5.24104597	7.358448778	3.315656881	6.530636399	4.199281845	6.703734957
Mlu_00035	3.528050923	3.172083402	3.969757372	2.198375395	3.298584121	2.911791443	3.098563475
Mlu_00036	7.407524088	6.941597713	9.086694618	5.991657757	8.017300889	9.29290705	3.458487097
Mlu_00037	0.335958679	0.23391108	0.21127082	0.1999135	0.301272982	0.319802678	0.147290869
Mlu_00038	9.908703362	9.021017158	10.13010385	7.900965404	10.09354437	7.901148451	7.476793741
Mlu_00039	1.394463923	1.839158166	0.628120831	0.765456987	1.492837769	1.052260539	1.459681989
Mlu_00040	0.156839876	0.023163571	0.161096078	0.072588576	0.087513757	0.060584519	0.053481303
Mlu_00041	0.298418386	0.484805224	0.262728548	0.345284732	0.208139942	0.432276888	0.101758587
Mlu_00042	0	0	0.075193946	0	0	0	0
Mlu_00043	0	0	0	0	0	0	0
Mlu_00044	6.832285306	5.417034387	6.897089867	5.920051547	5.997906037	5.953067107	6.043366577
Mlu_00045	5.275127875	5.035121962	5.071455257	4.020757333	4.742668386	3.664214476	4.4836104
Mlu_00046	0.26710254	0.279723507	0.277913967	0.657435252	0.274365942	0.379879211	0.074520084
Mlu_00047	0	0	0	0	0	0.25000949	0
Mlu_00048	3.309978949	3.44638171	3.642645711	3.274486043	4.501836257	3.931656095	3.047435249
Mlu_00049	0	0	0	0	0	0	0
Mlu_00050	37.61058542	31.7659454	30.71585482	36.35074492	34.01134045	37.14269819	35.63137704
Mlu_00051	0	0	0	0	0	0	0
Mlu_00052	0.034698604	0	0	0	0.058083543	0.040210404	0
Mlu_00053	0.013950835	0	0	0	0	0.008083448	0.028542824
Mlu_00054	0	0	0	0	0	0	0
Mlu_00055	0	0	0.019972991	0	0	0	0
Mlu_00056	0	0	0	0	0	0	0
Mlu_00057	0.171625899	0.126736544	0.100733345	0.238295516	0.047882043	0.082870128	0.058523234
Mlu_00058	2.320400322	1.215021232	2.321463894	0.732222861	2.030388616	2.383423808	0.431585627
Mlu_00059	0.889790223	0.982893448	1.16433029	0.516175815	0.923260905	0.660347914	0.51122887
Mlu_00060	0.040210486	0.03563195	0.141605785	0.139576521	0.084137659	0.069896753	0
Mlu_00061	6.084379376	6.060467348	6.826782014	4.795618638	7.112209889	6.404761197	4.200160122
Mlu_00062	0	0	0.085652841	0	0	0	0
Mlu_00063	3.972847828	4.50989935	3.886342837	2.95636053	3.2164982	3.204693749	4.356333233
Mlu_00064	18.43244527	33.27224895	18.93265108	15.79795898	25.33148633	18.65738632	22.1150683
Mlu_00065	14.06674982	12.16009513	14.74515314	12.86146136	16.52607784	16.77480596	9.563989648
Mlu_00066	0.493927882	0.334701957	0.358116511	0.443752027	0.316132446	0.404038074	0.118888913
Mlu_00067	32.86239678	30.76291952	36.06882467	25.50761457	34.65602447	35.86979074	12.18857339
Mlu_00068	1.367527846	0.81823431	1.759657381	1.054864596	0.919579472	0.365713091	0.956548619
Mlu_00069	0	0	0	0	0	0	0
Mlu_00070	0.746986307	0.51149237	0.717435546	0.990016193	0.568369878	0.550864038	0.277873219
Mlu_00071	0.02032458	0.024013784	0.017893829	0.03762646	0.011340741	0	0
Mlu_00072	2.043488818	1.932885565	2.26402892	2.056245746	2.258037879	2.175186233	0.610692171
Mlu_00073	2.325369989	1.979785985	3.318440245	2.279068775	3.269225316	2.245625043	1.337105974
Mlu_00074	1.500434812	0.189941284	0.188712549	0.595226325	0.717612807	0.993586104	0
Mlu_00075	0	0.010855789	0	0	0	0.007098352	0.300773169
Mlu_00076	0	0	0	0	0	0	0
Mlu_00077	0.040665745	0.126123803	0.107406775	0	0.085090258	0.223845706	0
Mlu_00078	0	0	0	0	0	0	0
Mlu_00079	8.37843343	10.0626705	7.747540563	5.340988003	9.592593875	9.72459595	3.989001175
Mlu_00080	0.026357726	0	0.02320543	0	0.066182062	0	0
Mlu_00081	6.22805274	3.936274583	2.660963989	6.708089928	4.311982536	3.263735194	1.311710968
Mlu_00082	0	0	0	0	0	0	0
Mlu_00083	0.44929136	0.398133155	0.645383485	0.393993226	0.316668997	0.219225404	0.387044761
Mlu_00084	2.541545479	2.436292827	2.730135358	1.664543188	2.421533233	2.296935881	2.681707179
Mlu_00085	0.209614597	0.079605856	0.60636344	0.041577323	0.375946322	0.242911429	0.122532197
Mlu_00086	19.55322602	33.11183412	44.49568949	10.2383381	21.28903081	29.62020169	8.814679013
Mlu_00087	3.935574515	3.513576686	5.917570074	2.844754033	2.886847439	2.246203278	0.422203331
Mlu_00088	5.394007572	5.71329452	6.385876937	3.982576292	5.242287998	4.162320164	6.985084155
Mlu_00089	59.58310701	54.30472758	49.52332123	62.27786773	60.32860023	75.43892184	4.295294266
Mlu_00090	0	0.348413007	0.173079557	0	0.493624194	0	0
Mlu_00091	0.123607439	0.07823784	0.108824404	0.416800789	0.073897147	0.061389521	0.325151542
Mlu_00092	7.150230035	8.429892561	8.737145927	7.360266157	6.895983923	5.274009725	12.10681759
Mlu_00093	3.136547477	2.822261275	3.08987858	2.676290543	2.550032409	2.361807267	2.572551881
Mlu_00094	3.960930805	3.861950186	4.495320728	3.033697035	4.214886897	3.811556679	3.059879106
Mlu_00095	0.36350015	0.515376789	0.320026751	0.504705035	0.243391652	0.126372412	0
Mlu_00096	1.028206227	1.1104401	1.188122527	0.713811067	1.102618324	1.191534592	1.972187705
Mlu_00097	0	0	0	0	0	0	0
Mlu_00098	0	0	0	0	0	0	0
Mlu_00099	0	0.012901358	0	0	0	0	0
Mlu_00100	0.284338959	0.310108219	0.192563825	0.394792971	0.201370941	0.114059629	0.089499324
Mlu_00101	0.02561597	0.045398457	0.112761932	0.035566723	0.107199292	0.014842506	0
Mlu_00102	6.483382088	7.126903522	7.610655117	5.659428565	7.601555175	6.84752218	5.14917722
Mlu_00103	0.04275922	0.07578095	0.188226802	0.118738842	0.214729701	0.049551431	0.262450719
Mlu_00104	13.55003653	14.290745	13.78357086	11.71526042	13.66022961	12.98902517	9.807864361
Mlu_00105	1.331004247	0.780251871	1.027596529	0.710786444	0.634130886	0.54578343	0.796006156
Mlu_00106	4.406257474	3.980253806	3.589143516	2.643749549	2.594821474	2.03681501	4.195354771
Mlu_00107	1.110106902	0.421588054	0.279240526	0	0.796396074	0.459444648	0
Mlu_00108	4.226833999	3.520668497	4.193809115	3.413830925	3.576045413	2.88061899	3.404695028
Mlu_00109	14.52261795	17.99840531	18.84693625	11.88918562	15.12211782	12.80074365	11.00209648
Mlu_00110	1.344678948	1.429881773	1.347778913	0.890430415	1.177403329	1.198675639	1.777670562
Mlu_00111	5.647219936	5.745844679	6.765560957	4.237390462	5.34922829	5.804609656	3.49386685
Mlu_00112	1.057836875	1.145695365	0.862336234	1.033574014	1.278882493	1.45288534	0.240476661
Mlu_00113	0.391818615	0.142966558	0.263791735	0.192008492	0.289360003	0.186965127	0.18862223
Mlu_00114	9.21539212	8.393626872	11.47913559	7.368130081	8.930874713	11.32395927	6.129108892
Mlu_00115	3.053862115	3.639287049	3.553936801	2.339399821	3.055445971	3.538961597	3.447213248
Mlu_00116	11.1427476	12.16745644	9.810112365	8.359769485	11.94844448	12.13924719	6.187122364
Mlu_00117	1.236137781	1.556601061	1.069206869	1.083995723	1.579146328	1.269140866	1.3754679
Mlu_00118	2.515101581	1.498623098	2.163400331	1.685848761	2.226051474	2.462351465	1.774411214
Mlu_00119	0.831501649	0.608680177	0.541085491	0.552154997	0.453876435	0.377054574	0.961557749
Mlu_00120	5.454935883	4.943317804	6.170258602	5.343437177	6.250037684	6.546475922	3.322888275
Mlu_00121	1.868949439	1.922308829	2.732588037	1.575511168	1.508392565	1.953112814	0.819384063
Mlu_00122	3.947629731	3.204879088	3.267392298	3.216466696	2.86879186	2.780432831	6.819237147
Mlu_00123	4.740740308	4.269582472	5.510459223	2.753390136	4.694014292	4.703839085	2.6942656
Mlu_00124	2.616056197	3.245453441	2.76382158	2.97187088	3.423686011	3.968654587	3.600666057
Mlu_00125	6.162265707	5.306058801	5.630006923	4.600896399	4.573761416	4.075832759	6.779632486
Mlu_00126	3.356409029	3.979043015	3.514046642	4.093450667	3.074958632	2.365277499	4.732712011
Mlu_00127	3.961373569	3.276916307	4.201823882	3.013409952	4.012180371	3.681049833	2.780637696
Mlu_00128	10.25546127	9.157529536	9.833364413	5.665092658	9.546053721	11.57417098	4.351156658
Mlu_00129	17.95209427	15.32463845	18.68459	13.39142227	16.76583436	15.88132309	12.31434127
Mlu_00130	1.274530645	1.312554339	1.880277443	0.81307484	1.182070863	1.476987119	1.409533152
Mlu_00131	3.672795957	3.395335238	4.002600489	3.225105889	4.170709031	3.980133159	3.127609615
Mlu_00132	10.0864899	12.20799962	14.61980779	7.992913299	8.936285361	5.815844612	29.99847671
Mlu_00133	0.190122539	0.210592983	0.188307586	0.13198867	0.258581868	0.234093292	0.388982754
Mlu_00134	0.943414492	1.699853141	1.218191749	1.309892292	1.947709156	1.603468345	0.579055964
Mlu_00135	0.107347056	0.126832091	0.12601161	0.049682327	0.089846515	0.041466302	0.146418387
Mlu_00136	0.061984914	0.219708202	0.327430355	0.086063508	0	0	2.28273368
Mlu_00137	0	0	0	0	0	0	0
Mlu_00138	4.243930582	2.686213419	3.309356923	1.851935921	3.247590805	2.950841941	1.736580853
Mlu_00139	0	0	0	0	0	0	0
Mlu_00140	6.767834271	6.303896214	7.21104722	5.552690026	7.370273895	8.867813474	1.888187118
Mlu_00141	0.372329499	0.337607391	0.388786213	0.432807258	0.253651908	0.270925061	0.549183431
Mlu_00142	5.650474445	5.395233977	5.861658074	6.20338049	5.865786952	6.954120274	4.660100573
Mlu_00143	3.96813806	3.756553888	3.927544923	3.490552004	2.970533726	2.927596295	5.042636219
Mlu_00144	1.829229563	2.374874061	2.546773706	1.506166486	2.305423026	1.971905839	1.849504667
Mlu_00145	0	0	0	0	0	0	0
Mlu_00146	0	0	0	0	0	0	0
Mlu_00147	0.943676295	1.239920333	0.945411055	0.768080983	1.171128638	1.187851163	0.332883135
Mlu_00148	0	0	0	0	0	0	0
Mlu_00149	0.417418625	0.46236198	0.689056421	0.470899507	0.524051755	0.090698378	1.227655228
Mlu_00150	7.965186067	12.60061006	14.49579578	5.937897373	7.606233894	7.712682154	15.96832098
Mlu_00151	0.941039255	1.065524278	1.104658822	1.306594373	1.093921962	1.302567148	1.925326912
Mlu_00152	7.179817194	6.117589418	6.776986232	6.613969402	6.81825363	6.020228528	9.039757131
Mlu_00153	0	0	0	0	0	0	0
Mlu_00154	18.67867643	13.89879701	15.77596297	21.21919805	22.10387397	31.07044641	12.98239751
Mlu_00155	3.284077136	2.560921699	3.161168362	2.523092809	3.170146197	3.374427929	2.150106978
Mlu_00156	388.8542223	301.828778	444.8772893	298.538688	506.1928742	474.7029908	649.2569605
Mlu_00157	1.536672244	1.126924366	1.306239971	1.030016847	1.507902509	0.859681756	0.975713917
Mlu_00158	0	0	0	0	0	0	0
Mlu_00159	0	0	0	0	0	0	0
Mlu_00160	9.168423987	8.503500656	9.856573146	7.255830563	9.759473921	8.986907054	6.620545259
Mlu_00161	0.173266825	0.460613806	1.067812857	0.601434683	0.652587918	0.803159562	0
Mlu_00162	0	0	0	0	0	0	0
Mlu_00163	9.020346629	7.801632948	10.82443248	6.476649068	9.256237716	7.464021131	5.561856615
Mlu_00164	51.4914855	54.26620367	49.78799159	50.62423226	61.5314811	91.70504887	46.28067148
Mlu_00165	1.645200678	1.417374783	1.086330147	1.0786942	1.797733596	1.535821711	2.337508124
Mlu_00166	1.920199313	2.031316513	1.991965793	2.004755332	2.005827464	1.129859198	2.61909826
Mlu_00167	0	0	0	0	0	0	0
Mlu_00168	0.029944942	0.185746997	0.131818139	0	0.075189264	0	1.470386363
Mlu_00169	1.629393918	1.722504743	1.761695981	1.031947555	1.567124978	1.366474758	2.631846101
Mlu_00170	7.094074099	10.3724164	8.015246511	6.320308001	8.015683977	4.727047766	13.18371219
Mlu_00171	13.10613871	12.1119282	10.83542756	13.84311981	10.32566869	9.805358854	4.418660503
Mlu_00172	6.158094616	4.928820174	5.509052433	4.964668005	5.90233852	4.661611932	4.673898157
Mlu_00173	10.57124527	6.308764087	10.63652548	7.488642892	13.00090735	10.87541283	5.296732694
Mlu_00174	2.549235175	2.14007545	2.392010146	1.956044108	1.993268284	2.157325708	1.852920624
Mlu_00175	2.673043531	2.256949379	2.708580112	2.182496526	2.413148949	2.488835779	2.820457114
Mlu_00176	2.412821253	3.319661816	3.549743452	2.512577441	3.852925904	4.046976366	1.883676398
Mlu_00177	4.857024212	5.677946799	4.489947428	2.995794009	3.940111925	3.063231265	3.89846674
Mlu_00178	0.137776893	0.034882582	0.103970776	0.218625783	0.049420906	0.114044613	0.483232722
Mlu_00179	4.216565837	5.670099081	4.882296509	3.690403217	4.353074724	3.916691888	4.565216853
Mlu_00180	1.789438799	1.638541959	1.575427921	1.076643667	1.747329209	2.211933157	0.488148914
Mlu_00181	0.195846228	0.099169344	0.172423676	0.03884635	0.070250517	0.162111417	0.629660715
Mlu_00182	0.098295603	0.087103252	0.086539778	0.068239704	0.082270699	0.170864474	0
Mlu_00183	0	0	0	0	0	0	0
Mlu_00184	0	0	0	0	0	0	0
Mlu_00185	0	0	0	0	0	0	0
Mlu_00186	5.653370544	5.244711062	6.699577985	4.143416786	5.980554337	6.292030263	4.172102074
Mlu_00187	12.52125681	13.56834454	19.68641898	8.780683957	14.39286281	7.213118097	12.90166796
Mlu_00188	21.17352159	18.36848124	17.21150098	16.51604802	17.65239256	19.97592952	8.803701829
Mlu_00189	4.062205083	5.006807215	3.738941662	3.332848404	4.543573862	4.678947528	3.248885133
Mlu_00190	1.0338231	1.458770145	1.205845322	0.923423657	0.914883437	0.965302722	1.050843212
Mlu_00191	0.383185374	0.293251419	0.414029891	0.411119624	0.247825655	0.312855913	0.178177552
Mlu_00192	0.269217717	0.412064149	0.452493073	0.339816134	0.225327778	0.29780136	0.500734705
Mlu_00193	0.130238784	0.161572947	0.160527727	0.108498723	0.130807509	0.120741549	0.106585239
Mlu_00194	0.04667919	0.020682051	0.061644774	0.129624279	0.097672976	0.08114112	0
Mlu_00195	7.300202368	7.649439695	8.139458248	7.620519875	9.62224109	9.262580958	4.715168151
Mlu_00196	3.931195417	3.28585666	4.022286977	3.024195153	3.966147533	4.26015532	2.695512406
Mlu_00197	0.330997895	0.696609069	0.400691028	0.459576988	0.519442645	0.359602692	0.338603917
Mlu_00198	0.021771896	0	0.047920126	0.030229384	0.009111237	0.012615158	0.022272194
Mlu_00199	0.027121562	0	0.047755829	0	0	0	0
Mlu_00200	0.772860609	0.870174357	0.760479551	0.631226604	0.974099486	0.500497926	3.590345948
Mlu_00201	5.870816568	5.637263061	6.298817431	4.796475772	4.818912705	3.707953254	7.454047781
Mlu_00202	1.919937225	2.232989185	1.690319173	1.9160107	2.159317995	2.416118804	1.657171899
Mlu_00203	1.062872032	0.568357125	0.790552569	1.06864958	0.720878282	0.785744113	0.149971839
Mlu_00204	0	0	0	0	0	0	0
Mlu_00205	0.110534521	0.053871727	0.038925985	0.176493542	0.087888618	0.233769167	0
Mlu_00206	3.208408438	3.366811838	2.081353143	3.692747819	2.89735031	2.103637669	1.986555189
Mlu_00207	0	0	0	0	0	0.01847479	0
Mlu_00208	7.715936241	6.857477175	8.491420185	6.396446833	7.711641724	8.731205754	4.87523723
Mlu_00209	2.522047933	2.000575327	2.453205371	1.609680007	2.059814538	1.862023544	1.62290463
Mlu_00210	0.240673725	0.252045893	0.404517186	0.121514759	0.384562016	0.202839442	0.179057586
Mlu_00211	0.033184093	0.008821684	0.020450771	0.041467275	0.013887084	0.01345936	0.013578653
Mlu_00212	0.522345354	0.341061305	0.205733374	0.45805584	0.230099266	0.422130215	1.23743831
Mlu_00213	3.331111557	3.199089821	3.270522204	2.203587223	3.40112684	3.445931332	1.891160641
Mlu_00214	0.07710801	0.034164084	0	0.026765326	0.016134318	0.044678226	0.197199699
Mlu_00215	11.37266368	10.54252504	11.7127724	7.448338032	12.71142815	14.35343327	6.292602063
Mlu_00216	5.972838417	6.458410177	6.166225443	4.195883808	4.7312915	3.646205826	4.655305639
Mlu_00217	16.61195685	28.71216395	23.6030819	10.27649411	19.96082653	23.53925989	9.422240667
Mlu_00218	2.999809153	3.277280045	3.280198333	2.624591033	3.485252057	2.698515134	2.157928135
Mlu_00219	2.352313405	2.618948359	3.50474319	2.065732512	2.692405085	3.017209843	1.809917334
Mlu_00220	2.018203685	2.547118742	2.880623674	2.292703333	2.201053547	1.470603454	1.626638879
Mlu_00221	0.043373255	0.153738376	0.190929798	0.240887938	0.181511072	0.100526009	2.395976343
Mlu_00222	3.001537374	2.785879468	2.733686454	2.532840993	1.775868142	1.439306973	1.085266427
Mlu_00223	1.555989572	1.378818051	1.743507103	1.620320731	0.976740156	1.475308797	3.617601716
Mlu_00224	1.712036549	1.424897606	1.590558009	1.247645216	1.203342187	1.342755597	1.199838761
Mlu_00225	8.008628361	7.108443014	8.633186251	8.073674501	8.218365046	8.277661078	6.137734736
Mlu_00226	1.172824311	1.13671425	0.742151391	1.06864958	1.349729549	1.061816368	1.874647993
Mlu_00227	26.72739974	26.27725578	26.88017999	23.91827687	29.61996373	31.5042787	20.79555935
Mlu_00228	0.182326356	0.053855303	0.142685098	0.112512293	0.152602114	0.117382505	0
Mlu_00229	1.02855731	0.683581085	1.038713733	0.756058023	1.114072238	1.060477315	0.742724184
Mlu_00230	1.043274766	1.105923722	0.978591559	0.934107931	1.419957256	1.53666875	0.817891177
Mlu_00231	0	0	0	0	0	0	0
Mlu_00232	0	0	0	0	0	0	0
Mlu_00233	0.063331898	0.202034382	0.100363708	0.281387969	0.159021138	0.095409645	1.088425056
Mlu_00234	0	0	0	0	0	0	0
Mlu_00235	1.03734124	1.130475713	1.179888019	0.823031843	1.035399842	1.179720919	0.96231082
Mlu_00236	9.139385504	9.891079959	11.3440283	8.94517127	10.84711805	6.858208477	12.56804593
Mlu_00237	12.56820456	12.19312224	14.24053232	9.265718264	14.44234383	16.74657066	6.241582667
Mlu_00238	5.928689988	5.727480715	4.175710841	5.907485906	6.732955709	8.527440567	0.761088719
Mlu_00239	0	0	0	0	0	0	0
Mlu_00240	0.0641698	0.085294734	0.028247653	0	0.080562519	0.018590759	0.131288723
Mlu_00241	7.3533214	6.542422016	7.076720579	5.621581962	4.759168268	3.691448371	13.27821909
Mlu_00242	0.030231041	0.026788807	0	0.041974559	0	0	0
Mlu_00243	0	0	0.044118318	0	0	0	0
Mlu_00244	0.013989016	0	0	0.019423175	0.011708419	0	0
Mlu_00245	24.22747945	29.27128072	27.25226651	18.45201609	27.41842019	30.99129989	17.1195632
Mlu_00246	3.229961649	3.078198558	3.058285604	2.312848241	2.958425161	3.684181429	1.745606189
Mlu_00247	6.593491766	5.908599725	7.238168081	6.61580843	7.671247991	8.532430391	5.201333436
Mlu_00248	3.308372841	3.279492555	3.998795021	3.114264318	3.238341337	2.176875883	1.204615579
Mlu_00249	4.118828314	4.92988028	4.966732446	2.656136276	4.885100696	5.463045215	3.195052232
Mlu_00250	4.307166183	4.614778523	5.584645963	2.990161711	3.342798608	3.970392319	3.524912663
Mlu_00251	39.78599355	39.5220841	49.53809261	31.45509632	40.88925662	31.83829556	36.27870795
Mlu_00252	10.01974999	11.44127453	10.66403931	7.075331792	5.762904735	4.294213526	8.108976447
Mlu_00253	9.571999805	8.274578682	8.504534687	9.226008043	11.04949852	12.95820114	8.56421787
Mlu_00254	7.664276065	7.603162909	7.638853987	5.822725424	7.423401252	7.541091483	5.029686686
Mlu_00255	9.307614116	8.8851034	10.24102587	7.556809884	9.809613235	8.385312371	5.553413965
Mlu_00256	0.813172713	0.617641239	0.920468551	1.129056928	0.972290079	0.673102474	0.950695612
Mlu_00257	64.99973209	72.55964031	73.22028199	48.20920498	79.85530627	85.50795118	69.28776978
Mlu_00258	15.71767532	22.62098444	16.27145476	15.57735453	14.38005924	11.65093167	14.1937459
Mlu_00259	0	0	0	0	0	0	0
Mlu_00260	0.014985978	0	0	0	0	0	0
Mlu_00261	2.210409447	1.875569594	2.065385262	2.200460101	2.033311354	2.380288065	2.730508783
Mlu_00262	7.589200182	7.214275922	7.990649996	6.168046808	6.693883836	5.627858477	8.215402375
Mlu_00263	8.944593771	10.83143017	10.67728821	6.253797069	9.191459844	7.571185606	8.954755672
Mlu_00264	0.109891666	0.292136816	0.193497983	0.406880178	0.091976283	0.318369307	0.074944582
Mlu_00265	0.024564816	0	0.021626946	0.068214477	0	0	0
Mlu_00266	2.78832071	2.584869125	2.719215035	1.608148594	2.872304327	3.479796393	1.930851126
Mlu_00267	0.15396716	2.085518835	2.807887808	0.030539583	0.202504111	0.076467649	0
Mlu_00268	42.48032746	47.80850476	47.2372859	32.38282923	45.5157526	33.74145495	37.67356028
Mlu_00269	12.04939394	13.77863216	12.29711182	12.28395085	16.02854622	17.15258937	9.226687421
Mlu_00270	4.714102531	5.507696438	6.000769118	3.877174641	4.37280104	3.810131076	4.791712089
Mlu_00271	21.4497973	20.53138325	23.51703834	18.37972397	22.29749849	19.64155053	13.97747159
Mlu_00272	1.069108758	0.626231287	1.356033722	0.327074188	0.849315403	0.325482767	0.519032619
Mlu_00273	47.80110454	42.82312592	49.45984347	43.70214336	50.65221928	54.8691881	25.88894261
Mlu_00274	0	0	0	0	0	0	0
Mlu_00275	0.32166998	0.529366097	0.28319933	0.510429214	0.461535208	0.745533141	0.094017616
Mlu_00276	1.310706208	1.683387238	1.307323262	1.059666342	1.624707647	1.807309554	0.916513298
Mlu_00277	0	0.113016887	0.112285778	0.354165376	0.32023988	0.221697475	0
Mlu_00278	1.980656393	1.698513408	2.418786803	1.862943932	2.352941992	2.406341345	0
Mlu_00279	0.1372889	0	0	0	0	0	0
Mlu_00280	0.048396087	0.028590337	0	0.02239866	0.013502062	0.009347284	0
Mlu_00281	0.124901931	0.1549521	0.131956895	0.034684241	0.146355244	0.057896935	0
Mlu_00282	2.560420174	2.181615344	2.535977823	2.666278723	2.987837687	4.308055346	0.050370312
Mlu_00283	0	0	0	0	0	0	0
Mlu_00284	21.83379004	17.69924384	18.90647628	18.7148395	20.21370063	29.06519958	13.08747377
Mlu_00285	9.445814232	8.732623602	10.4041583	9.481497496	11.43102	14.31069708	13.38579421
Mlu_00286	5.137593104	5.480387222	6.088036934	4.699212598	6.154535634	7.42094861	3.636611026
Mlu_00287	5.743844667	5.063989661	5.621630073	3.805374094	6.418053109	7.196850639	3.101962514
Mlu_00288	4.920032074	4.253005869	5.238453716	3.651454371	5.823799515	6.692041629	3.228351589
Mlu_00289	0.374090513	0.248621245	0.823376356	0.194778495	0.117413777	0.243851621	0
Mlu_00290	0	0	0	0	0	0	0
Mlu_00291	3.598979618	4.330991505	4.498563934	2.806976703	3.3841286	3.926093535	2.409001017
Mlu_00292	0.061129556	0	0	0	0	0	0
Mlu_00293	4.183094819	4.032538255	4.653733533	3.660834935	3.798200558	3.312506513	4.979454162
Mlu_00294	0.047838609	0.084783007	0	0	0.040039591	0.027718835	0
Mlu_00295	0.650055175	0.828053413	0.894235557	0.761547591	1.054151494	0.635609576	0.706554886
Mlu_00296	24.73498421	26.52274828	20.58483964	28.19622502	23.64249683	22.74893624	25.75254324
Mlu_00297	0	0	0	0	0	0	0
Mlu_00298	10.30122336	8.603333558	8.95333088	7.859699769	13.08426025	13.17707276	8.012871335
Mlu_00299	104.8506338	80.31103908	66.3834407	117.3055844	98.99762542	157.489796	67.97473624
Mlu_00300	3.694804171	4.209554854	5.369896357	1.872887776	3.092448835	2.650586053	2.879776999
Mlu_00301	4.272190969	5.070189278	5.485158086	3.107113309	4.022668806	3.079527538	3.954136972
Mlu_00302	11.68989556	11.46803859	10.68407061	10.0743766	15.2532818	13.20260845	5.903297655
Mlu_00303	7.55758155	11.21972225	8.727606946	8.176668871	10.92584048	8.644345865	5.823537226
Mlu_00304	11.90011777	13.28380857	13.56997392	8.894084478	12.04936233	10.02522651	12.59241784
Mlu_00305	12.33236059	13.29525358	13.26804108	11.40501497	15.61318718	14.08495678	10.65734558
Mlu_00306	2.298926829	2.233042245	3.074897085	1.166295095	2.812201885	2.920270534	1.989945705
Mlu_00307	0	0	0	0	0	0	0
Mlu_00308	1.605153681	1.618575043	1.868000101	1.319282005	1.791292277	1.330954313	2.340376869
Mlu_00309	3.524033954	3.089373981	3.450988413	2.773558856	2.618289495	2.57695545	3.392953369
Mlu_00310	0	0	0	0.141938585	0	0	0
Mlu_00311	6.727001648	6.788958729	5.790864264	4.773862429	6.287184195	2.901684951	1.758626472
Mlu_00312	7.857583702	7.99722794	8.597174512	5.968839822	9.495533215	9.518141943	4.601545984
Mlu_00313	0.022704269	0.026825421	0.026651886	0	0.012668563	0.004385132	0
Mlu_00314	0	0	0	0	0	0	0
Mlu_00315	4.692743986	4.885734594	5.639586346	4.731921418	5.943814992	5.190046638	3.066529454
Mlu_00316	0	0	0	0	0	0	0
Mlu_00317	0.175787903	0.207695937	0.15476426	0.081358096	0	0.101855718	0
Mlu_00318	0.869237223	0.77448283	0.865918845	0.687767785	0.875026225	1.010073465	0.570069826
Mlu_00319	0	0	0	0	0	0	0
Mlu_00320	0.270825477	0.183520349	0.210384405	0.376030057	0.226673429	0.332307028	0.032593976
Mlu_00321	0.021144893	0	0.018616035	0.014679408	0.008848845	0.0428815	0.021630783
Mlu_00322	4.442324843	6.091220498	3.705193604	7.076951982	5.988102644	6.882034641	7.940750328
Mlu_00323	3.725920686	3.492381955	3.990850196	1.792908446	2.251619131	2.564166162	1.513607487
Mlu_00324	19.30653848	16.9769287	19.80193173	17.99945828	18.49958015	17.64113789	12.97733955
Mlu_00325	8.532917725	8.043961495	5.914024411	9.830992177	4.558605945	7.468862753	8.54327286
Mlu_00326	13.65063167	11.342874	13.44341226	10.39846305	10.2066428	9.637175643	9.651101902
Mlu_00327	6.907942452	9.698802035	6.213415872	7.515335084	10.63743107	15.07482967	8.076206286
Mlu_00328	0	0.295888433	0.146987161	0.231809247	0	0	0
Mlu_00329	0.573392095	0.479013377	0.41425767	0.528728476	0.498230616	0.755776005	0.174627147
Mlu_00330	0	0	0	0	0	0	0
Mlu_00331	1.861863159	2.181486295	2.185587427	1.752137268	1.766104993	1.941854535	0.677207833
Mlu_00332	0	0	0	0	0	0	0
Mlu_00333	0	0	0	0	0	0	0
Mlu_00334	2.086723643	1.903506406	2.341476513	1.846337816	1.643792883	1.813646432	1.506829128
Mlu_00335	0	0	0	0	0	0	0
Mlu_00336	1.634955656	1.484565385	1.386108575	1.933762318	1.621822383	1.999924034	10.86109091
Mlu_00337	6.616980301	4.927347125	6.070385251	7.874918999	5.352070411	6.024914898	0.227530498
Mlu_00338	0	0	0	0	0	0	0
Mlu_00339	0.869115459	0.910182373	0.69561106	0.219405661	0.991943981	1.007172596	0
Mlu_00340	9.950562152	7.845999603	8.468003845	9.087617922	7.438505251	8.046805457	19.54273667
Mlu_00341	55.62183124	53.0757956	55.83853165	48.59329479	64.55793733	75.35586415	28.21281528
Mlu_00342	5.29845421	5.541816296	5.134531906	4.996344225	6.366384766	9.0519776	4.595117557
Mlu_00343	1.705115322	1.579643885	2.092566832	1.578321749	2.162324749	2.73941192	0.422859945
Mlu_00344	4.33355396	4.649553754	5.27405723	3.745853649	4.071557957	4.972695157	2.998885422
Mlu_00345	4.065641447	3.039786902	5.033537391	1.323041306	2.126768357	1.472331224	3.11929956
Mlu_00346	2.415239074	2.955555424	3.164262772	2.155795908	2.695317682	2.765574475	2.353084768
Mlu_00347	0.24671223	0.801608638	0.144804183	0.228366536	0.344152182	0.571803884	0
Mlu_00348	2.585246702	3.714939946	3.629392762	1.649233825	2.94352046	3.171343658	1.953707806
Mlu_00349	7.879496508	7.701215279	7.847083773	7.468452739	6.501903292	6.149673147	11.02784649
Mlu_00350	0.132984311	0.196403596	0.156106445	0.184643256	0.111304188	0.102739057	0
Mlu_00351	0.077175177	0.068387687	0	0.053577282	0.032296744	0.044717145	0
Mlu_00352	0.139340136	0.108039997	0.138009964	0.048367015	0.01457798	0.111013388	0.427626126
Mlu_00353	6.898071295	8.484454829	9.947839926	6.958789521	8.991015284	8.732826767	7.019829479
Mlu_00354	0.296642087	0.394297755	0.522329376	0.20593768	0.620703042	0.515644574	0
Mlu_00355	8.070586323	8.105186789	11.21069689	7.96848198	8.556152698	7.637941758	5.870962374
Mlu_00356	0.052321124	0	0	0	0	0	0
Mlu_00357	0	0	0	0	0	0.044717145	0
Mlu_00358	0.300306541	0.709633	0.58165995	0.361368197	0.502696528	0.348009595	1.720360905
Mlu_00359	4.080763313	4.144126554	3.576820727	3.284258298	4.050222282	4.896381519	4.248421015
Mlu_00360	0.034899069	0	0.030725257	0	0.029209555	0.020221356	0
Mlu_00361	0.127463739	0.130327132	0.077690425	0.081682231	0.065651459	0.119305104	0.020060421
Mlu_00362	24.82906472	26.50892476	29.90045495	23.04603655	29.1349323	29.94558118	15.2733358
Mlu_00363	0.427452727	0.528159646	0.498240797	0.259134048	0.418233612	0.317444323	0.332575497
Mlu_00364	3.680591824	4.659291644	4.301252389	3.437319185	4.419127333	4.874566839	3.047993448
Mlu_00365	1.655676762	2.037714498	1.74919605	1.583644791	1.678304038	2.035929997	2.107743759
Mlu_00366	0	0.052903682	0.131403617	0.165786308	0.049968547	0.069185016	0
Mlu_00367	1.665476114	1.813763518	1.877400315	1.329115705	1.89552153	1.817297844	1.640055712
Mlu_00368	7.699544536	7.98397263	8.637843294	6.149669637	7.957947106	7.755509523	3.500654604
Mlu_00369	2.748968518	3.008085451	3.504310557	1.802135198	2.974897928	2.745972213	1.933769918
Mlu_00370	6.274043788	6.014535605	7.297965119	2.613375669	6.619695821	9.848442516	2.5283879
Mlu_00371	0	0	0	0	0	0	0
Mlu_00372	3.677582324	4.61863995	4.251010331	3.52656489	5.369952494	5.518823868	3.356108817
Mlu_00373	2.539891777	2.035054136	2.356639199	1.562656432	2.202195859	2.396978149	1.151323067
Mlu_00374	0.563986189	0.454334862	0.722233211	0.640695003	0.729517649	0.386202932	0.419597137
Mlu_00375	25.54319601	30.81786763	27.23092658	22.39721329	25.34260016	25.77625686	30.39939206
Mlu_00376	1.062103135	0.911756115	0.75975182	0.875595169	0.80561178	0.807722969	0.746975123
Mlu_00377	3.678290864	3.858502033	4.743788517	2.594987301	3.544582109	3.271817795	3.823833158
Mlu_00378	5.07769959	8.09398455	7.039632803	3.484570451	5.910772153	5.444651123	3.582331291
Mlu_00379	13.59451309	13.03438185	13.69457783	11.84828646	13.71607702	13.86824723	10.01401822
Mlu_00380	3.197489438	3.202343408	3.035008585	2.266037063	3.512525844	3.840496662	2.65765886
Mlu_00381	6.387394402	6.205145347	7.431329249	5.071545293	6.217284127	5.241725606	4.898207994
Mlu_00382	0.833298346	0.711066768	1.73899534	0.728481824	0.516627892	0.429184894	0
Mlu_00383	2.188869608	2.335479725	2.399028099	1.705648546	2.280682047	1.682416806	1.690800162
Mlu_00384	0	0	0	0	0	0	0
Mlu_00385	0.39808983	0.176380823	0.292066351	0.460609488	0.22212678	0.249884673	0.407237561
Mlu_00386	0.602806529	0.534168441	0.53071289	0.643824706	0.815013847	0.564222395	0.189741064
Mlu_00387	11.27261574	10.71945176	9.390876196	17.06525384	8.176885075	6.264739816	19.29381423
Mlu_00388	0	0	0	0	0	0	0
Mlu_00389	3.552016691	3.115775496	3.190383316	3.238069777	3.273236602	3.575729687	3.523528444
Mlu_00390	0.315250631	0.217276008	0.493418156	0.194538915	0.205221375	0.243551681	0.07166551
Mlu_00391	3.74534475	3.508174	4.952389969	3.460247337	4.338589216	3.869949732	3.117572558
Mlu_00392	2.426849663	2.059651375	2.588002341	2.13565001	2.889462061	2.039943691	1.748321405
Mlu_00393	2.940359287	2.96691231	4.138144359	2.652179315	4.131604743	3.718325902	2.019921103
Mlu_00394	11.72078366	10.99339949	12.06531248	8.587573294	13.1755464	14.5856283	8.928025058
Mlu_00395	5.098897818	4.550247416	5.758086528	3.352182966	4.750195946	4.708286102	4.86587049
Mlu_00396	2.284739051	1.923359596	2.329978145	1.850488719	2.629362111	2.427026227	2.454102225
Mlu_00397	4.591850401	4.16399917	4.593240095	3.200201768	4.381606026	4.493044985	3.43620608
Mlu_00398	2.304548927	1.701786074	1.637384208	1.824431162	2.013442078	2.166951743	1.985267624
Mlu_00399	20.7381031	20.00785016	19.39226182	15.33408539	17.66533466	17.27766417	32.51238538
Mlu_00400	1.896915308	2.57082578	3.266422496	1.859145198	3.175331228	1.551696182	5.707366603
Mlu_00401	3.241825297	3.042679523	3.056772838	2.10408382	2.600932099	2.700881971	2.001565559
Mlu_00402	0.127124215	0.146444112	0.190264996	0.070602702	0.08511956	0.103122338	0.026009082
Mlu_00403	2.82501714	3.444001077	3.270985096	1.90177955	2.178170282	2.499966066	2.136799232
Mlu_00404	0	1.41542784	0.984389978	1.108895197	0.534759544	0.555309541	0.653603233
Mlu_00405	18.94711323	16.75830318	17.49253076	12.57532705	14.9978014	12.1594373	10.77007024
Mlu_00406	12.75330779	14.31683659	16.2821929	11.21630569	16.68737489	13.38488471	11.53425426
Mlu_00407	1.499225759	1.470858777	1.414203629	0.743433364	0.537775915	0.465368189	3.943739733
Mlu_00408	2.195529329	1.851776295	2.864494222	1.579292778	1.771178106	1.931203882	0.703560168
Mlu_00409	0	0	0	0	0	0	0
Mlu_00410	2.811135422	3.339646385	3.100465585	2.659286372	2.688962912	2.058423094	3.728972048
Mlu_00411	6.835471869	6.44710196	5.630549248	8.309517178	7.09612929	8.720198568	6.722446321
Mlu_00412	105.7124527	286.6472992	122.8518693	103.7925905	250.014671	231.4462857	125.753262
Mlu_00413	0	0	0	0	0	0	0
Mlu_00414	0.838382826	0.926882427	0.899797397	0.753867516	0.982384511	0.855896465	0.914824617
Mlu_00415	0	0	0	0	0	0.042731922	0.150887317
Mlu_00416	6.817170971	6.283965486	7.347104714	5.983849556	6.361620608	7.355232035	5.450804321
Mlu_00417	3.272917042	9.037985053	5.896996942	2.536359599	7.00761647	6.174346635	1.557267726
Mlu_00418	3.874057101	4.174455839	4.202022891	2.797064006	3.034959947	3.411976534	2.346142949
Mlu_00419	7.293819708	7.45339217	6.75307838	5.769523261	5.86305797	4.306228078	9.220831403
Mlu_00420	3.685857914	3.71980543	3.206410222	3.65547314	3.035993429	3.18656164	3.321679825
Mlu_00421	0.657086056	0.98257636	0.819542754	0.570210633	0.733283791	0.761462774	1.484409156
Mlu_00422	0.175478417	0.103665138	0.154491787	0.162429719	0.244784298	0.237244921	0.478695326
Mlu_00423	5.189175137	5.007485812	5.265467278	4.457303687	5.668238816	5.631252809	4.048793025
Mlu_00424	1.278705659	0.834920838	0.849270181	0.840993306	1.107793572	0.98788355	0.275387183
Mlu_00425	0.017555569	0.031113235	0.046367945	0	0.073467626	0.03051635	0
Mlu_00426	1.964544462	4.096125088	4.069627139	3.690403217	3.095095237	4.151461937	4.019375708
Mlu_00427	0	0.058011624	0	0.090896631	0	0.037932474	0.133940367
Mlu_00428	1.586813788	0.527299685	1.397036182	1.377016126	2.822253352	1.264227095	1.217457962
Mlu_00429	0.838803529	1.648173274	1.22010638	1.215280972	1.678827985	1.373542809	3.357698277
Mlu_00430	8.511368593	10.33780333	9.026843579	4.608441208	7.536354082	8.549533245	6.65627981
Mlu_00431	0.014922036	0.026445901	0.013137411	0	0.012489331	0	0
Mlu_00432	1.838754835	1.716452924	1.544700309	1.948882138	1.62122285	1.520864661	2.412284683
Mlu_00433	0.457734747	0.54082019	0.201495603	0.317772952	0.319259429	2.961650886	0.624337417
Mlu_00434	1.305783489	1.157101486	1.32772571	0.919281178	1.508516266	0.895135003	1.015952327
Mlu_00435	2.904671888	2.54942007	2.679058249	2.38140091	2.570051695	3.686651186	1.867748789
Mlu_00436	28.35703247	37.01015863	34.23482583	13.65283701	39.07181837	42.96164577	12.29438428
Mlu_00437	1.744284933	1.315911062	1.618683728	1.145478118	1.558561337	1.065311812	0.482261343
Mlu_00438	0.2485818	0.304999242	0.370365348	0.053099327	0.160043144	0.088636458	0.117366451
Mlu_00439	2.32858469	1.252804216	1.537570329	1.154694373	1.740143696	1.927482429	0.850747638
Mlu_00440	4.19838047	3.253089312	3.529848588	3.342856635	3.380698753	3.452968326	1.730154987
Mlu_00441	2.5063158	2.232503512	2.63179304	2.295778309	2.272526707	1.779977201	1.753784695
Mlu_00442	1.87651359	1.790757076	1.779172618	1.135714241	2.094119922	1.97943792	0.787542201
Mlu_00443	1.139798499	1.117464782	1.451846908	0.976475304	1.319333764	1.545679112	1.041948512
Mlu_00444	2.98979841	2.727751032	3.629048828	2.087887869	3.479638777	3.290460369	2.207912093
Mlu_00445	0	0	0	0	0.017117572	0	0
Mlu_00446	0	0.112369844	0.11164292	0	0	0	0
Mlu_00447	0.049885756	0.176822217	0.043919587	0	0	0.028905001	0.102064169
Mlu_00448	187.8967581	155.4594573	183.5791524	168.5141359	161.8848133	174.3502347	65.69091798
Mlu_00449	0	0.05243259	0	0	0.049523591	0	0
Mlu_00450	0.043429953	0.038484835	0.038235876	0	0	0.100657416	0
Mlu_00451	8.318495507	7.694564365	7.858892451	7.031231103	8.279390169	8.66593714	5.707243731
Mlu_00452	3.114741909	2.341889699	2.077446382	0.786307504	1.658969948	0.710964488	1.931100461
Mlu_00453	15.89157979	14.12593296	17.3989247	12.67223885	14.57396417	13.20643841	13.23312379
Mlu_00454	4.475487582	4.432464995	5.099126714	4.167055931	4.318755363	4.805055617	6.248074012
Mlu_00455	3.934256305	3.694421764	3.680861945	3.293838149	3.312522532	2.864813591	4.445148888
Mlu_00456	4.994604564	5.445590028	5.345696665	3.467401696	5.737729517	5.63193818	4.307905171
Mlu_00457	0.068691758	0.060870226	0.060476454	0	0.076657467	0.026534432	0.04684682
Mlu_00458	0.084111174	0	0.07405176	0	0	0.048736027	0
Mlu_00459	2.330093101	2.041045804	2.381535632	2.194012392	1.367398043	2.700223419	2.739812021
Mlu_00460	0.43107951	0.491136407	0.451814103	0.228013792	0.292077502	0.261671966	2.435918877
Mlu_00461	4.253490903	4.15987723	2.557415962	6.662027666	4.536898298	6.957914396	0.849020905
Mlu_00462	0.865206086	1.073366112	0.875989891	0.720781878	0.724153549	0.626651392	0.708070169
Mlu_00463	5.733644226	5.75990251	6.097487052	5.005138921	5.749179066	5.443820488	4.181273822
Mlu_00464	1.186568346	1.177635963	1.128231452	0.724900632	0.675324909	0.550020879	0.194213532
Mlu_00465	6.256926478	4.766312956	5.91129589	5.004194891	5.895311709	5.925748069	4.604015725
Mlu_00466	0	0	0.023541606	0	0	0.015493546	0.218832149
Mlu_00467	0.522449429	1.097389366	0.442930444	0.671666282	0.744988252	0.773617019	0.712606437
Mlu_00468	2.160616989	2.244162349	2.572667076	1.696680584	1.956604215	2.411472136	3.15234651
Mlu_00469	3.88708187	4.60977989	4.239441688	2.685101293	2.104176085	3.137488133	5.024907743
Mlu_00470	5.724655468	6.207837098	7.019186265	3.556840237	5.819664836	7.179265444	6.096868553
Mlu_00471	6.896117129	6.166115154	8.046386887	7.008189917	7.423445393	5.789060015	5.609668761
Mlu_00472	0.838836414	1.327362447	0.844016449	0.707133168	0.752231639	0.503400534	0.735524648
Mlu_00473	7.122671374	7.97048619	9.191848516	5.557581574	7.044226036	6.093566172	4.857562461
Mlu_00474	0.146441493	0.324417621	0.322318954	0.101664	0.36770243	0.403045603	0.786484552
Mlu_00475	2.331502716	3.447684234	3.130310787	1.719760271	3.171030276	2.794733281	1.878249291
Mlu_00476	72.52718716	70.80507973	89.71633629	54.86611949	80.6114943	64.26763474	63.10386582
Mlu_00477	2.496697755	2.686501794	3.642567501	1.881848125	2.686714615	2.252635161	4.23245808
Mlu_00478	0	0	0	0	0	0	0
Mlu_00479	0	0	0	0	0	0	0
Mlu_00480	27.27336199	21.751112	21.33754481	26.07724288	24.48719821	18.42467328	18.64232505
Mlu_00481	26.61534231	18.61114056	20.44343095	20.80251132	21.63226208	17.49351147	14.72477256
Mlu_00482	35.2187449	37.9965251	37.63656786	26.22944946	36.24741783	27.42839033	31.26307293
Mlu_00483	0.925779553	1.025457996	1.141083193	0.578433106	1.355990762	1.019195777	0.56823186
Mlu_00484	4.358131379	3.546804252	3.732562281	3.329363495	3.815518149	4.242134138	2.592889225
Mlu_00485	0	0	0	0	0	0	0
Mlu_00486	6.48708563	6.320106705	6.87874544	4.87674643	7.379335579	5.939276156	6.08619537
Mlu_00487	3.783970534	3.642173081	4.106837156	3.668662992	3.549312238	3.704607981	3.670702497
Mlu_00488	9.303651689	9.730107737	9.586516039	8.377728473	10.0969679	10.95690118	11.37529751
Mlu_00489	15.39313394	14.26364463	17.36591254	10.25358604	12.89700573	11.03084933	9.647605095
Mlu_00490	5.093561682	6.072826568	6.685816014	5.850639247	6.937340532	6.197796244	2.84214925
Mlu_00491	3.064082121	2.715192837	3.591609608	2.621868237	3.742456602	3.922400905	1.676588669
Mlu_00492	2.75495324	3.42505509	4.452728642	1.998207188	3.785673997	5.33683625	1.850797274
Mlu_00493	64.53405875	54.10973011	65.35799378	54.25609552	58.18527685	53.35534084	68.93084438
Mlu_00494	3.193182689	2.960863271	3.289497661	2.902410259	2.465960779	2.079097996	2.323634778
Mlu_00495	0.053522213	0	0	0	0.022398305	0	0
Mlu_00496	0	0	0	0	0	0	0
Mlu_00497	19.66524487	23.84621109	24.78542385	18.39453317	17.6720537	18.47110615	21.17593029
Mlu_00498	0	0	0	0	0	0	0
Mlu_00499	2.355261937	1.930550759	2.073580509	1.34895111	2.193059076	2.388216487	1.023988051
Mlu_00500	1.448454003	1.604408669	1.753432674	2.011118919	4.243105697	2.412898133	0
Mlu_00501	1.735718376	1.382044855	1.594572814	0.960496768	1.547492694	1.960418919	1.080802166
Mlu_00502	0.784045161	1.042155719	0.862844987	0.680384074	0.984336151	0.567868164	1.604123569
Mlu_00503	6.659169835	6.465523768	7.835102203	5.422027616	7.035735214	8.324318466	6.34963512
Mlu_00504	1.861159553	1.904479633	1.71659831	0.707563138	1.075581716	1.437867186	0.407984412
Mlu_00505	0	0.059476564	0.118183616	0.093192	0.16853028	0	0
Mlu_00506	0	0.133974512	0	0	0	0	0
Mlu_00507	0.524588111	0.898722182	0.975014835	0.291347622	0.858617429	0.317468191	0.405463339
Mlu_00508	0	0.060640369	0	0	0	0	0
Mlu_00509	2.82733486	2.631156415	2.633356973	2.470575507	2.585681434	3.080369929	1.697414146
Mlu_00510	12.39093331	12.39616803	21.85881987	6.495829992	14.96506596	7.971372653	8.19772002
Mlu_00511	0.940781797	1.55858253	1.728558157	0.880290087	1.215347636	1.125773729	2.05033061
Mlu_00512	14.10892843	12.37277168	11.86947912	12.33423535	10.42671769	8.998611483	4.190955742
Mlu_00513	0	0	0.026761615	0	0	0	0
Mlu_00514	4.622993557	3.326935804	3.655688951	3.28333226	3.062623556	4.123533153	2.075126878
Mlu_00515	17.88528593	14.53845881	19.1352258	11.8624759	20.43079909	23.908714	10.18060338
Mlu_00516	1.741353214	1.175676502	1.557428023	1.995642339	2.151495135	1.905854376	1.35723267
Mlu_00517	0	0	0	0	0	0.011438343	0
Mlu_00518	0.205880178	0.091218897	0.271886399	0.071464044	0.129237008	0.149114878	0.105305556
Mlu_00519	8.395611285	9.531226319	10.39022104	7.135222048	10.77790548	9.41762368	4.706883714
Mlu_00520	0.689531242	0.672120145	0.951069469	0.446780051	0.34627114	0.58597866	0.470250683
Mlu_00521	4.531696511	3.996267678	4.362952756	3.633165636	3.566553806	3.125517391	4.86014504
Mlu_00522	0.438690643	0.437671722	0.410532562	0.357795326	0.362036655	0.343064731	0.401697426
Mlu_00523	0.544997953	1.263079582	0.33218171	0.611186653	1.070193863	1.396740717	0.686180303
Mlu_00524	0.014010647	0.012415336	0	0.019453208	0.023453047	0.010824139	0.047775328
Mlu_00525	45.0654308	48.23870327	48.43301799	27.1518974	48.3657878	50.65569071	31.91074685
Mlu_00526	0	0	0	0.146444572	0.088277766	0.061113431	0
Mlu_00527	0	0.075859055	0.030147328	0	0.014330068	0.0099205	0
Mlu_00528	2.512168943	2.090176384	4.237726817	0.905293718	2.856989515	1.200045554	1.96175285
Mlu_00529	3.868683489	4.97274303	5.240002954	3.423598634	7.579010499	6.70019036	3.218253667
Mlu_00530	0	0	0	0	0	0	0
Mlu_00531	0	0	0	0	0	0	0
Mlu_00532	0.109710227	0.178233291	0.11268746	0.101552097	0.045912212	0.042379154	0.149641687
Mlu_00533	1.154589909	1.56600527	1.389914765	1.275937283	1.360792371	1.556442061	1.012389689
Mlu_00534	5.4938964	5.470606885	5.734403651	4.403822455	5.764390634	4.856986281	2.73474902
Mlu_00535	1.600381199	2.212321896	2.057112225	1.111031797	1.446632754	0.908753186	0.654862584
Mlu_00536	1.725917595	2.840309373	2.82193533	2.225196745	3.81772676	4.214445695	1.008901465
Mlu_00537	0.81869816	0.944808222	1.022508395	0.634453275	0.812711925	0.540564932	0
Mlu_00538	11.53425216	11.11327013	11.57332834	9.30344714	9.848353189	8.501022163	13.13850696
Mlu_00539	3.511027309	3.246518572	3.743903372	1.937855316	3.358437357	4.384642975	2.186256696
Mlu_00540	0	0.012690043	0	0	0	0	0
Mlu_00541	0.69688335	0.988053246	1.717907628	0.338657873	1.312362173	0.787392239	1.069345615
Mlu_00542	0.179929129	0.063776657	0.190092251	0.174876946	0.090357421	0.177233914	0.478565703
Mlu_00543	1.444868939	1.473475512	1.449730513	1.199201726	1.371458149	1.445207921	1.321180491
Mlu_00544	8.837591206	9.982910398	8.763183722	9.464720008	8.343511136	6.510120025	6.911639091
Mlu_00545	0.298306745	0.330425354	0.328287823	0.414186669	0.436930357	0.302480618	0
Mlu_00546	0.26109166	0	0.114932986	0	0.218526493	0.226924135	0.267091302
Mlu_00547	0.716204128	0.564136988	0.350304731	0.276227786	0.599443033	0.391931045	0.407034349
Mlu_00548	0	0	0	0	0	0	0
Mlu_00549	0	0	0	0	0	0	0
Mlu_00550	1.726375155	1.935668868	1.426850979	1.516470039	2.093671511	1.857705725	1.513753405
Mlu_00551	2.619806815	2.555999999	2.648188442	2.033077572	2.613528124	2.581075012	2.057379512
Mlu_00552	27.56206733	23.82540192	23.36917117	23.29939729	24.3657222	27.30313538	17.23430761
Mlu_00553	0.01902314	0.022476113	0.04466143	0.008804283	0.005307281	0.029393233	0
Mlu_00554	14.35115799	11.93314548	12.72134741	11.65534152	11.60016856	11.51626556	12.87095597
Mlu_00555	1.739471921	2.003830827	3.522304903	2.656703887	2.329423771	1.914994159	12.81199217
Mlu_00556	0	0	0	0	0	0	0
Mlu_00557	0	0.054978336	0	0.086143866	0.025964049	0.107847231	0.126936949
Mlu_00558	1.979117799	1.194054208	1.557057912	1.169329283	1.409759	0.975955932	1.723060488
Mlu_00559	0	0	0	0	0	0	0
Mlu_00560	8.013323173	9.517762505	16.02240144	4.122045003	7.939227049	3.929862218	4.938230021
Mlu_00561	5.634692671	5.108151305	6.378174421	4.722966212	5.020345164	3.686150086	2.443796692
Mlu_00562	87.21923222	107.6905049	92.89177109	95.20149823	124.506659	116.971392	68.71474114
Mlu_00563	0.20441991	0.120762533	0.189970417	0.252292136	0.133072961	0.105285145	0.44146983
Mlu_00564	0	0	0	0	0	0	0.25502118
Mlu_00565	0	0	0.030977437	0	0.014724647	0	0
Mlu_00566	0.55805014	0.724101297	0.666776792	0.442759834	0.6505653	0.508117668	0.326213491
Mlu_00567	3.844089188	8.17532404	3.384349015	5.489856026	6.802494955	7.509375965	3.820067822
Mlu_00568	1.558815831	2.247575595	2.046949634	2.054300002	1.547932198	1.408403364	1.513552775
Mlu_00569	1.844138109	1.512464257	1.84812378	1.253015559	1.674853628	1.284518793	3.010395759
Mlu_00570	2.060127071	2.073084853	2.213381024	1.502923013	2.221092713	2.164822061	1.357351538
Mlu_00571	4.589835087	3.939775252	3.867259386	3.468810148	3.029918275	2.071379106	6.086662425
Mlu_00572	4.202936076	4.537439234	5.446185316	3.246568532	5.697749792	5.60800798	2.967271337
Mlu_00573	0.173739277	0.145159072	0.144220034	0.124061067	0.170343246	0.163946161	0.081248751
Mlu_00574	10.15374468	8.67966031	8.497159526	9.5149435	8.4383439	6.049635692	1.247916324
Mlu_00575	1.161561433	1.038920797	1.280692579	0.994799103	1.081225962	0.912058801	0.777361793
Mlu_00576	0.122899804	0	0	0	0	0.047474059	0
Mlu_00577	0.008073855	0.014309064	0	0.067261298	0.094606306	0.711084101	0
Mlu_00578	6.359496897	6.916943491	7.770467069	4.868823565	8.183064644	8.201936271	7.397369924
Mlu_00579	0.935884893	1.658642201	0.926950724	6.659618482	7.049787786	30.02842861	0.957390651
Mlu_00580	1.016688069	0.868747842	1.022966385	0.932683873	1.185237546	1.125589175	0.557169969
Mlu_00581	9.086182742	8.269202327	9.458875058	6.36472375	6.423043486	6.403076445	15.11480122
Mlu_00582	0.070018785	0.031023076	0.154111934	0.048609105	0.087905678	0.02028528	0
Mlu_00583	0.395663387	0.596562832	0.499118863	0.418171356	0.553579734	0.516683318	0.217480493
Mlu_00584	3.444277917	3.289018784	3.724672057	2.882445116	3.382971143	4.173649556	2.348949465
Mlu_00585	1.589315289	1.741231691	2.45502757	0.762314211	1.426955668	0.719966447	0.059121319
Mlu_00586	1.691318847	1.724038675	2.26762725	1.227883286	1.646892143	1.364300666	0.995138378
Mlu_00587	5.862676718	5.968870096	6.451900309	4.788795239	5.846516955	5.399022292	4.593749774
Mlu_00588	0	0	0.069977141	0.110358948	0.133050221	0.04605438	0
Mlu_00589	0.539951873	0.418661846	0.921039916	0.234281565	0.367188879	0.07821526	3.866516231
Mlu_00590	0.171417941	0.24395992	0.269821179	0.079335591	0.147819711	0.09631385	0.265692371
Mlu_00591	46.1297547	37.35459317	47.70969975	41.31963718	70.67979317	107.1866612	39.70605698
Mlu_00592	0.233971223	0.207330275	4.119780994	0.649718876	0	3.795918741	22.97737563
Mlu_00593	0.570857624	0.687966026	0.944859737	0.50727192	0.344010263	0.555691197	0.420462286
Mlu_00594	7.018932444	6.592396868	8.235066374	6.463440816	8.120128766	9.032970565	5.400000871
Mlu_00595	1.363668099	1.428103313	0.982291065	2.40977822	1.141352459	3.160567736	0
Mlu_00596	0	0.045016665	0.044725451	0	0.042519107	0.117741473	0.103936906
Mlu_00597	0	0	0	0	0	0	0
Mlu_00598	1.769320848	2.264684544	3.980829801	2.729588178	0.987248388	1.594735092	0
Mlu_00599	4.735362412	4.669935715	4.437998561	2.969289945	4.15514312	4.248437133	2.500220183
Mlu_00600	7.838894063	6.934327492	8.736991128	6.692051474	9.291828418	11.58652377	4.154934978
Mlu_00601	51.13373318	41.51221391	48.53969959	46.10151205	52.09534654	55.73227433	19.28122801
Mlu_00602	0.026632396	0	0	0	0	0	0
Mlu_00603	2.905607882	2.809722515	3.161158748	2.630743003	2.815656368	3.146307812	2.36207829
Mlu_00604	1.035934948	2.579083957	6.601436747	0.034246503	0.165152168	0	0
Mlu_00605	7.286989206	6.20816876	5.787266709	8.526476681	5.664657554	10.33638326	5.087598221
Mlu_00606	3.827537278	3.786103565	4.897931189	3.08975487	2.793787301	2.424070584	5.463475116
Mlu_00607	0.80348038	0.996789811	1.414773643	0.446239809	0.874238093	0.512111338	1.808275934
Mlu_00608	9.967985834	9.696147557	10.97695666	7.370888419	9.715299209	9.039800761	8.137703581
Mlu_00609	6.445556449	2.596199213	3.71434223	2.278026677	5.394752362	5.907631661	2.157928135
Mlu_00610	3.402448993	2.172596468	2.114490004	3.195755798	2.387089288	2.580293731	4.606721582
Mlu_00611	0	0	0	0	0	0	0
Mlu_00612	0.176067375	0.093611762	0.093006185	0.635602038	0.088418112	0.122421181	0.288181182
Mlu_00613	2.049804444	2.04345572	1.804654708	1.778793324	2.430475252	2.820801165	2.970618293
Mlu_00614	26.86595611	19.92379309	24.7892261	25.88592185	23.45965752	26.30471555	13.82315979
Mlu_00615	6.486637446	5.368005801	5.356878603	5.917447676	6.606944454	7.982957329	5.621145998
Mlu_00616	0	0	0	0	0	0	0
Mlu_00617	3.827457991	3.974404823	3.416025848	2.556692648	3.819952971	3.772411609	2.206622475
Mlu_00618	0.022984375	0.020367277	0	0.031912861	0	0.026635394	0.611325888
Mlu_00619	0.0481506	0.021333985	0	0.066855131	0	0.013949805	0.492570552
Mlu_00620	27.98981777	52.58189219	23.31164366	39.95086886	45.91633756	64.15829055	24.7389099
Mlu_00621	7.310398818	7.259399771	7.926169402	5.588527988	7.749434961	7.952463691	3.28816147
Mlu_00622	9.940633582	10.27972714	10.60408292	7.959693213	10.16982943	9.294034719	8.490671484
Mlu_00623	0.545026609	1.086677068	0.359882441	0.882871583	0.532200885	0.763186865	0.55755081
Mlu_00624	15.91592514	15.19331314	18.14875729	14.65724043	15.28247176	15.03627259	18.20412804
Mlu_00625	0.366305553	0.259677169	0.193497983	0.305160134	0.459881416	0.233470825	0.524612077
Mlu_00626	0.120178576	0.203307754	0.173136472	0.030338731	0.100586142	0.151929477	0.134116546
Mlu_00627	18.14911942	17.58562957	22.71716122	12.01088475	20.40754353	21.80602878	13.92462689
Mlu_00628	0	0	0	0	0	0	0
Mlu_00629	0	0	0	0	0	0	0
Mlu_00630	0.065978646	0.01948868	0.116175642	0.040714952	0.024543245	0.038229607	0.164987224
Mlu_00631	3.637048922	3.757843579	4.225138101	2.828778301	3.59988028	3.401559966	4.538853612
Mlu_00632	1.382148316	1.837156639	2.064954205	1.221217579	2.226001907	2.15986768	0.257074326
Mlu_00633	1.856084564	1.362787028	1.960923691	0.736313491	1.686647818	1.044732395	1.952985239
Mlu_00634	0	0	0	0	0	0	0
Mlu_00635	5.409579042	5.389538006	6.355953235	3.446536715	5.405058807	4.84778039	4.329987663
Mlu_00636	1.91506449	1.931977415	2.062143407	1.602210974	1.833009656	1.49089313	1.898791775
Mlu_00637	0.809499193	1.083620443	0.924975194	0.825031823	1.009084883	0.8881882	0.475717439
Mlu_00638	14.75527826	14.78568048	15.46773904	11.58361423	17.55254073	19.22229541	7.83165351
Mlu_00639	0.941187357	0.166803961	1.657249012	1.045440005	0.78774777	0.981623665	2.310755906
Mlu_00640	4.433067527	4.846326388	5.345258996	2.241270989	4.557283652	3.992537344	2.711102606
Mlu_00641	0	0.074533922	0.02468392	0.038928304	0.046932483	0.048736027	0.057362647
Mlu_00642	2.687684369	3.700722846	3.385552446	3.157625653	4.360603024	4.144836865	4.060718531
Mlu_00643	0.179803114	0.267112017	0.25141648	0.242306618	0.106228398	0.11643896	0.205574212
Mlu_00644	1.599634931	2.036949704	1.419413124	1.26790936	1.591861221	1.430440045	1.559083136
Mlu_00645	1.361957834	1.276507252	1.68331296	0.981877088	1.205685688	1.183726448	1.446841055
Mlu_00646	3.588812776	3.714250718	4.220843443	3.157116749	3.657221731	4.627159774	2.606328786
Mlu_00647	4.803687983	4.697654979	6.048911162	4.304761817	5.558295625	5.444763135	3.719815635
Mlu_00648	19.17041441	18.64803152	15.60869736	17.81159904	17.13086538	20.12766209	19.7583832
Mlu_00649	10.90907022	9.552805569	8.697391471	11.34094012	12.13306039	13.20689668	4.968253147
Mlu_00650	2.376661153	2.623446452	4.431008014	1.210342639	2.739451365	1.367564289	1.564764968
Mlu_00651	7.865900331	7.335632132	7.204405561	5.504778069	8.733810283	7.920825734	5.061603271
Mlu_00652	4.587177118	4.769242217	4.942505109	4.115776797	4.69868722	4.078036422	3.286504381
Mlu_00653	2.812519427	2.302802997	2.649916557	1.621402404	2.519193969	2.706538384	0.841271488
Mlu_00654	0	0	0	0	0	0	0
Mlu_00655	0	0	0	0	0	0	0
Mlu_00656	1.221467415	0.73963043	0.806538007	1.130638241	0.834906444	1.1677833	0.624767796
Mlu_00657	0	0	0	0	0	0	0
Mlu_00658	0.109020225	0.048303362	0	0.075685054	0.015207819	0.021056309	0
Mlu_00659	24.2197253	21.96818179	24.69203782	25.26828349	23.57262102	24.16323983	19.09006648
Mlu_00660	0.665711072	0.589910408	0.586094261	0.239636573	0.4746363	0.228580105	0.353115513
Mlu_00661	3.755293228	4.621805192	5.234773527	4.779564606	4.365384029	2.901209031	2.77447903
Mlu_00662	3.401199654	5.58678734	4.272536919	2.706756417	4.200633019	3.629039132	1.697246847
Mlu_00663	0	0	0.156979133	0	0	0.034437801	0.243201203
Mlu_00664	2.511979073	2.490949157	3.317332203	0.664339013	2.402807958	1.420846015	1.223667619
Mlu_00665	0	0	0	0	0	0	0
Mlu_00666	3.315184447	3.831787298	2.918699507	3.001954895	3.136637323	2.589035373	1.179604967
Mlu_00667	2.463103964	3.323572431	3.449926123	2.953566181	3.46715202	2.984106537	2.863299757
Mlu_00668	0.519123651	0.460014048	0.253910113	0.320347501	0.289661419	0.033421408	0
Mlu_00669	0.102701433	0.091007416	0	0	0.171916515	0.059507668	0.210122832
Mlu_00670	0	0	0.095381886	0.050141348	0.030225539	0.041849415	0
Mlu_00671	1.050394342	0.946568158	1.436790639	0.403745998	0.685439758	0.639570585	1.311292581
Mlu_00672	0.444566196	0.472735222	0.678422455	0.411507941	0.421701549	0.480838948	0.363825528
Mlu_00673	0	0	0	0	0	0	0
Mlu_00674	0.354388413	0.549563449	0.312004747	0.246026881	0.44491994	0.308011692	0
Mlu_00675	0.047632851	0.084418349	0.041936122	0.066136258	0	0.082798842	0.194909638
Mlu_00676	6.417261645	21.71233997	8.731476137	9.558111932	14.35540633	11.25635354	14.5617521
Mlu_00677	4.887515659	5.223651941	4.992776698	4.506809094	4.590344695	3.134594003	5.114326028
Mlu_00678	0.183938623	0.162994597	0.24291027	0.319239033	0.115463652	0.05328922	0
Mlu_00679	9.987473852	19.21153577	13.22525215	7.328193761	14.11329546	7.653243674	7.808095975
Mlu_00680	3.775326552	3.059752228	3.644287724	3.393507419	3.333939919	4.284635958	3.468424482
Mlu_00681	1.724560208	1.412422213	2.047416131	1.197240525	1.465279001	1.286914758	0.641523268
Mlu_00682	1.342333435	1.28003909	1.083652725	1.180175781	1.438385799	1.297197291	1.08333845
Mlu_00683	4.271019964	3.537568158	3.220039401	5.133550464	4.501753203	5.078739377	4.858249526
Mlu_00684	0.017210005	0.030500802	0	0	0	0	0
Mlu_00685	0.692662471	0.867776321	0.94627608	0.198979325	0.81963145	0.705813996	0.293205189
Mlu_00686	23.1274467	21.85861243	28.34236391	21.66316711	21.66723146	24.84834158	13.43444721
Mlu_00687	6.931591543	6.955938532	7.355129355	5.692495557	5.900461962	5.757178663	5.365814735
Mlu_00688	7.703125151	8.72542775	9.199736753	6.789300273	6.559429563	5.006742475	3.015008462
Mlu_00689	0.608372784	0.479200799	0.595126044	0.375422504	0.622344779	0.313338446	0.138300582
Mlu_00690	0	0	0	0	0	0	0
Mlu_00691	0	0	0	0	0	0	0
Mlu_00692	0	0	0	0	0	0	0
Mlu_00693	0	0.022312163	0.04433565	0.034960243	0	0	0
Mlu_00694	2.832283228	4.27755094	2.124939671	3.658943145	2.803424383	2.582937188	5.442010018
Mlu_00695	4.23666799	4.794405314	4.76339017	3.819765958	4.282799591	4.1763937	7.129561074
Mlu_00696	5.464237582	4.722499547	6.176743728	5.104745567	4.57341563	5.198674499	3.726533763
Mlu_00697	0	0	0	0	0	0	0
Mlu_00698	1.933944992	1.974524076	2.331892488	1.488536571	2.269640632	2.436030466	2.150418736
Mlu_00699	0	0	0.080783738	0	0	0.008861096	0
Mlu_00700	3.458603493	3.757519383	5.109703415	1.282760477	3.152507598	1.400053146	1.211670878
Mlu_00701	0.876510286	2.589023788	1.139150499	0.927236989	2.305646675	2.515170853	2.988838905
Mlu_00702	0	0	0	0	0	0	0
Mlu_00703	2.909006268	1.492395806	2.156714843	1.913227474	2.691048026	2.483965259	0.626495265
Mlu_00704	18.5592915	18.04839806	21.65792523	13.8776377	21.23814159	19.99911443	11.83053125
Mlu_00705	3.967918391	3.288704115	4.049526856	2.686122365	3.717579715	3.77465309	2.625286902
Mlu_00706	12.06947825	12.50822379	17.08754813	11.10248425	11.35865525	11.45255338	9.024894359
Mlu_00707	1.172805829	1.30650485	1.593065086	1.25618869	1.51447786	0.640720237	0.617017273
Mlu_00708	3.825436234	4.474609876	4.68141838	3.133762087	4.290390904	4.07845073	2.895872471
Mlu_00709	3.496002372	3.498345917	3.747909567	3.136974818	2.985772684	3.541473017	1.897648327
Mlu_00710	0.647310474	1.321785388	1.461902803	0.78153393	1.012894824	0.65229075	0.748557028
Mlu_00711	0.461443246	0.594765638	0.886377123	0.232980001	0.315994276	0.097225913	0.171653374
Mlu_00712	1.157938011	3.867571192	1.176291356	1.607749391	2.460180635	2.219253144	3.098044279
Mlu_00713	12.16793975	12.83050947	12.11911023	7.881040118	8.73340292	11.28457158	4.450519815
Mlu_00714	9.75008243	10.73237207	11.73594471	8.108451853	9.669400689	8.444722549	7.324751861
Mlu_00715	0.03847587	0	0.13549714	0.053422166	0	0.156056879	0.078720019
Mlu_00716	3.717068911	3.441865008	3.419599485	3.044408688	3.635423773	4.222819003	2.777094818
Mlu_00717	0.915619669	1.043181463	0.52973247	0.726457326	0.678765657	0.545690006	0.321140486
Mlu_00718	2.62445846	2.351182912	1.90432585	2.162345635	2.075906839	1.637648971	2.891286524
Mlu_00719	2.93339737	2.561716106	2.732287254	2.272561162	1.547826088	1.330184851	3.783622554
Mlu_00720	2.254857345	2.06055073	2.171294967	2.348082641	1.29748657	0.979888734	1.585836901
Mlu_00721	2.170967185	2.391230276	1.446892244	1.8311161	1.969874545	1.828084661	2.698233805
Mlu_00722	58.48447058	46.75582784	45.52100512	24.4056744	26.97327138	26.09075603	21.49701034
Mlu_00723	0.21869828	0.016149698	0.128361799	0.101217861	0.030507401	0.031679754	0
Mlu_00724	1.495500975	1.54608643	1.43633899	0.912375902	1.346518148	0.873093671	1.019910791
Mlu_00725	34.25511179	45.94607819	48.9966233	29.88832867	39.48610527	44.27107917	63.02992031
Mlu_00726	0	0	0	0	0	0	0
Mlu_00727	1.463369771	1.296744331	1.574656912	1.053540886	1.723792591	1.381781653	1.774218238
Mlu_00728	0	0.098794963	0	0	0	0	0.228103142
Mlu_00729	0	0.073145091	0	0	0	0.047827903	0
Mlu_00730	0.560609746	0.689967168	0.603243301	0.886492453	0.638653535	0.586499882	1.083262729
Mlu_00731	13.21580286	14.45263994	14.26894976	13.37102615	15.7601536	18.10506593	10.39638272
Mlu_00732	0	0.140395322	0.530050983	0.39596601	0.026521217	0.128521808	0
Mlu_00733	0.463987034	0.692472452	0.913740474	0.254300111	0.613175221	0.290069813	0.549593604
Mlu_00734	1.330521868	1.629825979	1.205848736	1.086691171	0.884337337	1.133729727	1.1209026
Mlu_00735	0	0	0	0	0	0	0
Mlu_00736	11.17468675	8.592896185	11.01719334	7.501340799	9.391551901	6.421369537	5.290597956
Mlu_00737	29.45962791	23.61073088	31.55589886	18.08842956	26.79382399	19.42142689	13.46100688
Mlu_00738	32.72803439	154.8503408	38.59312453	40.75967732	63.08566317	104.8159191	34.49464227
Mlu_00739	3.821381708	3.470220043	4.476541497	3.13526414	3.647751411	4.309455412	3.036894109
Mlu_00740	0	0	0	0	0	0	0
Mlu_00741	0	0	0	0	0	0	0
Mlu_00742	0.039623034	0.245779718	0.383726769	0	0	0	0
Mlu_00743	8.879937968	7.653737537	8.120671505	5.869819425	8.075601656	6.938467342	10.84284986
Mlu_00744	1.673340901	1.961132188	1.378168817	1.08673531	1.694201641	1.751488095	1.214820631
Mlu_00745	3.97898337	4.330633958	4.260539561	3.036071699	3.770338462	3.247111212	2.860292803
Mlu_00746	1.70817037	2.875974717	4.962800447	3.083241762	4.717981372	6.235455207	1.048453515
Mlu_00747	1.295840621	1.169555398	1.795801972	1.066205335	1.586704373	1.30701964	0.785551304
Mlu_00748	0.69151003	1.559782732	0.664153909	0.785563599	0.368311209	0.072850448	0
Mlu_00749	0.559953602	0.661593238	0.985970058	0.259157529	1.249775113	0.108150173	0.381880541
Mlu_00750	0	0	0.062938021	0	0	0.020710845	0
Mlu_00751	0	0	0	0	0	0	0
Mlu_00752	0	0	0	0	0	0	0
Mlu_00753	7.895015352	8.165405962	8.882681682	7.046190891	9.201845111	8.161680675	6.711078135
Mlu_00754	0	0	0.071516981	0	0	0	0
Mlu_00755	2.175121436	2.324281506	1.971307273	2.072594875	2.123935851	2.285869827	4.88650222
Mlu_00756	6.2166183	6.27488803	7.720377692	3.544067526	6.719283485	7.84819135	4.801189548
Mlu_00757	0.767779518	0.577272531	0.716922673	0.710686894	0.739975391	0.714487906	1.094831186
Mlu_00758	8.751287291	8.578350546	8.591039808	6.666812339	8.945068729	9.243940644	4.119680984
Mlu_00759	4.586664192	4.481269593	4.417766334	2.122798311	4.5607575	4.247653866	4.010308923
Mlu_00760	14.62945994	15.26565137	19.98178551	10.20366116	18.88163327	21.31047973	10.76965986
Mlu_00761	3.33788871	3.327550487	3.778313678	2.532434931	3.522083309	3.315518753	2.5609427
Mlu_00762	0.038835668	0	0.034191052	0	0	0.022502315	0
Mlu_00763	1.672812438	1.029402065	1.227291401	1.161315698	1.516772524	1.211584453	0.950695612
Mlu_00764	3.448492979	3.238270851	2.492291988	5.288339234	3.489399222	2.534952927	2.000805559
Mlu_00765	60.25592357	63.84718659	67.91689785	41.17421379	74.65300885	75.89102098	40.25612027
Mlu_00766	18.06708016	18.40987866	16.24695607	15.13532459	18.96541644	25.09905403	7.881627645
Mlu_00767	1.325115633	1.646478026	1.479430025	0.899935756	1.37831954	1.084940028	1.159106774
Mlu_00768	5.705997783	6.370614715	5.361557419	4.385261176	6.309263859	5.318216585	5.35515254
Mlu_00769	0	0	0	0	0.006179444	0	0
Mlu_00770	7.899791898	6.704739385	7.785576657	6.97276099	7.848150388	7.448511628	4.250248817
Mlu_00771	3.897199565	4.064677761	4.402748651	3.176428375	4.426106672	5.035831299	2.798959727
Mlu_00772	1.640687096	1.453871559	1.643080556	1.452242007	1.321714329	1.200199881	2.097985686
Mlu_00773	0.010548949	0	0.00928733	0.043940346	0	0.01833694	0.021582707
Mlu_00774	0	0.014884175	0.044363668	0.023321557	0.01405839	0.009732422	0.034365387
Mlu_00775	9.882771557	10.22612291	9.592524708	9.630844423	9.401887883	8.020396833	9.293543615
Mlu_00776	0.059328417	0	0.078349406	0	0	0.034376305	0.060691729
Mlu_00777	2.461030644	2.396018589	4.019798005	1.528675797	2.791590756	1.566701772	1.755682759
Mlu_00778	1.829973661	2.23518549	1.807061362	1.16741449	2.111175749	1.748112506	1.467262636
Mlu_00779	6.552813428	6.293402493	7.613437642	5.409328053	6.906436981	6.157865433	4.860938462
Mlu_00780	7.707947977	7.162797563	7.68082275	5.55731308	8.191761253	7.265452267	4.862192898
Mlu_00781	0.186128368	0.082467504	0.245802059	0	0.077892146	0.053923616	0
Mlu_00782	0	0	0	0	0	0	0
Mlu_00783	11.09482499	11.31268962	12.56180251	10.25859443	11.31358579	9.277967941	9.56552978
Mlu_00784	6.692875256	6.063972879	7.859513434	5.063731797	6.817700382	5.567385644	4.940262797
Mlu_00785	0.060905433	0.026985242	0	0	0	0	0
Mlu_00786	0	0	0	0	0	0	0
Mlu_00787	0	0	0	0	0	0	0
Mlu_00788	0.032838066	0.130945437	0.144553719	0.068391461	0.096195935	0.076108646	0.067185309
Mlu_00789	6.345933543	6.326278701	7.211103613	4.764124087	6.639213434	5.675812344	4.264933479
Mlu_00790	0	0.017506109	0.017392862	0	0	0.011446845	0.101047623
Mlu_00791	0	0	0	0	0	0	0
Mlu_00792	1.32691514	1.582844036	1.75233081	0.850323322	1.366881537	1.06455654	0.83532702
Mlu_00793	1.863949799	1.880140973	1.597383302	1.968545434	1.651355344	1.344276633	2.190770371
Mlu_00794	0	0	0	0	0	0	0
Mlu_00795	0	0	0.021747543	0	0	0	0
Mlu_00796	5.617725323	5.263071341	6.625947865	4.733576247	6.568275982	5.267705609	4.825570175
Mlu_00797	0	0	0	0	0	0	0
Mlu_00798	24.25528733	23.04331541	24.52955095	19.86010709	22.86558048	19.16038862	32.78765078
Mlu_00799	0.999040761	0.885285776	1.145471974	1.06453939	1.186193897	0.78079887	1.61618254
Mlu_00800	0	0.070139128	0.278741585	0	0.033123879	0	0.809705018
Mlu_00801	0	0.038840236	0.019294489	0.030428786	0	0	0
Mlu_00802	4.606727779	4.060813665	5.117500733	2.545105667	4.642993932	4.891292752	3.158172863
Mlu_00803	0.435723458	0.450461844	0.990998685	0.352907411	0.759767658	0.6732496	0
Mlu_00804	13.9752536	8.406168384	8.825014032	13.55460736	13.11949649	16.69182295	11.77000243
Mlu_00805	7.76292946	8.866980321	7.336124485	8.108602996	9.12014347	9.965812386	9.179867916
Mlu_00806	1.335860998	1.090649977	2.167189063	0.85445297	1.394457685	1.052332696	1.136239097
Mlu_00807	18.44459266	19.36783091	18.29082228	18.62087033	23.09987234	28.67546574	13.20099097
Mlu_00808	4.702547248	4.019151214	5.561014262	4.365740824	3.959191261	3.837247839	3.301955362
Mlu_00809	3.126581243	3.442016048	3.202065286	1.982301572	3.98537397	2.89766131	2.562005423
Mlu_00810	3.000589064	3.410365927	3.866878208	3.049171506	2.984574207	2.355946762	4.626552728
Mlu_00811	44.86071595	77.71201786	41.57423663	47.7691787	64.93120956	187.4258964	21.3930642
Mlu_00812	0.025337589	0.056131361	0.011153649	0	0.01060343	0.014681206	1.736628152
Mlu_00813	0	0	0	0	0	0	0
Mlu_00814	6.034918245	5.076698622	5.818109049	5.140798574	6.016467975	5.202700611	5.463012273
Mlu_00815	8.375003175	8.522365521	9.702883091	8.625423032	9.47457629	10.89186082	5.648870047
Mlu_00816	0.909677786	0.952661327	0.473249267	0.401879629	0.761375131	1.293764108	0.338393211
Mlu_00817	3.208680245	3.566628742	3.826049405	2.884104514	3.293364942	2.912724935	2.936895585
Mlu_00818	5.347571492	4.794489275	5.53428014	4.381468344	4.623380108	4.315652708	4.271979727
Mlu_00819	2.175000043	1.703885051	1.859373642	1.225465964	1.74126637	1.296775981	1.999256948
Mlu_00820	0.822600339	0.971914137	0.885157897	0.3807156	0.688493718	0.582553063	1.496005199
Mlu_00821	3.629109671	3.755322574	7.688806207	1.755477217	3.723343404	2.14349222	2.203550294
Mlu_00822	0.609613095	0.655957122	0.536705414	1.451010439	0.874678782	1.034442937	0.71271021
Mlu_00823	5.152592074	4.346733238	3.846832725	4.178030938	5.830604056	7.85792856	2.361405229
Mlu_00824	10.30265988	7.173222315	7.850933788	5.770011545	8.731734984	11.61314442	3.631223695
Mlu_00825	0.803945308	0.960197655	1.046307346	1.116245055	0.965436483	0.89114377	0.286058858
Mlu_00826	17.88612878	15.08835506	18.9569101	14.07357159	17.51049463	15.7058533	10.93532097
Mlu_00827	2.817487615	3.203700087	2.700041082	2.215626697	3.025956442	2.701603491	1.581400993
Mlu_00828	7.065872587	8.32395446	7.653330371	5.051764975	6.752483506	5.613068757	7.844720722
Mlu_00829	13.09323907	11.70472416	13.75145842	9.360299274	13.54429864	13.66747515	7.915372284
Mlu_00830	0.073585634	0.065206864	0.323925194	0.102170632	0.184767417	0.383735497	0
Mlu_00831	4.327110972	9.559756702	9.863218762	2.551349236	5.308478324	2.163775268	8.85308786
Mlu_00832	1.368043505	1.933862978	1.691937508	1.17586377	1.254063557	1.283382051	1.599405559
Mlu_00833	5.932841731	5.385105257	6.279495704	4.177918007	5.640510293	4.410043096	3.420196871
Mlu_00834	2.778542502	2.146888612	2.669979432	3.128656476	3.261460551	3.592946179	1.663838521
Mlu_00835	2.01160415	1.828555841	2.125227649	1.603739679	1.998663794	2.489059328	1.646263143
Mlu_00836	0.848631257	0.72693578	0.57280565	0.58914483	0.615576759	0.426154959	0.578754672
Mlu_00837	0.08987533	0.053094498	0.13187757	0.041596069	0.12537194	0.017358639	0
Mlu_00838	20.98875985	23.00621155	21.01828388	19.61217279	26.22563271	26.34007173	13.63565068
Mlu_00839	0	0	0	0	0	0	0
Mlu_00840	1.417402461	0.9545684	1.597293928	0.708481846	1.233779698	1.051234444	1.275976277
Mlu_00841	1.63940611	2.20668825	2.959757714	1.383036808	1.615301157	1.04610467	4.882632522
Mlu_00842	6.476396432	5.640584395	6.695590599	6.60285176	8.115359534	9.595880829	2.650087183
Mlu_00843	0	0.021964673	0.010911292	0	0.015559543	0.007181099	0.038034917
Mlu_00844	0	0	0	0	0	0	0
Mlu_00845	3.164182257	5.902937158	5.131657028	1.849826174	3.205876763	2.605362057	1.703627475
Mlu_00846	1.320155511	1.949728415	1.485121935	1.323820139	1.289089231	1.274882832	2.100764475
Mlu_00847	13.93966652	12.24165324	14.7490485	11.8037356	13.13204433	12.64064917	8.376943036
Mlu_00848	0	0	0	0	0	0	0
Mlu_00849	0	0	0	0	0	0	0
Mlu_00850	0.605124566	0.684539409	0.906814805	0.607797468	0.765096778	0.656486846	0.342441996
Mlu_00851	0.053500666	0.189635421	0.094204332	0.037141739	0.156725019	0.170497615	0.109460123
Mlu_00852	0.050762282	0.044982275	0.044691284	0.211444035	0.127459876	0.117651525	0.519287519
Mlu_00853	0	0	0	0	0	0	0
Mlu_00854	0.837092526	1.202191361	2.109284917	0.761486328	0.86973924	0.769360221	0.472456898
Mlu_00855	0.945876547	1.12629774	1.171058744	0.615614416	1.261728033	1.387285757	0.30237872
Mlu_00856	1.343693835	1.472365033	1.361077461	0.982984114	1.354398601	0.996232642	1.005062419
Mlu_00857	0.536535252	0.365725454	0.472367436	0.630348376	0.483608631	0.76524644	0.168881332
Mlu_00858	3.030283008	3.193261033	3.557161766	2.236378285	3.678723828	2.878909612	2.010756372
Mlu_00859	0.056768755	0.050304825	0.024989701	0.315284341	0.047513877	0.016446588	0.754952218
Mlu_00860	7.989865621	6.7553304	5.646804066	7.836763589	6.656620728	5.818753698	1.874647993
Mlu_00861	3.81122202	4.006563394	3.855598387	3.155314471	2.318116896	2.729530047	10.7519711
Mlu_00862	1.6992042	1.267979502	1.889665361	1.490068594	1.871298537	0.932740656	1.280816026
Mlu_00863	0	0	0	0	0	0	0
Mlu_00864	3.696494419	7.379957274	6.548021883	4.266719537	4.286678379	9.780196994	42.18807356
Mlu_00865	4.031395504	3.767866347	4.18494143	2.617702252	4.331019642	4.497454152	3.282812496
Mlu_00866	0.996432716	1.740721539	1.679331464	0.75104607	2.049224232	3.084735777	0.873711263
Mlu_00867	37.45880409	27.6141189	36.35553152	21.7448001	36.99640917	27.07510184	23.73720948
Mlu_00868	2.77656993	1.829541585	2.110210679	3.229102815	2.462949669	1.8150689	1.310941342
Mlu_00869	2.978257363	2.671325087	2.414220937	3.126605623	2.796709108	2.062390395	2.415063053
Mlu_00870	0	0	0	0	0	0	0
Mlu_00871	1.371999675	1.311133157	1.657919963	1.195272297	1.598649583	0.857319993	1.596167895
Mlu_00872	0.040966601	0.290415774	0.649208398	0	0	0.047474059	0.083815951
Mlu_00873	26.73378924	43.88806789	31.86831532	16.99998711	36.79928018	35.87708924	15.6328709
Mlu_00874	0	0.044982275	0	0.035240672	0.021243313	0.014706441	0
Mlu_00875	6.030833067	11.12158248	6.983753032	4.563969637	8.367259711	7.775847093	8.059146978
Mlu_00876	0	0.1082386	0	0	0	0.070774745	0.249907119
Mlu_00877	2.63888855	2.596726725	2.444853639	2.108923566	2.080265248	2.453568085	2.542578451
Mlu_00878	11.88595931	11.26043477	13.53783551	10.54928024	14.88188857	17.64446182	7.760068053
Mlu_00879	16.34872267	15.02868759	17.9111384	11.13438718	15.94957412	16.72863445	10.48280454
Mlu_00880	7.357140818	11.48660737	12.74887588	4.377894853	9.187714057	4.601229144	4.061759283
Mlu_00881	2.6204777	2.772301965	2.40124378	2.376114747	2.260408147	2.804331805	2.024197377
Mlu_00882	1.755225629	1.209730863	1.741535932	1.083137213	1.352481999	1.404455829	0.969031879
Mlu_00883	2.727834737	3.127602214	2.774087115	3.431926584	2.525412697	2.045067577	2.847467168
Mlu_00884	0.781352911	0.692384781	1.028968225	0.428480611	0.725412946	0.437516608	0.658253375
Mlu_00885	4.151753571	4.046919182	5.360986063	3.239122133	4.500826531	4.020831	2.507845074
Mlu_00886	20.51409436	19.63739887	19.81238199	18.24244234	23.91703086	20.95020157	20.84511788
Mlu_00887	1.7630785	1.69038655	2.862701235	0.481566318	1.306311264	0.527531987	1.507921509
Mlu_00888	0.463402071	0.696297795	1.312633678	0.363669207	0.404717957	0.233483696	0.535883306
Mlu_00889	0.874313518	1.139353679	0.882946871	0.642678579	0.957765932	0.625797749	0.657650312
Mlu_00890	0	0	0	0	0	0	0
Mlu_00891	4.392668547	9.638573464	3.744548056	4.356457103	7.819946484	7.59525159	22.68202112
Mlu_00892	2.492132132	2.520419407	2.826072352	1.730111578	2.902046084	2.542697418	2.771085864
Mlu_00893	3.026717783	4.557990694	3.019003282	2.404883613	4.539401708	4.794942416	1.145440526
Mlu_00894	5.656490858	5.545139867	8.917476328	2.579994024	5.397589406	3.346117423	3.652652036
Mlu_00895	6.931607893	7.360224768	8.07543762	4.936578045	8.052170682	9.902354311	4.768012074
Mlu_00896	0	0	0	0	0	0	0
Mlu_00897	1.645842675	1.404020695	1.91398476	1.108485255	1.428924947	1.188492435	0.929783823
Mlu_00898	0	0	0	0	0	0	0
Mlu_00899	4.850206379	9.455471235	7.686248337	7.744459306	8.626413076	7.025814145	9.67523618
Mlu_00900	4.27317218	2.271966488	2.257269072	2.669905864	3.218874166	3.713967349	0.437136567
Mlu_00901	6.24606155	6.353714505	6.764589149	4.704480022	7.03243918	7.426627524	4.411443093
Mlu_00902	0	0	0	0	0	0	0
Mlu_00903	4.421712043	4.54602118	4.064951556	3.866782783	4.55961152	4.48711886	2.948903999
Mlu_00904	0	0	0	0.02788156	0	0	0.123254281
Mlu_00905	7.177404621	8.09648707	8.425348137	4.524321311	6.840879662	5.519922798	5.249270931
Mlu_00906	0.353681051	0.313409438	0.369766105	0.153459881	0.370026564	0.179314857	0.135678116
Mlu_00907	0.024339864	0.043136848	0.08571559	0	0.020371792	0.014103099	0.94616849
Mlu_00908	0	0	0	0	0	0	0
Mlu_00909	2.59500391	2.020795439	3.807750245	0.218367054	1.974496776	1.093532635	0.965321698
Mlu_00910	0	0	0	0	0	0	0
Mlu_00911	1.407792953	2.307867088	2.91265025	1.075064497	2.710052602	1.794559647	3.600356792
Mlu_00912	2.210943897	2.38280658	2.104348565	1.659353965	1.950525817	1.384944659	2.567391117
Mlu_00913	5.14821005	6.100366475	6.429827563	5.236382943	7.164814353	7.249374285	5.144034094
Mlu_00914	2.38075704	2.288797291	2.402520923	1.574829833	2.293401754	2.420575238	1.286660547
Mlu_00915	0	0	0	0	0.037375667	0	0
Mlu_00916	1.255763477	1.37507439	1.753131426	0.821971559	1.268754554	1.169388342	0.825826979
Mlu_00917	0.089072155	0	0	0.24734606	0	0	0
Mlu_00918	0	0	0	0	0	0.048307982	0
Mlu_00919	0.092331395	0.068181795	0.02709629	0.064099176	0.012879804	0.098081537	0
Mlu_00920	0.020227649	0	0	0	0.016929983	0	0
Mlu_00921	25.92455741	18.31708562	10.35044913	1.554609262	1.513823517	0.099809362	0.704857926
Mlu_00922	33.2838486	41.85104354	26.91111301	33.23138195	35.41568075	46.99817611	16.18640743
Mlu_00923	9.04108156	7.751877203	8.298513363	6.931588618	8.632820732	10.21185718	4.966447506
Mlu_00924	5.247459293	3.905967657	4.831075312	4.08009381	4.617851366	4.2393306	3.864989515
Mlu_00925	5.633452959	5.673506592	6.280043471	4.725125647	5.841505292	5.547953656	3.422339151
Mlu_00926	0	0	0	0	0	0	0
Mlu_00927	5.022300622	4.450440339	5.428803996	3.544739601	5.079261338	4.397395563	4.681023197
Mlu_00928	4.050153289	3.663756329	4.642927787	4.451914992	3.742977275	3.080116921	4.143222018
Mlu_00929	0.016222614	0	0	0	0.013577879	0	0
Mlu_00930	0	0	0	0	0	0	0
Mlu_00931	0	0.040055645	0	0	0	0	0
Mlu_00932	0	0	0	0	0	0	0
Mlu_00933	0	0	0	0	0	0	0
Mlu_00934	4.706806375	5.603472629	5.58524051	2.017390117	4.487566382	3.4624043	4.438141079
Mlu_00935	0	0	0	0	0	0	0.091857752
Mlu_00936	0	0.194972842	0.774846227	0.61099391	1.104933627	0.382464849	0.450163816
Mlu_00937	0	0	0	0	0	0.130072505	0
Mlu_00938	0.582024765	0.429794147	0.427013796	0.134686249	0.649518161	0.112413026	1.587731065
Mlu_00939	0.064366639	0.228150332	0.094447675	0.059580291	0.179576986	0	0
Mlu_00940	1.998809772	1.473533371	1.493576821	1.119434747	1.729182023	1.489060569	1.615173207
Mlu_00941	3.321059394	3.116021925	3.072410773	3.156298355	2.928278372	3.035662474	2.507153174
Mlu_00942	4.871912692	4.305962767	6.272329297	4.357360493	5.253292001	4.92724855	4.97091958
Mlu_00943	39.51948876	41.60079669	46.00828701	36.4669748	39.51916568	34.24093709	22.23895886
Mlu_00944	3.029660645	3.386096422	3.44829646	2.671733691	3.186811032	2.245720902	2.485007815
Mlu_00945	0.73514727	0.945639157	0.668104384	0.526824157	0.754236159	1.085515867	1.552599257
Mlu_00946	7.00750166	6.815412475	6.838200646	4.851630408	6.389604744	6.60213687	5.750363511
Mlu_00947	10.95246474	10.01105199	7.972217343	14.60834499	14.54434912	20.4375052	5.205073897
Mlu_00948	0.455122105	0.806599975	0.554802962	0.777745673	0.73254732	0.811411202	0.644649764
Mlu_00949	6.29959922	6.459454709	6.909272431	5.82880722	6.810606038	6.485540309	5.587533704
Mlu_00950	0.254372797	0.15027256	0.298600885	0.117728729	0.047311776	0.065506527	0.057826232
Mlu_00951	8.333901289	7.963584285	9.893866599	5.177253026	7.823779658	6.850014358	4.359383136
Mlu_00952	0.26473238	0.469177674	0.699213826	0.735140083	0.443147351	0.306784554	0
Mlu_00953	0.309059662	0	0	0.286077769	0	0.238768754	0
Mlu_00954	0.515599049	0.514002118	0.425564186	0.223715035	0.485484901	0.541485152	0
Mlu_00955	44.74468029	42.19704967	62.91958862	32.3934455	55.23310886	49.35836254	101.876533
Mlu_00956	0.379052067	0.235124123	0.22804112	0.228062568	0.24851727	0.391676781	0.012925411
Mlu_00957	0.05988089	0.176875332	0.140584897	0.055428105	0.016706216	0.127220209	0.571731035
Mlu_00958	0	0	0	0	0	0	0
Mlu_00959	0	0	0	0	0	0	0
Mlu_00960	1.608864345	7.511606637	1.979983264	0.936772491	1.071468224	1.583762281	2.052868889
Mlu_00961	5.334490603	12.02444768	4.574372126	3.904725363	4.644258249	7.3802384	2.915598859
Mlu_00962	1.601329468	1.445031969	1.151134031	0.938307252	1.106643672	1.821647748	0.090172102
Mlu_00963	6.112606983	5.664799822	5.425076346	4.094856037	4.729963412	4.400985311	7.247492334
Mlu_00964	1.163350222	2.001132172	1.204961691	0.950155308	1.431899911	1.467099975	0.700048777
Mlu_00965	2.296253214	1.704138434	0.884462702	2.789721654	1.153140234	1.297241468	0
Mlu_00966	6.907665558	6.046783985	6.795557943	5.229106691	6.686594922	7.788875913	3.642866055
Mlu_00967	3.250968575	2.706205697	3.686119837	2.325309662	4.287590232	6.136259619	3.023338899
Mlu_00968	2.174777835	2.105039108	1.914681701	2.229850886	1.344169004	1.163186149	2.395886977
Mlu_00969	3.158810131	3.832148719	2.847241964	1.618597902	2.360568444	1.764922684	4.000776779
Mlu_00970	1.870013904	3.09322767	1.317093211	2.596437536	2.086866512	1.878120074	1.275323382
Mlu_00971	4.912853798	5.10875391	4.763033455	4.298238203	4.711371628	4.407124358	4.069038193
Mlu_00972	1.523863621	1.600818259	2.066519329	1.825749696	2.499434656	3.353835468	0.804583525
Mlu_00973	6.101548131	4.151027239	4.47074338	4.317859214	4.447881512	4.219650699	2.738318758
Mlu_00974	3.255098469	4.520835185	3.96803023	1.390637105	2.567248831	1.650321714	3.393934075
Mlu_00975	0.304806548	0.360133322	0.566522381	0.141070459	0	0.137365051	0.06929127
Mlu_00976	7.183548907	7.80543785	8.093752494	4.393337163	7.515539532	8.076883175	5.686432246
Mlu_00977	9.860000194	8.382742016	10.84468114	8.45221382	9.783454601	14.70507433	3.157536135
Mlu_00978	6.112966355	5.209770355	4.929098745	4.057171523	5.625087196	6.569290707	3.01312815
Mlu_00979	1.940082552	3.223456103	2.882343126	1.851935921	1.92825704	2.459034951	1.736580853
Mlu_00980	0.085998051	0.076205951	0.025237658	0.039801588	0.239926629	0.066439105	0
Mlu_00981	0.1372889	0.121656608	0	0	0.114907009	0.079548474	0
Mlu_00982	0	0	0	0	0	0.056453756	0
Mlu_00983	0.224072992	0.270762407	0.322813005	0.141416432	0.409184494	0.22425744	0.416767236
Mlu_00984	0.258551858	0.320756877	0.273155907	0.753876144	0.670842322	0.674150104	0.21159451
Mlu_00985	2.16677698	2.56007818	2.161989417	1.604523138	1.934434523	0.585891806	1.182169326
Mlu_00986	4.349982598	4.589676915	4.641124709	3.762061532	4.273329523	3.460325529	3.205466064
Mlu_00987	3.543884128	2.747817247	1.560023737	4.100448019	2.039216393	2.780661109	4.682704052
Mlu_00988	0	0	0	0	0	0	0
Mlu_00989	1.133921969	1.105289726	1.497463058	0.314880821	0.854155175	1.116936597	0.927982747
Mlu_00990	0.076274529	0.011264932	0.07834441	0	0.02127989	0.103122338	0.078027246
Mlu_00991	0.180795945	0.235602585	0.243441604	0.118130705	0.22253118	0.197190584	0.043517757
Mlu_00992	0.135331624	0.25316908	0.397154719	0.104390225	0.163610523	0.130690637	0.369177115
Mlu_00993	0.056841597	0	0.0750653	0.039461112	0.071362266	0.148209219	0.058147764
Mlu_00994	2.019759781	2.694727101	2.757214084	1.449441154	2.336285547	1.801468657	2.832280677
Mlu_00995	51.85893905	45.90356305	56.61942925	49.5324274	53.94558881	64.2901763	31.4805811
Mlu_00996	5.39937862	5.483061868	5.412893748	4.268259949	9.961878852	6.873629844	2.902835711
Mlu_00997	0	0	0	0.097013754	0	0	0
Mlu_00998	2.994831657	2.156234862	2.416938183	1.862527445	1.98438471	2.367930262	1.212694825
Mlu_00999	2.979782066	2.710284269	3.039457547	2.770354055	3.131227355	2.905483662	1.638269028
Mlu_01000	0	0.137896483	0.137004427	0	0	0.090167357	0
Mlu_01001	0	0	0	0	0	0	0
Mlu_01002	1.861838493	1.706006552	2.071630424	1.650055093	1.259908022	1.634257816	0.356610039
Mlu_01003	4.489096939	3.665687226	3.979193587	3.680192279	3.346901787	3.550976391	2.413675209
Mlu_01004	0.134509772	0	0.059211427	0	0.225161913	0.116907272	0
Mlu_01005	0.295323677	1.610442342	1.200018259	0.189251447	0.209150399	0.078977357	0.185913809
Mlu_01006	591.7423901	721.9583531	588.3624554	781.986032	598.1015439	533.029788	2209.952071
Mlu_01007	855.8628241	776.6164742	785.4437058	1185.246493	635.6995038	473.6537738	4116.731797
Mlu_01008	3.957220379	3.368911805	3.704986204	2.606123179	2.811769144	1.704094914	1.369767985
Mlu_01009	0.773224579	0.750959444	0.925819337	0.480968582	1.009581414	0.888881256	0.480923474
Mlu_01010	10.23590953	9.100741599	11.51331274	6.702046028	12.29203081	14.51987111	3.992333813
Mlu_01011	0	0	0.03186323	0.050250588	0	0.209702949	0
Mlu_01012	10.8502898	18.10913497	42.59180828	4.587517811	6.691552202	3.781604569	1.251836763
Mlu_01013	11.71701829	15.02783711	16.64990531	10.48896506	18.02218242	17.47900844	8.41141361
Mlu_01014	5.840905534	5.415951529	5.990575971	6.646738916	5.039872454	5.565005085	4.804738946
Mlu_01015	0	0	0	0	0	0	0
Mlu_01016	88.35780678	103.692017	118.5945011	60.16441719	87.38812137	77.55199314	90.59381442
Mlu_01017	0.348676755	0.926924858	1.184050999	0.968246721	0.792117585	0.49064831	1.426756083
Mlu_01018	3.293258697	3.703963665	3.888164383	3.38838013	4.078008729	3.796814606	2.435998935
Mlu_01019	235.6018985	272.48345	369.089925	254.7415335	346.5842977	205.0405702	144.5458091
Mlu_01020	1.833934206	1.65944815	2.205864467	1.649742935	1.621428354	1.249707303	1.40045132
Mlu_01021	4.222675214	3.741863645	4.239800319	4.446665783	4.44761097	5.044639906	3.251915264
Mlu_01022	8.22034978	7.587860586	8.336997682	5.874656425	8.499077088	9.70124758	5.647385606
Mlu_01023	9.698839548	9.625827527	11.42313845	7.481355857	11.63531307	13.26258584	6.658569687
Mlu_01024	0.212670856	0.335031568	0.353668255	0.328094169	0.336221505	0.342296066	0.048346185
Mlu_01025	2.953850241	2.348422361	2.819320006	1.418206471	2.102602543	2.159408934	1.242579308
Mlu_01026	0.517974029	0.589391726	0.518211446	0.47400874	0.458162309	0.460421411	0.710516332
Mlu_01027	1.836058388	1.762580142	2.09756481	1.623656021	2.140445436	2.184704642	1.945329623
Mlu_01028	3.295885993	3.558846107	4.195303168	2.744121366	3.568773368	3.592401369	2.452088994
Mlu_01029	2.651095992	2.852637699	3.784469096	2.602948978	3.360039446	3.028328121	1.70469558
Mlu_01030	12.16022484	10.995073	13.71489373	8.974983597	15.54649437	21.97008482	6.941885102
Mlu_01031	0.762815089	0.558399883	0.729983655	0.644692351	0.846647004	0.595730126	0.644631888
Mlu_01032	20.15996516	19.43378807	23.51569187	13.70932922	22.68052087	16.78376964	13.20283303
Mlu_01033	16.95142334	15.09889221	15.50254306	15.02191158	14.81111205	14.94882059	13.62183244
Mlu_01034	1.755293915	1.619570156	1.449776961	1.758770596	1.529715209	1.090455337	2.147350055
Mlu_01035	2.744697827	2.895446408	2.416441173	2.395423017	2.319114559	3.604778852	2.994952973
Mlu_01036	10.27067843	10.41015466	11.88712078	8.92157221	10.90277936	8.66048853	7.47037393
Mlu_01037	0	0	0	0	0	0	1.780025826
Mlu_01038	5.505760358	5.033735484	4.359996195	4.570534454	5.266478907	5.451982494	10.07253873
Mlu_01039	0.104068641	0	0	0	0.087102572	0	0
Mlu_01040	0	0	0.067579003	0.035525637	0	0.029650721	0
Mlu_01041	0.131190182	0.116252316	0	0.091076091	0.27450638	0.038007366	0
Mlu_01042	0	0.250560843	0	0	0	0	0.86776259
Mlu_01043	0.82543885	0.863112072	1.148216228	0.412591664	1.133025935	0.860902245	0.236433865
Mlu_01044	7.167133119	9.472757289	8.876734698	4.047974278	10.37062018	10.98030712	2.485365128
Mlu_01045	2.18738276	2.885940363	3.08124659	1.484800124	3.01061408	2.478513982	1.591215479
Mlu_01046	0.068012106	0.241071845	0.059878086	0.094432017	0.170772751	0.118223526	0
Mlu_01047	2.093228262	1.294105454	1.071444874	1.419385853	2.037179214	1.410309946	1.095563514
Mlu_01048	0	0	0	0	0	0	0
Mlu_01049	11.27719402	10.3521097	12.47488143	10.46477589	12.65590004	13.58714557	7.613787272
Mlu_01050	22.47176691	19.64025564	20.32625236	11.47908347	15.56925337	11.31346718	12.50627179
Mlu_01051	0	0	0	0	0	0	0
Mlu_01052	0	0	0	0	0	0	0
Mlu_01053	6.313816549	10.400195	7.822532817	6.150672029	8.651221061	8.629637926	6.146374618
Mlu_01054	0.948394455	1.72083189	2.876006605	0.71065762	1.196969708	0.601857917	0.21559726
Mlu_01055	12.54785578	12.85795971	13.72575748	10.62328209	11.34600092	8.876928678	10.60781579
Mlu_01056	25.05734931	22.89603677	22.4751648	21.83477099	23.36825404	23.14970383	37.87924504
Mlu_01057	18.670722	18.58623383	23.02195443	14.01207431	18.59109194	12.85042312	18.07969699
Mlu_01058	7.745144724	7.040939273	7.289624306	6.473170487	8.85308444	11.27013736	4.324810328
Mlu_01059	1.772757125	2.275101676	2.798570641	1.952145216	2.455859836	1.806416318	3.501918334
Mlu_01060	1.927724559	1.960746053	1.682417123	1.443018412	1.80987236	1.806577155	2.057761945
Mlu_01061	0	0	0.040541157	0	0.038541228	0	0
Mlu_01062	1.106990717	0.628810318	0.749691031	0.748800311	0.617680396	0.54273739	0.754952218
Mlu_01063	0	0	0.232762162	0	0.073759937	0	0
Mlu_01064	4.979894336	6.862375332	5.517549814	5.068591272	7.32938136	11.16285626	5.353361253
Mlu_01065	0	0	0.060186101	0	0	0	0
Mlu_01066	0	0	0	0	0	0	0
Mlu_01067	1.160394045	0.974147396	0.967845609	0.42398934	0.817867537	0.601585336	0.374860678
Mlu_01068	1.765521984	1.475600618	1.854647785	1.8663724	1.779948433	1.604227563	2.011329756
Mlu_01069	1.284015988	1.462901817	1.493811549	1.082416403	1.573647132	0.876844879	0.093822962
Mlu_01070	1.488476269	1.941158181	1.483539056	1.052841155	1.480872582	0.976368424	0.689515499
Mlu_01071	2.762601139	4.354933867	3.302676072	2.8667246	4.235014749	4.498857866	2.558348935
Mlu_01072	9.093252879	7.6615688	9.416576256	6.468037046	8.421787989	10.96956952	4.956094061
Mlu_01073	0	0	0	0	0	0	0
Mlu_01074	0	0	0	0	0	0	0
Mlu_01075	5.475334036	5.913812438	4.202022891	3.413852479	4.617289492	5.040147792	4.523194513
Mlu_01076	1.027285416	1.221153431	0.893395946	0.765355117	0.817867537	0.689600084	2.870727926
Mlu_01077	1.53256933	2.085599111	2.650369816	1.215948342	3.481663454	3.805745784	1.4558016
Mlu_01078	0.536735278	0.380496272	0.567052247	0.372617449	0.359386058	0.746393438	0
Mlu_01079	0.592953284	0.65679641	0.717802333	0.411645646	0.31017843	0.966294349	2.426315181
Mlu_01080	0	0	0	0	0	0	0
Mlu_01081	0	0	0	0	0.04410388	0	0
Mlu_01082	0	0	0	0	0	0	0
Mlu_01083	0	0	0	0	0	0	0
Mlu_01084	0	0	0	0	0	0	0
Mlu_01085	0	0	0	0	0	0	0
Mlu_01086	2.189384758	0.776036878	0.385508337	0.455980628	1.007849947	1.839443796	0.671908431
Mlu_01087	0	0	0	0	0	0	0
Mlu_01088	6.801987247	5.64756288	5.620015868	6.099332437	5.943695689	5.161656403	6.133320629
Mlu_01089	7.634519036	6.201452191	6.321802017	7.305554449	7.095070727	6.589604246	5.656939027
Mlu_01090	32.02056394	26.93248166	31.41976058	25.96903264	29.44774527	31.64849355	18.89880559
Mlu_01091	10.96540399	8.130870457	8.566518811	9.55500833	8.080630554	6.674949891	9.953811907
Mlu_01092	1.262447138	1.391553154	1.138571541	0.769546547	1.133947948	0.89206352	0.818972726
Mlu_01093	4.844691094	4.430904543	3.834840958	3.733601917	4.371078009	4.841655361	3.682912131
Mlu_01094	0.30410905	0.269481914	0.267738628	0	0.381796287	0.176208062	0.311097191
Mlu_01095	59.61030924	62.78556377	69.44960643	42.21153542	85.30448786	91.34790817	59.80650136
Mlu_01096	5.53438138	4.748028286	4.034544146	3.426103782	4.219068399	4.69779106	0.144243472
Mlu_01097	0	0	0	0	0	0	0
Mlu_01098	0	0	0.007683332	0	0	0	0.017855197
Mlu_01099	4.257403377	5.133652312	2.965373587	3.36715622	3.96927765	5.277167069	0.165388653
Mlu_01100	0	0	0	0	0	0	0
Mlu_01101	4.265309016	3.910670606	3.544901592	2.637355945	4.331533996	4.639683141	1.559160331
Mlu_01102	1.126234363	1.04186456	1.405590394	0.927927797	1.118722144	1.398358166	0.734314528
Mlu_01103	5.752199983	2.988031548	3.492590455	3.029435477	3.320298062	2.068735246	2.029096604
Mlu_01104	0.014901957	0.052820631	0.052478933	0.020690756	0.049890103	0.094980058	0
Mlu_01105	0	0	0	0	0	0	0
Mlu_01106	4.195232876	3.882770274	5.335051361	2.103439224	5.130390402	6.563209504	1.668969322
Mlu_01107	0	0	0	0	0	0	0
Mlu_01108	0	0.406081367	0.151295405	0	0	0	0
Mlu_01109	0	0.75286283	0.354312255	0	0	0	0
Mlu_01110	3.932461613	3.842711594	3.912706473	3.515382067	4.170560851	3.870434721	2.755360204
Mlu_01111	0.271770255	0.301031688	0.53835175	0.235838651	0.31276325	0.354307928	0.486526742
Mlu_01112	1.34284808	1.189945747	1.182247954	1.414440257	1.627755879	0.885399463	1.800027859
Mlu_01113	11.67782352	11.97156992	13.96223883	10.28406512	14.09189087	16.62622315	8.416357734
Mlu_01114	1.303881896	1.466490067	2.340035605	0.626672244	1.615982802	1.583645021	1.179938818
Mlu_01115	2.971810589	2.818590617	4.169874767	1.450630195	2.516471535	1.634496008	2.351327354
Mlu_01116	11.75696156	12.8739982	12.47649315	7.812227979	9.559101402	6.860923948	9.406930323
Mlu_01117	0	0	0	0	0	0	0
Mlu_01118	0	0	0	0	0.096053528	0	0
Mlu_01119	0	0	0	0	0	0	0
Mlu_01120	1.692370939	3.393991046	3.372035221	1.855095451	1.640120423	0.619326459	2.186854785
Mlu_01121	0.581822533	0.613778299	0.85373085	0.410329753	0.533347392	0.470900433	0.510164803
Mlu_01122	0.066916241	0	0	0	0	0	0
Mlu_01123	0.455512099	0.050455697	0.350905082	0.158114962	0.333594642	0.428893744	0.116494835
Mlu_01124	9.168228484	10.67764539	9.301718403	6.910413383	11.18146368	9.612717067	5.716666385
Mlu_01125	1.084181683	1.422622673	1.211502588	1.273750718	1.553101455	1.087270642	0.469232569
Mlu_01126	8.5579742	4.833841847	3.828136772	0.192094159	0.281217987	0.022903903	0.485244994
Mlu_01127	0	0	0	0	0	0	0
Mlu_01128	0	0	0	0	0	0	0
Mlu_01129	0.064543786	0.071493198	0.170473696	0.067212298	0.162064087	0.121544196	0.066026941
Mlu_01130	0	0	0	0	0.029964974	0.020744322	0
Mlu_01131	1.019724955	0.801958118	0.258108665	0.141584624	0.042674078	0.014771326	0.052157864
Mlu_01132	0	0	0	0	0	0.063744142	0
Mlu_01133	0.442801016	0.220714779	0.268017406	0.307405516	0.092653049	0.224498318	0.113244042
Mlu_01134	7.817391458	11.03745079	8.258949193	10.13051864	9.814410447	10.65962033	12.90187151
Mlu_01135	0	0	0	0	0	0	0
Mlu_01136	1.066483186	2.231365512	1.251913832	1.110576091	1.413310109	1.853837648	1.636484956
Mlu_01137	0	0	0	0	0	0	0
Mlu_01138	2.762536831	2.421940393	2.587390098	2.407494359	2.595038351	2.767132904	1.20256057
Mlu_01139	0.612657648	0.339311169	0.404539386	0.478490621	0.640971869	0.414153255	0.496165958
Mlu_01140	0	0	0	0	0	0	0.740364724
Mlu_01141	0.235005579	0.156185141	0	0.163147799	0.245866457	0.204251785	0
Mlu_01142	6.551514649	6.465709262	7.370190881	5.67742193	6.725777512	6.020384302	5.88757558
Mlu_01143	1.667112907	1.595836251	1.558332523	1.828912853	1.860436486	1.753047806	1.684367012
Mlu_01144	1.661195685	2.007334028	0.531826274	1.048410005	1.643170234	1.662563111	1.235904295
Mlu_01145	1.504545905	1.12932591	1.246689187	0.835600089	0.725928246	0.430756895	0.724291276
Mlu_01146	0.055465632	0.344050573	0.146496386	0	0.324962394	0.224966804	0.113480361
Mlu_01147	0.730926101	1.030431468	0.819012462	1.014860885	0.806417392	0.577521923	0.611772626
Mlu_01148	6.987963884	6.456724123	8.363525459	5.317384875	6.889432084	7.175796345	3.459791964
Mlu_01149	13.5607811	29.35506555	18.50538361	9.414293921	30.88821014	32.58031838	9.314322458
Mlu_01150	0	0	0.015254469	0	0.029003907	0.010039495	0
Mlu_01151	0	0.03175933	0.063107756	0.049762719	0	0.0207667	0
Mlu_01152	0.697818491	1.236723882	1.433510726	0.753582921	0.648949738	0.449258594	0.634536628
Mlu_01153	0.704817849	0.91691358	1.069413699	1.166004176	0.928799243	0.782020207	2.393152528
Mlu_01154	0	0	0	0	0	0	0
Mlu_01155	9.819875969	12.9633667	10.99524119	9.369345038	11.46440164	14.25385673	9.375825688
Mlu_01156	9.099543242	7.688387656	9.129119796	9.989945015	13.99230704	27.711243	2.164800517
Mlu_01157	3.085875271	2.806465173	3.324523545	2.508752569	2.854665061	3.305502807	2.533735967
Mlu_01158	0.429249531	0.355015148	0.503883636	0.158932094	0.26346465	0.157521053	0.26346797
Mlu_01159	1.782398803	1.13720211	1.380922299	1.583864042	1.223291145	1.239317431	0.948145463
Mlu_01160	10.69439282	13.83595901	10.10584046	21.87712208	12.59094788	20.11825296	11.81535115
Mlu_01161	0	0	0	0	0	0	0
Mlu_01162	0	0	0	0	0	0	0
Mlu_01163	0	0	0	0	0	0	0
Mlu_01164	0.472555742	0.443909414	0.380328102	0.442109472	0.448138389	0.520591748	0.1825772
Mlu_01165	0.237760588	0.144155061	0.110171168	0.243246916	0.188525398	0.203020889	0.051205074
Mlu_01166	0.284486111	0.288106658	0.357803609	0.394997286	0.34015286	0.164838062	0.415747622
Mlu_01167	7.024083234	7.469149871	6.060345911	2.535689314	4.585591351	3.17453911	2.011937225
Mlu_01168	1.633671865	2.014128852	2.188702463	1.232764303	1.66458556	1.35814883	1.525889322
Mlu_01169	8.761704674	8.858323615	7.610292786	8.654485421	7.973122823	7.529931854	28.51329644
Mlu_01170	23.53794513	20.67323321	19.43916725	17.35299318	22.31573368	23.77676463	25.1442598
Mlu_01171	12.68212198	11.81334052	11.67568358	12.9408766	12.88498082	10.07539991	15.93824939
Mlu_01172	5.130580455	6.960403881	6.075938024	2.994433769	6.251223964	5.432560166	5.38781647
Mlu_01173	2.512655907	2.267184886	2.389768628	2.202731702	2.172100868	2.183839454	1.294578195
Mlu_01174	0.166535908	0	0	0.231228272	0	0.096494891	0
Mlu_01175	0	0	0	0	0	0	0
Mlu_01176	2.962078799	6.385717297	3.211126703	1.626674738	1.794628834	0.486711756	0.994972852
Mlu_01177	0	0	0	0	0	0.052935098	0
Mlu_01178	2.304548927	1.871964681	2.113471464	2.399828682	4.219345532	4.673587814	1.276982039
Mlu_01179	0.077898977	0.207087215	0.137165041	0.216319063	0.065199288	0.090273063	0
Mlu_01180	0	0	0	0	0	0	0
Mlu_01181	0	0	0	0	0	0	0
Mlu_01182	0.79419714	0.234588837	2.097641478	0	1.107868377	0.306784554	1.083262729
Mlu_01183	0	0	0	0	0	0	0
Mlu_01184	0	0	0.022034234	0	0	0.007250746	0
Mlu_01185	3.097849275	2.818809486	3.285641357	2.410424504	2.601514826	2.078066994	1.637689202
Mlu_01186	1.220528226	1.584602001	1.524371763	1.02467411	1.354145482	0.888115729	6.446130476
Mlu_01187	3.563259767	2.910574204	3.11958012	2.708654249	2.449192302	1.53406063	7.860469799
Mlu_01188	0.341759582	0.584058982	0.365361915	0.2711538	0.449496633	0.282890974	1.49834099
Mlu_01189	1.663035326	1.664948593	1.585073952	1.484879847	1.490457164	1.154048976	1.615936882
Mlu_01190	0.007747211	0.006865081	0.00682067	0.010756684	0	0.004488919	0.047551407
Mlu_01191	0	0	0	0	0	0	0
Mlu_01192	2.721733043	2.702907401	2.065709397	2.280439841	3.456298971	2.990932745	16.41762697
Mlu_01193	11.47061688	9.530656294	11.24584585	9.914145513	12.80791254	12.78201154	5.644960795
Mlu_01194	6.052824151	5.515424805	6.217081133	4.757036516	6.691004544	8.062036198	1.869256568
Mlu_01195	1.344320207	0.510535822	0.676310868	0.799942894	0.642947891	0.667655402	1.178752652
Mlu_01196	0	0.042979415	0	0	0.040594885	0.028103257	0
Mlu_01197	1.131026849	1.475524965	1.382999766	1.177788261	1.314775237	0.646242025	1.253434853
Mlu_01198	0.408610359	0.344842156	0.325480794	0.189112903	0.390852071	0.417146142	0.119428526
Mlu_01199	4.419407388	3.902307849	4.31857986	3.829663716	5.364748101	5.956829895	2.212385283
Mlu_01200	5.879711805	7.470078869	5.301253369	6.393289156	7.885707897	8.209266848	5.942354341
Mlu_01201	6.240177671	5.208568633	4.253321305	6.707791367	3.80763051	4.502140002	3.665405347
Mlu_01202	4.997785308	4.56291997	4.633403833	3.94273848	4.341455258	4.56313618	4.95770156
Mlu_01203	0.276099006	0.326214948	0.405130818	0.319460112	0.231087227	0.13331531	0.470739171
Mlu_01204	1.28905716	1.468645312	1.351059818	2.215946505	1.566981314	2.080679444	15.32178812
Mlu_01205	5.8335169	7.814040179	10.72556132	2.938459074	5.472933116	1.776506799	12.4902537
Mlu_01206	1.051020117	1.190053917	0.668287848	1.864658919	0.781933111	0.98114445	6.331565941
Mlu_01207	0	0.28514188	0	0	0	0.279671633	0
Mlu_01208	0	0	0	0	0	0.038309912	0
Mlu_01209	1.108655893	1.679620722	1.29092384	0.943456151	1.197308774	0.953211641	0.951207289
Mlu_01210	0.635163056	0.541192998	0.516184325	0.339191472	0.245360261	0.396338574	0.499814237
Mlu_01211	59.70591541	69.13421786	68.36002551	38.11777184	68.00044659	61.70827538	43.89426218
Mlu_01212	39.24997758	35.8088142	29.22207411	27.11426224	36.3574248	39.360369	21.09788128
Mlu_01213	0.247939654	0.247171727	0.627574847	0.344254031	0.596616058	0.951761875	0.190227807
Mlu_01214	17.3458184	9.577159939	12.33452503	11.67145596	10.27425565	16.15824389	23.47721814
Mlu_01215	0.060905433	0	0.053621347	0	0.050976162	0.035290066	0.124609966
Mlu_01216	0	0	0	0	0	0	0
Mlu_01217	0	0	0	0	0	0	0
Mlu_01218	0	0	0	0	0	0	0
Mlu_01219	0.02141406	0.03795153	0.01885301	0.029732543	0.017922975	0	0.04381227
Mlu_01220	0	0	0	0	0	0.064762761	0.114339338
Mlu_01221	0	0	0	0	0	0	0
Mlu_01222	0.0447159	0.039624359	0	0	0.074851941	0	0
Mlu_01223	0.017033537	0.060376107	0.044989149	0.023650367	0.028513198	0.019739278	0.139399613
Mlu_01224	0	0	0	0	0	0	0
Mlu_01225	1.204576972	1.390126769	1.159166035	1.108521202	1.289555055	0.892740465	1.002999902
Mlu_01226	2.321671078	2.305612578	2.273076755	1.722929213	1.825913912	1.83229847	1.515099543
Mlu_01227	10.61458874	11.20710962	11.26716539	6.619869819	9.577204152	7.6334091	6.571575709
Mlu_01228	0	0	0	0	0	0	0
Mlu_01229	0	0	0	0	0	0	0
Mlu_01230	4.286956606	4.160618609	4.403292805	1.984087751	0.854300961	0.5914203	3.132476324
Mlu_01231	4.602446919	7.519536993	7.344267591	2.795760013	2.648332978	1.333383949	6.473784404
Mlu_01232	1.931451011	1.720260156	2.351140623	1.765023042	2.185670031	1.695822938	1.955672376
Mlu_01233	0	0	0	0	0	0	0
Mlu_01234	0.658986718	0.77860229	0.676869803	0.609984003	0.73540486	0.700026573	1.797678975
Mlu_01235	0	0	0	0	0	0	0
Mlu_01236	2.13461532	2.041385496	1.730465261	2.347584744	2.794901024	2.47369441	1.772877981
Mlu_01237	26.82075942	23.124488	24.95024976	24.29914846	23.14161508	19.34073417	33.33410442
Mlu_01238	1.016910345	1.28731522	1.25340779	1.371597173	1.021350978	0.606057112	1.426666961
Mlu_01239	1.71080915	2.243693647	1.536326157	0.855139777	1.345985916	1.486925651	1.890131698
Mlu_01240	14.4878855	16.79850265	16.21421567	13.09233957	15.5787747	14.4558333	7.937921896
Mlu_01241	6.061998349	4.956768442	7.169451295	5.237945052	7.403718662	6.36163538	9.049103493
Mlu_01242	4.521297124	4.45664986	5.143426884	4.373184241	4.889697356	5.004012582	1.247242867
Mlu_01243	5.624679564	6.609910593	6.034679199	6.298094083	7.01936799	6.167709854	6.846969791
Mlu_01244	5.663673878	6.026492763	6.694229373	4.64396378	5.766789494	5.219661226	4.835786605
Mlu_01245	6.40101357	6.406903916	5.985865972	4.927291543	6.009805782	5.938084157	4.68206319
Mlu_01246	0.333127477	0.295196181	0.410601167	0.246684707	0.464697464	0.11581322	0.045437658
Mlu_01247	16.95748555	14.10807884	17.94807309	11.51405804	17.24064769	20.23636817	8.863905605
Mlu_01248	0.50890021	0.193266296	0.192016051	0	0.182543739	0.168496549	0
Mlu_01249	10.50524778	10.14159505	5.865127801	7.708104406	9.50744731	13.36168973	4.019071808
Mlu_01250	3.822094886	3.236366409	3.78872403	2.673065816	2.74875975	2.805176787	3.533411939
Mlu_01251	0.497270925	0.413108967	0.574611175	0.647287749	0.234113626	0.180081672	0.635872182
Mlu_01252	0.533717489	0.118236542	1.292188336	1.29682844	1.563473686	0.927746061	1.091963634
Mlu_01253	2.772965321	2.686157717	2.699107942	2.869675908	3.027254648	3.532793514	3.840977838
Mlu_01254	1.643585837	1.569929086	1.898037232	1.244755341	2.286771296	2.090185351	2.314591083
Mlu_01255	0.027571713	0	0	0	0	0	0
Mlu_01256	0.362442695	0.339016414	0.478643646	0.167745601	0.286501477	0.058335548	0.453164908
Mlu_01257	1.105890369	1.063624931	1.377329664	0.805192502	1.365823847	0.961169021	1.186488191
Mlu_01258	4.176598397	4.105241746	3.934362127	3.701090859	3.59710828	3.749793742	4.69545534
Mlu_01259	2.703573447	2.523505635	2.538917474	2.102128415	2.906461635	2.408952203	1.942135321
Mlu_01260	5.29877267	5.720871314	5.79110553	6.08865792	3.976140621	8.575485929	4.859788659
Mlu_01261	3.278675694	2.905351882	2.886557078	3.439520542	2.134347301	1.562011048	2.534145869
Mlu_01262	1.839127536	1.430970792	1.711322168	1.494762779	1.764562094	1.897349251	1.682542976
Mlu_01263	13.16334165	13.02270434	13.97036182	8.637646607	13.28119225	10.5003986	6.087289812
Mlu_01264	7.478538748	9.582285022	10.18760748	6.384537885	9.346702167	9.222783557	10.02821204
Mlu_01265	0.309438412	0.317499892	0.487507418	0.226127648	0.245360261	2.066622567	0.499814237
Mlu_01266	1.638519742	1.296384812	1.906237723	1.056258076	1.689755387	1.288468109	1.616308127
Mlu_01267	1.691399243	1.498809407	2.978227133	1.341964806	1.820127028	2.660100977	1.483085154
Mlu_01268	4.376924905	3.932669116	5.000535644	2.939659425	4.361960199	4.482400544	3.248792541
Mlu_01269	4.471982531	3.977141694	4.593339824	3.464533623	5.166864705	6.083625228	3.281881925
Mlu_01270	0	0	0	0	0	0	0
Mlu_01271	0.402714105	0.356859383	0.21273051	0	0.539296897	0.093336876	0.164787239
Mlu_01272	3.61602334	3.445211594	4.404322333	1.962980435	3.891229019	5.151382126	1.168141948
Mlu_01273	4.098598563	3.209020685	3.410698283	2.806390279	3.030981849	3.545973219	1.780495837
Mlu_01274	0.191216769	0.338888047	0	0.265496634	0.080021572	0.221591145	0
Mlu_01275	2.620911985	2.390792268	2.850391398	2.408180754	2.387186454	1.808943377	1.81371106
Mlu_01276	0.194798191	0.421954254	0.133389652	0.601042869	0.271734491	0.689765597	0.177132863
Mlu_01277	2.320688105	2.377764291	2.905091951	2.139729014	1.896827849	2.45821064	1.928887468
Mlu_01278	0	0	0	0	0	0	0
Mlu_01279	0	0	0.064392834	0	0	0	0.823029278
Mlu_01280	0	0	0	0	0	0	0
Mlu_01281	0	0	0	0	0	0	0
Mlu_01282	4.988346927	4.184150699	5.196354137	3.436621907	5.290595278	5.449777074	2.1814242
Mlu_01283	15.70137551	15.13480293	15.21023143	13.18977446	13.42999079	12.03527167	11.88299093
Mlu_01284	0.228231007	0.635622944	0.172230295	0.181079648	0.191023036	0	0.066707298
Mlu_01285	0	0	0	0	0.029379288	0	0
Mlu_01286	0.543318294	0.577744544	0.191335699	1.207000235	0.727587801	0.975916032	0.333481944
Mlu_01287	1.472146638	1.398372318	1.454596567	1.088180738	1.373975748	1.294837166	1.235116342
Mlu_01288	0	0.041436874	0	0	0	0	0
Mlu_01289	3.132775981	2.374266054	3.828687288	1.402215863	2.691048026	2.304833149	2.951756536
Mlu_01290	5.390998383	5.287692443	5.519179766	4.761564845	5.017289789	5.182277644	3.339799179
Mlu_01291	2.707710062	3.28193629	3.288106236	2.506362841	2.735163567	2.308284344	2.674415852
Mlu_01292	0	0.014226093	0.014134064	0	0	0.009302117	0.032845971
Mlu_01293	0	0	0	0	0	0	0
Mlu_01294	0	0	0.015330422	0	0	0	0
Mlu_01295	0	0	0	0	0	0.01840854	0
Mlu_01296	0	0	0	0	0	0	0
Mlu_01297	0	0	0	0	0	0	0
Mlu_01298	12.71368431	11.34455978	15.83424093	9.349021483	14.97897132	17.99301635	6.978739587
Mlu_01299	2.461030644	2.846138391	2.276870802	1.969141704	2.583496201	2.731114345	0.768076116
Mlu_01300	0	0	0.010179379	0	0.009677222	0	0
Mlu_01301	0	0	0	0	0	0	0
Mlu_01302	1.760984825	1.872566019	1.688188231	1.52136764	1.686791587	2.392169723	0.760612479
Mlu_01303	2.933298015	3.516700487	3.357231035	1.916594764	2.209580332	1.479671853	2.718283402
Mlu_01304	0	0	0	0	0	0	0
Mlu_01305	4.760877303	4.387017488	4.667213871	3.365972165	4.97479164	5.779450157	2.001893331
Mlu_01306	9.786615753	8.766081119	10.37668471	7.790415713	9.077185894	10.17572704	6.016528256
Mlu_01307	0	0	0.100430713	0	0.047738191	0.06609693	0
Mlu_01308	4.011944295	3.752634515	4.464218869	3.249411638	5.293334719	4.487801384	4.161136893
Mlu_01309	10.62830489	14.53505345	12.37802209	12.25873865	15.68987195	15.15328303	9.417154894
Mlu_01310	0.574240484	0.654242202	0.65000989	0.227802668	0.480623392	0.760522697	0.167838855
Mlu_01311	3.76175228	2.7604912	3.648220038	2.733934272	2.90250735	2.945932261	1.322816627
Mlu_01312	14.45032966	11.94429346	14.32802549	9.406910161	14.2755061	12.3396841	8.675563484
Mlu_01313	83.1062296	84.94783181	106.9154199	80.82430159	111.4373103	78.33055963	46.62572775
Mlu_01314	0.058172753	0.083767058	0.064019359	0.03028893	0.0791196	0.071626707	0.386811806
Mlu_01315	1.046645216	1.403738057	1.07089752	0.824802762	1.775702188	1.950478468	1.099633877
Mlu_01316	7.843084514	7.774618675	7.506973325	6.881932264	8.535367531	8.780842038	9.247206187
Mlu_01317	2.788193277	2.940810193	2.900062693	1.88425712	2.808629404	2.037303478	1.893095142
Mlu_01318	0.105808642	0	0.023288571	0.073455478	0	0.03065403	0.054120013
Mlu_01319	5.962099581	6.775439787	5.529536189	5.71886115	9.123144323	10.99665031	5.819754815
Mlu_01320	0	0.035428278	0.070398183	0.05551148	0.033462691	0.092662964	0
Mlu_01321	6.505381703	14.47045189	9.29234918	8.295112126	13.77873941	24.27015206	16.56926638
Mlu_01322	0.708068757	0.705875702	0.876636715	0.61445275	0.870431119	0.910290965	1.720306345
Mlu_01323	0	0	0	0	0	0	0
Mlu_01324	0.710671951	1.889255556	1.407775431	0.986738828	0.297406377	0.514725421	0
Mlu_01325	0.077294875	0.068493755	0.090734223	0.035773587	0.021564557	0.059715334	0.105428052
Mlu_01326	1.41881482	1.885893891	1.353223437	1.96996613	1.484385922	1.712698466	1.935223807
Mlu_01327	0.096553077	0.085559137	0.051003392	0.026811997	0.048487352	0.044756131	0.03950871
Mlu_01328	5.161937937	5.615066057	2.64705617	2.738176244	2.651769024	1.361225853	0.88192976
Mlu_01329	0.414899979	0.480783174	0.533869795	0.48744519	0.3472598	0.295880588	2.8077941
Mlu_01330	0	0	0	0	0	0	0
Mlu_01331	2.366834033	2.184725365	2.316821691	2.298934983	2.106957614	1.485683642	1.815916247
Mlu_01332	6.836675799	5.817271067	5.820677831	5.587597529	5.806639581	4.708585145	4.498269696
Mlu_01333	0	0	0	0	0.035311106	0	0
Mlu_01334	1.647953204	1.616772137	1.256551449	1.062339279	1.145304319	1.347039619	1.174054346
Mlu_01335	0.544059722	0.530321872	0.415126404	1.687070248	0.850010803	0.924707591	0.111312341
Mlu_01336	0.034006053	0	0	0	0.028462125	0.019703921	0
Mlu_01337	0	0	0	0	0	0	0
Mlu_01338	6.50436045	6.948350821	6.260534818	5.521566944	5.820064307	5.265880366	9.331443081
Mlu_01339	3.687903592	3.689190116	4.531149358	2.571630264	4.554557849	5.356394745	3.018118531
Mlu_01340	0.062627547	0.027748255	0.082706254	0.043477889	0	0.0362879	0
Mlu_01341	0.385577335	0.355910289	0.325319263	0.26767915	0.430290078	0.474752064	0.06573959
Mlu_01342	76.08386093	77.98987341	108.5734517	55.47807387	101.036968	75.23880316	48.29192409
Mlu_01343	0	0	0	0	0	0	0
Mlu_01344	0.367484214	0.325640915	0.323534335	0.231925793	0.531264383	0.29035793	0.13670133
Mlu_01345	14.00990697	13.20932374	13.24035633	13.26748944	11.29525733	7.538449876	19.7307199
Mlu_01346	1.224217905	1.265627186	1.137683636	0.566592101	1.024636505	0.669933312	1.113199365
Mlu_01347	0	0.004480088	0.004451106	0	0.00423153	0.005858854	0.393067028
Mlu_01348	2.80806666	3.101770438	3.330644955	2.017131619	3.370358315	3.203276402	2.573364923
Mlu_01349	0.065789928	0.11659762	0	0	0	0	0
Mlu_01350	13.39258537	9.831188719	11.28505543	11.74569301	12.02172617	20.98410007	2.837347368
Mlu_01351	1.181878353	1.28003909	0.578072037	0.36466435	1.538754734	1.369617208	0.537349694
Mlu_01352	0	0	0	0	0	0	0
Mlu_01353	1005.647757	852.2436114	961.4667932	605.8902321	1188.564601	2017.862475	1503.495874
Mlu_01354	0	0.006793009	0	0	0	0	0
Mlu_01355	0.861321822	0.72601648	0.998750574	0.612539263	1.019813331	1.095520562	0.687698881
Mlu_01356	0.562481609	0.46520608	0.330140463	0.312393049	0.376625232	0.434553742	0.383604606
Mlu_01357	4.002543941	3.881634966	4.410976972	3.458781448	3.888832671	4.573467627	2.519703786
Mlu_01358	0	0	0	0	0	0	0
Mlu_01359	0	0	0	0	0	0.042216515	0
Mlu_01360	0	0	0	0	0	0	0
Mlu_01361	7.286422971	8.095042626	8.253317068	4.831951839	6.899535899	5.99891839	6.76409814
Mlu_01362	0	0	0	0	0	0	0
Mlu_01363	0	0	0	0	0	0	0
Mlu_01364	0.677347884	1.140422186	1.789018046	1.410704594	1.303919295	0.745695993	2.078738111
Mlu_01365	11.96886332	16.64050817	13.08094437	15.75870939	10.79483551	8.728592207	19.21025155
Mlu_01366	5.589722599	5.881988248	6.85893717	4.123084562	4.503001499	3.765127151	4.788966696
Mlu_01367	3.600857698	3.871563317	4.283302167	2.822020765	3.563002894	1.947328256	2.88139537
Mlu_01368	9.690124636	9.609372069	12.09106293	7.412118353	10.91950205	8.901835991	7.047095816
Mlu_01369	1.319965479	1.152716935	0.943155275	1.128847968	0.960673543	0.908916034	1.095893257
Mlu_01370	2.333282489	1.947743959	1.816058167	1.8311161	1.981195663	3.252540769	1.868008019
Mlu_01371	3.695571643	3.553027442	3.572573442	2.515269368	2.446170155	1.847398372	3.162764899
Mlu_01372	4.919279677	4.275959911	5.091346187	3.493317541	5.044479402	4.971790877	4.340856284
Mlu_01373	8.2329053	7.511314426	8.234729401	8.590198104	8.643972447	8.298702116	12.06003385
Mlu_01374	11.4446258	11.49723598	12.43969266	8.038914457	11.18576938	10.88122569	8.500678076
Mlu_01375	5.434729669	5.294838604	5.260586143	3.918864691	5.202125375	5.584712674	4.60741547
Mlu_01376	5.22696774	5.384471217	5.177069922	2.902972049	4.702939388	3.14220384	5.347078563
Mlu_01377	1.427647239	1.284552229	1.617862871	1.209668309	1.090730352	1.790173728	4.748345392
Mlu_01378	11.37186589	8.106765517	8.747606086	7.589187515	9.653630632	13.33930036	3.790853189
Mlu_01379	6.256318518	6.341116723	7.560115031	4.996238202	6.708023715	7.013189298	4.517705547
Mlu_01380	3.777970119	3.446259089	3.375051353	4.165588916	3.95257054	3.830831037	1.250371402
Mlu_01381	1.187353633	1.753594253	0.890483437	1.404355956	1.104202367	1.248558315	1.07967814
Mlu_01382	0.045731471	0.06078644	0.140917492	0.06349627	0.133965915	0.066244772	0.046782337
Mlu_01383	3.37078381	3.430581911	3.261476044	3.243699463	3.072651521	2.320530076	2.867844221
Mlu_01384	8.197024758	8.134660922	9.192297275	7.4673244	9.282100345	10.19756823	4.742864655
Mlu_01385	325.2504673	266.6555778	288.8583183	215.8382739	374.5114216	499.6191325	65.06207364
Mlu_01386	0	0.025238662	0.050150785	0	0	0	0
Mlu_01387	0.46532092	0.412337522	0.409670099	0.172287732	0.259640488	0.305567155	0.507747796
Mlu_01388	0	0	0	0	0	0	0
Mlu_01389	0	0	0	0	0	0	0
Mlu_01390	0	0.137125753	0	0.042971626	0.077710749	0.053798037	0
Mlu_01391	9.928816127	7.883153704	10.01425095	7.128443159	7.902663238	8.02683667	21.15909862
Mlu_01392	3.340090217	3.876659842	3.491994124	3.352162463	4.368067301	3.602445177	3.026876658
Mlu_01393	1.82947265	1.957628614	2.461595896	0.910618976	2.802417806	2.480094144	2.754301001
Mlu_01394	0	0	0	0	0	0	0
Mlu_01395	9.819875969	7.582947967	8.892464649	10.64789106	9.510515965	9.293456228	8.036422018
Mlu_01396	14.23273259	15.93509116	10.35458252	12.06993784	11.24664022	14.8639674	12.67079307
Mlu_01397	2.066709052	2.669998806	2.873276518	1.642498028	2.45197527	2.048250335	5.054148364
Mlu_01398	0.351886112	0.103939626	0.154900856	0.24428971	0.245432447	0.101945617	0.119990708
Mlu_01399	6.495422751	5.9251156	5.871495506	5.787354758	5.058551333	4.48814737	11.93910684
Mlu_01400	6.291468732	5.712413253	5.40260086	5.594128011	4.669169149	3.555638703	13.442765
Mlu_01401	1.526074505	1.427437531	1.959359956	1.265449269	1.614342686	1.461458986	1.214221764
Mlu_01402	0	0	0	0	0	0	0
Mlu_01403	0.48460449	0.479946017	0.752907209	0.19789807	0.811201092	1.073614328	0.29161191
Mlu_01404	0.036231095	0.224739688	0.127591909	0.201221549	0.121297694	0.12595898	0.222381907
Mlu_01405	0	0	0	0	0	0	0
Mlu_01406	4.479869653	6.002144585	6.22751411	3.779687166	5.274454131	4.620175382	2.938262792
Mlu_01407	0.39630911	0.468244916	0.203531924	0.275129464	0.30405811	0.210495068	0.743262523
Mlu_01408	35.41756946	27.35564932	31.84892397	35.9958297	31.12903994	37.63483198	22.68544619
Mlu_01409	1.26086959	1.117301673	0.999066435	0.700266265	1.055312951	1.24198263	0.257968638
Mlu_01410	5.600482283	5.54115781	5.264338655	4.852716524	6.837331148	7.356267837	5.212257975
Mlu_01411	4.037574062	4.049337037	4.684480132	3.911166858	2.462463164	3.1555602	5.443101818
Mlu_01412	11.86915804	13.53505463	18.10130031	12.87768814	9.771301763	20.18085391	8.160949299
Mlu_01413	0.105640425	0	0.372024738	0.146677393	0.088418112	1.101790632	0.216135886
Mlu_01414	17.179887	14.40591002	15.25023204	17.20019662	14.73559631	14.76712039	19.68071957
Mlu_01415	0.102892269	0.291764872	0.307994776	0.085717015	0.18945956	0.083465541	0
Mlu_01416	7.0681913	5.186197432	4.142560462	8.021791166	5.670099958	12.70192101	3.674687694
Mlu_01417	0.03555261	0.01575222	0.007825159	0.086385843	0.059513101	0.036050058	0.054554363
Mlu_01418	0.265817891	0.206106904	0.169669548	0.581296636	0.216920163	0.28878984	1.808308815
Mlu_01419	1.086867891	1.266558956	1.232149601	0.847560676	0.984446428	0.871308002	0.182768728
Mlu_01420	1.59653003	1.754719259	2.157417814	1.151317822	1.33625145	0.882041305	3.823499785
Mlu_01421	0.059148858	0.104827841	0.010414971	0.082125761	0.099011915	0.034272264	0.09681287
Mlu_01422	0	0	0	0	0	0	0
Mlu_01423	0.14657609	0.129886319	0.215076802	0.067838294	0.163573507	0	0
Mlu_01424	0	0	0	0	0	0	0
Mlu_01425	9.118005249	8.234674971	10.38704976	6.188422756	11.02059475	11.78168353	5.483275523
Mlu_01426	9.740580543	9.739748276	8.329511149	10.01050474	10.97275428	17.09376225	7.345365652
Mlu_01427	8.026572422	8.080491412	9.392344744	4.866930848	7.88729443	10.3465319	8.730700067
Mlu_01428	3.383440403	3.102472428	3.211915154	2.839085937	3.3859028	3.281616711	2.257296975
Mlu_01429	0.01845773	0	0.016250247	0.0384417	0.023172914	0.01069485	0.018881871
Mlu_01430	2.358008324	2.026955227	2.448932289	1.842849035	2.186309736	2.078064434	1.877755145
Mlu_01431	0.914652735	0.660412725	0.715789632	0.823120779	0.737185728	0.529971685	4.158535992
Mlu_01432	3.500939272	3.086796057	3.667864028	2.770718959	3.486925243	3.103647846	2.471157429
Mlu_01433	27.9374829	28.31704028	28.75476324	23.62457108	30.03963564	31.99068993	16.72086359
Mlu_01434	2.728453603	2.742116789	3.105204984	1.385980177	2.645680666	2.255719077	2.927304615
Mlu_01435	0.035269547	0.56256495	0.124205712	0	0	0	0
Mlu_01436	0.301298136	0.10268887	0.061214744	0.128720029	0.155186585	0.067145904	0.047418721
Mlu_01437	3.485025912	5.249950534	2.761405653	2.09682001	4.083618333	7.00026573	2.852086835
Mlu_01438	6.927392793	6.596715975	8.890436102	4.713494773	7.586484977	6.150648416	4.512845559
Mlu_01439	2.637459329	2.384843991	2.866993805	1.457328123	2.230005776	2.339092437	1.37656412
Mlu_01440	0.456511791	0.494427313	0.178628672	0.352137712	0.424541928	0.382075572	0.103778223
Mlu_01441	5.679540615	5.107221229	5.960932804	4.583869259	4.05111314	3.226017196	2.346917209
Mlu_01442	5.270966899	4.24015199	4.607665045	3.711164979	5.50674469	5.859153496	2.141538807
Mlu_01443	2.450521585	2.422931135	3.224816148	2.435436906	2.396453483	1.106020245	0.686080412
Mlu_01444	0	0	0	0	0	0.125004745	0
Mlu_01445	0	0	0	0	0	0	0
Mlu_01446	1.640290028	1.482020089	1.939647131	1.629957858	2.005477708	2.143111362	0.855441986
Mlu_01447	1.442799346	1.436141418	1.009236058	0.960470796	1.373005467	1.431493959	0.687430408
Mlu_01448	0.078636482	0.034841301	0.069231823	0	0.065816559	0.04556386	0.080443475
Mlu_01449	3.212983734	3.04349436	3.621251431	2.653582972	3.106464777	3.081400838	3.286815091
Mlu_01450	46.28600522	45.1723427	50.02989157	36.79221366	45.58702875	39.37333174	32.60706038
Mlu_01451	2.83111044	3.283508794	3.408886454	2.427896853	2.892258384	2.581238335	4.599794181
Mlu_01452	0.812665304	0.969973463	0.678969522	0.667800407	0.617713008	0.581389847	1.459085815
Mlu_01453	0	0.183432393	0.045561441	0	0	0	0
Mlu_01454	0	0.224169282	0.222719125	0	0	0	0
Mlu_01455	3.459850286	2.96646267	2.89787691	5.427063555	4.664584232	8.062225547	0.727002527
Mlu_01456	10.80606608	7.363724637	6.259011069	5.089001108	4.918872378	6.535911441	8.53320512
Mlu_01457	5.836633487	5.776781818	7.557682561	3.864949315	5.907214072	5.712784425	4.703116886
Mlu_01458	0	0	0	0	0	0	0
Mlu_01459	0	0	0.006490003	0	0.006169846	0	0
Mlu_01460	3.321353447	4.065253793	4.367920256	2.795760013	3.665967955	3.307685697	4.162151922
Mlu_01461	12.12018116	10.8588614	12.94419329	10.06319851	11.9386171	11.50456137	9.719577317
Mlu_01462	1.534632594	1.5474643	1.506394038	1.126616326	1.299208745	1.4104597	1.515762634
Mlu_01463	0.616399141	0.983184014	0.542679871	0.342337961	0.928636239	0.571450264	0.504450733
Mlu_01464	1.138071002	0.89388483	0.70592744	1.077385135	1.082424923	1.498694493	0.899626715
Mlu_01465	0.980338583	1.2077231	1.052552899	0.96277162	0.90056663	0.914392393	0.587043422
Mlu_01466	10.10755684	9.638554125	10.9128421	6.150672029	9.521565232	10.86958319	4.510373735
Mlu_01467	0.384091488	0.953000201	0.743941955	0.42663621	0.321473945	0.356082881	0
Mlu_01468	18.15292328	27.79028801	33.69317321	10.81540189	15.53364725	15.07090848	6.374796874
Mlu_01469	0.311778662	0.034534779	0.068622745	0.216445936	0.195712584	0.045163005	0.239207283
Mlu_01470	5.358001626	3.947063542	5.929656285	3.943759915	4.772659657	3.727958871	9.465393971
Mlu_01471	5.205590164	5.264087023	5.769212205	5.016907599	5.484612167	5.99700184	2.255382954
Mlu_01472	11.28590791	10.92483824	11.62817693	8.800192287	12.13262453	12.90095126	9.202733521
Mlu_01473	0.760852985	0.919389631	0.487169106	0.8323255	0.926273297	0.975227859	0.754750715
Mlu_01474	3.835606297	3.279189572	3.519565747	4.162954849	3.074649994	3.239757128	5.802721386
Mlu_01475	4.143980559	6.801422454	7.360198757	2.601694242	3.950956628	4.259380775	0.663527794
Mlu_01476	0.758784326	0.840482437	0.763470018	0.602023363	0.884577777	0.832209405	0.498998879
Mlu_01477	18.21384846	14.08620776	17.25980304	16.20324761	18.50790273	16.47805677	11.93811535
Mlu_01478	23.41579024	142.8196806	50.41034149	19.01637296	49.43965759	48.43401941	15.45702114
Mlu_01479	2.932501911	2.854517128	2.953405018	2.652747214	3.458505052	3.95183841	2.136283921
Mlu_01480	1.74506023	1.426254672	1.834678604	0.987996782	1.559828959	1.00131287	2.010471546
Mlu_01481	9.87817275	9.620075941	9.988376882	8.365058808	10.91998823	9.418520612	6.443292631
Mlu_01482	2.497325578	2.98330709	2.170822754	2.896843629	2.645813156	1.904924832	4.559675456
Mlu_01483	11.163235	9.583012648	10.0621531	10.94435204	9.857757427	9.529111725	9.227570444
Mlu_01484	18.27246353	20.12384972	17.15476123	19.01835752	22.44437484	22.053305	11.84130619
Mlu_01485	3.896631853	3.543811925	3.831848427	3.385400756	3.623747799	3.327286798	3.566575667
Mlu_01486	7.668923833	8.73119432	5.758213984	8.00283751	9.567078701	12.35337251	6.603827553
Mlu_01487	0	0	0	0	0	0	0
Mlu_01488	0.07270003	0.064422099	0.1280107	0	0	0.042124137	0
Mlu_01489	2.919142397	3.128170723	3.442635136	2.130238882	3.159167945	2.9973553	2.944553347
Mlu_01490	1.346655448	0.920560828	0.880731409	0.534221659	0.837284196	1.136985835	0.62976015
Mlu_01491	0	0.032211049	0	0	0.030423957	0	0.223111826
Mlu_01492	0.326846175	0.318593104	0.402859056	0.499193746	0.519766285	0.321950244	0.334356794
Mlu_01493	0	0	0	0	0	0.134385555	0
Mlu_01494	0	0	0	0	0	0	0
Mlu_01495	0	0	0	0	0	0	0
Mlu_01496	0	0	0	0	0	0	0
Mlu_01497	0	0	0	0	0	0	0
Mlu_01498	2.671482531	2.235779828	2.090650828	2.060691011	2.058500043	1.437355136	2.949765197
Mlu_01499	4.743062104	1.414278643	1.029109028	6.36706915	3.348940687	2.266324189	0
Mlu_01500	1.523495161	1.488487549	1.444466423	0.759342226	1.177036879	1.041191787	0.079923264
Mlu_01501	1.41881482	1.46680636	2.081882211	1.313310753	0.593754369	0.822095264	0.967611904
Mlu_01502	0	0	0	0	0	0	0
Mlu_01503	3.231898219	3.551236853	2.674651591	2.333426159	2.59680899	2.471883716	1.322465686
Mlu_01504	1.415368521	0.59409886	0.721423533	0.930875251	1.246972927	0.776935322	0.152409723
Mlu_01505	0	0.238709992	0.079055257	0	0.075155395	0.156087006	0
Mlu_01506	99.9274885	108.5336993	106.8081332	62.43211881	113.0591696	127.7364794	70.78125089
Mlu_01507	8.607683548	9.560239436	9.114361874	7.429258118	9.346239446	8.155232986	2.379859474
Mlu_01508	7.020115655	10.90175551	7.649174963	5.356102996	9.598821933	8.276203286	6.04377885
Mlu_01509	0	0	0	0	0	0.017808262	0
Mlu_01510	1.547374395	1.700795334	1.676693671	2.3757074	1.805681576	2.112149143	0.456614887
Mlu_01511	0	0.004675014	0.004644771	0	0	0	0
Mlu_01512	38.27792551	40.23344811	58.50089012	37.27215219	40.22031879	37.34929808	37.29287275
Mlu_01513	8.173916842	7.144653332	9.497215635	8.415354617	8.819281243	10.10059262	5.233201451
Mlu_01514	0	0	0	0	0	0	0.069681944
Mlu_01515	9.695357827	11.8745471	11.46239431	6.105800008	12.72276275	14.38538192	3.896415313
Mlu_01516	13.68799539	12.3287324	12.39042063	7.182723863	12.3439466	12.64143732	7.034136148
Mlu_01517	30.57345754	25.91431175	29.27185305	27.88734805	30.90777092	38.12574586	22.1552202
Mlu_01518	0	0	0.06632754	0	0	0	0
Mlu_01519	0	0	0.030757566	0	0.029240269	0.040485238	0
Mlu_01520	1.060337671	1.252804216	2.053754653	1.177788261	2.248265656	1.064934042	4.48344005
Mlu_01521	0.619849136	0.659124606	0.545717259	0.860635079	0.622555887	1.077466274	0.760911227
Mlu_01522	0.820343548	0.617895413	0.523619078	0.484080669	0.583614119	0.427794017	0.167838855
Mlu_01523	6.589524671	6.341116723	6.567667498	5.198021163	5.97774452	5.290949285	4.267852462
Mlu_01524	5.660038487	5.106342102	5.783572294	4.24940436	5.43395668	4.674488486	4.558721952
Mlu_01525	0	0.037361547	0.037119854	0.05854066	0.035288701	0.097719445	0.086262356
Mlu_01526	1.340196909	1.896323363	1.960179467	1.290560657	1.555917163	1.390260972	2.299730829
Mlu_01527	1.133188471	1.471612127	1.513695481	0.732438157	0.932094847	0.611314002	0.57961404
Mlu_01528	0.712365035	0.806599975	0.627168566	0.769291915	0.761849213	0.573279653	0.647764014
Mlu_01529	4.138776381	6.246871124	3.924084348	4.92558951	4.529900145	5.771266305	4.466512443
Mlu_01530	0.023508872	0.041664106	0.196624255	0.065282208	0.029514413	0.163459239	0.432883514
Mlu_01531	13.9451426	12.53257069	13.65808576	10.22060427	13.45733819	12.78742991	8.556462652
Mlu_01532	0.760490156	0.75813474	0.669538084	1.187898031	1.193454775	0.605888522	0
Mlu_01533	1.570406556	1.913441003	1.425797174	1.976028311	1.478685178	1.336461367	1.004058142
Mlu_01534	4.228907092	5.222420824	5.22824475	2.873367434	4.819714993	3.792798003	3.589728793
Mlu_01535	4.732189488	4.070028289	4.523633151	4.718485524	4.290770937	4.012109011	1.969594382
Mlu_01536	0.746384109	0.818044491	0.864630359	0.436346818	0.674021488	0.910469087	1.285954218
Mlu_01537	25.36065358	20.58731876	19.53023794	21.75468007	22.87302281	26.28976743	8.796905984
Mlu_01538	4.250960569	3.837558216	4.841936927	4.463602452	4.514131741	4.202678526	2.609186197
Mlu_01539	0.981987597	0.652630768	0.648408881	0.795345521	0.684913701	0.331909151	1.506829128
Mlu_01540	0	0	0	0	0	0	0
Mlu_01541	0	0	0	0	0	0	0
Mlu_01542	0	0	0	0.130680001	0	0	0
Mlu_01543	0	0	0	0	0	0.031200536	0.110169751
Mlu_01544	1.093545933	1.374260998	1.645446939	0.772974941	1.015115064	1.163569005	1.464446741
Mlu_01545	5.066942191	3.024351544	5.732208909	3.207778379	4.724307939	3.437902135	4.673095261
Mlu_01546	3.647494105	3.524944559	3.921002381	3.302866841	3.141340072	3.353945932	2.893117254
Mlu_01547	3.994493989	3.693881824	4.333939727	3.831704513	3.960608722	3.975955367	3.238507015
Mlu_01548	0	0	0	0	0.015440031	0	0
Mlu_01549	0.709155042	0.733142275	0.45785115	0.918990485	0.771606086	1.438154913	0.145090152
Mlu_01550	21.2121263	23.03356887	18.14164923	25.19796471	33.46481056	37.13581555	13.77749911
Mlu_01551	5.464360181	5.056183485	4.917157961	4.149817339	4.497714071	4.565598117	3.520726911
Mlu_01552	6.656259048	6.668330952	7.144816336	5.622561033	6.929575926	5.671199735	6.406698555
Mlu_01553	0	0	0	0	0.015521907	0.021491187	0
Mlu_01554	0	0.012668201	0.01258625	0	0	0.008283447	0
Mlu_01555	0	0	0	0	0	0	0
Mlu_01556	0	0	0	0	0	0	0
Mlu_01557	9.514235758	7.646113164	8.086756707	8.677928357	7.94197342	8.899614295	9.111617348
Mlu_01558	0.027261766	0.033820677	0.02880162	0	0.018253875	0.025273791	0.033465858
Mlu_01559	15.84223686	12.55020634	14.88396699	15.77826144	15.02432542	15.5692515	10.6514751
Mlu_01560	0.276003437	0.366864786	0.303742939	0	0.231007238	0.159922997	0.141172869
Mlu_01561	0.42622083	0.906454878	0.712967872	0.650969137	1.355593147	0.691495139	1.482450951
Mlu_01562	17.03374481	16.60842386	16.4057672	17.07352074	21.29011433	26.41335617	6.770920992
Mlu_01563	0	0	0	0	0	0	0
Mlu_01564	1.651287957	1.170612289	1.279343522	1.008808036	0.884532684	1.033339424	1.216247766
Mlu_01565	0.052507173	0.069792728	0.138682474	0.218712162	0.175788202	0.197755433	0.053713739
Mlu_01566	17.17861247	20.49310082	16.87958486	13.44029897	18.97100284	18.96930176	9.972184952
Mlu_01567	4.241981838	4.284702276	4.570382041	2.965502585	5.909092957	7.012766205	2.063518779
Mlu_01568	2.690800659	1.887661695	2.368989926	2.490710833	2.283405205	2.013855974	1.146930308
Mlu_01569	1.683793972	1.27218609	1.451209064	1.550382787	1.483462057	1.252914992	1.559303099
Mlu_01570	0	0	0	0	0	0	0
Mlu_01571	0.157310197	0.083638918	0.083097855	0	0.105331425	0.109379152	0.064370015
Mlu_01572	1.824222462	2.52695631	2.076790829	1.470222172	1.80761888	1.415405575	2.295139406
Mlu_01573	0.830597842	0.797357683	0.792199554	0.384417002	0.695187407	0.842219471	1.274526304
Mlu_01574	2.248234761	2.087109924	3.0161576	0.6441359	1.762236606	1.095906262	1.314226909
Mlu_01575	14.79701097	16.08288502	17.07802603	12.74434653	14.95838178	13.39647234	14.52209048
Mlu_01576	0.012046379	0.010674728	0.031817018	0.011150602	0.020164972	0.002326653	0
Mlu_01577	0.019469038	0.069008846	0.188546672	0	0.016295046	0.022561653	0
Mlu_01578	0.348067941	0.315779162	0.386698326	0.356705225	0.208088024	0.153660111	0.050866602
Mlu_01579	0.14932096	0.033079662	0	0.155494518	0.156221889	0.064890104	0.916513298
Mlu_01580	1.815850772	1.809090294	1.806419334	1.609601527	1.863278274	1.622803612	4.176925278
Mlu_01581	13.48589392	11.10117615	12.92246183	12.94821389	12.4219206	15.53330157	7.603224103
Mlu_01582	0	0	0	0	0	0	0.10268087
Mlu_01583	1.665429828	1.775959077	1.267436447	1.802873279	1.323041454	1.079480229	1.674823578
Mlu_01584	3.155107164	4.859906221	3.430262518	2.352073433	3.810459973	2.932393022	3.4658884
Mlu_01585	0	0.096369555	0.191492275	0.150998495	0.182045802	0.063013849	0.890012913
Mlu_01586	0	0	0	0	0	0	0
Mlu_01587	0.327598163	0.096765486	0.144209261	0.379047167	0.137095298	0.063272739	0.223417375
Mlu_01588	0.082492647	0.036549844	0	0.057268827	0	0.071697321	0
Mlu_01589	0	0	0	0	0	0	0
Mlu_01590	0.030621119	0.027134469	0	0	0.025629029	0	0
Mlu_01591	0	0	0	0	0.032091744	0	0
Mlu_01592	0	0	0	0	0	0	0
Mlu_01593	3.955458648	4.278251456	4.165222407	2.853682091	3.618950492	3.684995441	2.895918147
Mlu_01594	13.97907385	12.82677408	15.15534787	10.32762094	15.05992335	17.51310261	9.855612077
Mlu_01595	0	0.220118872	0.437389833	0	0	0.071965349	0
Mlu_01596	1.216003348	2.346651573	2.283889976	1.125580485	1.809353153	1.174302405	2.045600033
Mlu_01597	0.135885128	0.120412675	0.119633722	0.188670921	0.454928364	0.472410571	0
Mlu_01598	0.16695434	0	0	0	0	0	0
Mlu_01599	18.98509354	27.93314413	25.54486307	16.66152396	35.82744802	57.70030351	23.81864073
Mlu_01600	0.152403274	0	0.033544088	0	0	0.066229578	0
Mlu_01601	0.869378963	0.664648312	0.907979439	0.76922848	0.834652915	0.740792615	0.784726303
Mlu_01602	3.456703023	3.266085325	3.923281255	2.544308078	2.684020323	2.232143648	4.643839705
Mlu_01603	0.59701552	0.687747867	0.15768434	0.497358924	0.349779827	0.864812703	0.488587502
Mlu_01604	3.595068149	3.698673244	3.835684222	2.220841001	4.373210096	3.221694969	0.997336799
Mlu_01605	9.187723772	9.943393945	12.19965672	5.088769075	9.769917464	8.189015048	7.087656669
Mlu_01606	2.80526009	2.661607933	2.569548692	1.809792622	3.486312965	3.792681284	2.260993359
Mlu_01607	0.4737813	0.682231173	0.6778178	2.46684707	0.743515943	0.754930618	0.242334176
Mlu_01608	8.904562932	8.416695387	10.13922515	7.857767422	8.457630391	8.866725304	4.885220274
Mlu_01609	6.43891274	7.064263192	8.021216312	4.074769538	4.72929073	4.517640178	5.018569847
Mlu_01610	1.61594911	1.241023631	1.68825526	1.974437519	1.226270912	1.635438216	1.85145196
Mlu_01611	0	0	0	0	0	0	0
Mlu_01612	18.43467825	15.65278845	19.36113313	23.785159	25.252481	27.40782006	10.91476585
Mlu_01613	0	0	0	0	0	0	0
Mlu_01614	0	0	0.272097163	0	0	0	0
Mlu_01615	1.658186878	1.635276342	1.165543997	1.503937717	1.466203265	1.169998126	2.62651426
Mlu_01616	0.483256926	0.299761881	0.255276611	0.268392961	0.242683604	0.168006378	1.977446872
Mlu_01617	0	0	0.011284894	0	0	0	0
Mlu_01618	32.76570826	28.27978933	37.52379862	24.17557878	29.22713859	21.0905659	8.683924688
Mlu_01619	2.929017507	2.595507248	2.908552712	2.143750374	3.059632256	3.203521572	1.904639799
Mlu_01620	7.344598231	6.394284351	6.884508148	6.500673029	6.90113046	6.991401994	4.779394534
Mlu_01621	0.96069148	1.560722361	1.127728002	0.444626894	1.273114287	1.206069879	0.655178181
Mlu_01622	0	0	0	0	0	0	0
Mlu_01623	0.012469099	0	0.010977836	0	0	0.007224894	0
Mlu_01624	1.494641627	1.293654153	1.285285467	1.190452651	1.163696444	1.376251022	1.185261312
Mlu_01625	0.041176947	0.015637871	0.031073419	0	0.044310812	0.010225247	0
Mlu_01626	2.425833367	2.920820849	2.738995382	1.597276515	2.63318256	1.921450432	1.79082858
Mlu_01627	2.919677264	3.494248122	3.176184691	2.14341601	3.693621979	3.130674396	2.128501842
Mlu_01628	0.53891182	0.843669992	0.695874335	0.049883796	0.330773138	0.041634454	0.771813712
Mlu_01629	7.974995192	6.028220002	7.832061207	6.277579894	6.823764244	7.592349948	3.468863528
Mlu_01630	0.02086274	0	0.018367626	0.028967058	0	0.024176742	0
Mlu_01631	0	0	0	0	0	0	0
Mlu_01632	0.016030839	0	0	0	0	0.009288652	0
Mlu_01633	1.926023982	1.78799111	2.301277251	1.082416403	1.919081868	1.461408132	2.064105172
Mlu_01634	19.33431767	15.75432726	14.08717087	15.11954495	13.20623569	10.30139439	6.365527139
Mlu_01635	2.861985075	7.516434283	3.852586709	2.764346979	5.884357824	9.697465494	2.291283244
Mlu_01636	1.543457575	1.928826026	2.613202358	1.153937873	1.523698426	0.871385073	3.400761074
Mlu_01637	0	0	0	0	0	0	0.072973415
Mlu_01638	0	0	0	0	0	0	0
Mlu_01639	2.962409992	2.678890506	2.971541651	2.511739811	3.007863656	3.306356096	1.912682145
Mlu_01640	2.623153283	2.410428841	2.679511573	2.340173573	2.415395661	2.442641384	1.860622342
Mlu_01641	0.770803866	1.466520391	1.47699279	0.944320168	1.290283007	0.9720601	1.066816058
Mlu_01642	0.870695669	0.771554596	1.260795046	0.286324388	0.795869721	0.385014615	0.492230849
Mlu_01643	0.03152174	0.027932542	0.111007382	0.087533283	0.105531295	0.036528901	0.06449216
Mlu_01644	1.148340947	1.143213918	1.017243982	1.210581384	0.860270313	0.570909233	2.204429253
Mlu_01645	0.701972873	0.897679235	0.795653554	0.706191152	0.612158951	0.460322383	0.705203488
Mlu_01646	6.991251858	7.949590997	8.143280329	6.313888186	7.146060493	7.97632699	7.215195467
Mlu_01647	0.117690095	0.104289405	0.158875956	0.043575431	0.157605363	0.050007802	0.048157801
Mlu_01648	0.32992963	1.227922305	0.348565383	0.458093746	0.938882694	0.382338247	0
Mlu_01649	0.503473785	0.503100968	0.669605545	0.386709994	0.430359446	0.229655663	0.460251317
Mlu_01650	2.997861018	3.280581421	3.410177926	2.404946239	2.509126704	2.56419072	2.375513555
Mlu_01651	0.034944953	0.030965973	0.030765653	0	0.014623979	0	0.107243865
Mlu_01652	0	0	0	0	0	0	0
Mlu_01653	10.72045188	10.55904319	10.95847628	9.642258549	7.38462922	5.211220091	23.13703187
Mlu_01654	1.79874692	5.742850536	4.285097047	0.587643824	0.952008232	0.06130806	0
Mlu_01655	0.944411541	3.197298806	9.487207035	0.369847261	0.668839196	0.463027781	0.693619758
Mlu_01656	2.564681285	2.658578579	3.195217934	2.15001037	2.538079523	2.397287263	2.062590613
Mlu_01657	8.547230909	8.229821099	9.058119916	7.595992645	9.145684511	10.82144157	6.858337659
Mlu_01658	32.63978828	32.02897125	33.7032358	27.10040956	38.18164796	39.0958237	23.63958451
Mlu_01659	1.403189815	1.10303096	1.016193936	1.539762923	1.155488605	0.94417753	2.129998547
Mlu_01660	4.446634914	5.575927855	5.539857019	5.242050024	6.881653117	6.125232514	2.403147241
Mlu_01661	4.311922243	3.233110381	6.132372841	3.377240881	3.516422157	3.715615254	2.262054451
Mlu_01662	1.008969179	1.532714919	0.761399871	0.200130326	0.723839382	0.501103621	2.654111176
Mlu_01663	9.372016835	9.33541206	10.74055464	8.295175385	9.533180772	9.737672319	6.298276865
Mlu_01664	5.735324189	4.682954353	5.301868587	3.981631091	4.42314059	4.652457742	4.945141107
Mlu_01665	2.250750333	2.120247843	2.499275135	1.970767662	1.798959173	1.821094457	2.115783673
Mlu_01666	0	0	0	0	0	0	0
Mlu_01667	0	0	0	0	0	0	0
Mlu_01668	1.317199724	1.273328531	1.35134756	0.967340293	1.55802158	1.229977883	0
Mlu_01669	0	0	0	0	0	0	0
Mlu_01670	0.267216464	0.9734703	0.444376735	0.12367303	0.099401238	0.017203513	0.060745966
Mlu_01671	12.27509483	9.978442129	11.16429201	10.84584152	9.085197254	9.346156307	6.226693396
Mlu_01672	3.469357195	2.661565447	2.686770395	4.103421513	3.105405674	2.670998176	0.624375146
Mlu_01673	81.28250005	72.82844545	79.05036791	80.39236446	76.11377766	65.35962391	107.0276305
Mlu_01674	2.24374634	2.097709661	2.337860851	2.772375403	1.877953589	1.801028714	3.62195001
Mlu_01675	5.101630091	5.835277573	6.291274598	4.445966304	4.921010774	3.438192044	3.516253712
Mlu_01676	0	0	0.033239142	0.0524205	0	0	0
Mlu_01677	11.04351188	12.6545667	12.32059219	8.314989448	11.32724319	9.738986893	8.507986473
Mlu_01678	31.20401119	44.82176291	36.36376084	25.0282063	43.74579706	39.05032931	27.53190575
Mlu_01679	8.925440306	17.54268332	10.62198903	9.330480606	12.53020332	10.91451037	11.57242679
Mlu_01680	0	0	0.115614407	0	0	0.076089845	0
Mlu_01681	18.65513871	17.47561389	19.0701431	14.47216948	17.91873423	17.86955088	8.148486652
Mlu_01682	9.806942567	10.22989985	11.42144049	9.274255615	9.823915009	8.792024623	5.134640157
Mlu_01683	0.336387921	0.476936603	0.43436368	0.591610371	0.394166333	0.350840183	0.412941361
Mlu_01684	0.016750146	0.014842903	0.029493769	0.046513779	0.070097041	0.058232611	0.034270096
Mlu_01685	2.280072509	2.597726389	2.915485537	2.261276481	2.090105929	1.918781987	8.441307114
Mlu_01686	6.029212765	6.351462998	6.087656079	5.210118755	5.963790443	5.594438253	13.54318983
Mlu_01687	2.569675825	2.443443857	2.644574937	1.98759135	2.337342084	1.475334125	1.920529366
Mlu_01688	0.269674624	0.143381002	0.807236308	0.524205002	0.090284079	0.718777285	1.544880369
Mlu_01689	4.345626823	3.93693594	4.852664726	3.855414978	4.601658388	4.191237244	2.92578263
Mlu_01690	2.951745992	2.14007545	3.573249725	2.608058811	1.880971479	2.740386711	2.676440902
Mlu_01691	4.464195122	3.90516663	3.711942784	4.026279709	4.023823749	4.598509328	3.005486472
Mlu_01692	5.474699834	5.707444085	3.591330896	3.055463084	4.132939671	5.28695352	3.733668873
Mlu_01693	69.11444782	43.69116226	28.45989249	107.5234189	56.52596702	120.328892	8.462047427
Mlu_01694	2.459765333	2.391600028	1.594111659	2.087117501	1.515472804	3.543322165	0.978556614
Mlu_01695	28.15627805	21.62066026	13.34116281	24.98710512	25.05571278	37.8569058	9.811829487
Mlu_01696	6.747751677	5.332300437	5.780008816	7.067290478	7.499680826	8.361236175	5.035165647
Mlu_01697	1.136173552	1.3640571	1.645640042	1.017761505	1.656486264	1.486542916	0.449915518
Mlu_01698	3.413367486	4.387075175	3.961321152	2.428412221	4.037428879	3.882019575	2.539493436
Mlu_01699	2.175792046	1.756241021	2.228515023	1.989072896	2.118580523	2.090774778	1.586701575
Mlu_01700	0.590483331	0.539599927	0.324914691	0.435551615	0.509662525	0.673588469	0.264272787
Mlu_01701	0	0	0.182245764	0	0	0.119942248	0
Mlu_01702	5.013327131	4.555433233	4.97481994	3.863833292	4.071557957	3.864916533	2.346953809
Mlu_01703	1.872141169	1.28511861	2.414322449	1.903779437	2.405569122	2.154248442	5.556664946
Mlu_01704	0	0	0	0	0	0.04524261	0
Mlu_01705	0	0	0.137326033	0	0.130551626	0.271137053	0
Mlu_01706	3.174981514	3.617311832	4.059788734	2.414086291	3.258443817	3.394611226	1.469306017
Mlu_01707	0	0	0	0	0	0	0
Mlu_01708	0.046176392	0.163674213	0.04065385	0.128228048	0.077296723	0.080267119	0
Mlu_01709	0.341996084	0.320881734	0.318805941	0.19552545	0.218890373	0.058282564	0.246956353
Mlu_01710	6.204183448	5.188123038	5.274608921	3.975809545	4.479442774	4.696022817	3.958000545
Mlu_01711	0	0	0	0	0	0	0
Mlu_01712	1.733189719	1.961151383	3.638699024	1.221742638	1.450631828	0.695251111	1.909402703
Mlu_01713	53.49545186	46.55053152	43.94045915	59.74796993	60.25144177	63.80729526	19.10848405
Mlu_01714	9.35229919	8.058473152	11.82755166	7.245931667	11.24408869	11.45163999	5.338606812
Mlu_01715	0.028199672	0	0.049654172	0.052205449	0	0.03267913	0.057695348
Mlu_01716	10.3462389	7.903597067	7.538369734	11.39319114	10.60044153	10.0646438	4.42520095
Mlu_01717	1.144491455	1.372118903	2.133771068	0.560851553	1.014255183	0.351077157	7.713445247
Mlu_01718	2.463675492	1.645273242	2.074722594	1.338539587	1.673530135	1.861972884	1.753244137
Mlu_01719	0	0	0	0	0	0	0
Mlu_01720	0.210144932	0.074486778	0.185012303	0.058355522	0.140708394	0.170468204	0
Mlu_01721	3.176077679	2.023864168	2.701974517	2.67564143	2.479078615	2.398587291	2.847491636
Mlu_01722	1.808827967	1.744296662	2.060880036	1.477343161	1.914687493	1.664594813	1.959239795
Mlu_01723	0.215215635	0.238387847	0.284214851	0.224113556	0.135097148	0.031175272	0.880644356
Mlu_01724	1.507730281	1.622351002	0.853335512	1.046710799	1.352066269	1.060818227	2.203395016
Mlu_01725	0.046112302	0.102154403	0.040597425	0.096037558	0.038594721	0.013359286	0.094343839
Mlu_01726	3.447103656	3.476782683	3.108862149	3.268598379	3.729558757	3.458798525	2.52289194
Mlu_01727	2.245500117	2.101920448	1.865568605	1.40519875	1.350006958	0.934590451	0.194121093
Mlu_01728	1.624026074	1.844490062	1.993662004	0.857494723	1.493276908	0.530140606	4.399053498
Mlu_01729	0.816069335	0.766975413	1.284537595	0.583707245	0.724423051	0.372548567	2.023810532
Mlu_01730	0.729554539	0.736992203	1.079067802	0.486219133	0.72052801	0.388903652	1.014993866
Mlu_01731	0	0	0	0	0	0	0.391785223
Mlu_01732	0	0	0	0	0	0	0
Mlu_01733	34.78969461	42.96897052	50.53132851	17.86774754	42.63270046	58.14911456	36.33995472
Mlu_01734	127.0975757	138.9675679	146.3332515	107.2108137	150.5148136	131.182265	127.8527587
Mlu_01735	0	0	0	0	0	0	0
Mlu_01736	2.889035974	3.413437574	3.027996383	3.056234548	3.224057538	4.065371713	1.407344436
Mlu_01737	0	0	0	0	0	0	0
Mlu_01738	1.732249013	1.829141091	2.255654052	1.512224234	2.213834389	1.863167822	1.188443718
Mlu_01739	0	0	0	0	0.086358684	0.059784878	0.633304996
Mlu_01740	0.021161728	0.018752165	0	0	0	0	0.216480052
Mlu_01741	0	0	0.26470991	0.417466427	0	0	0
Mlu_01742	0	0	0	0.123342354	0	0	17.44806064
Mlu_01743	1.225974675	0.869104032	0.94982995	0.748974823	0.944018323	1.164988872	0.702321998
Mlu_01744	4.380034858	4.709072267	5.044125484	4.294517958	5.038534156	5.977890151	1.826250333
Mlu_01745	2.674190779	2.949241421	2.853389872	2.239910089	3.114050326	3.242139695	2.735641178
Mlu_01746	1.126234363	1.425709398	1.359826986	1.831798207	1.588999787	1.305134289	8.163551858
Mlu_01747	8.572550976	8.326151946	8.978687616	6.273802736	9.861190287	8.882129349	5.486362569
Mlu_01748	9.064544374	8.896664628	10.02327223	7.186798284	8.760535086	7.076822742	9.781475859
Mlu_01749	0.687266587	0.609011521	0.127383539	0.552455571	0.544948212	0.461095347	2.146181111
Mlu_01750	0.745169484	0.848984594	0.59981688	0.384293831	0.623686235	0.567467872	0.52271505
Mlu_01751	0.830807642	0.989047632	0.916154379	0.745724318	0.906079065	0.680753298	1.219046798
Mlu_01752	4.352014254	9.876339945	3.644624145	5.453071846	6.574296242	7.50347972	4.343433625
Mlu_01753	0	0.188723712	0	0	0.356506362	0	0
Mlu_01754	14.5250276	18.41905495	12.8613766	19.24016753	22.91673059	31.19779231	7.002422577
Mlu_01755	0.492206129	0.872322936	0.144446642	0.455605335	0.686604846	0.66545736	0
Mlu_01756	0	0.179517677	0.178356372	0	0	0	0
Mlu_01757	12.10880626	13.57715684	11.20869276	10.31617702	12.63900707	12.2869578	8.668884464
Mlu_01758	4.663005431	6.542422016	1.881607577	5.395326341	2.92710487	2.589279576	0
Mlu_01759	8.711981024	8.365572966	7.776957069	6.659247468	7.393313306	6.314310043	4.720036504
Mlu_01760	0	0	0	0	0	0	0
Mlu_01761	0.023488097	0.020813644	0	0.065224518	0.019658887	0.013609566	0.288333982
Mlu_01762	0.834073147	5.420081838	0.489547198	0.386025441	1.163493568	0.161093981	1.137652489
Mlu_01763	26.52590172	22.56218434	22.28605338	26.64743756	32.6215221	43.79605502	18.02979208
Mlu_01764	0.847283167	0.880836131	1.029328954	0.433763022	0.756693516	0.447053585	0.881279527
Mlu_01765	0	0	0	0.030259128	0	0	0
Mlu_01766	0	0	0.059633935	0	0	0	0
Mlu_01767	3.629411034	3.517361539	3.909712954	3.014438271	3.588360079	2.859019419	3.858631892
Mlu_01768	1.057525104	1.183718963	1.176061452	0.888726169	1.032639119	1.058884255	1.157743658
Mlu_01769	0	0	0.049661197	0	0	0.555623808	0.346221067
Mlu_01770	0.759865666	0.630364749	0.953664146	0.157133957	0.541265134	0.318503575	0.330777305
Mlu_01771	2.76405272	3.478042985	2.190133158	1.84213139	3.470153444	4.836706064	1.244129948
Mlu_01772	9.262297565	9.73789385	9.914468069	8.965895357	10.60793132	11.528001	7.19467991
Mlu_01773	0	0	0	0	0	0	0
Mlu_01774	0	0	0	0	0	0	0
Mlu_01775	0.35344589	0	0	0.981490217	0	0	0
Mlu_01776	2.010800829	1.619856895	1.649612445	1.0786942	1.262238483	1.853577927	2.618009099
Mlu_01777	0	0	0	0	0	0	0
Mlu_01778	0	0	0	0	0	0	0
Mlu_01779	0	0	0	0	0	0	0
Mlu_01780	0	0	0	0.024962143	0	0	0
Mlu_01781	0.051390431	0	0.045244308	0	0	0	0.10514267
Mlu_01782	0	0.032809323	0.043462771	0	0.051648396	0.035755443	0.025250645
Mlu_01783	0	0	0.168590461	0	0	0	0.391785223
Mlu_01784	0	0	0	0	0	0	0
Mlu_01785	0.47204892	1.082657383	0.855633579	0.385541498	0.836665161	1.029708958	0.340867879
Mlu_01786	0	0	0	0	0	0	0
Mlu_01787	0.743026824	0.870058519	0.513985456	0.884281921	0.866207951	0.922558982	1.62878761
Mlu_01788	11.01025047	10.44124909	11.79371142	8.568923168	12.4891226	13.05020469	9.880048872
Mlu_01789	16.61621742	12.60997729	10.51785688	14.4104614	10.81204523	12.59024453	14.95827743
Mlu_01790	0.11802456	0	0	0	0	0	0
Mlu_01791	0	0.018510468	0	0	0	0.012103572	0
Mlu_01792	0.416143368	0.294528718	0.240284258	0.315162536	0.325683568	0.267740948	2.487891932
Mlu_01793	11.23324106	10.35747695	11.05542973	7.008549074	11.89523657	11.48331262	8.465097913
Mlu_01794	0	0	0.151753282	0	0.072133583	0.199748179	1.057972548
Mlu_01795	0	0	0	0	0	0	0
Mlu_01796	0.725412963	8.099461317	1.660505615	6.446119157	5.707215391	24.37865467	4.749326549
Mlu_01797	2.161938882	2.36654117	3.218948499	2.825189066	2.474734118	2.39482775	2.211618213
Mlu_01798	0.418286683	0.635415088	0.526087141	0.414838491	0.60016179	0.830966795	1.833850798
Mlu_01799	6.429070505	6.559079997	7.112457042	5.402881858	7.328009837	7.499329869	4.586455787
Mlu_01800	0.150249468	0.099856074	0.462980476	0	0.125754647	0.152351741	0.15370206
Mlu_01801	3.31197635	3.248650932	3.245974154	3.065695463	3.591438389	3.620827102	3.153686822
Mlu_01802	15.9707087	12.77988044	15.33890782	20.4275779	14.21767107	15.98385511	16.43671699
Mlu_01803	6.221932929	5.700828639	5.717132444	4.27751282	5.586778795	4.235160767	2.162832517
Mlu_01804	0	0	0	0	0.059196373	0.0204904	0.072352034
Mlu_01805	5.325087213	5.060688807	4.382470863	3.911141621	5.038292007	3.845674437	9.710676605
Mlu_01806	1.649244637	1.652079229	1.925478937	1.294296092	1.80048537	1.461116615	0.929151071
Mlu_01807	4.862036151	6.628345007	6.475708287	5.192875071	3.652016395	5.056477122	3.570905468
Mlu_01808	0	0.354709627	0.352415001	0.277891809	0.083757519	0.057984129	0.204743181
Mlu_01809	0	0	0.082979986	0	0	0	0
Mlu_01810	9.835923046	9.192398759	9.383531638	9.704653867	10.27064117	13.41412177	3.041230465
Mlu_01811	3.840166648	5.990139638	4.419223085	3.674427446	5.898559814	6.650252444	3.531155129
Mlu_01812	0	0.07747605	0	0	0	0.025329909	0
Mlu_01813	2.333452132	1.870826363	2.054379084	2.3913566	1.627529046	1.931511447	4.887815482
Mlu_01814	0	0.059961098	0.059573208	0	0	0.039207191	0
Mlu_01815	0.190974314	0.169229175	0.286817551	0.171574114	0.225656774	0.097636842	0.321773899
Mlu_01816	1.105518896	1.088488735	0.951673598	0.801594192	0.904726748	0.75444217	0.452369074
Mlu_01817	0	0.14257094	0	0.223390025	0.269321998	0.093223878	0
Mlu_01818	6.090144573	4.842570142	6.367118155	4.756452592	6.712938952	4.96234058	5.11757425
Mlu_01819	3.388744407	3.0378864	3.199050102	2.643209627	2.902399159	2.897221248	4.104988827
Mlu_01820	0.641577521	0.529043915	0.557001904	0.655730758	0.693602562	0.490497364	1.294409621
Mlu_01821	0.887944241	1.573678347	0.521166059	0.821916084	1.114777133	1.02899229	0.302782789
Mlu_01822	2.579390071	2.447508614	2.672833523	1.521292979	2.177983218	2.327810796	1.868079319
Mlu_01823	2.127639793	1.909549283	1.945226642	1.249828676	1.575301513	1.15377943	4.855338303
Mlu_01824	0	0.307476753	0.091646303	0.144532763	0.058083543	0.140736413	0
Mlu_01825	0	0	0	0	0	0	0
Mlu_01826	5.696366997	5.30794822	7.109034372	4.117661566	3.366882005	5.393267035	7.449286163
Mlu_01827	1.728756275	1.655170163	1.399542826	1.324307375	1.471868074	1.168629888	4.085802029
Mlu_01828	3.40681238	3.328755992	2.392458595	3.634361911	3.336397838	3.878511384	1.573915108
Mlu_01829	0	0.037385269	0	0.058577829	0	0.048890745	0
Mlu_01830	0	0	0	0	0	0	0
Mlu_01831	0.390438942	0.389229661	0.988263293	0	0	0.014139354	0
Mlu_01832	0.03220932	0.028541831	0	0	0.02695831	0	0
Mlu_01833	0.977173932	1.381330699	0.962724732	0.839902693	1.051543976	1.860364737	0.380810847
Mlu_01834	1.742893833	1.325644854	1.687894535	1.431795784	1.616785575	1.388577301	1.337207926
Mlu_01835	0.915149719	1.093015415	0.945822774	0.994420029	1.432002802	0.922190695	0.732661828
Mlu_01836	0.378980004	0.55971291	0.389264478	0.789297266	1.321649062	1.171147118	5.556870073
Mlu_01837	0.553731895	0.490681651	0.621571958	0.576625503	0.336007247	0.352930064	0.623101749
Mlu_01838	2.741590063	3.051168656	3.626277311	2.092719853	2.794887188	2.79312519	4.492659532
Mlu_01839	0.335595088	0.324417621	0.282029085	0.402420002	0.204279128	0.203290545	1.529275517
Mlu_01840	2.774239842	2.593986501	3.419430088	1.859546683	2.35398903	2.239359409	1.487497827
Mlu_01841	34.2916009	40.84994314	42.17077397	26.39324292	41.0016013	32.97006062	29.04024648
Mlu_01842	1.229153487	0.800606267	0.665938986	0.685568977	0.54515882	0.639154697	0.150457914
Mlu_01843	0.319680269	0.04046859	0.160827189	0.12681798	0.038223363	0.343999313	0
Mlu_01844	0	0	0.025325061	0	0	0	0
Mlu_01845	0.198816187	0.145538463	0.175038438	0.204035562	0.202578352	0.245423652	2.139961776
Mlu_01846	10.95778635	10.12194515	11.80421043	7.929882432	12.0988158	12.7166653	9.573679508
Mlu_01847	1.125471331	0.797856343	0.33689537	0.375040977	0.621712315	0.026085001	0.046053344
Mlu_01848	0.197565394	0.175069767	0.115958157	0.457185731	0.330713533	0.496054509	0.269473682
Mlu_01849	0.449939121	0.579937686	0.504162796	0.567929089	0.462174453	0.556961739	3.305635065
Mlu_01850	4.474295921	4.151497566	4.685705324	3.798508929	4.305028916	4.066446497	3.840627152
Mlu_01851	3.291385564	3.677470523	3.485695535	2.847942181	4.152160247	3.040316415	1.951894795
Mlu_01852	0.499607725	0.332040215	0.329892238	0.086710602	0.313618379	0.61515493	0.06388603
Mlu_01853	3.831226084	4.623900966	4.681827993	3.144600339	4.116845543	2.878938113	5.613529269
Mlu_01854	6.593925336	5.159344678	5.079649736	6.16041181	5.254728775	9.22653129	2.97804334
Mlu_01855	26.63659047	24.84019032	29.84665549	26.21348795	31.50027681	30.70128895	17.0461661
Mlu_01856	0.210056356	0.465346139	0.585625349	0.53470015	0.351622714	0.22313808	0.214883255
Mlu_01857	0.04391793	0.194586246	0.193327462	0.030489121	0.12865332	0.050894199	0
Mlu_01858	5.05078822	6.933517586	7.114769425	2.995302792	4.972533473	4.374940615	5.359512829
Mlu_01859	0.019735024	0.017487912	0.052124345	0	0	0.011434946	0.040377034
Mlu_01860	0	0	0.074905109	0	0.142419955	0.147892938	0.174071027
Mlu_01861	2.657581933	2.553060772	2.937435674	1.873709583	3.24986687	3.262022655	1.490599748
Mlu_01862	2.245023915	2.940846327	2.427690262	2.507251543	2.98192762	2.502665695	1.997054315
Mlu_01863	4.605753274	4.399214804	4.717156413	4.338248296	4.678168129	4.800948528	1.965135182
Mlu_01864	1.11502327	1.373238751	0.748731529	0.97088253	0.964878994	1.335943773	0.850650852
Mlu_01865	0.419082303	2.145657676	1.065888678	0.323265874	0.896387406	0.404710527	0.571616563
Mlu_01866	3.101479005	3.375144014	3.353310112	2.644204729	3.151455522	3.070784762	2.716317662
Mlu_01867	0	0	0	0	0	0	0
Mlu_01868	0	0	0	0	0	0	0
Mlu_01869	3.21033259	3.676757678	2.74639548	2.102554249	2.991143628	3.000797593	3.841780899
Mlu_01870	2.83212849	2.539646244	2.612622534	2.271644025	2.880382531	2.386319146	3.37045729
Mlu_01871	5.17343799	7.318166341	7.855833816	3.295002872	5.839574216	5.472707744	6.506153326
Mlu_01872	0	0	0	0	0.010339281	0	0.126370582
Mlu_01873	0	0	0.035978407	0	0	0.094714542	0
Mlu_01874	0	0.020961836	0.020826234	0	0	0.054825862	0.048397819
Mlu_01875	0.56440992	0.513661233	0.322318954	0.360060002	0.331953583	0.371226213	0.218467931
Mlu_01876	0.029479959	0.026123247	0	0.040931713	0	0.034162788	0.060314762
Mlu_01877	0	0.016030982	0	0	0	0	0
Mlu_01878	22.95541706	24.34970287	22.88014353	22.18017279	20.38377554	15.37634603	29.90193001
Mlu_01879	1.103067506	1.338705624	2.005624165	1.132025527	1.746122104	1.403337284	0.834045843
Mlu_01880	14.37816735	13.05619109	12.12719182	13.00470558	12.02510706	9.236603663	16.0316734
Mlu_01881	9.242377163	15.92021287	11.56313348	12.29233868	13.27268489	10.78567053	25.14633971
Mlu_01882	0	0.021295406	0.031736468	0.033367118	0.020113921	0.048736027	0.024583991
Mlu_01883	0.044957935	0.07967767	0.118743349	0.124844493	0.263399829	0.130248517	0.367928207
Mlu_01884	1.343560466	1.39763389	1.028587079	0.648862104	1.784568991	1.370821267	0.657338109
Mlu_01885	0.045049375	0	0.079323241	0.187647621	0.03770508	0.078308057	0
Mlu_01886	0	0.050542316	0	0	0	0	0
Mlu_01887	0.419119016	0.464245452	0.368993788	0.26671771	0.496953941	0.303559486	0.500208309
Mlu_01888	0.707620285	0.546138286	0.261254405	0.348629641	0.420312551	0.568726501	0.420317847
Mlu_01889	10.00014161	9.088700927	3.095967724	11.08748486	5.671870793	11.71599049	0
Mlu_01890	0	0	0	0	0	0.01440923	0
Mlu_01891	2.153449515	1.570424761	2.050116478	1.816875518	1.992101609	2.083580411	1.243761649
Mlu_01892	0	0	0	0	0.003958926	0	0
Mlu_01893	0	0	0.076073979	0	0	0	0
Mlu_01894	0.166714979	0.126627523	0.20968061	0.132272517	0	0.082798842	0.536001504
Mlu_01895	0	0	0	0	0	0	0
Mlu_01896	4.606435174	4.388071612	4.511767089	6.955482667	3.566299348	4.270526061	2.709564876
Mlu_01897	0.885971032	0.588817981	0.390005934	1.230134406	0.741533234	1.155043845	0.906329817
Mlu_01898	0	0.038789063	0	0	0	0.025363282	0
Mlu_01899	7.47195308	5.750491979	6.759387579	7.074964902	9.007792807	13.71647666	1.309004549
Mlu_01900	6.440934029	6.451344216	6.258795927	4.328779231	6.42318037	7.503765121	5.257133506
Mlu_01901	1.650744542	1.785736095	2.378161689	1.175761632	1.910952316	2.136554728	0.43861743
Mlu_01902	1.120760954	1.666465985	1.237583153	1.081378873	1.335522977	0.792482913	9.366444502
Mlu_01903	4.145232415	4.289111184	5.02622515	3.411934241	3.760296469	3.236021233	4.570583684
Mlu_01904	0	0	0	0	0	0	0
Mlu_01905	334.4602343	622.9333408	813.9608528	108.4505681	193.0258515	7.07826312	13.63281618
Mlu_01906	0	0	0	0	0	0	0
Mlu_01907	1.95754647	1.915344907	3.410956155	0.90599097	2.42348474	1.283907166	1.029077431
Mlu_01908	2.475721852	2.508960934	4.371309822	0.74066347	2.072110673	1.133328324	1.427217599
Mlu_01909	0.289300807	0.283345041	0.308322748	0.295976427	0.152928485	0.158805295	0.623049828
Mlu_01910	0	0	0	0	0	0	0.052867771
Mlu_01911	0	0.011451147	0	0.053827351	0	0	0
Mlu_01912	10.35752183	10.96663664	11.38385145	8.345287649	10.46957803	9.625365379	20.69190903
Mlu_01913	51.08168599	44.95401037	53.00247084	52.0283986	60.87484008	73.23344374	38.81228331
Mlu_01914	5.368055925	11.95634766	5.662749917	4.700295218	4.938157998	7.986111013	4.749326549
Mlu_01915	3.637925745	4.000014891	3.934920207	3.030666329	3.504676624	3.630752348	3.645572446
Mlu_01916	19.64113263	18.0256251	19.19026603	16.94328537	17.35036188	15.83406959	18.35009103
Mlu_01917	6.066295771	6.040579763	6.359390879	4.645566403	6.569112059	5.997168829	4.862192898
Mlu_01918	0.743596994	0.81707061	0.759411734	0.867261275	0.348527258	0.913418738	2.981881894
Mlu_01919	0.0509439	0	0	0	0.042638635	0.009839372	0
Mlu_01920	6.203336035	3.579440617	4.82638694	3.605474268	5.022978049	5.31631123	0.413220281
Mlu_01921	0.033009353	0.058501538	0.029061545	0	0.027627915	0.038252818	0
Mlu_01922	5.271763689	5.856804079	5.091551716	5.134664038	4.675742416	5.151764537	6.922234833
Mlu_01923	177.7318102	213.0892258	256.2963754	156.7525638	201.4018662	81.3016299	1.649872239
Mlu_01924	9.040907543	10.03701368	12.14471671	6.521207123	7.766872139	3.083806947	0.535142541
Mlu_01925	0	0.014925678	0.029658246	0.023386586	0.02819518	0.009759559	0
Mlu_01926	2.708335564	2.33359493	2.153676646	2.287440011	2.07877226	1.475262613	2.06835223
Mlu_01927	39.00504347	37.23114544	44.0985753	30.70127994	45.2195568	45.26611288	25.00848679
Mlu_01928	2.647108571	2.034533676	3.495784897	1.6501803	2.328595216	1.878120074	1.768448422
Mlu_01929	0.124574105	0.309090804	0.219350919	0.138372824	0.271089202	0.332033601	0.305848082
Mlu_01930	3.640816476	3.859060766	4.813233912	2.9583042	2.880692002	3.018525436	3.880164648
Mlu_01931	31.03401355	31.82500201	47.263431	24.67218723	49.01660359	26.46522308	14.84947157
Mlu_01932	1.761874211	2.081679732	2.769928509	1.397880006	1.790634229	1.191017433	4.54881442
Mlu_01933	0.01827498	0	0	0	0.015295653	0.010588961	0.037389844
Mlu_01934	0	0.048763394	0.072671913	0	0	0	0
Mlu_01935	0	0.130125521	0	0.10194484	0.184359091	0	0
Mlu_01936	3.290630537	3.377329278	3.098777756	3.470054741	3.155089688	2.491945401	4.452819268
Mlu_01937	0	0	0	0	0	0	0
Mlu_01938	8.364265992	6.301385416	6.953395273	7.040900875	6.390845633	6.450683464	7.39374324
Mlu_01939	1.319361194	0.977820475	1.28828675	1.731958189	1.405433024	1.473341127	2.503040829
Mlu_01940	3.465096428	3.204047966	3.728611966	2.42881431	3.670771645	3.423860918	2.465892938
Mlu_01941	11.65751358	14.16228874	10.19709913	8.45847936	13.91161669	14.48979734	6.770545319
Mlu_01942	6.310785723	5.553270116	5.904256503	6.040838599	6.907735184	7.562787083	4.243925331
Mlu_01943	0.012612286	0.005588099	0.016655848	0	0.015834201	0.00730786	0
Mlu_01944	0.8930588	0.960950946	1.132577233	0.782365482	1.210182238	1.423014018	0.674309383
Mlu_01945	1.893664158	1.808279807	2.055369427	1.381350417	1.935051633	1.844008748	1.71165648
Mlu_01946	0.066348305	0.058793608	0.146033176	0.046060949	0	0.057665694	0.203618781
Mlu_01947	0	0	0	0	0	0	0
Mlu_01948	0.045555414	0.018631515	0.037021975	0.058386297	0.023463766	0.024365443	0.071695745
Mlu_01949	0.048255503	0.042760928	0.042484307	0.033500392	0.02019426	0.055920787	0
Mlu_01950	1.594216452	2.452590726	1.637479097	0.676348474	1.482572277	0.307909056	1.540247272
Mlu_01951	0.028991199	0.051380278	0	0	0.024264831	0	0
Mlu_01952	0	0.091007416	0	0	0	0	0
Mlu_01953	0.146268802	0.203679176	0.128775544	0.203088227	0.12242294	0.133181156	0.128254219
Mlu_01954	0.065530402	0	0.057693186	0	0.054847133	0	2.279231787
Mlu_01955	0	0	0	0	0.135646323	0	0
Mlu_01956	3.466594042	3.554233289	4.514943661	2.718211625	3.397006586	3.259178044	4.826030426
Mlu_01957	2.766600992	2.976923624	4.393003645	3.498337622	3.762798751	3.406449011	3.43664094
Mlu_01958	4.127846082	3.921320066	4.604308014	3.181382084	4.113664886	3.547120698	2.504991596
Mlu_01959	0	0	0	0	0	0	0
Mlu_01960	1.64763916	1.681809049	3.305135035	1.245192548	0.994995158	1.208457675	1.706835813
Mlu_01961	0.822762014	1.006823199	1.172777278	0.435189059	1.213298776	0.885352004	1.36270108
Mlu_01962	0	0	0	0	0	0	0
Mlu_01963	1.80197498	1.96747897	2.01141075	1.563730177	1.642864186	2.088214862	1.711712486
Mlu_01964	0	0	0	0	0	0	0
Mlu_01965	0	0	0	0	0	0	5.932340617
Mlu_01966	0.156102962	0.230547369	0.366489523	0.288990072	0.130653859	0.301499307	0.212920082
Mlu_01967	0.947944155	1.110977324	1.164364242	1.379867747	1.26048706	1.864831488	0.750756406
Mlu_01968	0	0	0	0	0.032091744	0	0
Mlu_01969	1.623260786	1.125727421	2.112618443	1.910856684	1.624442161	1.329046733	2.815735224
Mlu_01970	5.002367273	4.311745239	4.464225171	4.432845591	4.772715187	6.242143427	2.410203906
Mlu_01971	0.215428835	0.466642493	0.189664269	0.066469799	0.400684384	0.027738805	0.979463058
Mlu_01972	0.059169926	0.087387649	0.069457869	0	0.066031454	0.057140786	0.161412256
Mlu_01973	0	0	0.055085584	0	0	0.181268651	0.256025372
Mlu_01974	8.947892447	14.47913069	10.27533199	13.93624166	14.65266197	16.45554269	11.46178222
Mlu_01975	0.397458456	0.672385949	0.44535751	0.55185475	0.816533332	0.439657799	1.774218238
Mlu_01976	6.005040335	7.176636395	6.138061081	7.714490852	6.791607885	7.573700196	3.076332073
Mlu_01977	20.00731608	16.41515237	19.12728359	14.51061839	15.97724369	19.35301944	9.390771212
Mlu_01978	2.932252667	3.303017847	1.793968957	1.656127098	3.660523069	5.672990216	1.423554686
Mlu_01979	1.721446305	2.135609259	1.515567102	1.434094514	1.852460891	1.738407959	1.811317916
Mlu_01980	0.088283207	0	0	0.081718406	0.049260401	0.085255672	2.047069116
Mlu_01981	0	0	0	0	0.015935528	0	0
Mlu_01982	8.448514715	9.139998308	7.346835655	10.21913527	8.155708734	7.117664882	7.847317444
Mlu_01983	0.963011991	0.853359393	0.423919494	0.835689134	0.806014385	1.534478539	0.985141105
Mlu_01984	2.453080845	2.363966977	3.482517225	2.043601228	2.951418616	2.647308614	1.38019769
Mlu_01985	0.024582992	0.021783869	0.021642949	0	0	0.014243974	0.100591545
Mlu_01986	0.099921545	0	0.087971263	0	0	0	0
Mlu_01987	13.38517386	12.07288667	11.78435197	17.09134583	17.80479977	16.96557207	7.824430071
Mlu_01988	0	0	0	0	0	0	0
Mlu_01989	0	0	0.064594284	0.033956599	0	0.014170578	0
Mlu_01990	7.189621222	8.361912163	9.148490847	5.849117525	9.895989796	10.04032196	4.769148865
Mlu_01991	0	0	0.0537692	0	0	0.070774745	0
Mlu_01992	1.533947747	1.390178865	1.289106708	1.597367604	1.809092097	1.858412623	1.141233767
Mlu_01993	0	0	0	0	0	0	0
Mlu_01994	10.68322658	10.03806122	9.283925043	9.270763453	10.3290492	16.08896833	26.0028097
Mlu_01995	7.541868103	10.58746789	3.354889756	12.29032135	7.109682439	12.69582244	3.004856919
Mlu_01996	0.485020638	0.214897074	1.067534491	1.010146866	0.405948851	0.281032566	0.992331916
Mlu_01997	2.064207656	2.134029667	2.855812683	2.661348474	2.221308873	3.13251536	1.508315153
Mlu_01998	0.978340475	0.913804269	0.279351644	0.18356562	0.243440079	0.168530074	0.973772584
Mlu_01999	0.023072162	0	0	0	0	0	0.047204678
[truncated: 44,856 more rows]
